# Supplementary material for: Mechanistic insights and comparative analysis of Ru(ii)–NNC pincer complexes with anionic-, protic-, and classical-NHCs for transfer hydrogenation of ketones
Source: Royal Society of Chemistry journal article supplement (doi:10.1039/d3cy01383a), 2023-01-01
Supplement: d3cy01383a1.pdf [file d3cy01383a1.pdf]

## Supporting Information

### **Mechanistic Insights and Comparative Analysis of Ru(II)-NNC Pincer Complexes with Anionic-, Protic-, and Classical-NHCs for Transfer Hydrogenation of Ketones**

Shambhu Nath,<sup>a</sup> Ekta Yadav,<sup>a</sup> Abhinav Raghuvanshi <sup>a</sup> and Amrendra K. Singh<sup>\*,a</sup>

<sup>a</sup>Department of Chemistry Indian Institute of Technology, Indore (MP) 452020, India

\*Corresponding author. Email: [aks@iiti.ac.in](mailto:aks@iiti.ac.in)

## Overview

|                                                                                                                                            |     |
|--------------------------------------------------------------------------------------------------------------------------------------------|-----|
| Schemes for ligand synthesis.....                                                                                                          | S4  |
| $^1\text{H}$ and $^{13}\text{C}\{^1\text{H}\}$ NMR spectrum of $\text{NN}^{\text{OMe}}\text{C}$ .....                                      | S5  |
| LCMS of $\text{NN}^{\text{OMe}}\text{C}$ .....                                                                                             | S6  |
| HRMS of $\text{NN}^{\text{OMe}}\text{C}$ .....                                                                                             | S7  |
| $^1\text{H}$ and $^{31}\text{P}\{^1\text{H}\}$ NMR spectrum of <b>3</b> .....                                                              | S8  |
| $^{13}\text{C}\{^1\text{H}\}$ NMR spectrum of <b>3</b> .....                                                                               | S9  |
| LCMS of <b>3</b> .....                                                                                                                     | S10 |
| HRMS of <b>3</b> .....                                                                                                                     | S11 |
| $^1\text{H}$ and $^{31}\text{P}\{^1\text{H}\}$ NMR spectrum of <b>3'</b> .....                                                             | S12 |
| $^{13}\text{C}\{^1\text{H}\}$ NMR spectrum of <b>3'</b> and $^1\text{H}$ spectrum of <b>3'</b> after adding 10 equiv. $\text{PPh}_3$ ..... | S13 |
| $^{31}\text{P}\{^1\text{H}\}$ NMR spectrum of <b>3'</b> after adding 10 equiv. $\text{PPh}_3$ .....                                        | S14 |
| HRMS of <b>3'</b> .....                                                                                                                    | S15 |
| HRMS of <b>3b'</b> .....                                                                                                                   | S16 |
| $^1\text{H}$ and $^{31}\text{P}\{^1\text{H}\}$ NMR spectrum of <b>4</b> .....                                                              | S17 |
| LCMS of <b>4</b> .....                                                                                                                     | S18 |
| HRMS of <b>4</b> .....                                                                                                                     | S19 |
| $^1\text{H}$ and $^{13}\text{C}\{^1\text{H}\}$ NMR spectrum of $\text{NN}^{\text{Me}}\text{C}^{\text{Me}}\cdot\text{HI}$ .....             | S20 |
| LCMS of $\text{NN}^{\text{Me}}\text{C}^{\text{Me}}\cdot\text{HI}$ .....                                                                    | S21 |
| HRMS of $\text{NN}^{\text{Me}}\text{C}^{\text{Me}}\cdot\text{HI}$ .....                                                                    | S22 |
| $^1\text{H}$ and $^{31}\text{P}\{^1\text{H}\}$ NMR spectrum of <b>5</b> .....                                                              | S23 |
| $^{13}\text{C}\{^1\text{H}\}$ NMR spectrum of <b>5</b> .....                                                                               | S24 |
| $^1\text{H}$ NMR and $^{31}\text{P}\{^1\text{H}\}$ NMR spectrum of <b>5</b> after adding 10 equiv. $\text{PPh}_3$ .....                    | S25 |
| $^{13}\text{C}\{^1\text{H}\}$ NMR spectrum of <b>5</b> after adding 10 equiv. $\text{PPh}_3$ .....                                         | S26 |
| LCMS of <b>5</b> .....                                                                                                                     | S27 |
| HRMS of <b>5</b> .....                                                                                                                     | S28 |
| $^1\text{H}$ and $^{31}\text{P}\{^1\text{H}\}$ NMR spectrum of <b>6</b> .....                                                              | S29 |

|                                                                                                                                 |           |
|---------------------------------------------------------------------------------------------------------------------------------|-----------|
| $^{13}\text{C}\{^1\text{H}\}$ NMR spectrum of <b>6</b> .....                                                                    | S30       |
| LCMS of <b>6</b> .....                                                                                                          | S31       |
| HRMS of <b>6</b> .....                                                                                                          | S32       |
| $^1\text{H}$ and $^{13}\text{C}\{^1\text{H}\}$ NMR spectrum of $\text{NN}^{\text{OMe}}\text{C}^{\text{Me}}\cdot\text{HI}$ ..... | S33       |
| LCMS of $\text{NN}^{\text{OMe}}\text{C}^{\text{Me}}\cdot\text{HI}$ .....                                                        | S34       |
| HRMS of $\text{NN}^{\text{OMe}}\text{C}^{\text{Me}}\cdot\text{HI}$ .....                                                        | S35       |
| $^1\text{H}$ and $^{31}\text{P}\{^1\text{H}\}$ NMR spectrum of <b>7</b> .....                                                   | S36       |
| $^{13}\text{C}\{^1\text{H}\}$ NMR spectrum of <b>7</b> .....                                                                    | S37       |
| LCMS of <b>7</b> .....                                                                                                          | S38       |
| HRMS of <b>7</b> .....                                                                                                          | S39       |
| LCMS of <b>8</b> .....                                                                                                          | S40       |
| X-ray Diffraction Studies .....                                                                                                 | S41       |
| Crystallographic Data.....                                                                                                      | S41-S42   |
| General method for transfer hydrogenation of ketone.....                                                                        | S42       |
| General method for transfer hydrogenation of ketone using CuI as phosphine scavenger .....                                      | S43       |
| The molecular structure of CuI capped anionic NHC complex <b>1b</b> .....                                                       | S43       |
| Mechanistic investigation of transfer hydrogenation reactions using Mass spectrometry .....                                     | S44-S45   |
| NMR experiments for the mechanistic investigation of transfer hydrogenation reactions .....                                     | S46-S53   |
| NMR tube experiments to evaluate the effect of excess triphenyl phosphine.....                                                  | S53-S55   |
| Computational details .....                                                                                                     | S56- S57  |
| Calculated energy profile for TH using complex <b>5</b> .....                                                                   | S58       |
| References.....                                                                                                                 | S59       |
| Calibration curve.....                                                                                                          | S59       |
| GCMS data.....                                                                                                                  | S60-S128  |
| Computational data.....                                                                                                         | S129-S336 |

## Schemes for ligand synthesis

### a) Synthesis of $\text{NN}^{\text{OMeC}}$

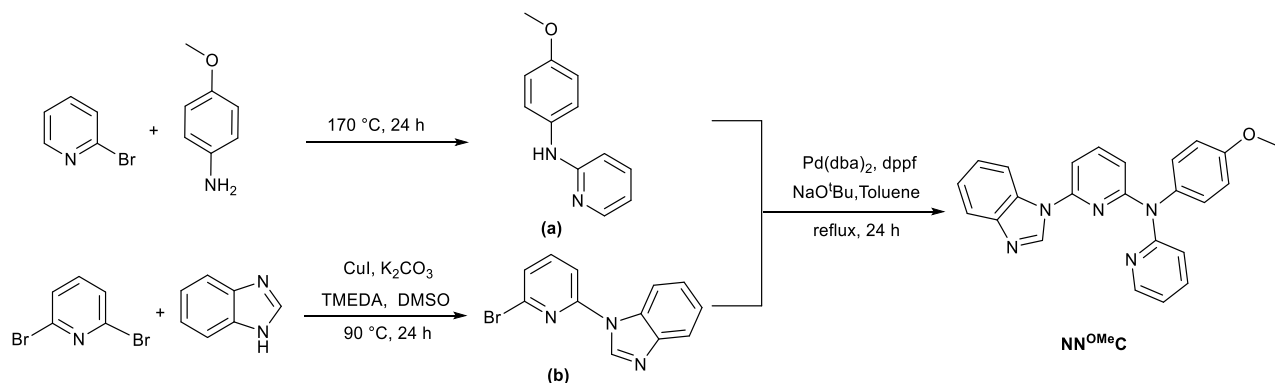

Scheme S1. The synthetic procedure for  $\text{NN}^{\text{OMeC}}$ .

### b) Synthesis of $\text{NN}^{\text{MeC}^{\text{Me}}\cdot\text{HI}}$

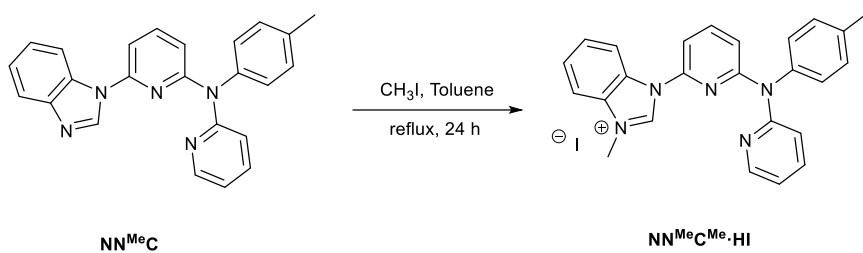

Scheme S2. The synthetic procedure for  $\text{NN}^{\text{MeC}^{\text{Me}}\cdot\text{HI}}$ .

### c) Synthesis of $\text{NN}^{\text{OMeC}^{\text{Me}}\cdot\text{HI}}$

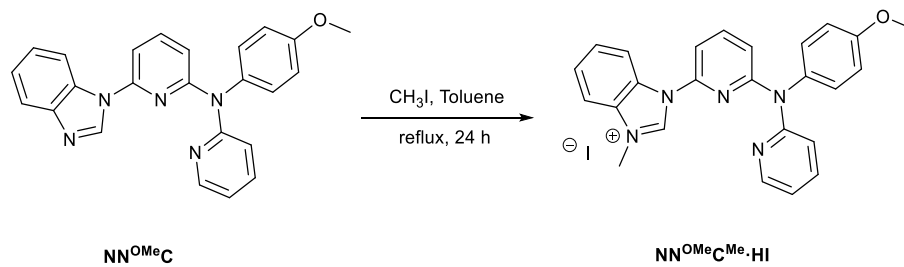

Scheme S3. The synthetic procedure for  $\text{NN}^{\text{OMeC}^{\text{Me}}\cdot\text{HI}}$ .

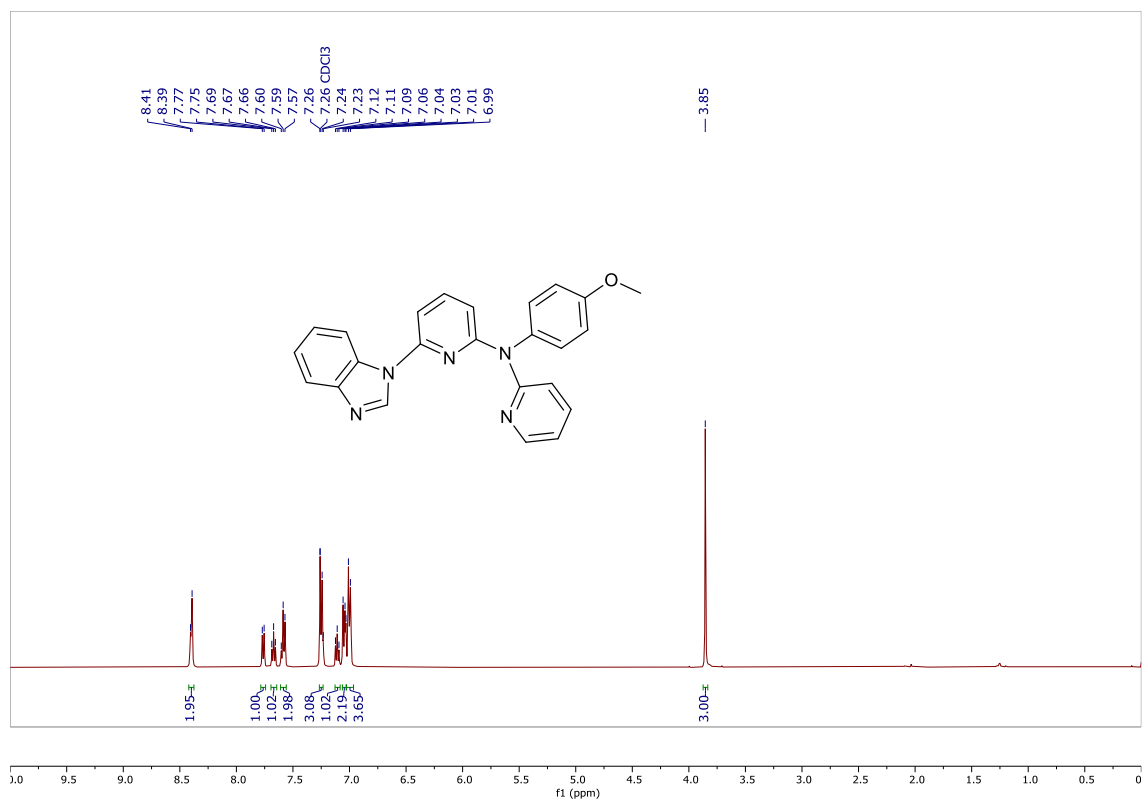

Figure S1. <sup>1</sup>H NMR of NN<sup>OMe</sup>C in CDCl<sub>3</sub>.

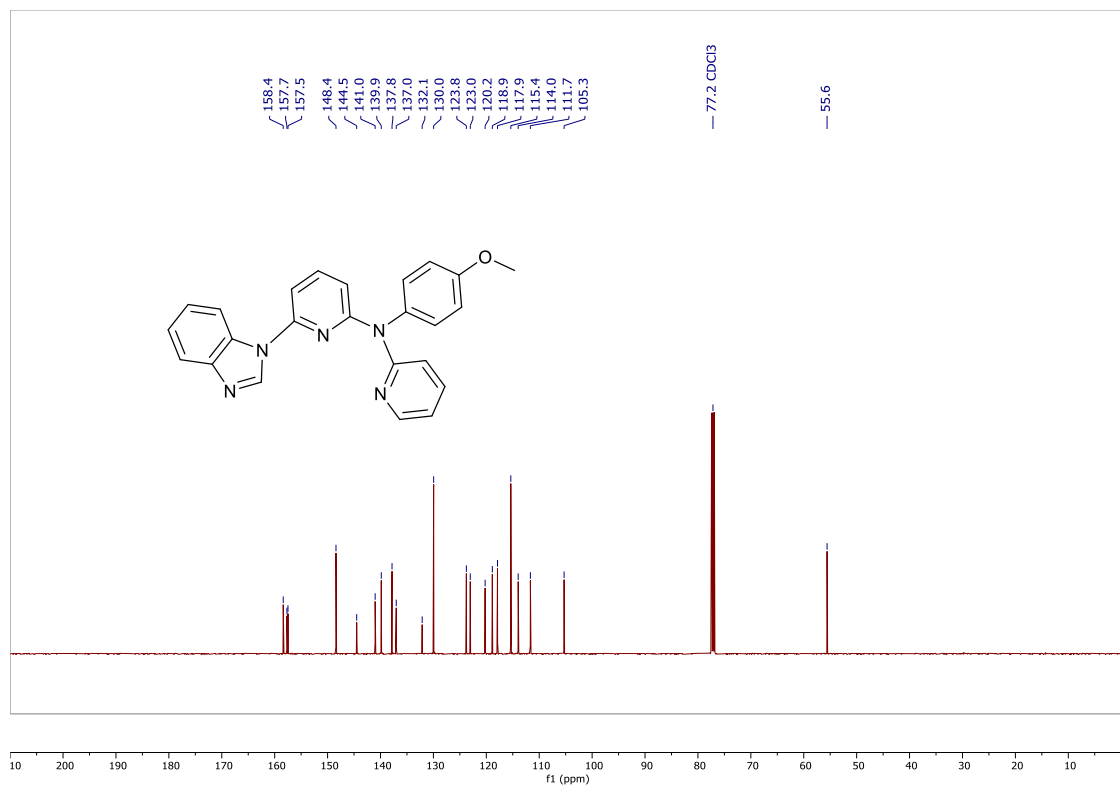

Figure S2. <sup>13</sup>C{<sup>1</sup>H} NMR of NN<sup>OMe</sup>C in CDCl<sub>3</sub>.

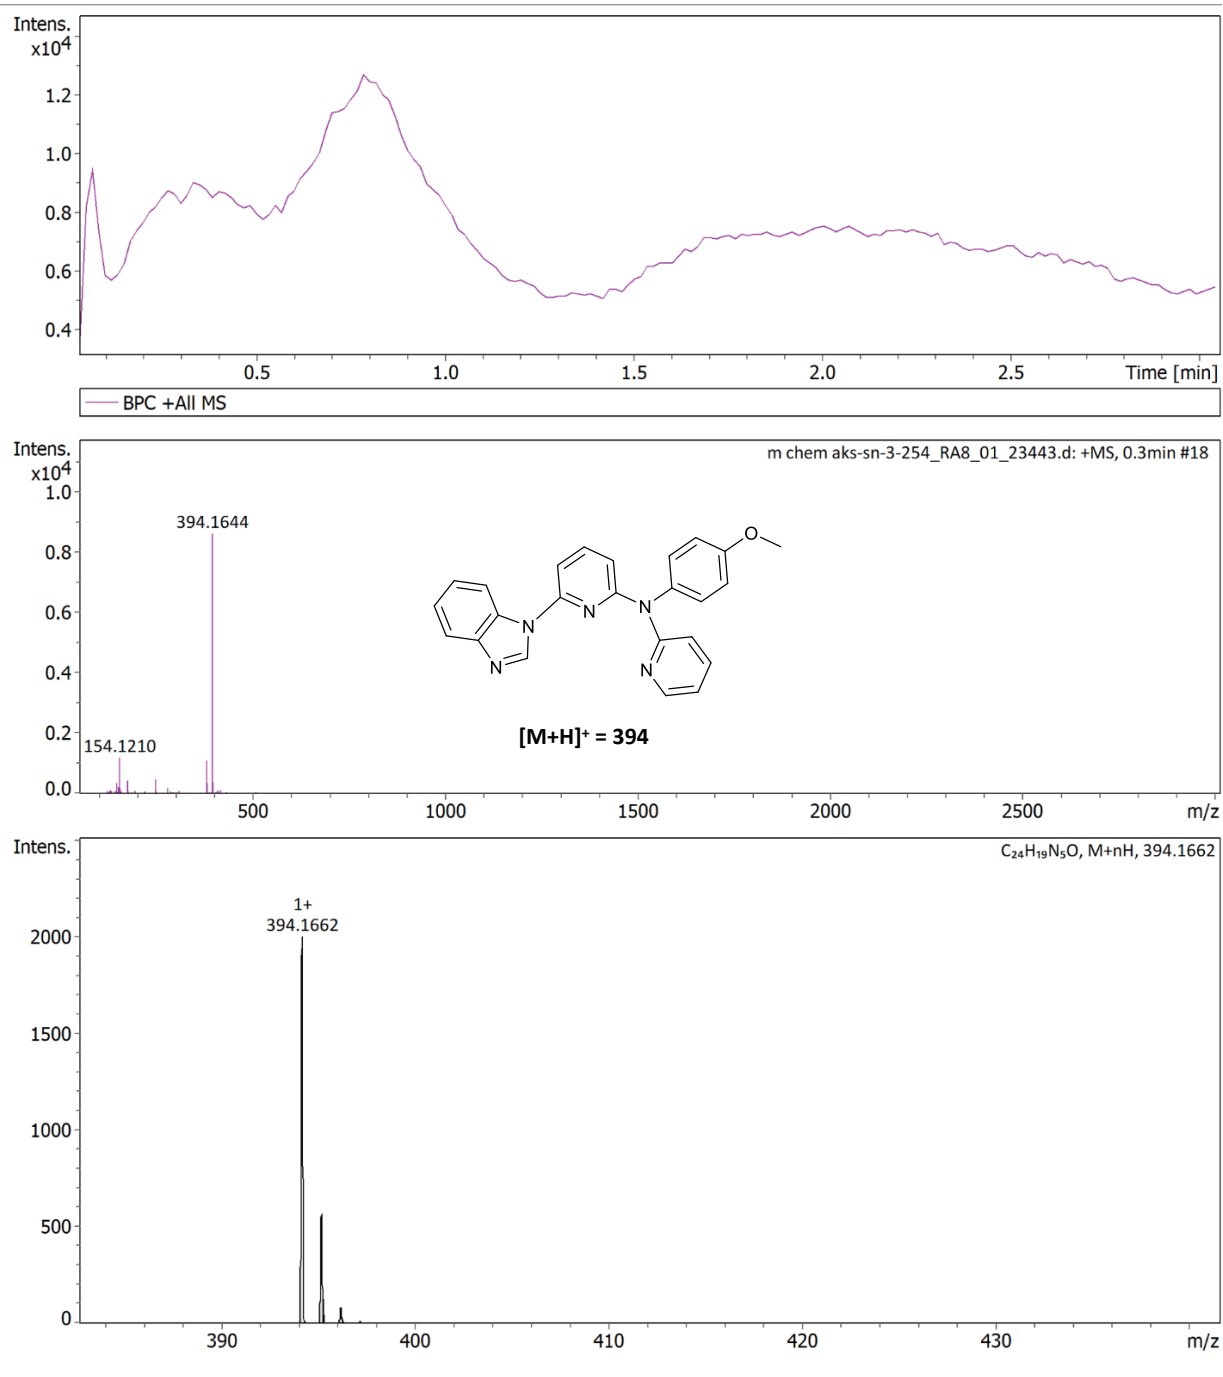

Figure S3. LCMS of NN<sup>OMe</sup>C.

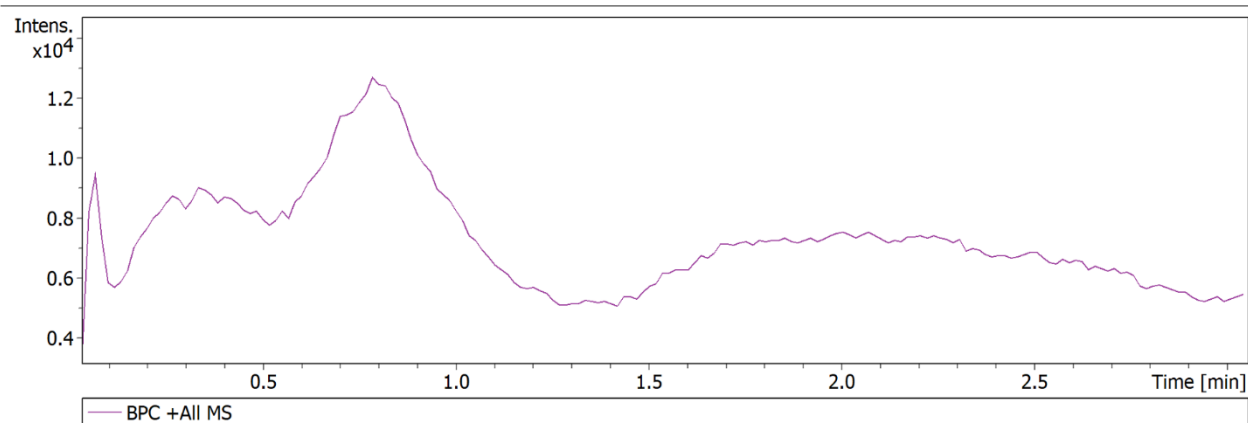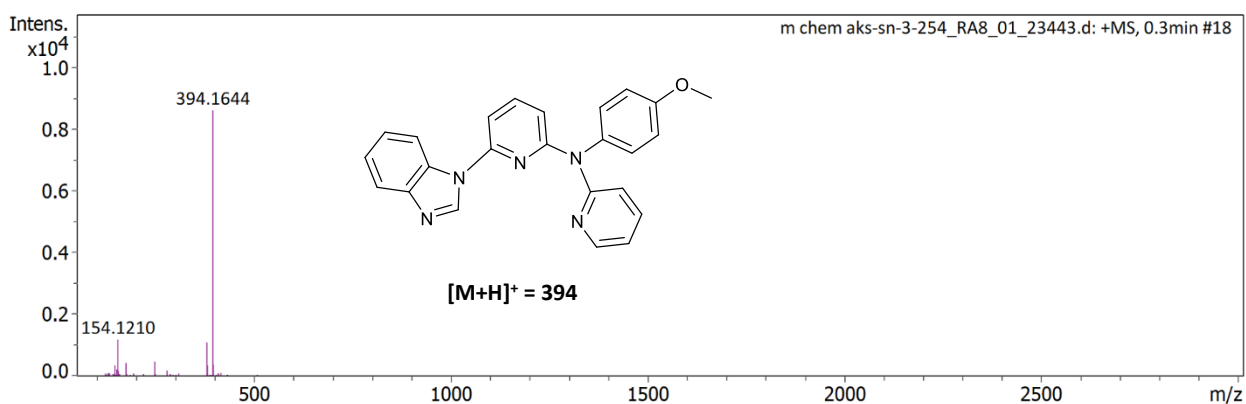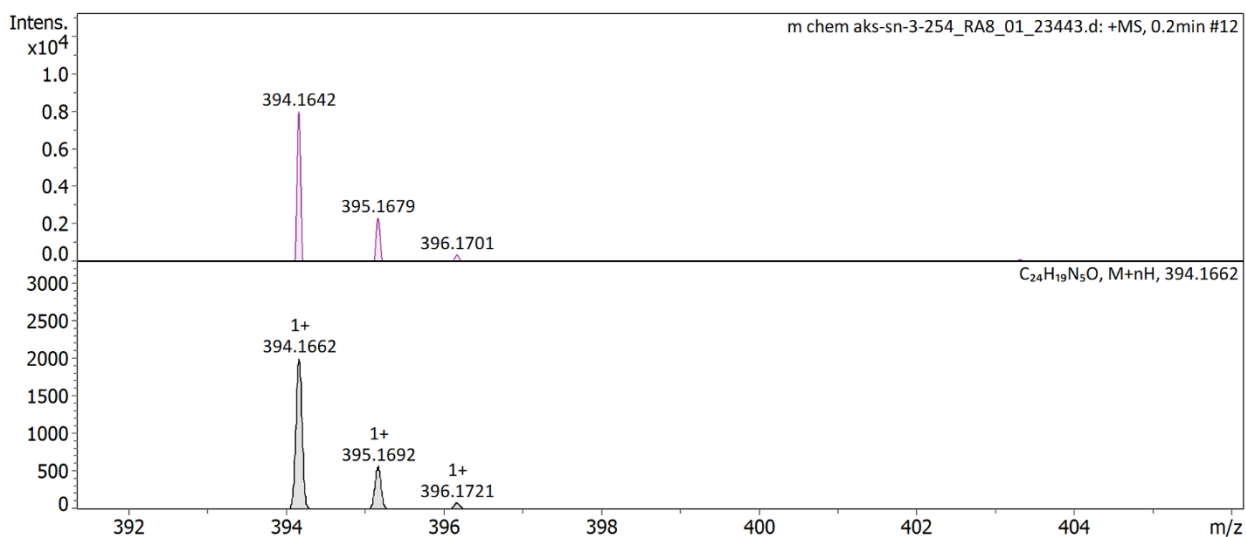

**Figure S4.** HRMS of NN<sup>OMe</sup>C.

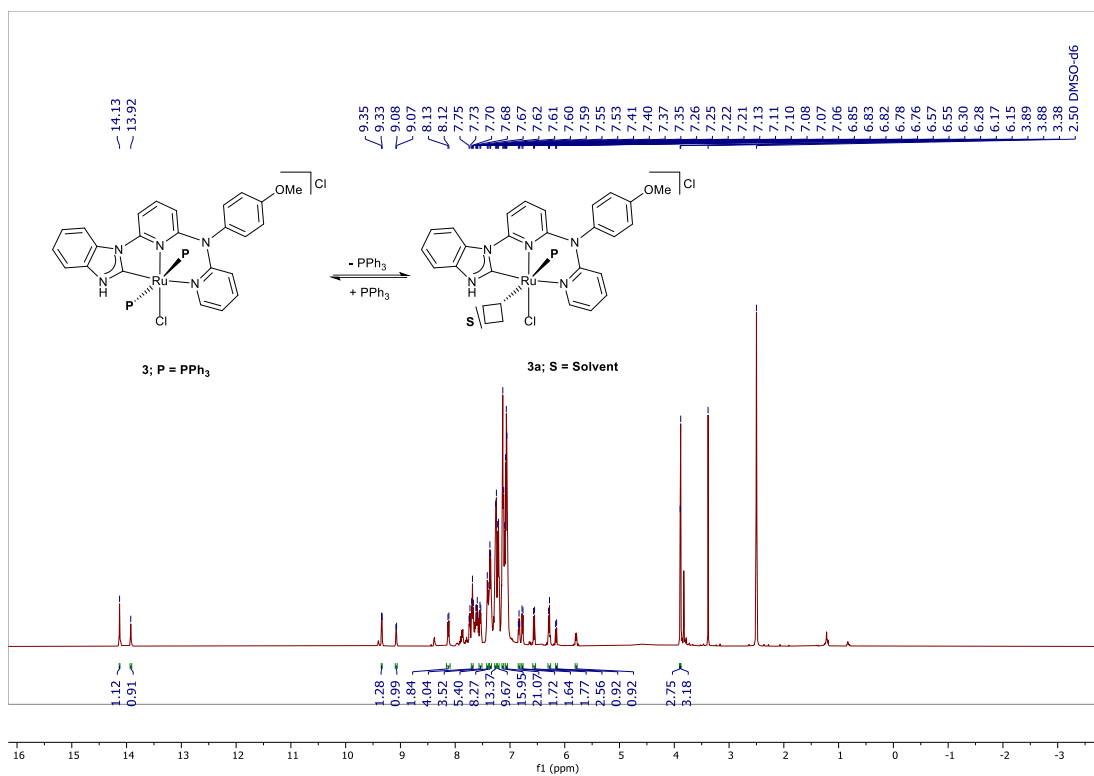

Figure S5. <sup>1</sup>H NMR spectrum of **3** in DMSO-d<sub>6</sub>.

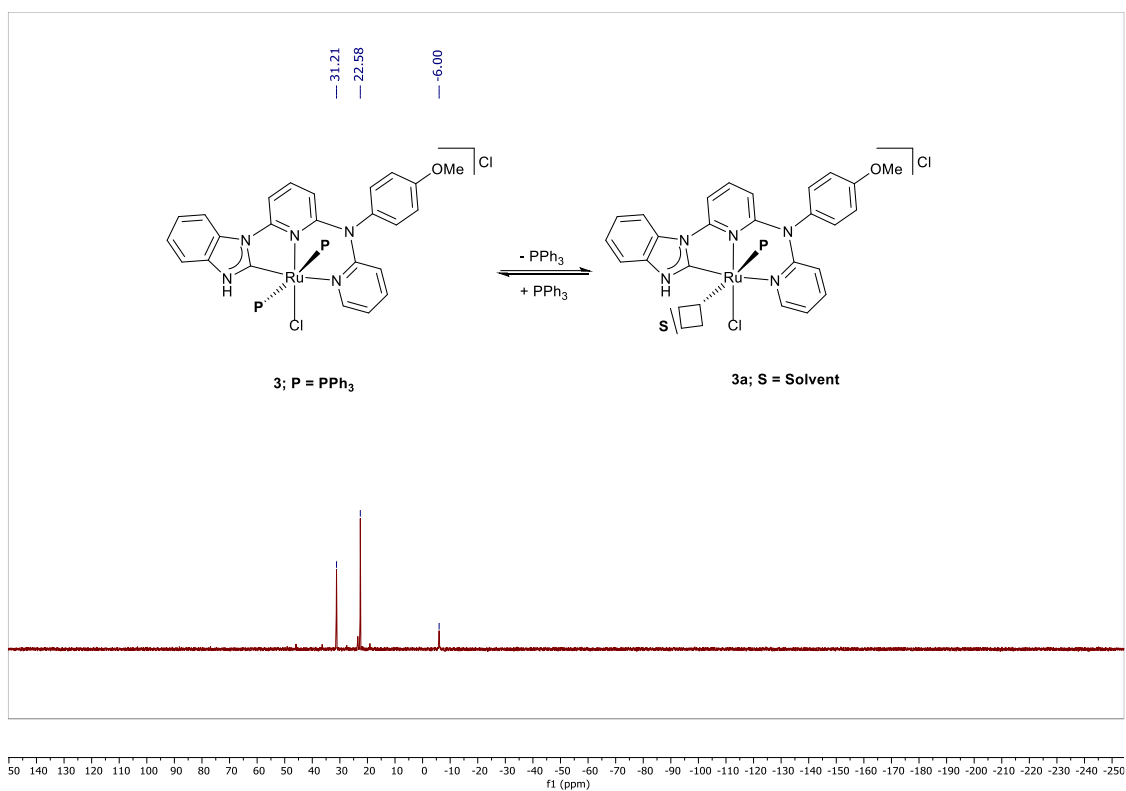

Figure S6. <sup>31</sup>P{<sup>1</sup>H} NMR spectrum of **3** in DMSO-d<sub>6</sub>.



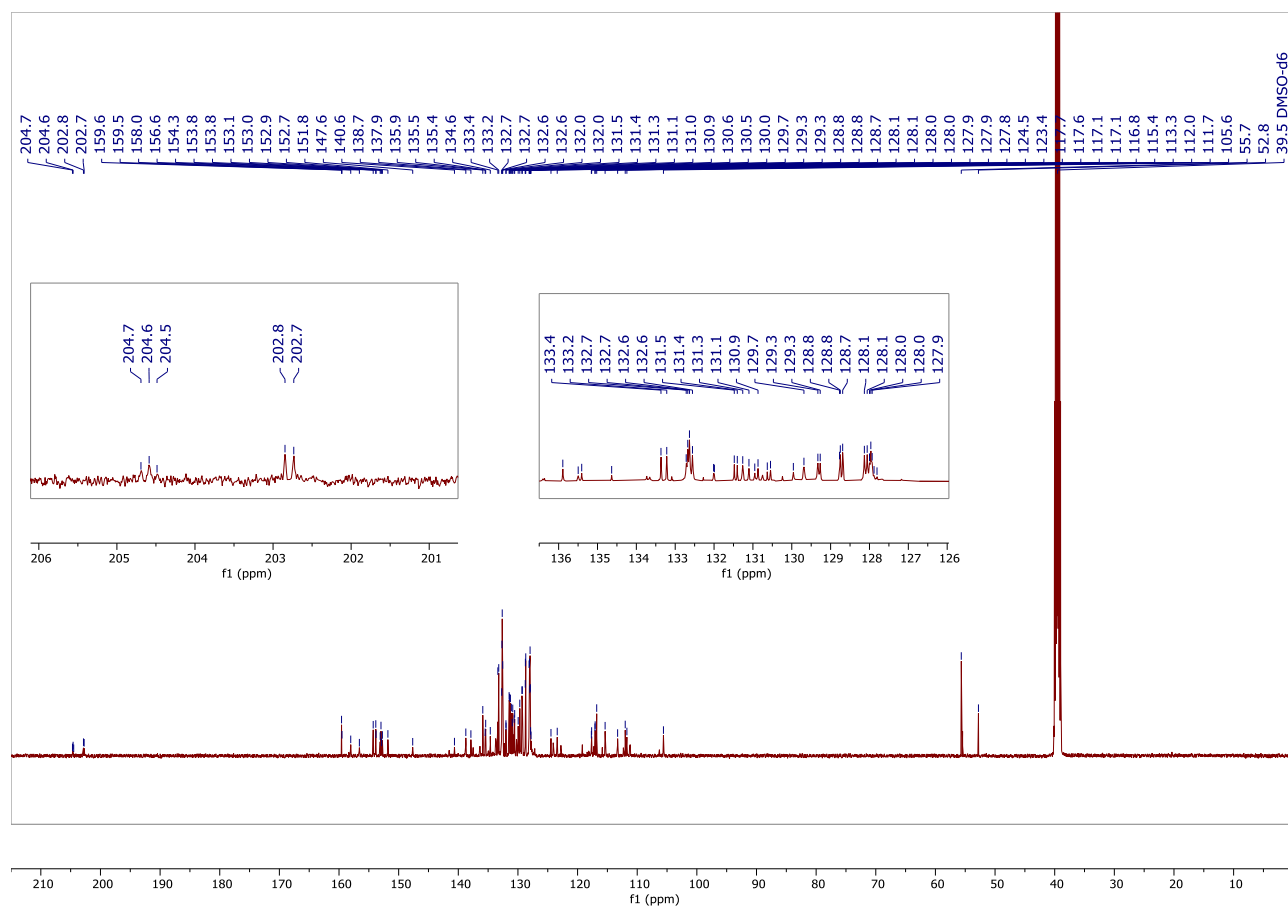

**Figure S7.**  $^{13}\text{C}\{^1\text{H}\}$  NMR spectrum of **3** in  $\text{DMSO-d}_6$ .

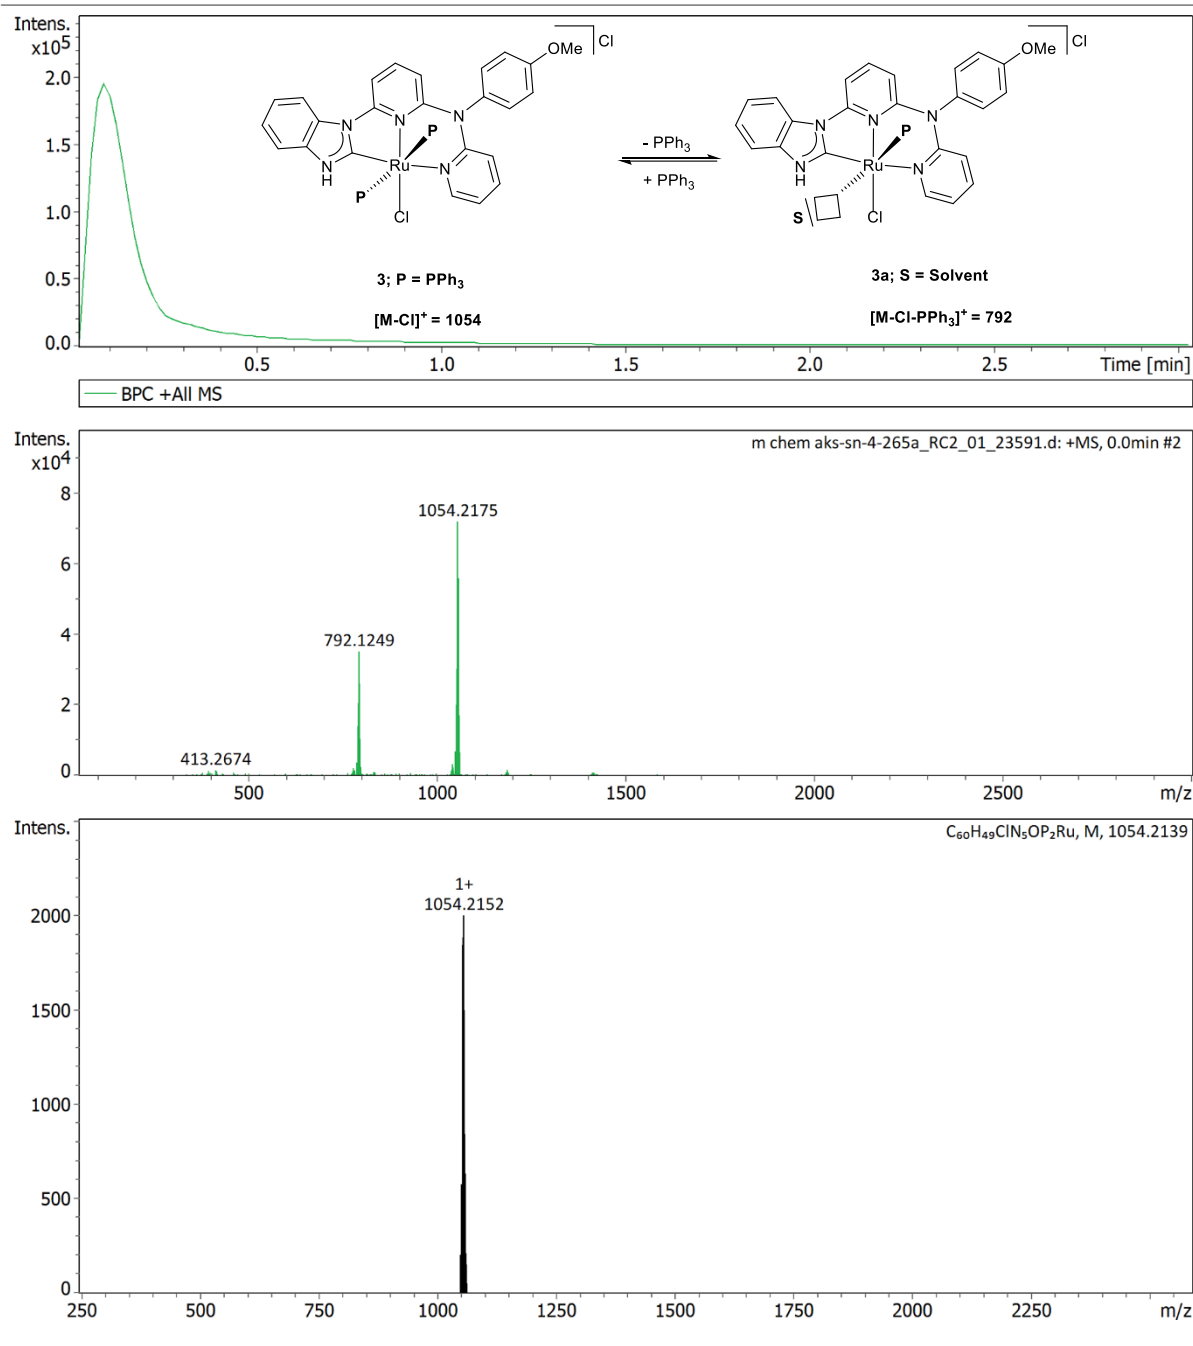

Figure S8. LCMS of **3**.

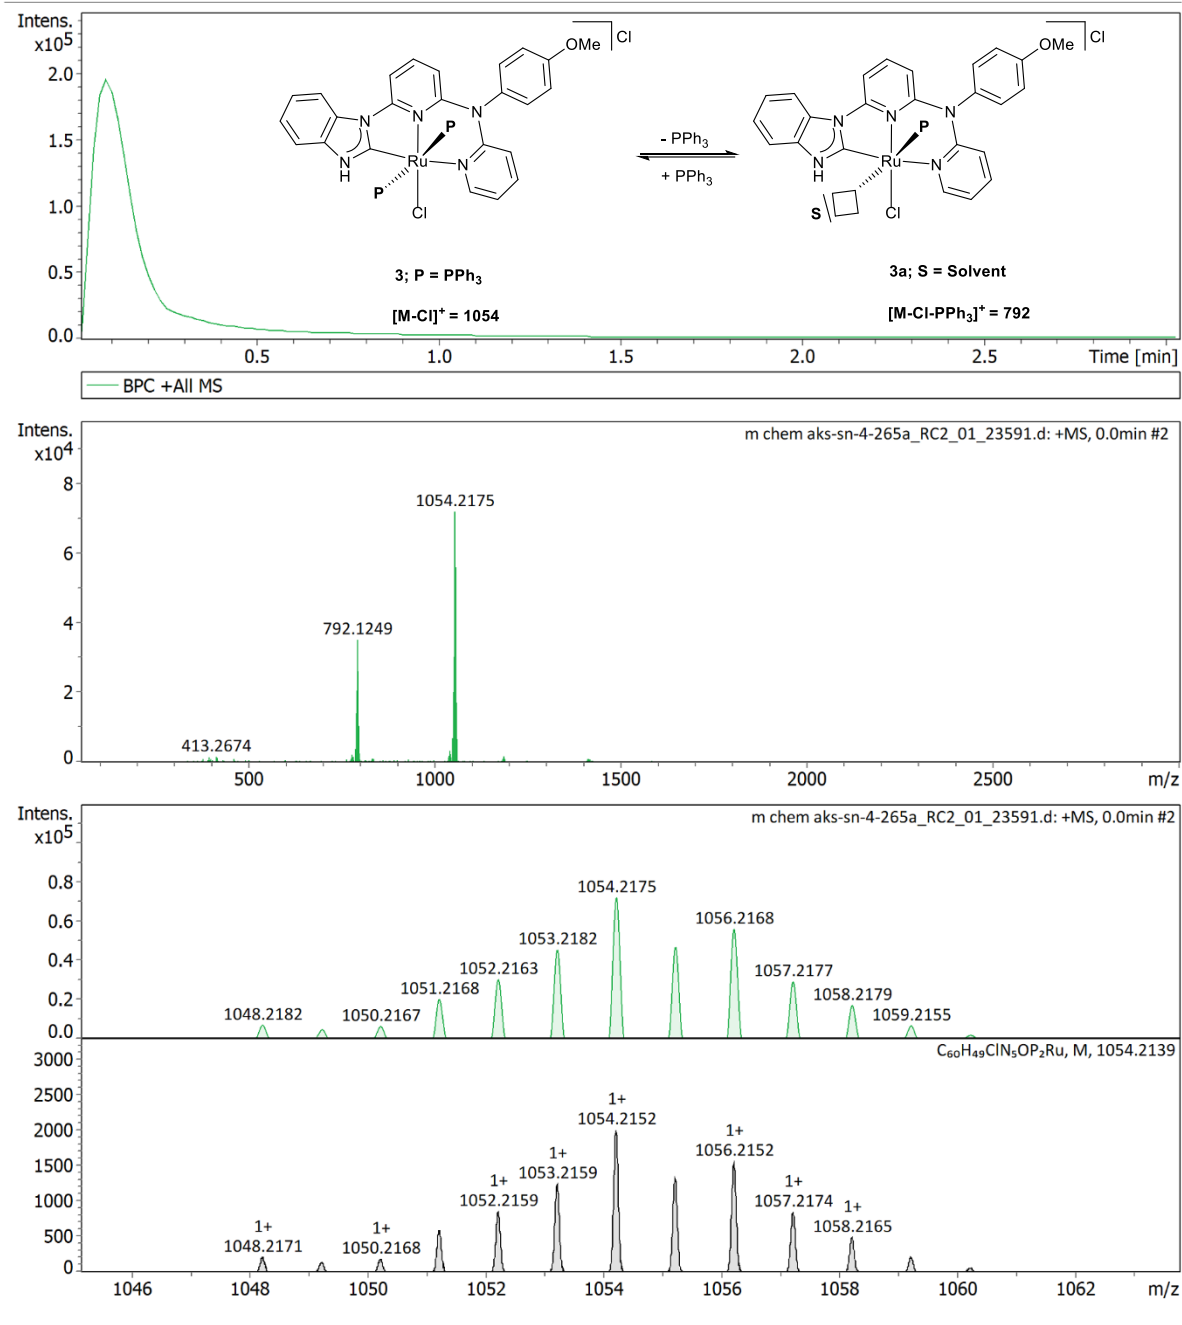

Figure S9. HRMS of 3.

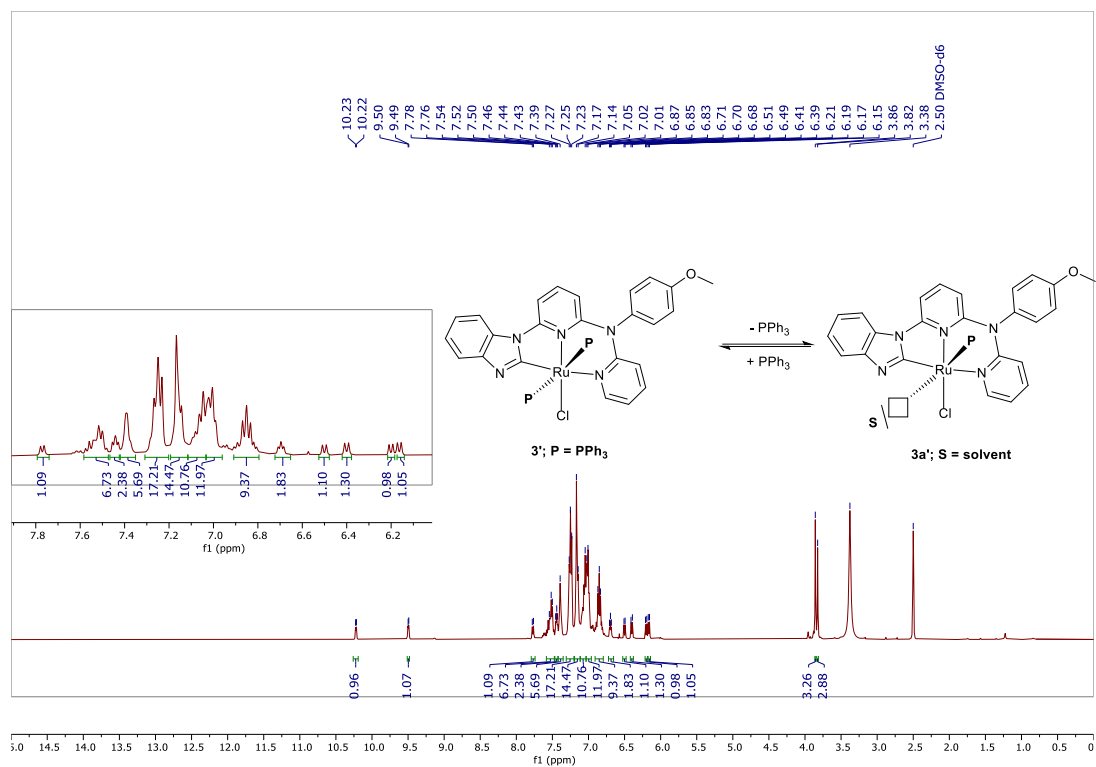

**Figure S10.  $^1\text{H}$  NMR spectrum of  $\mathbf{3}'$  in  $\text{DMSO-d}_6$ .**

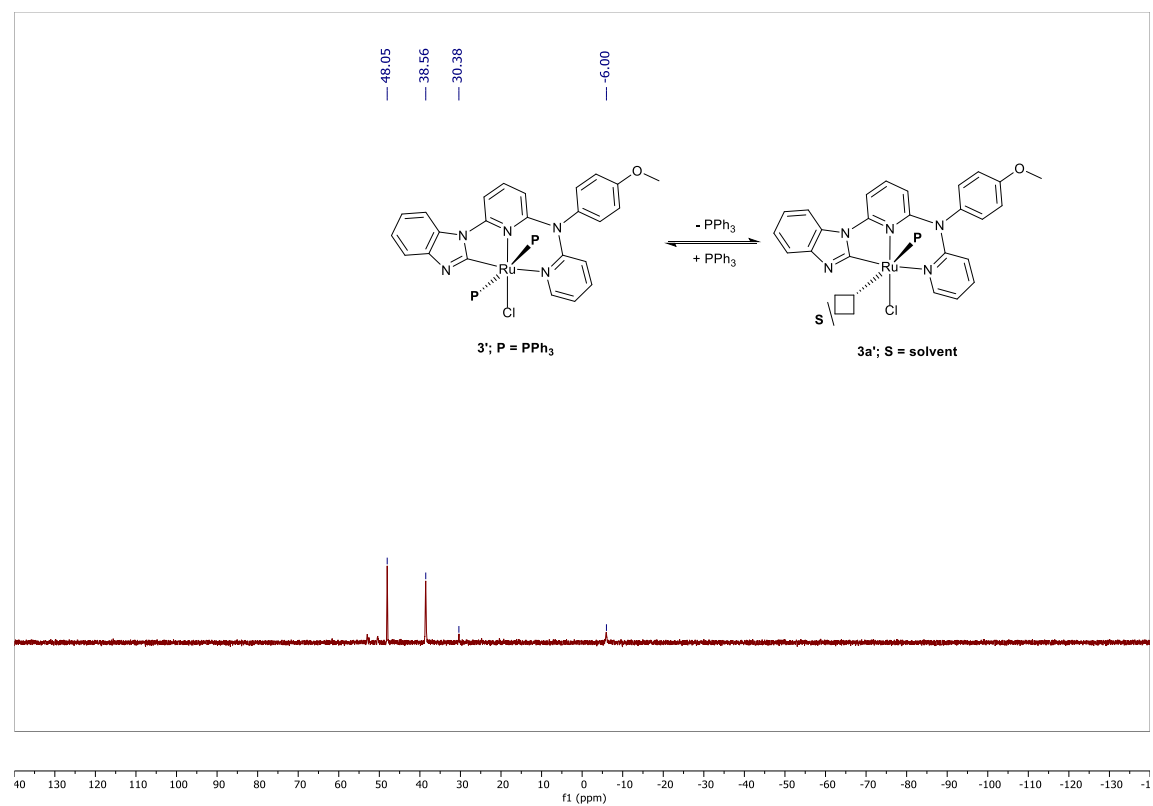

**Figure S11.  $^{31}\text{P}\{^1\text{H}\}$  NMR spectrum of  $\mathbf{3}'$  in  $\text{DMSO-d}_6$ .**

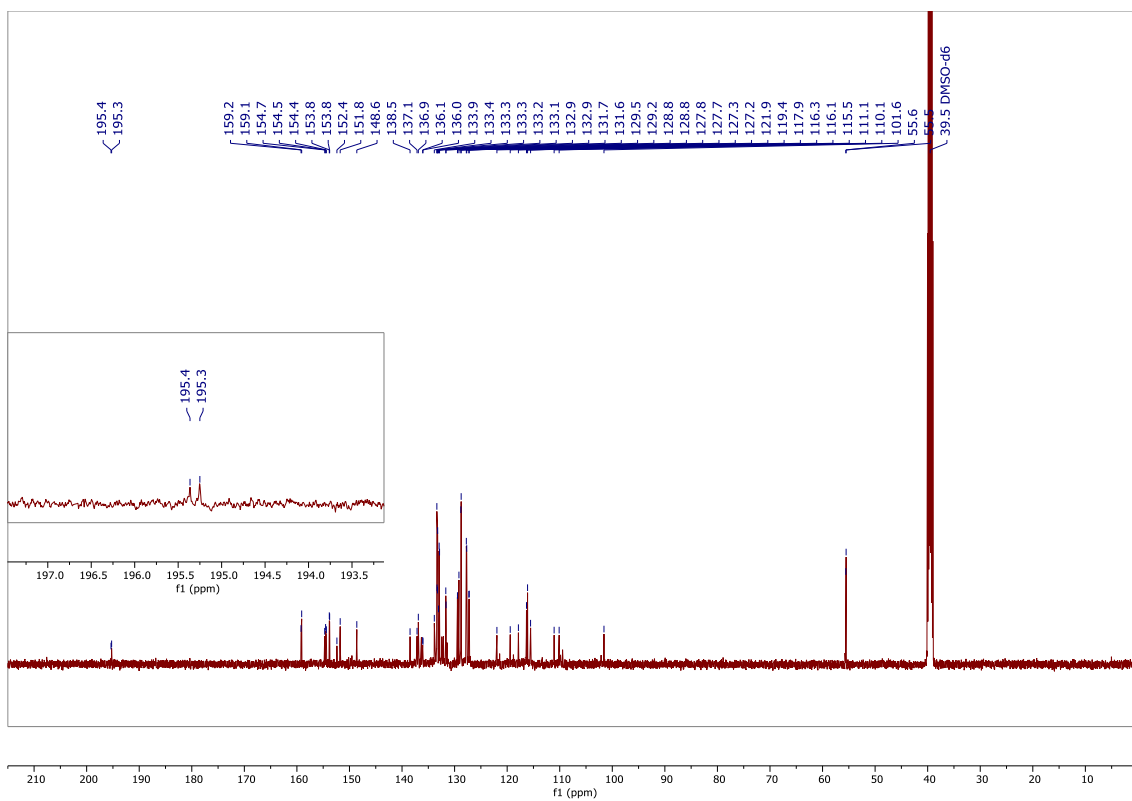

Figure S12.  $^{13}\text{C}\{^1\text{H}\}$  NMR spectrum of **3'** in  $\text{DMSO-d}_6$ .

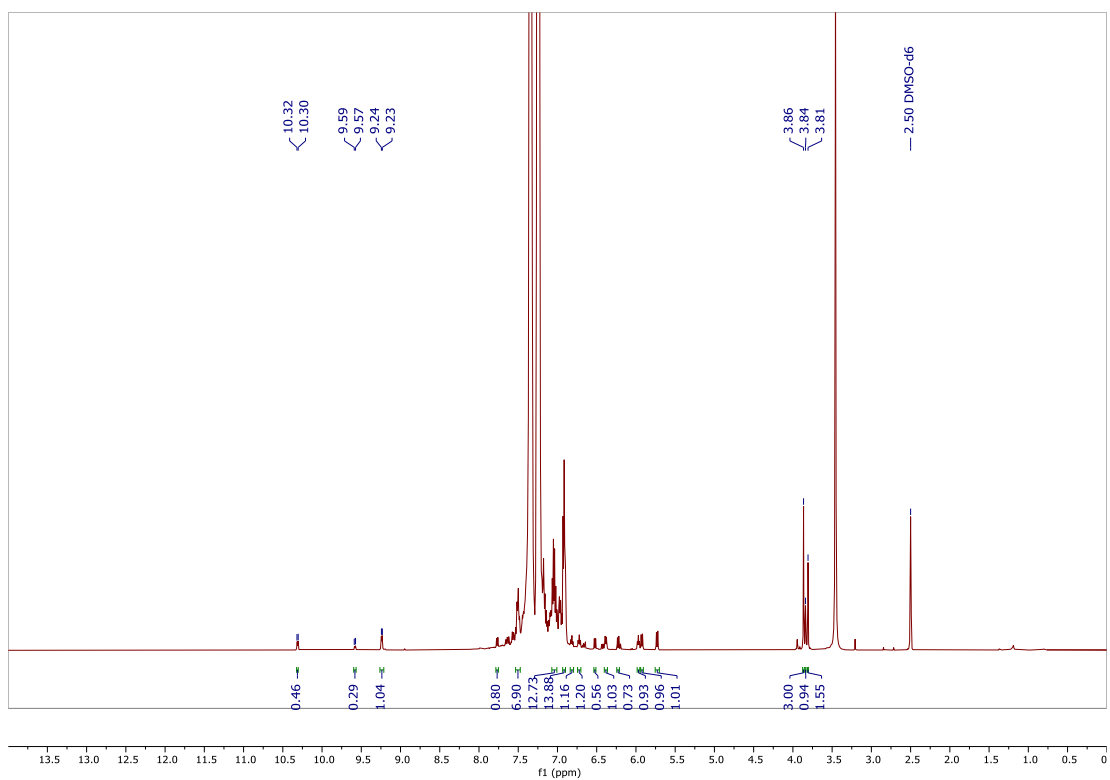

Figure S13.  $^1\text{H}$  NMR spectrum of **3'** after adding 10 equiv. of  $\text{PPh}_3$ .

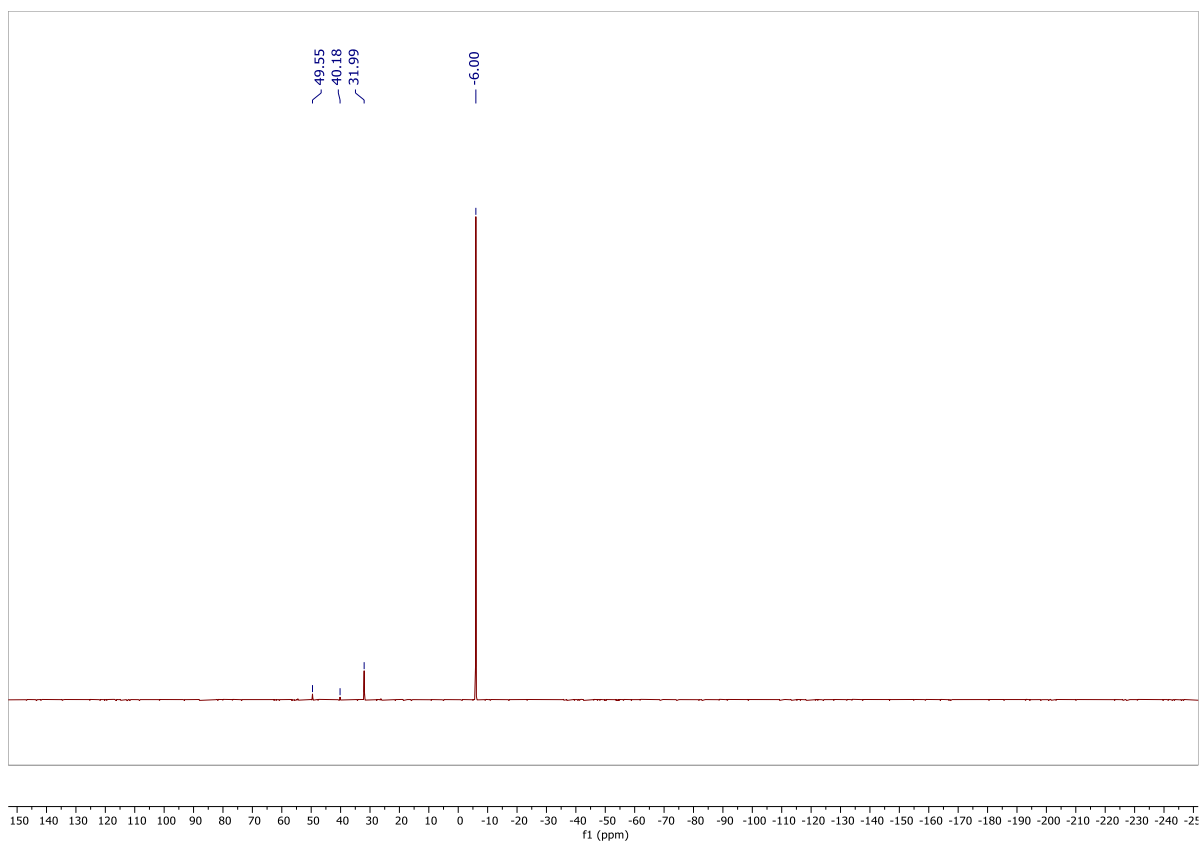

**Figure S14.**  $^{31}\text{P}\{^1\text{H}\}$  NMR spectrum of **3'** after adding 10 equiv. of  $\text{PPh}_3$ .

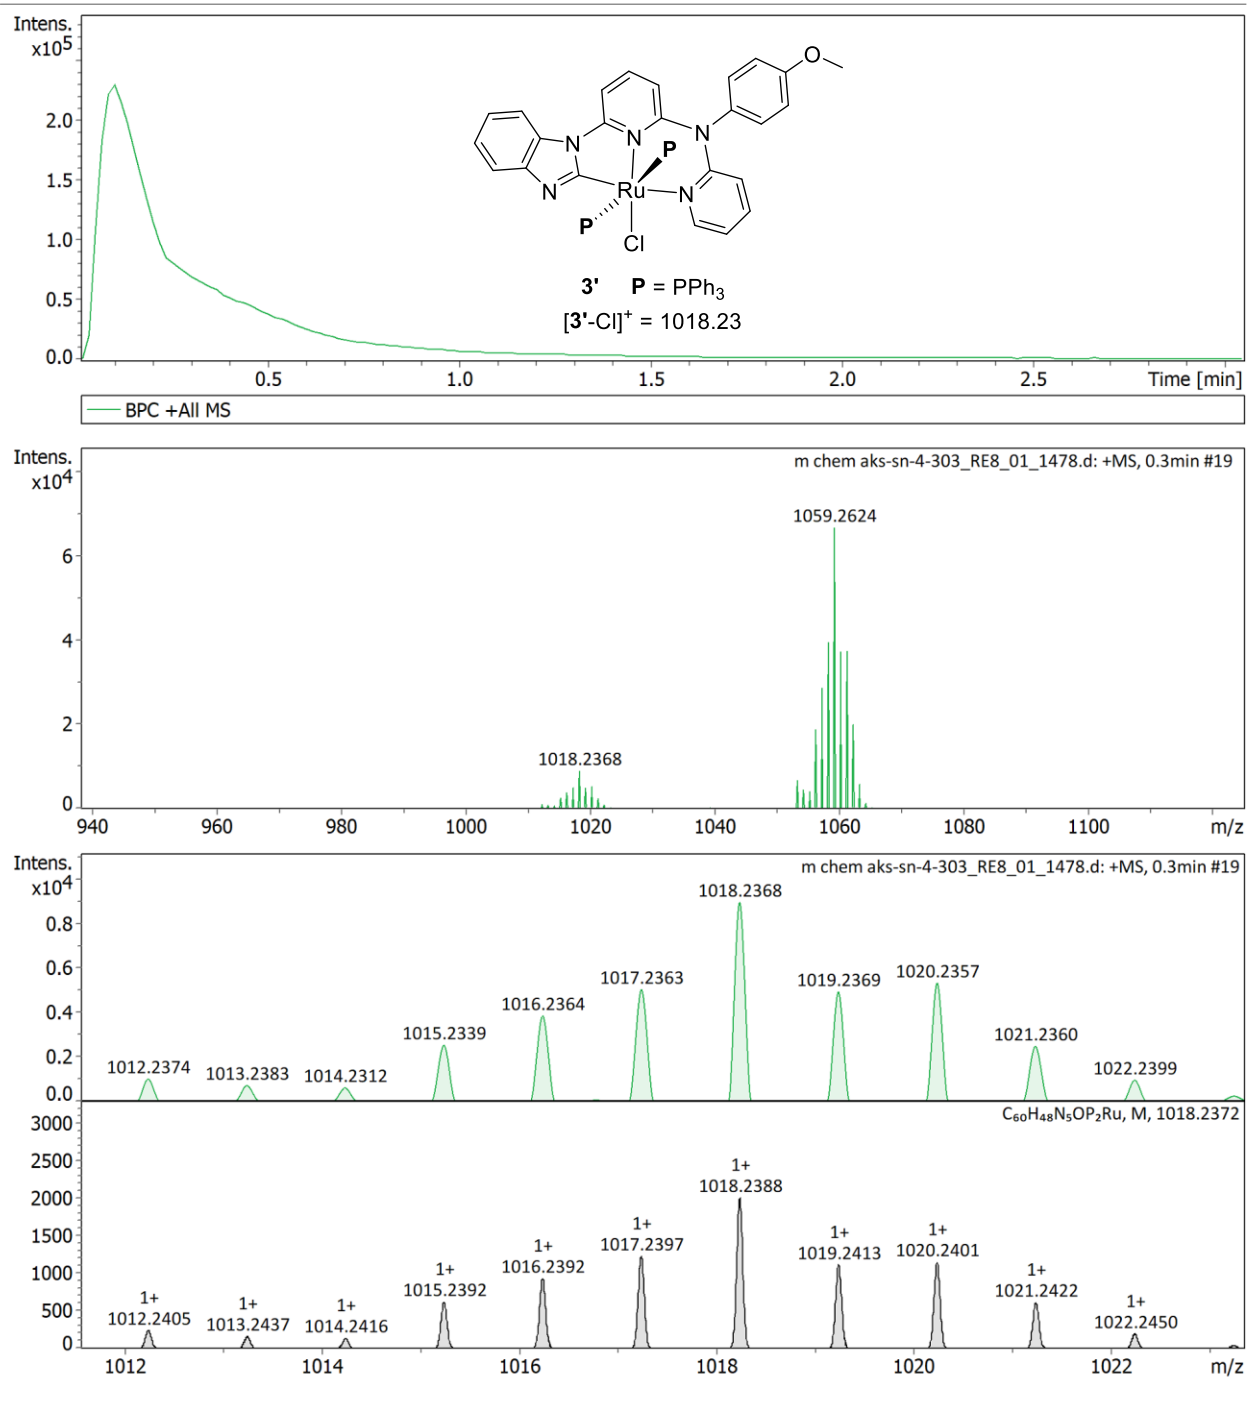

Figure S15. HRMS of 3'.

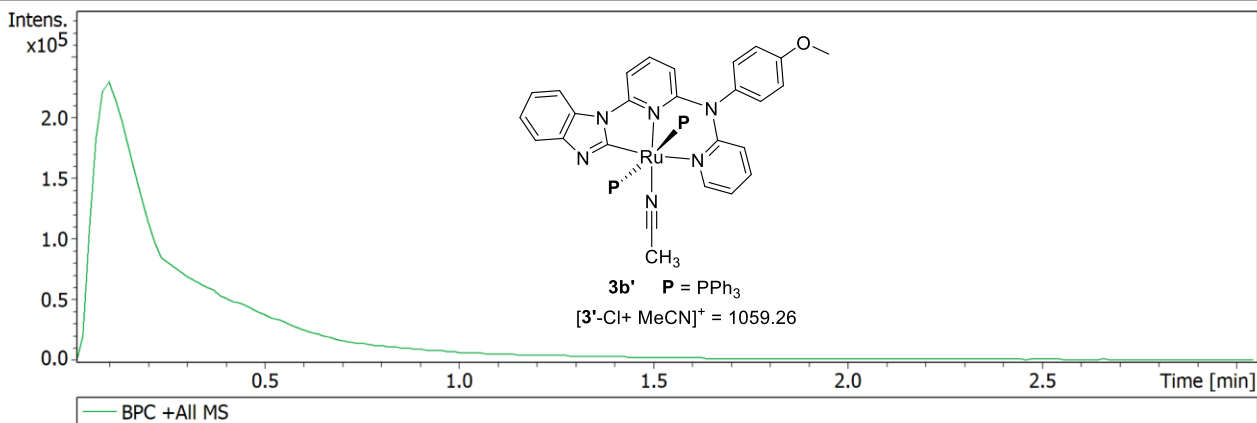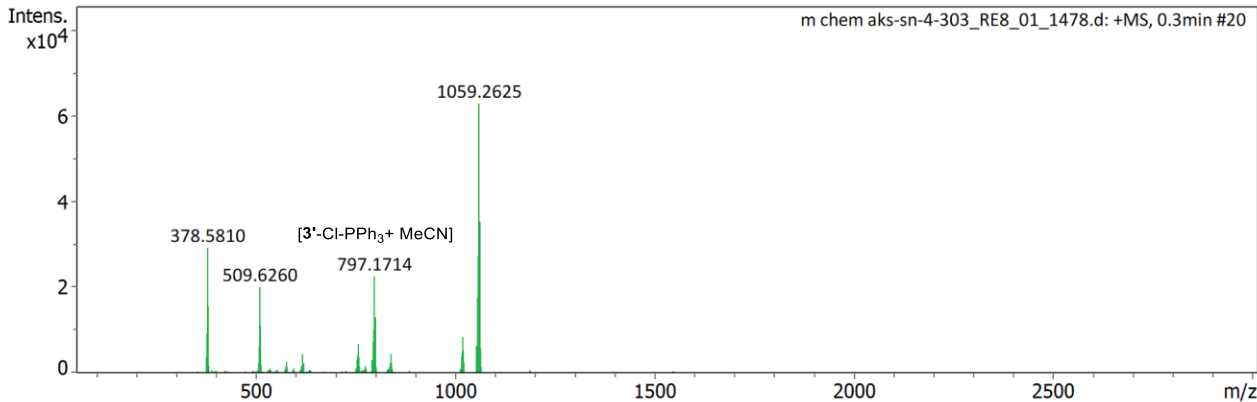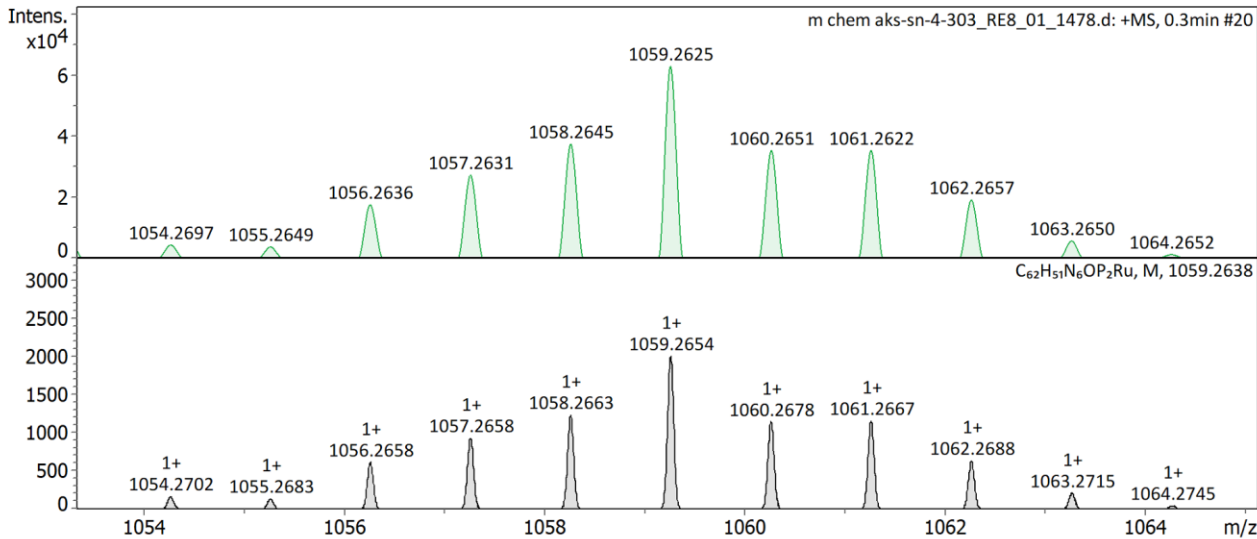

Figure S16. HRMS of 3b'.



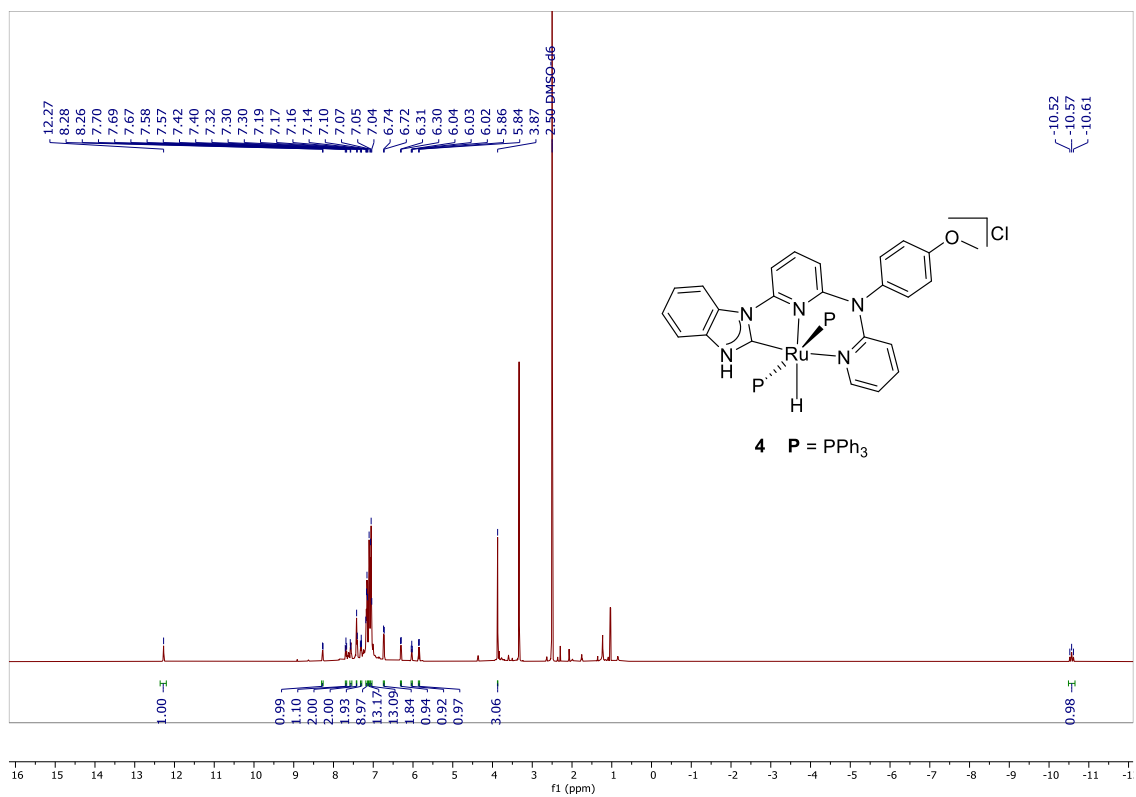

**Figure S17.**  $^1\text{H}$  NMR spectrum of **4** in  $\text{DMSO-d}_6$ .

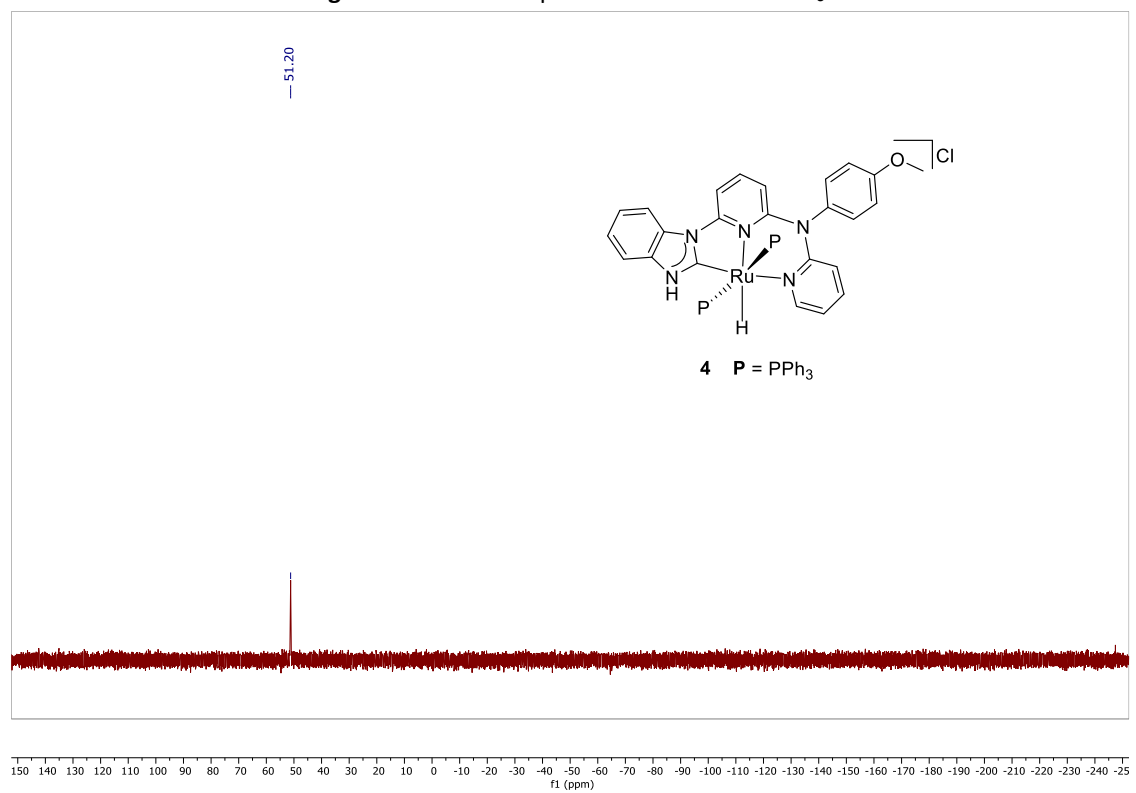

**Figure S18.**  $^{31}\text{P}\{^1\text{H}\}$  NMR spectrum of **4** in  $\text{DMSO-d}_6$ .

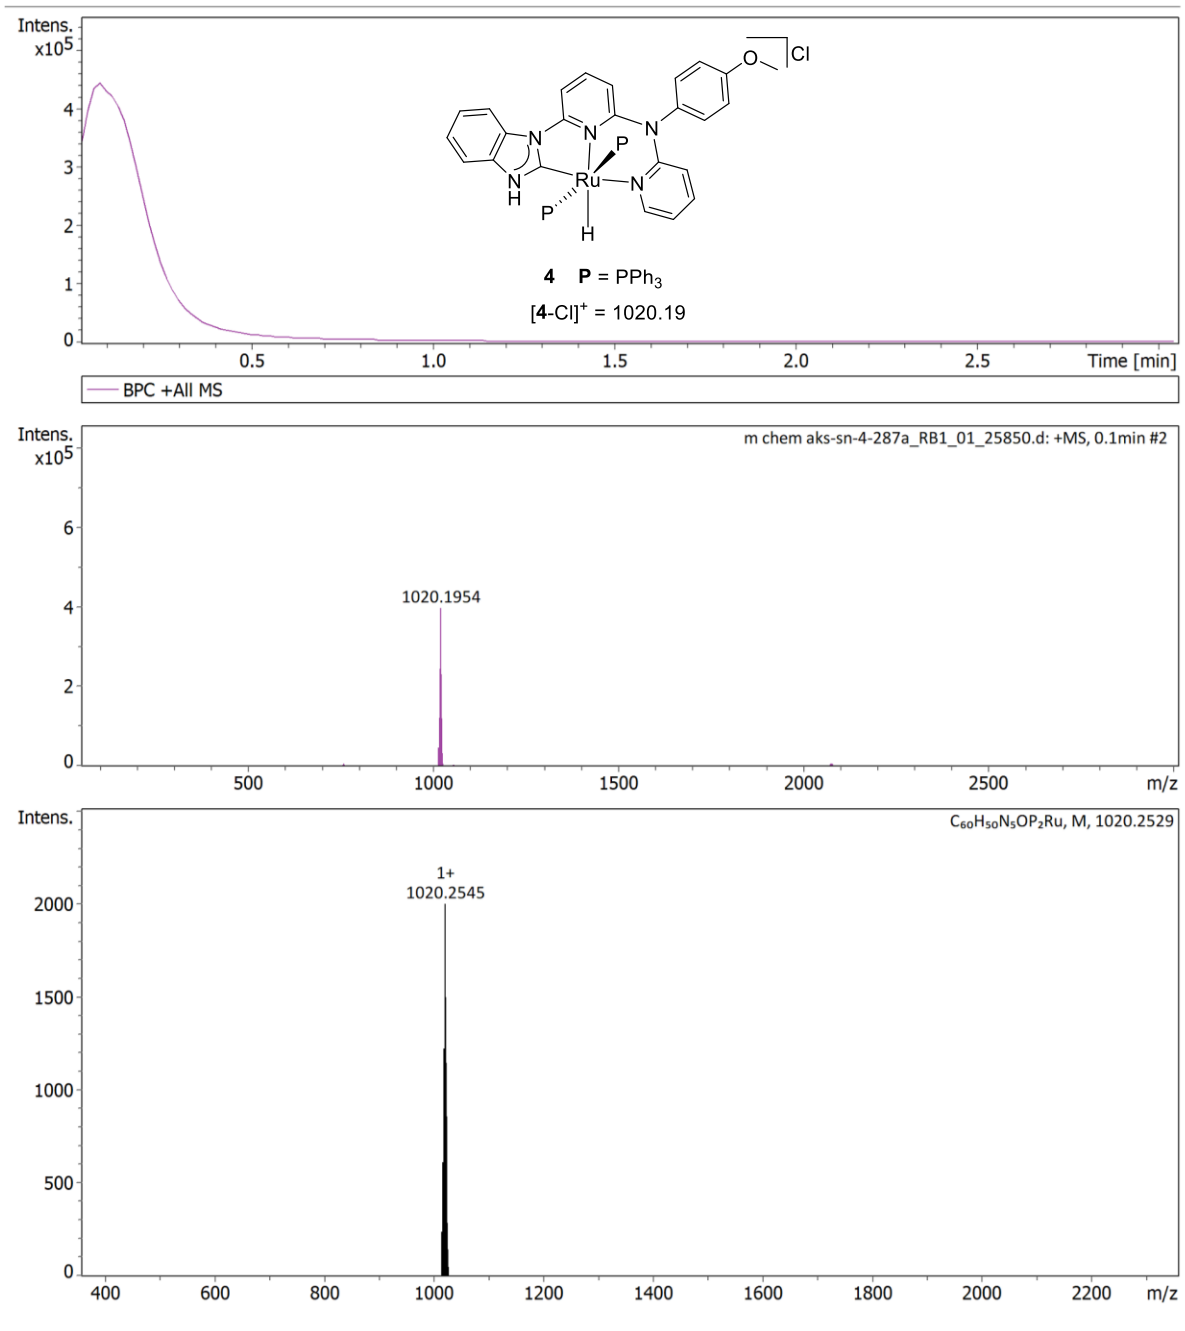

Figure S19 LCMS of 4.

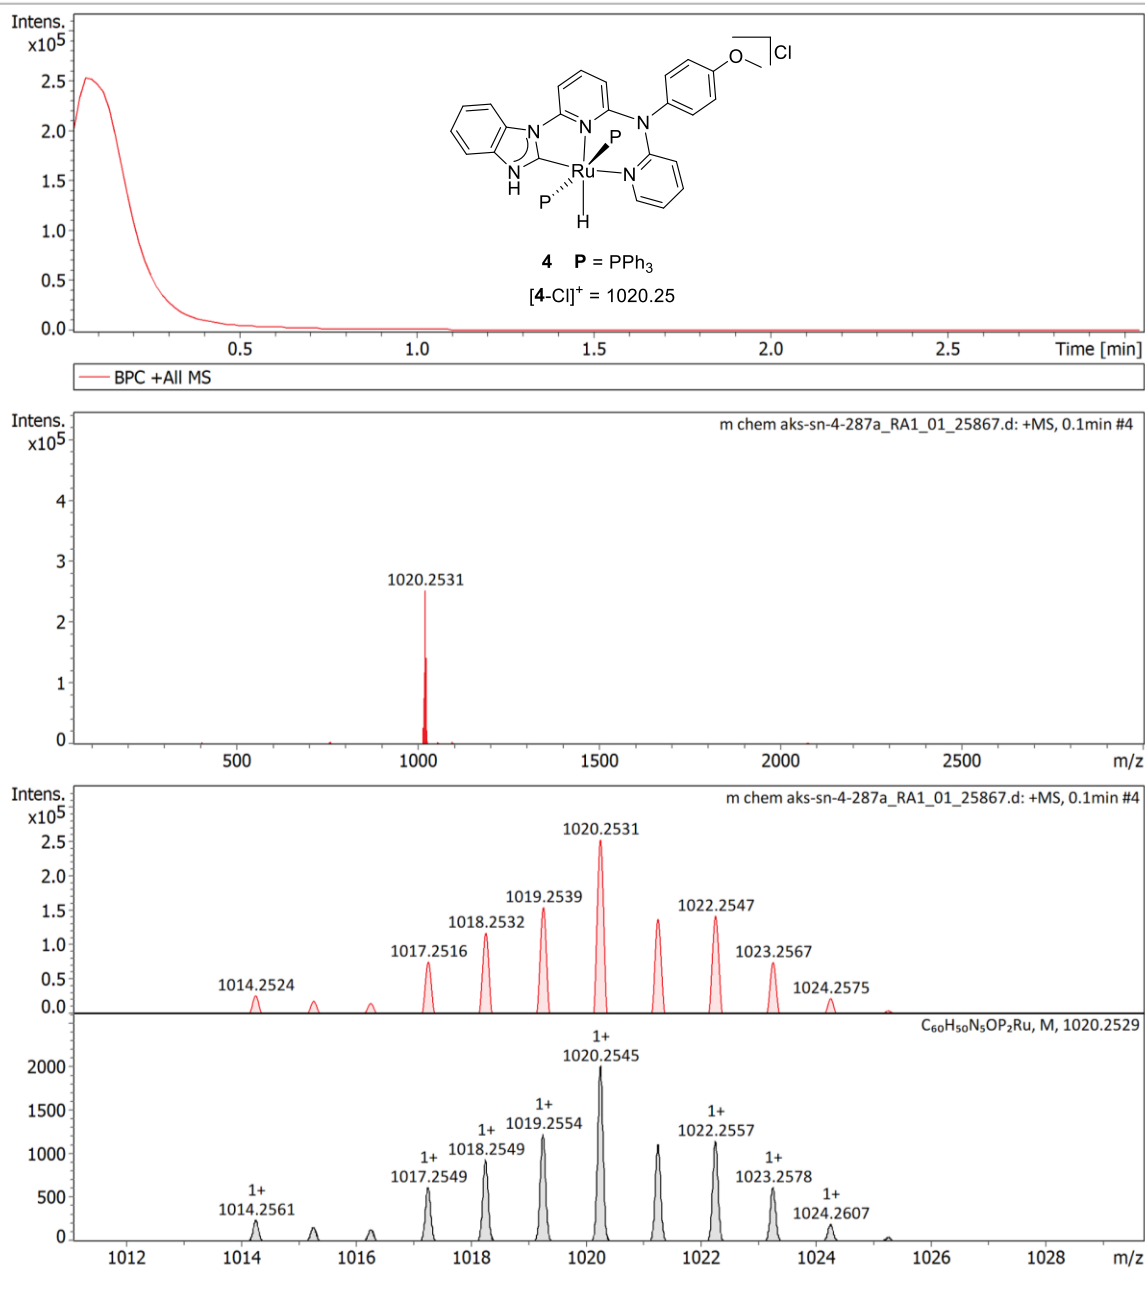

Figure S20. HRMS of 4.

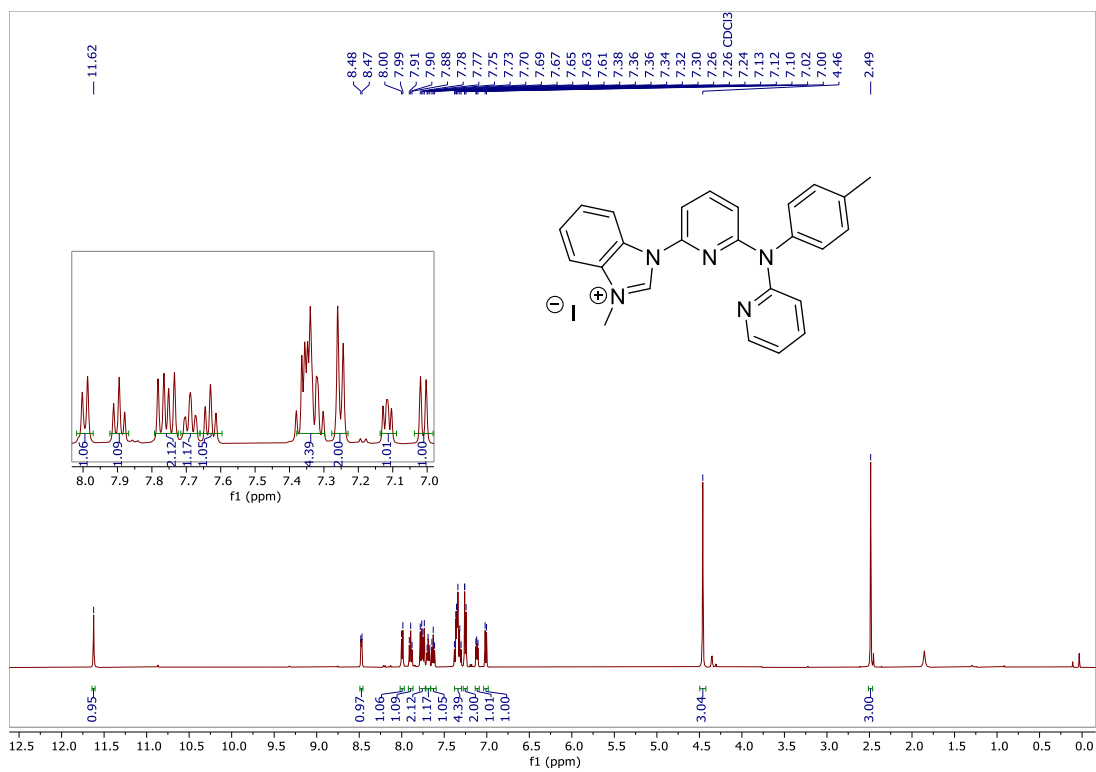

Figure S21.  $^1\text{H}$  NMR spectrum of  $\text{NN}^{\text{Me}}\text{C}^{\text{Me}}\cdot\text{HI}$  in  $\text{CDCl}_3$ .

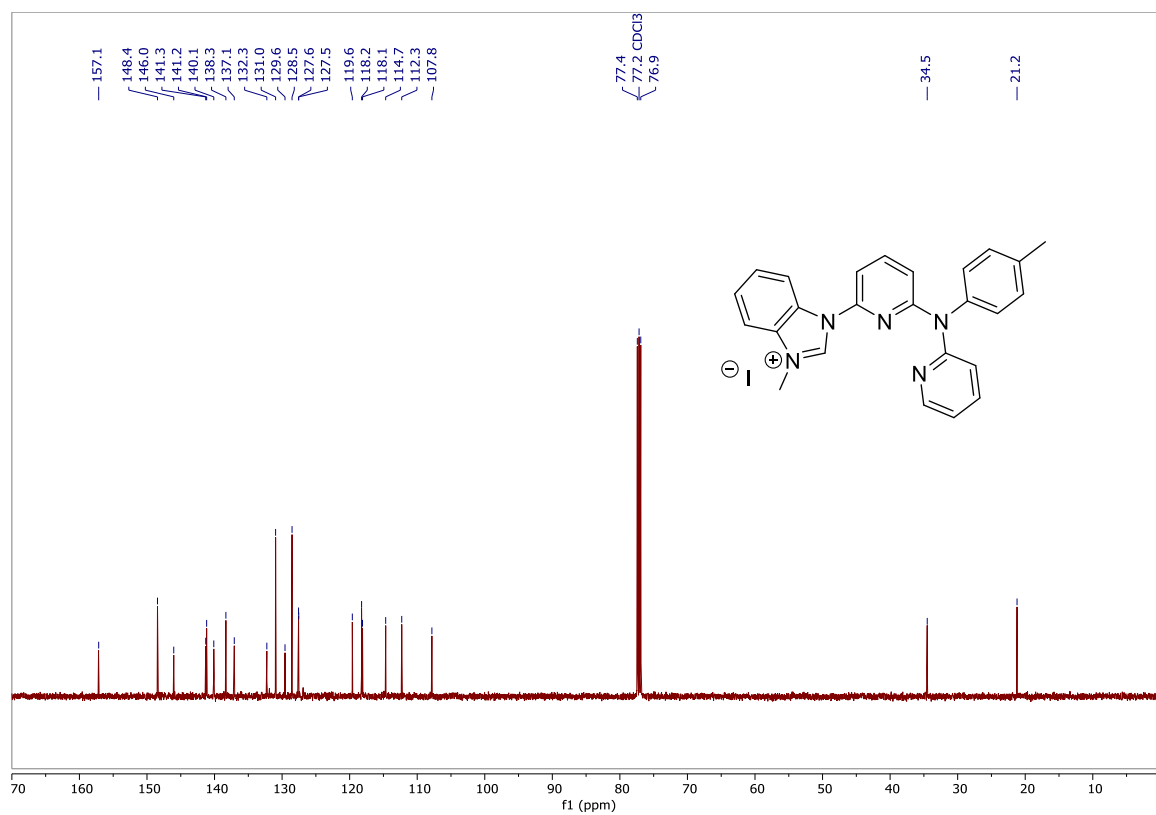

Figure S22.  $^{13}\text{C}\{^1\text{H}\}$  NMR spectrum of ligand  $\text{NN}^{\text{Me}}\text{C}^{\text{Me}}\cdot\text{HI}$  in  $\text{CDCl}_3$ .

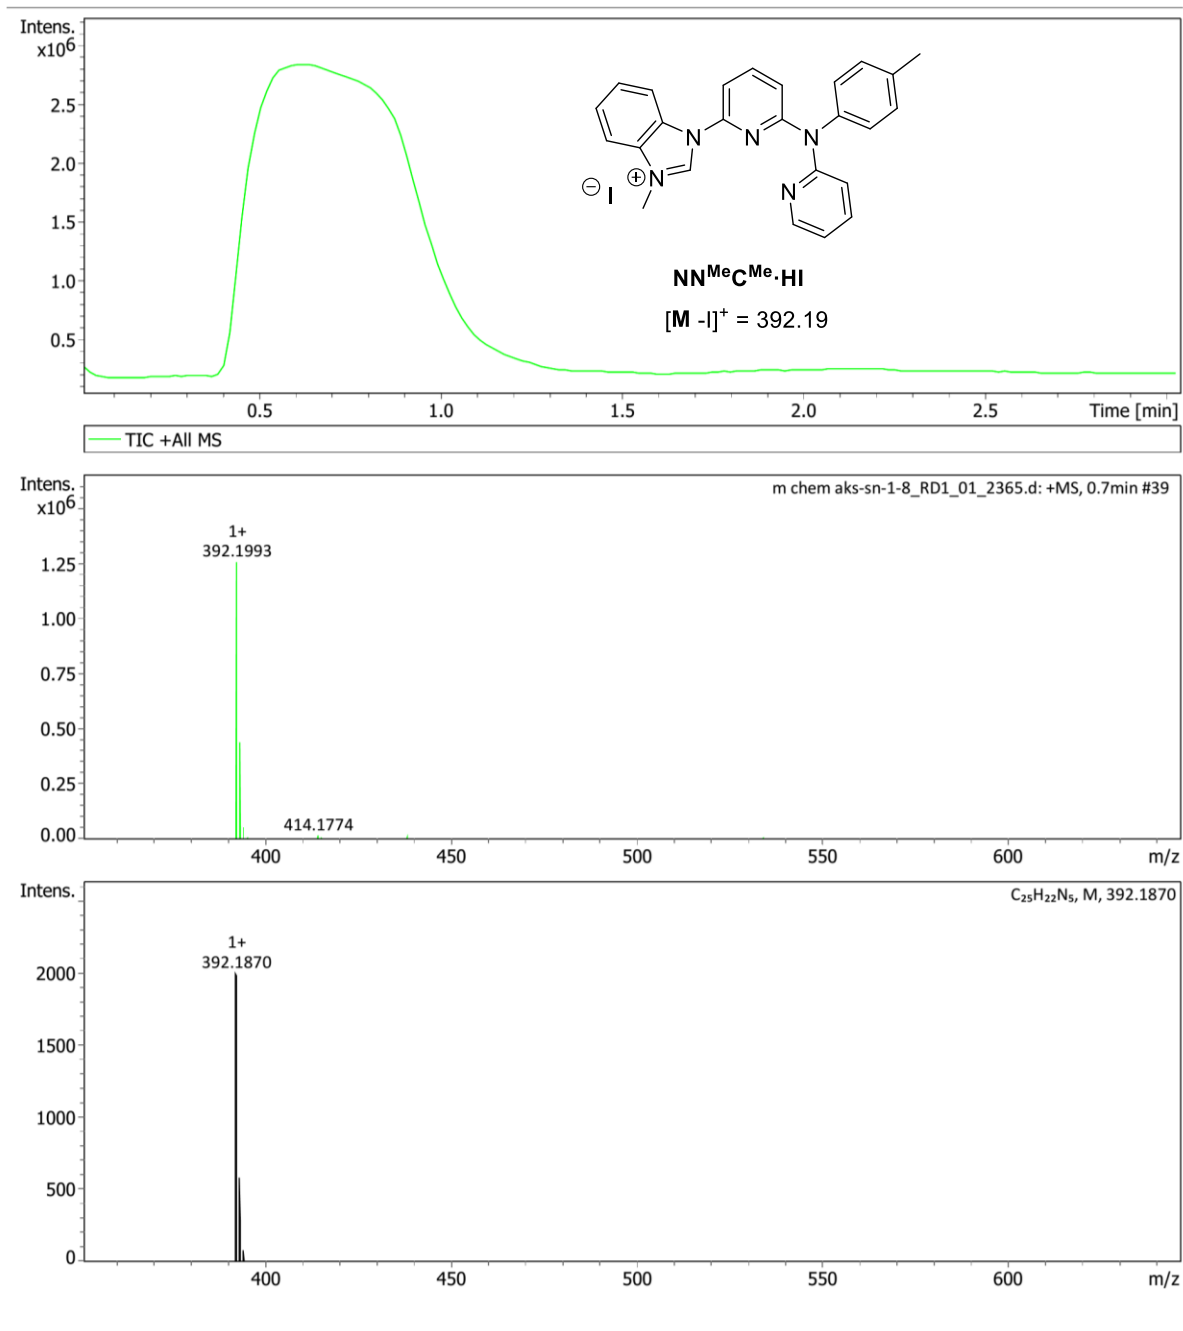

Figure S23. LC-MS of NN<sup>Me</sup>C<sup>Me</sup>.HI.

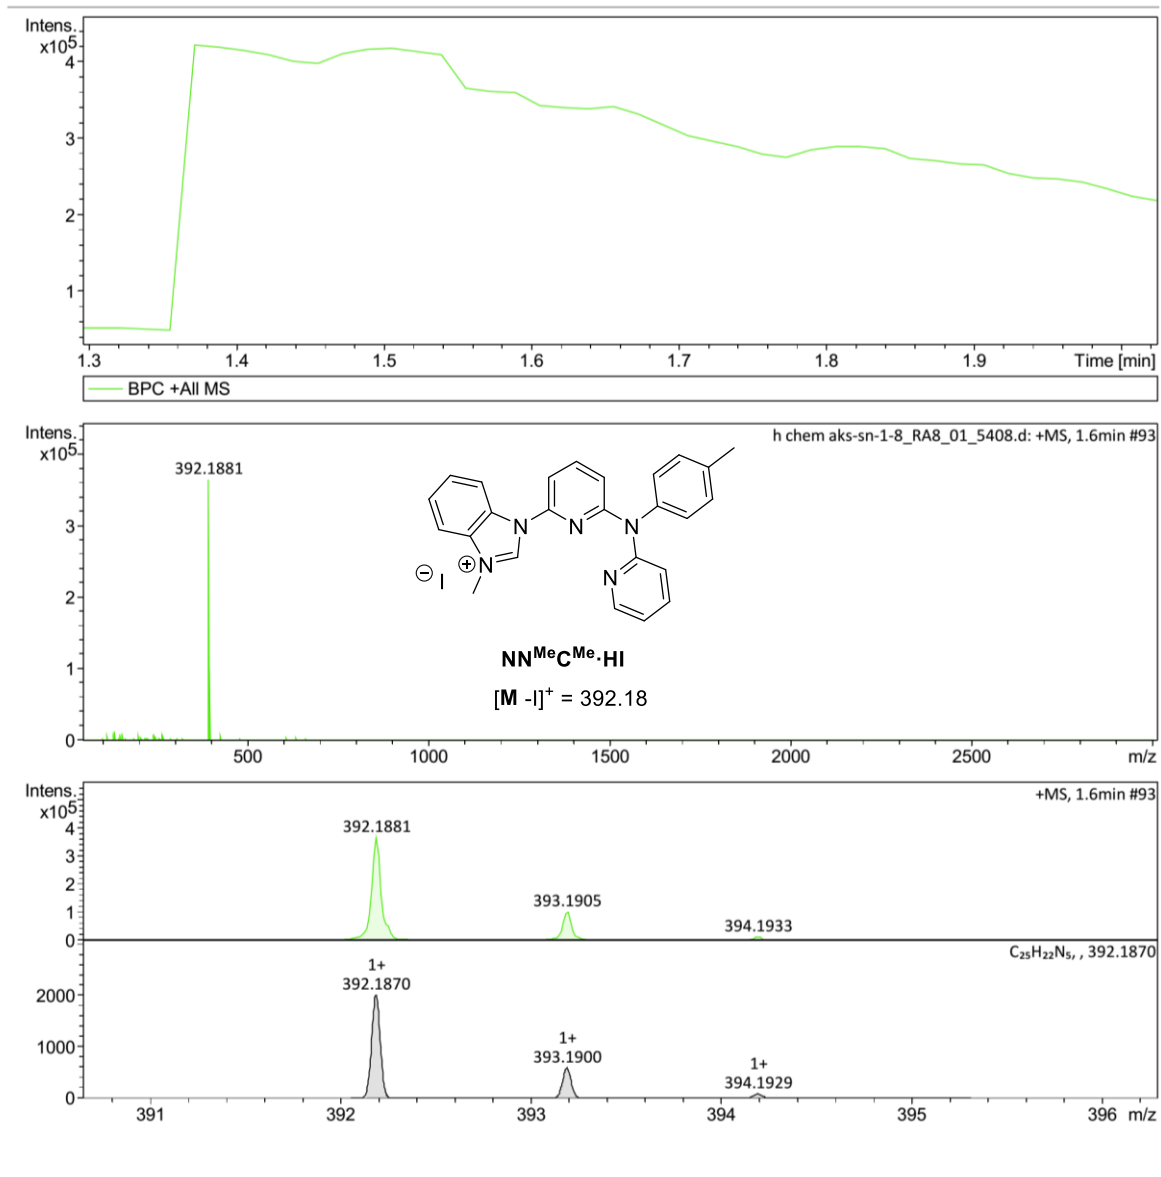

Figure S24. HRMS of NN<sup>Me</sup>C<sup>Me</sup>.HI.

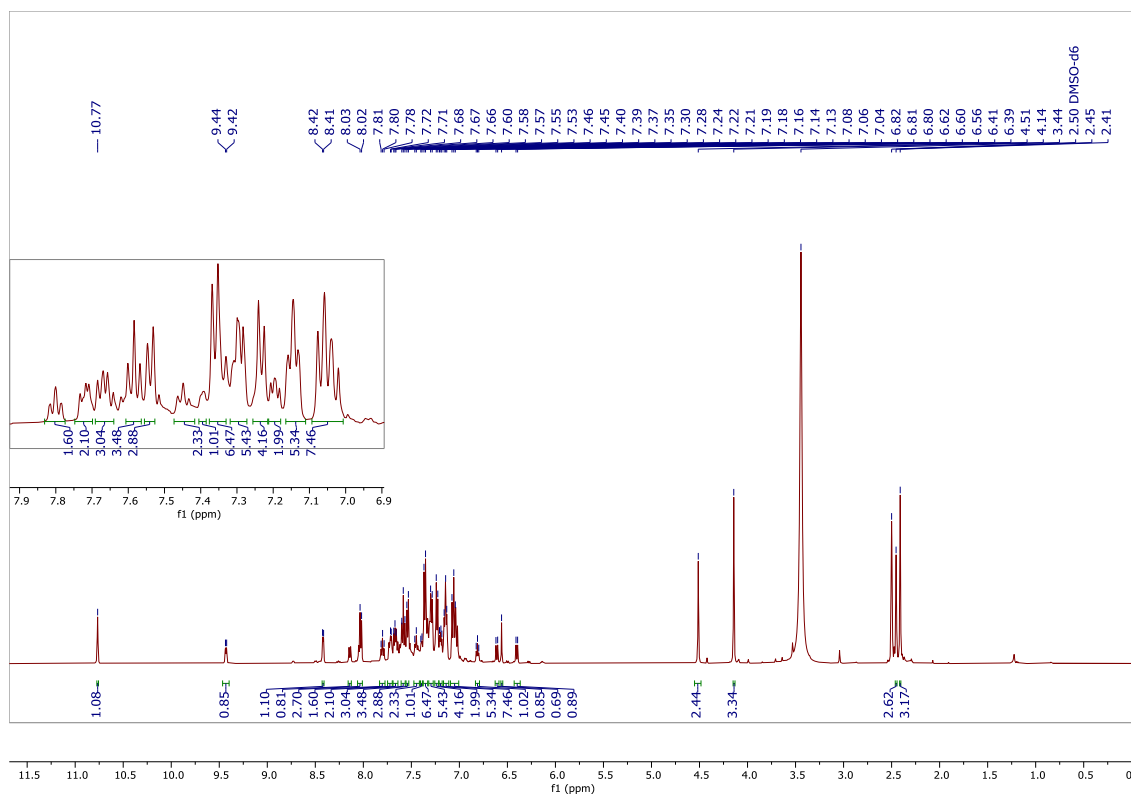

Figure S25.  $^1\text{H}$  NMR spectrum of **5** in  $\text{DMSO-d}_6$ .

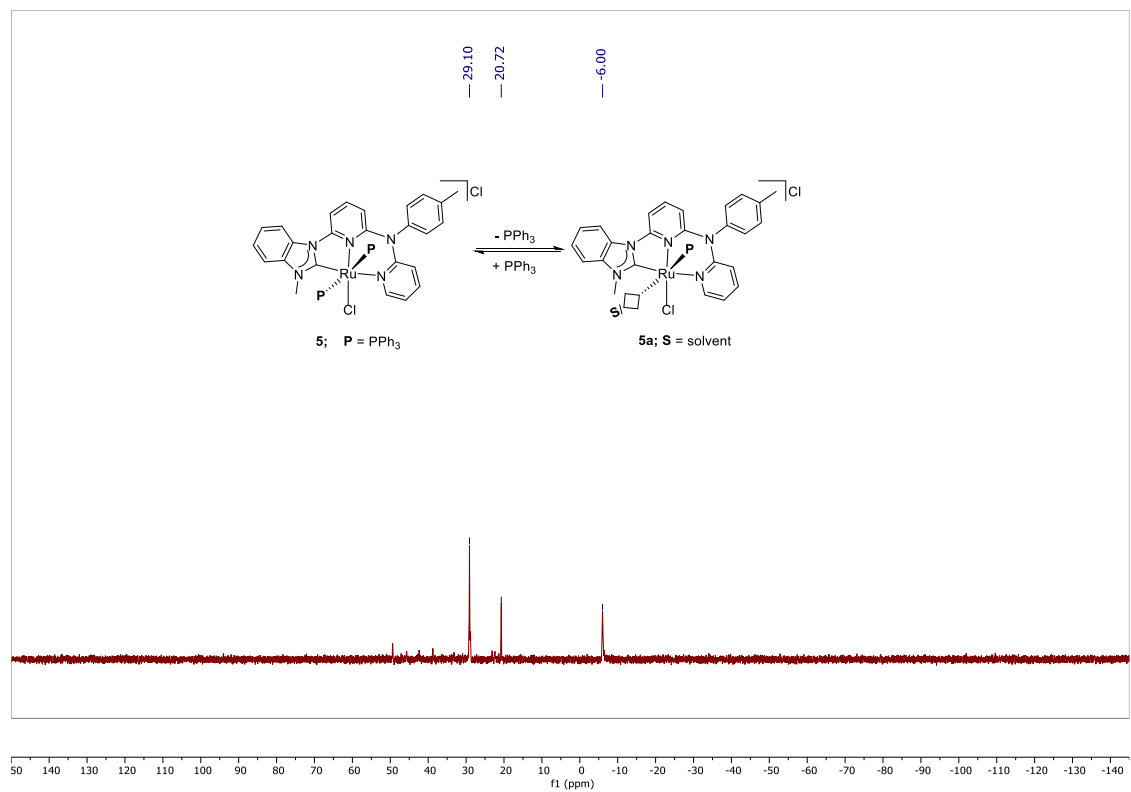

Figure S26.  $^{31}\text{P}\{^1\text{H}\}$  NMR spectrum of **5** in  $\text{DMSO-d}_6$ .

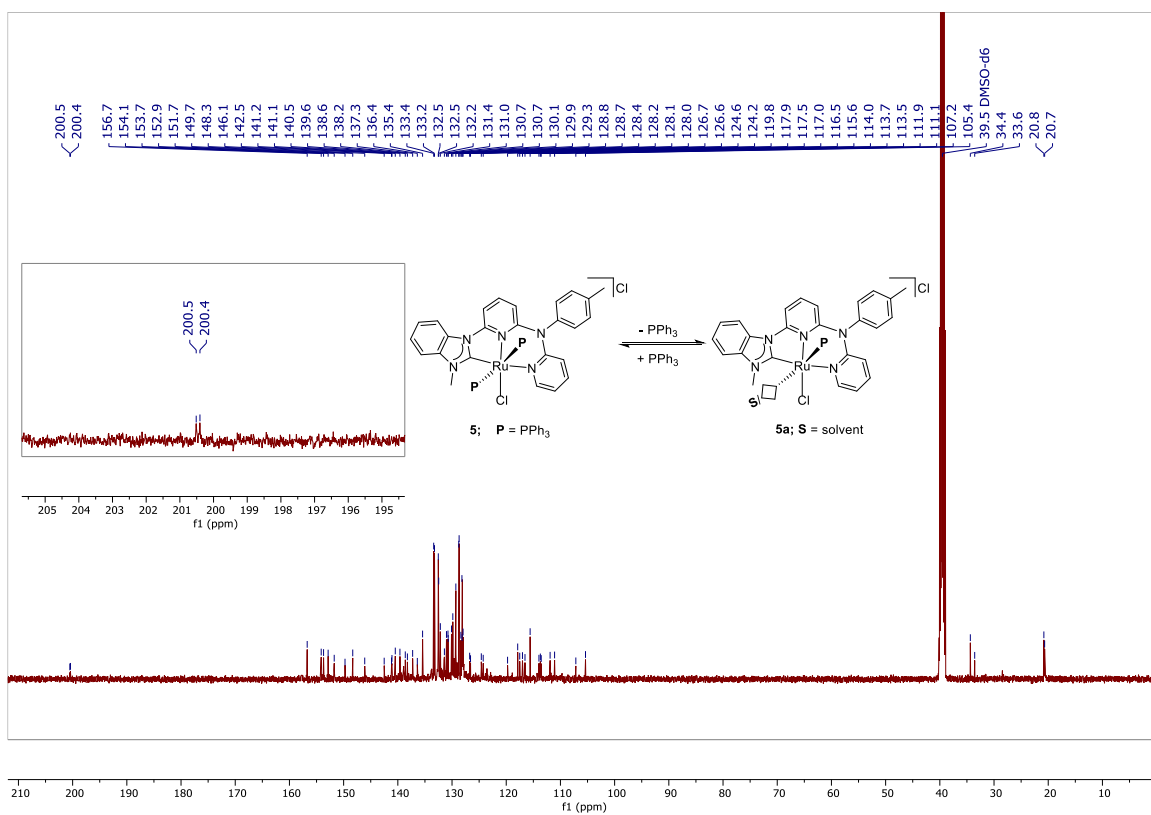

Figure S27.  $^{13}\text{C}\{^1\text{H}\}$  NMR spectrum of **5** in DMSO- $\text{d}_6$ .



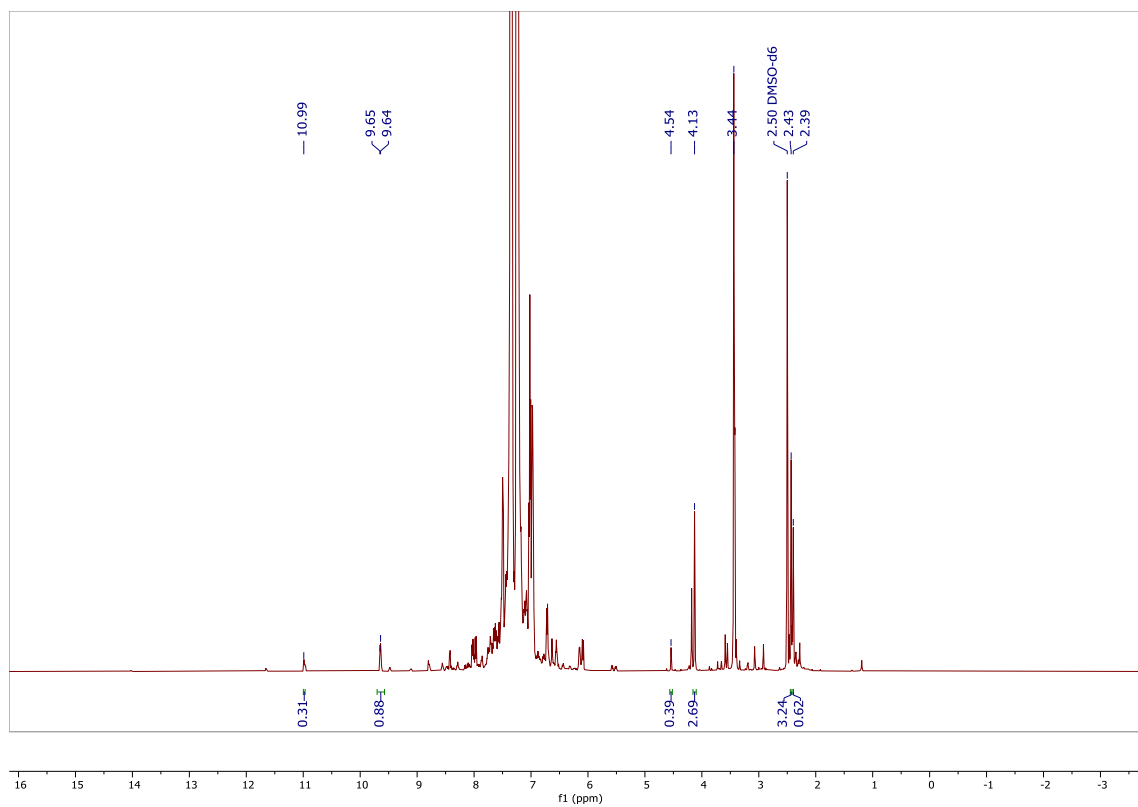

**Figure S28.**  $^1\text{H}$  NMR spectrum of **5** after adding 10 equiv. of  $\text{PPh}_3$  in  $\text{DMSO-d}_6$ .

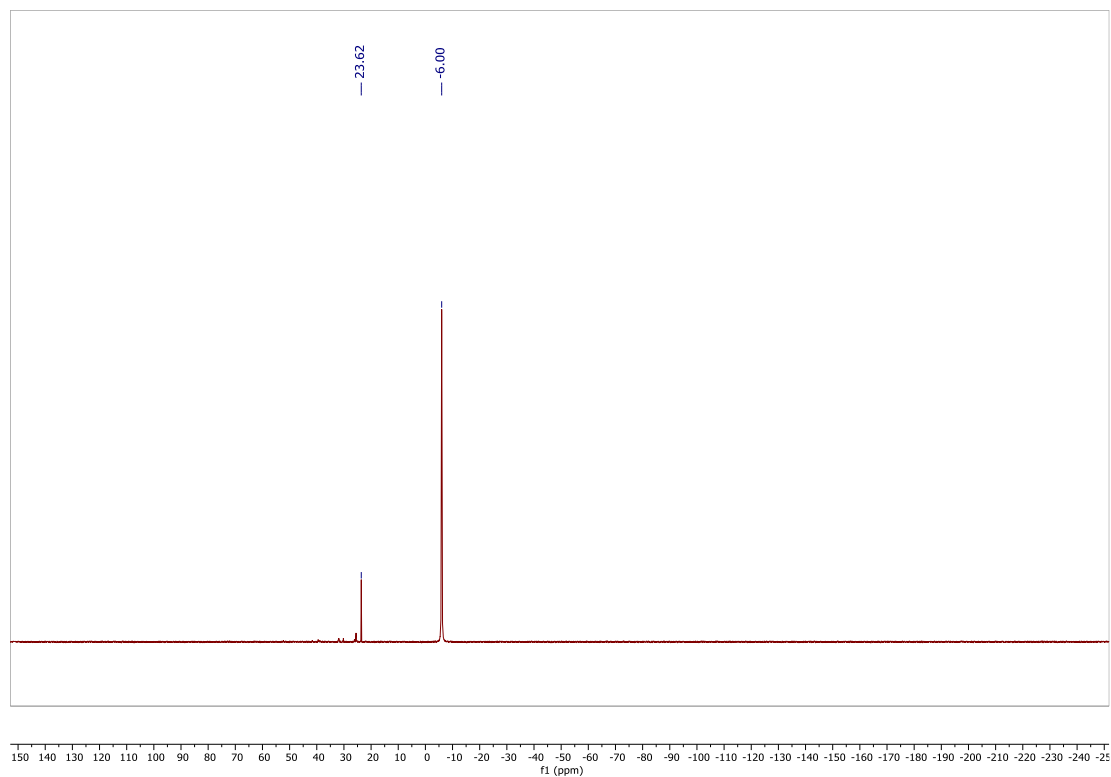

**Figure S29.**  $^{31}\text{P}\{^1\text{H}\}$  NMR spectrum of **5** after adding 10 equiv. of  $\text{PPh}_3$  in  $\text{DMSO-d}_6$ .

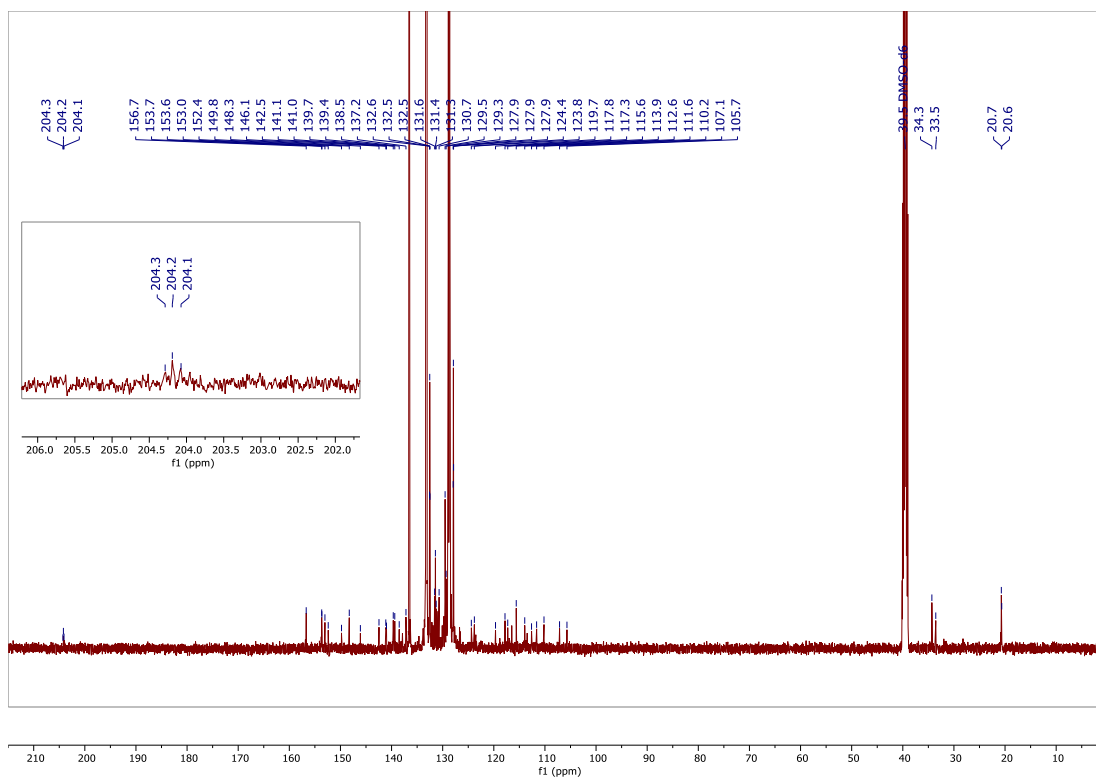

**Figure S30.**  $^{13}\text{C}\{^1\text{H}\}$  NMR spectrum of **5** after adding 10 equiv. of  $\text{PPh}_3$  in  $\text{DMSO-d}_6$ .

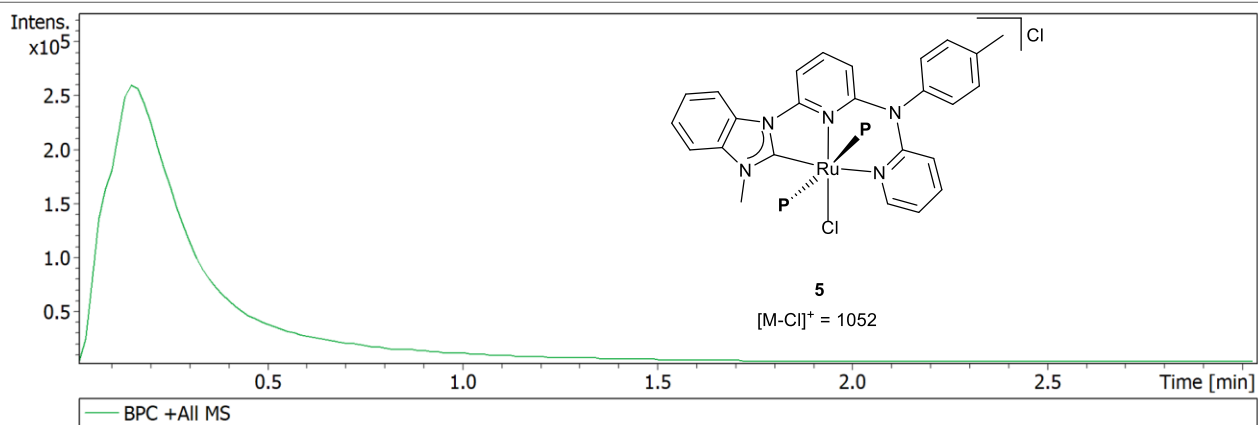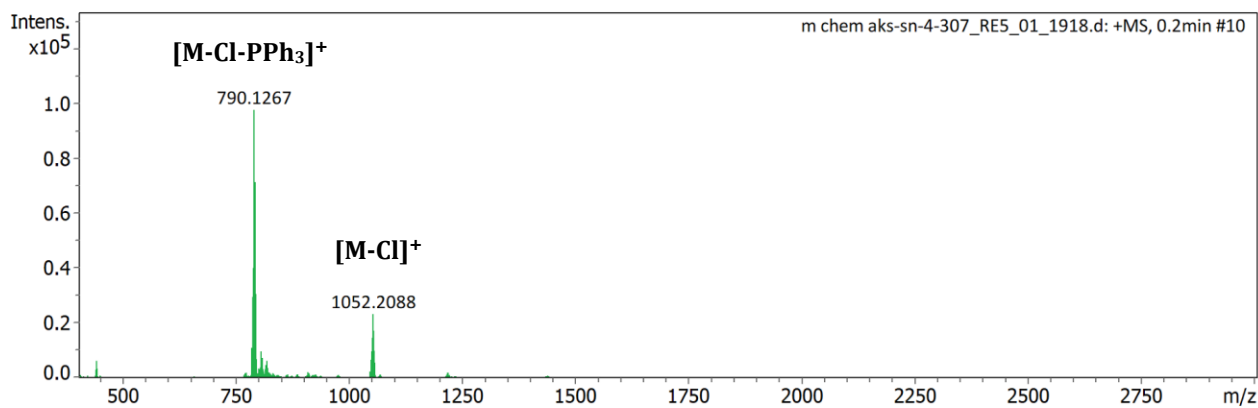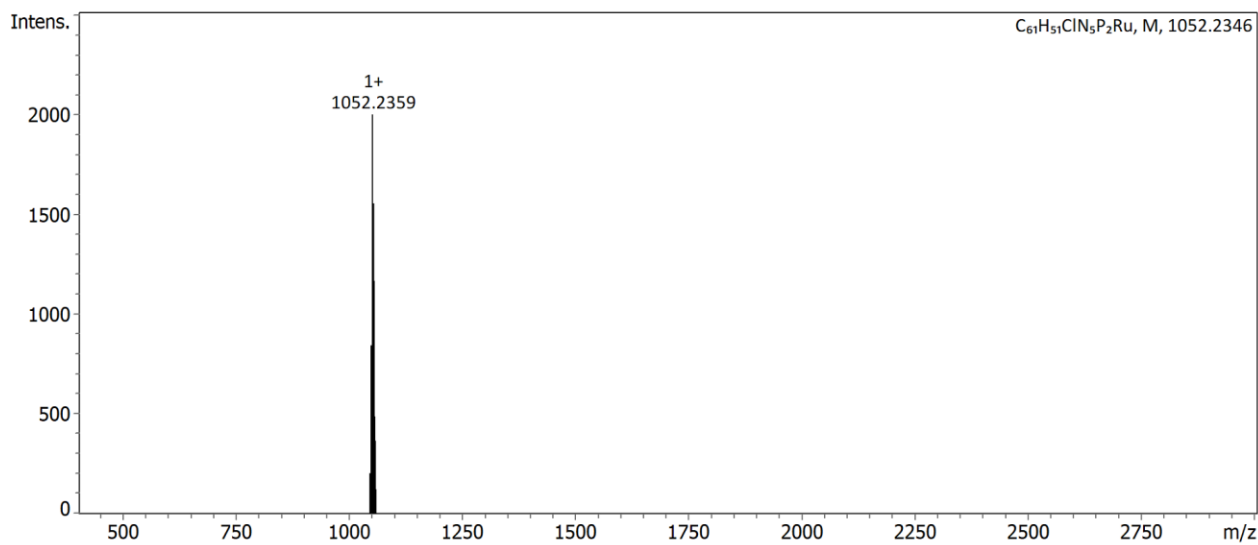

Figure S31. LC-MS of 5.

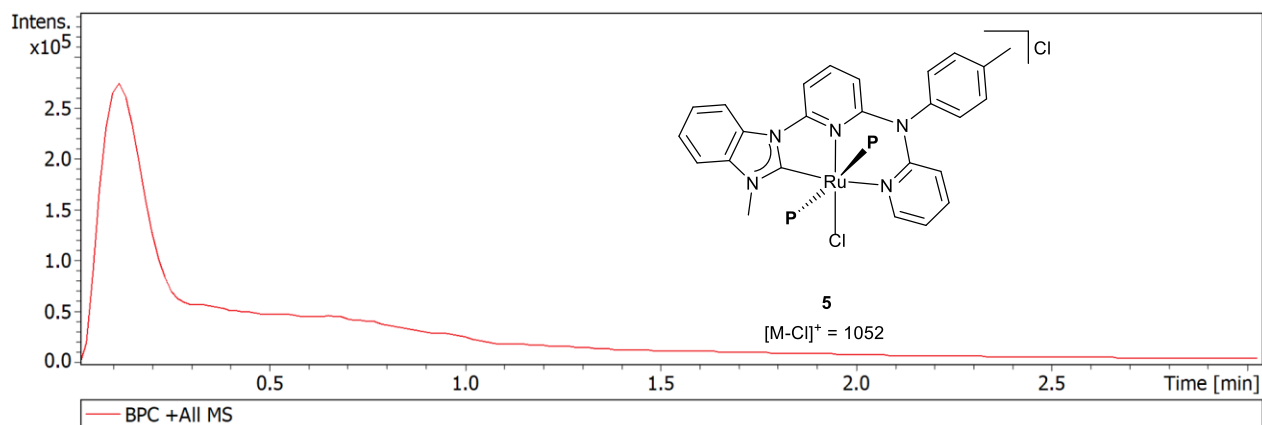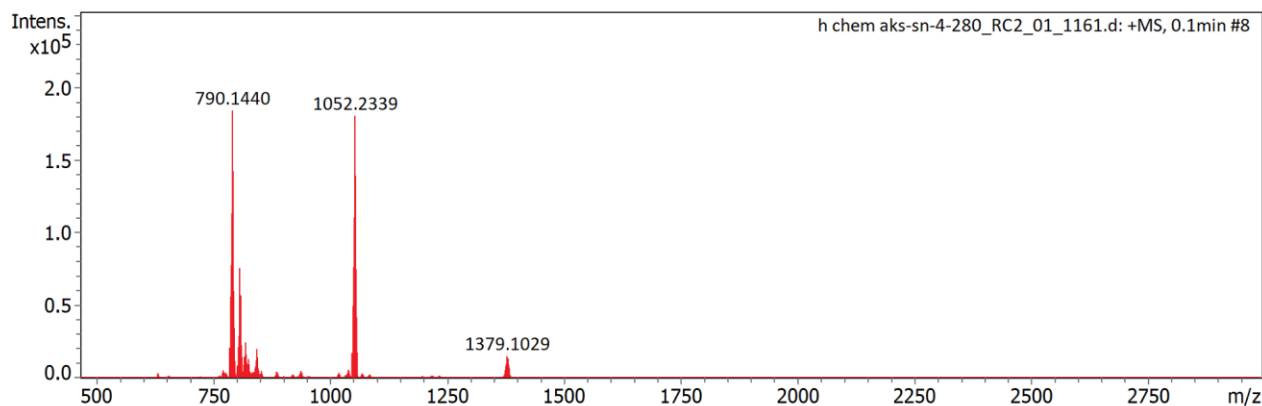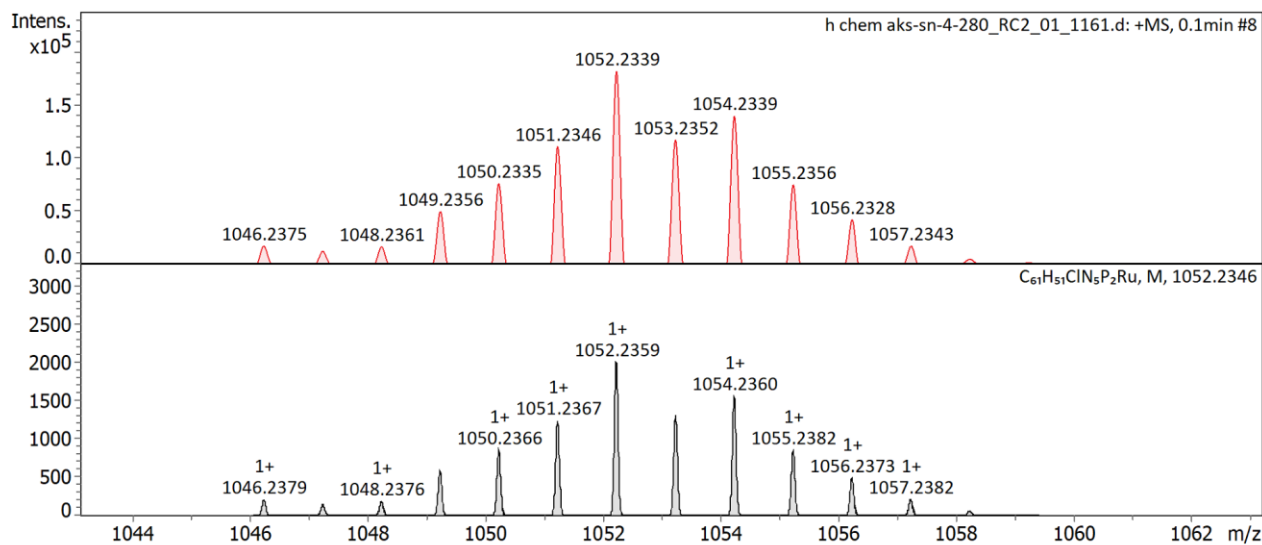

Figure S32. HRMS of 5.

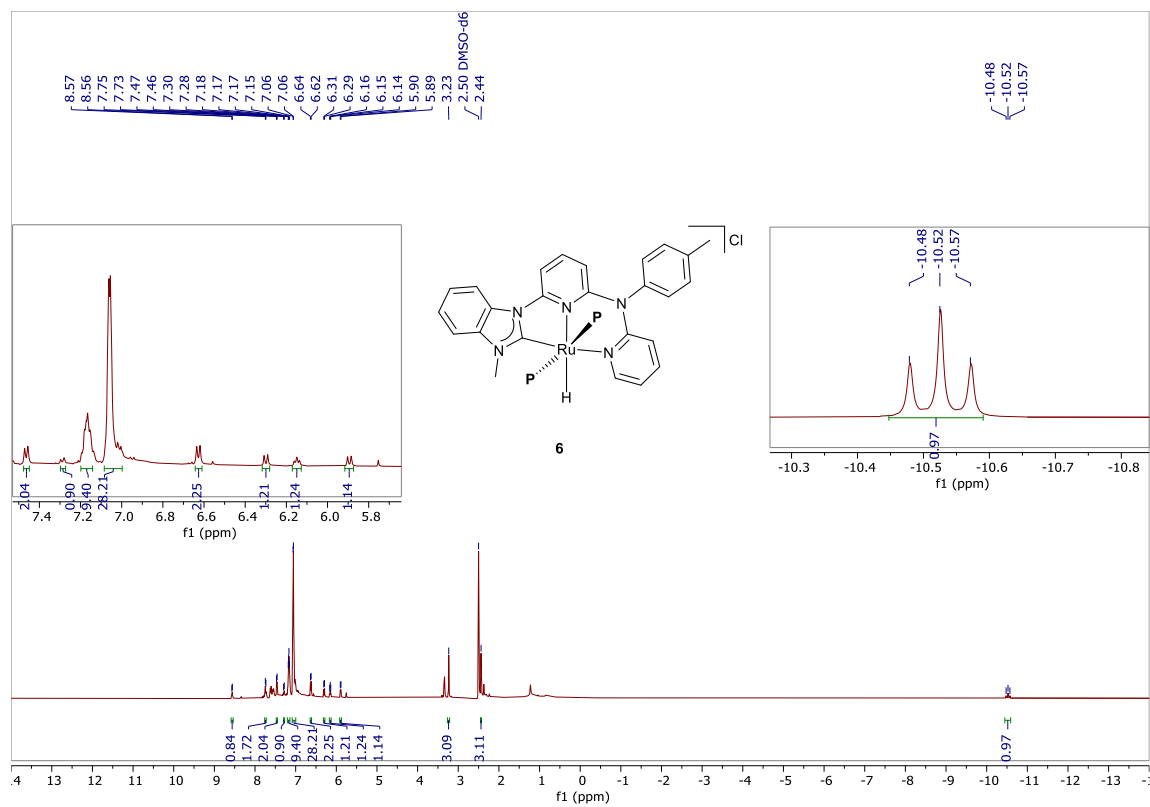

**Figure S33.**  $^1\text{H}$  NMR spectrum of **6** in  $\text{DMSO-d}_6$ .

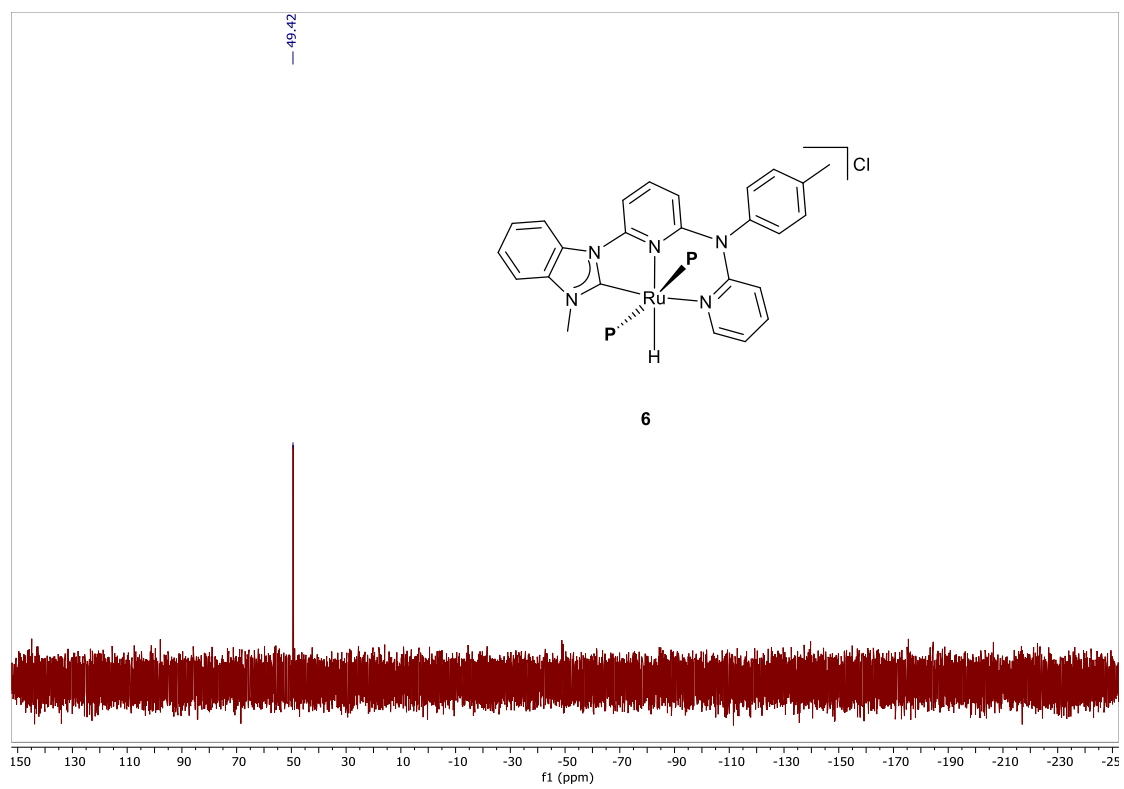

**Figure S34.**  $^{31}\text{P}\{^1\text{H}\}$  NMR spectrum of **6** in  $\text{DMSO-d}_6$ .

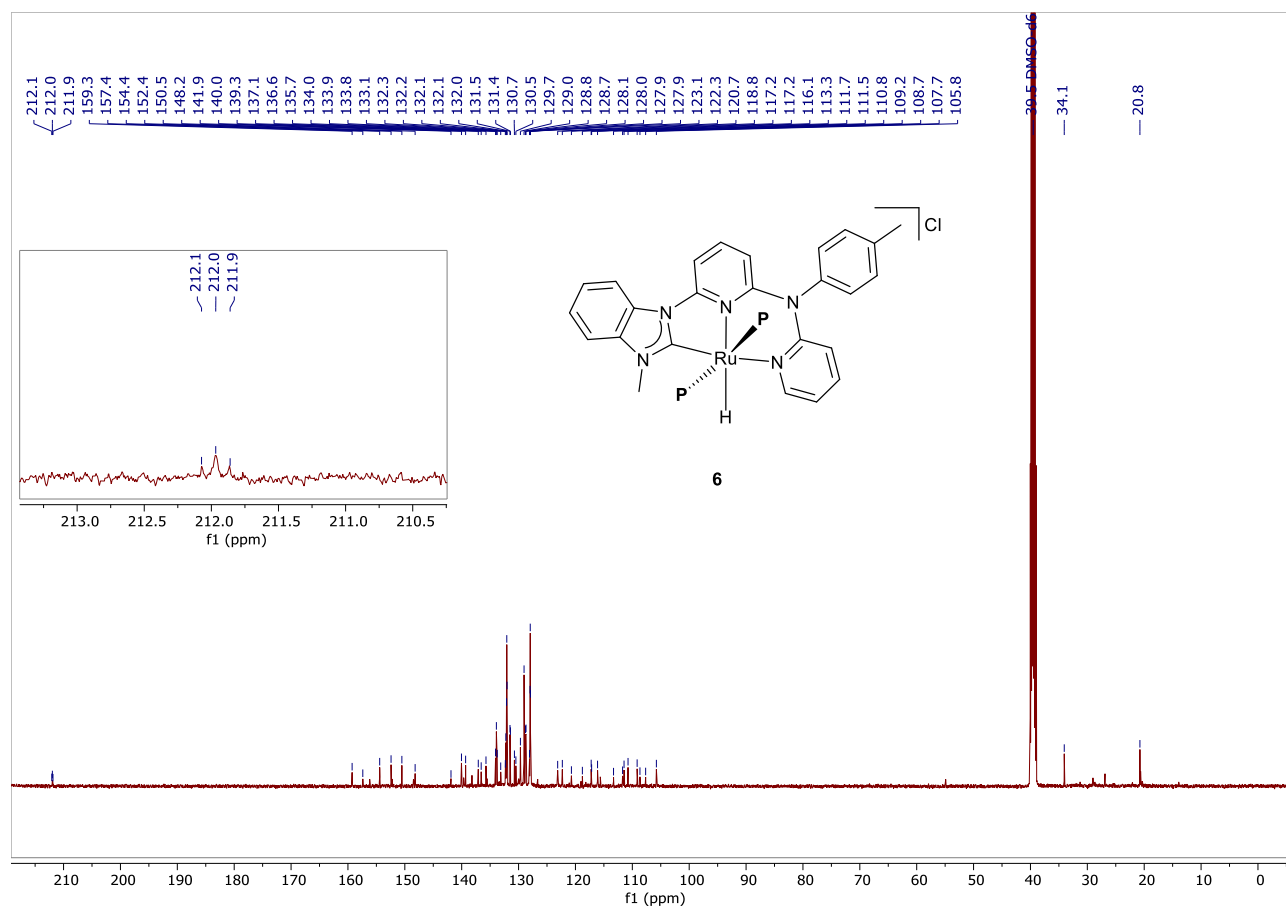

Figure S35.  $^{13}\text{C}\{^1\text{H}\}$  NMR spectrum of 6 in  $\text{DMSO-d}_6$ .

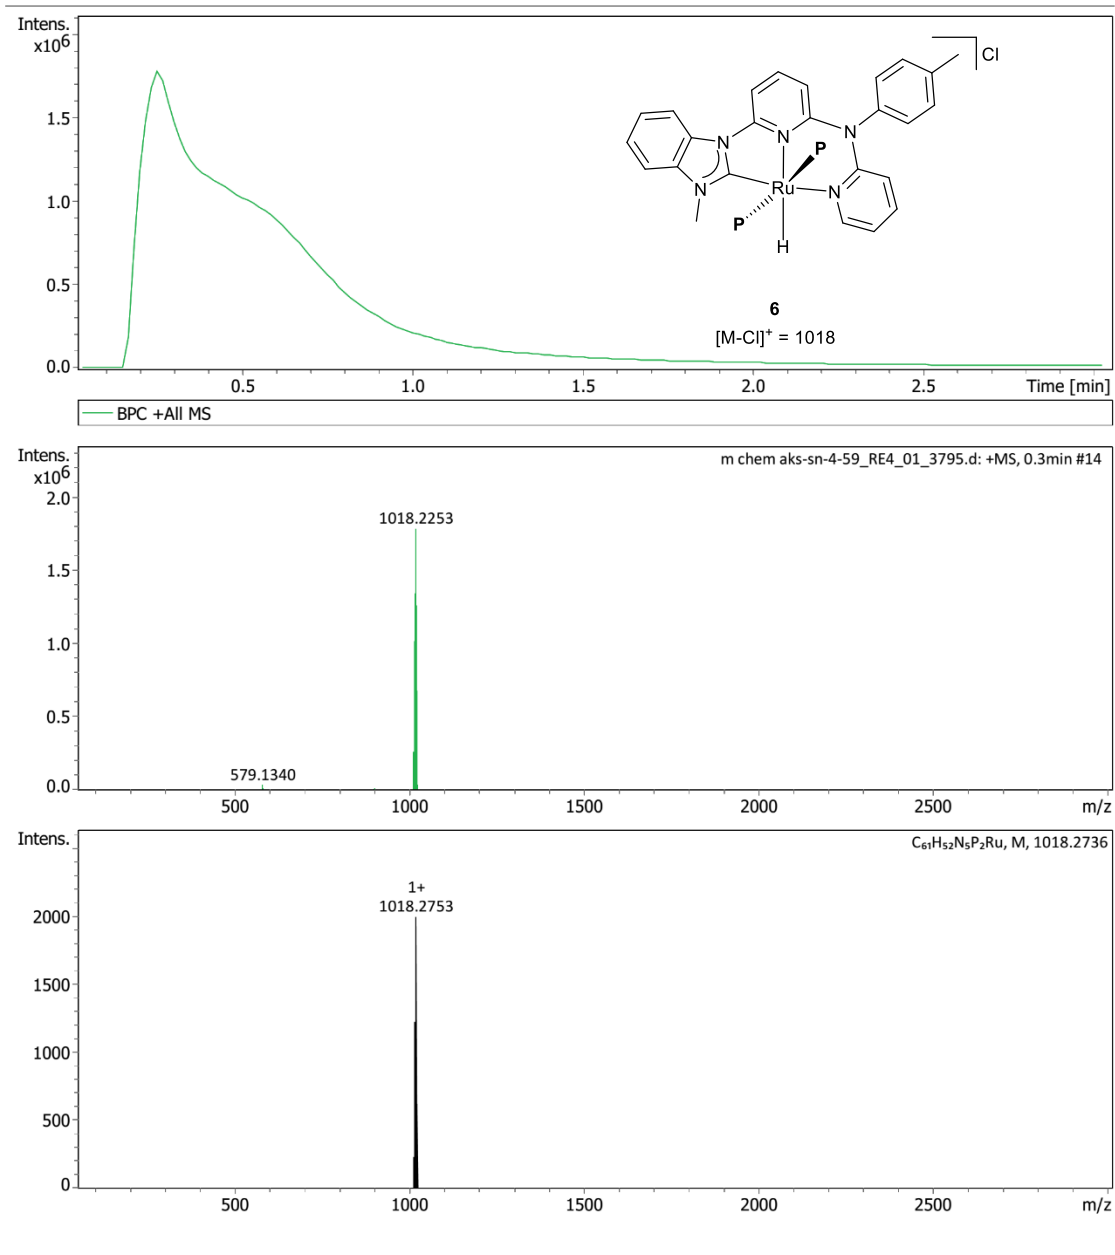

Figure S36. LC-MS of 6.

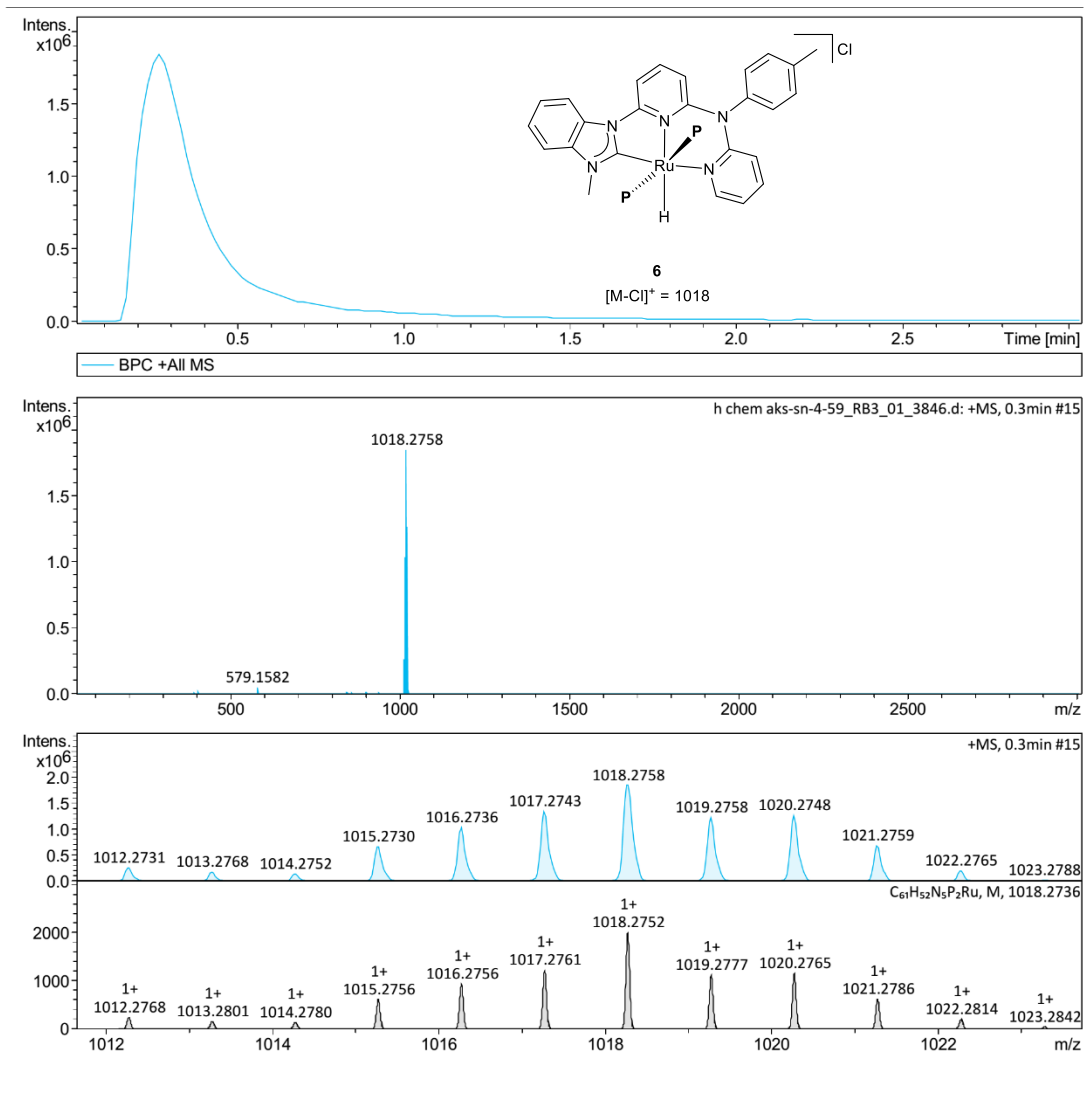

Figure S37. HRMS of 6.



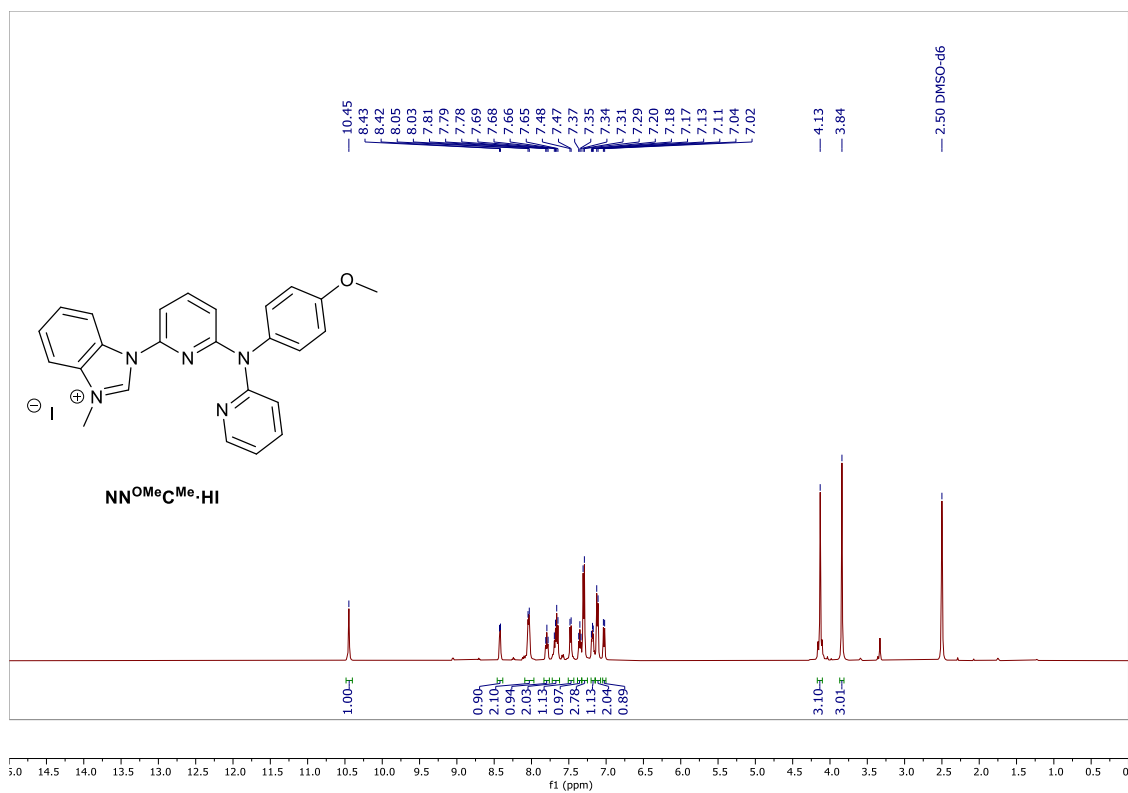

**Figure S38.**  $^1\text{H}$  NMR spectrum of  $\text{NN}^{\text{OMe}}\text{C}^{\text{Me}}\cdot\text{HI}$  in  $\text{DMSO-d}_6$ .

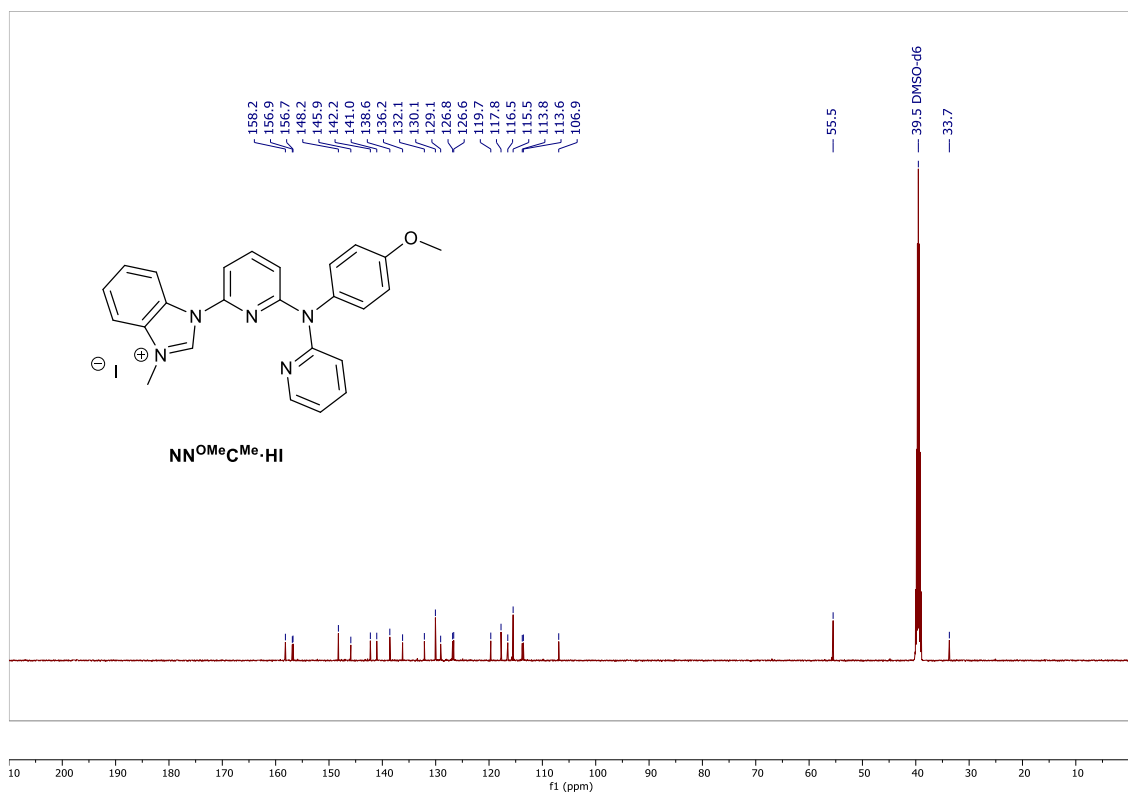

**Figure S39.**  $^{13}\text{C}\{^1\text{H}\}$  NMR spectrum of  $\text{NN}^{\text{OMe}}\text{C}^{\text{Me}}\cdot\text{HI}$  in  $\text{DMSO-d}_6$ .

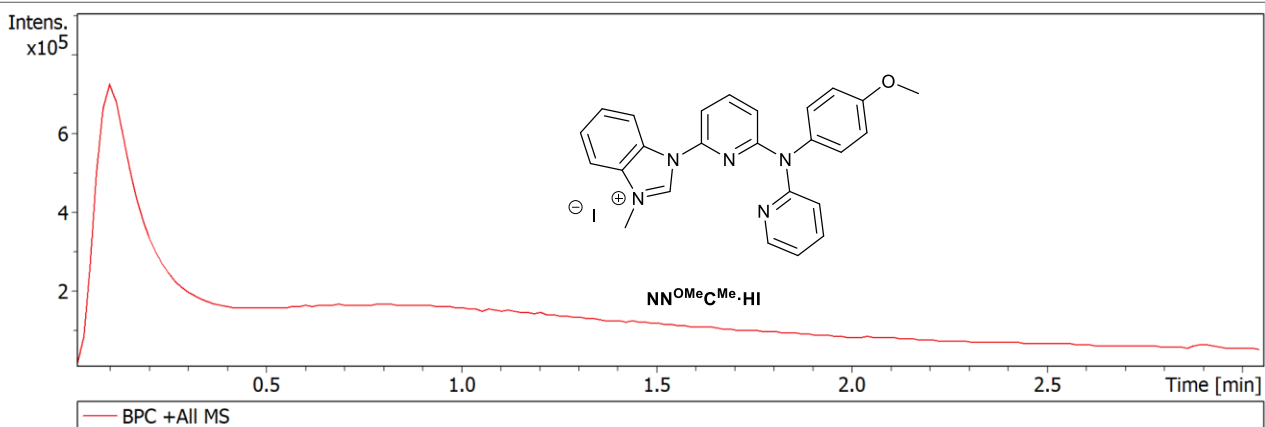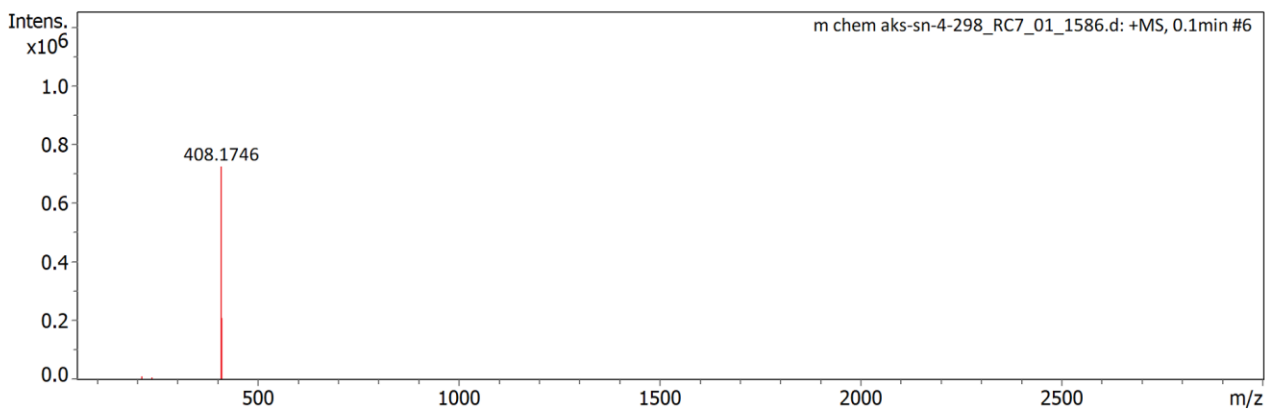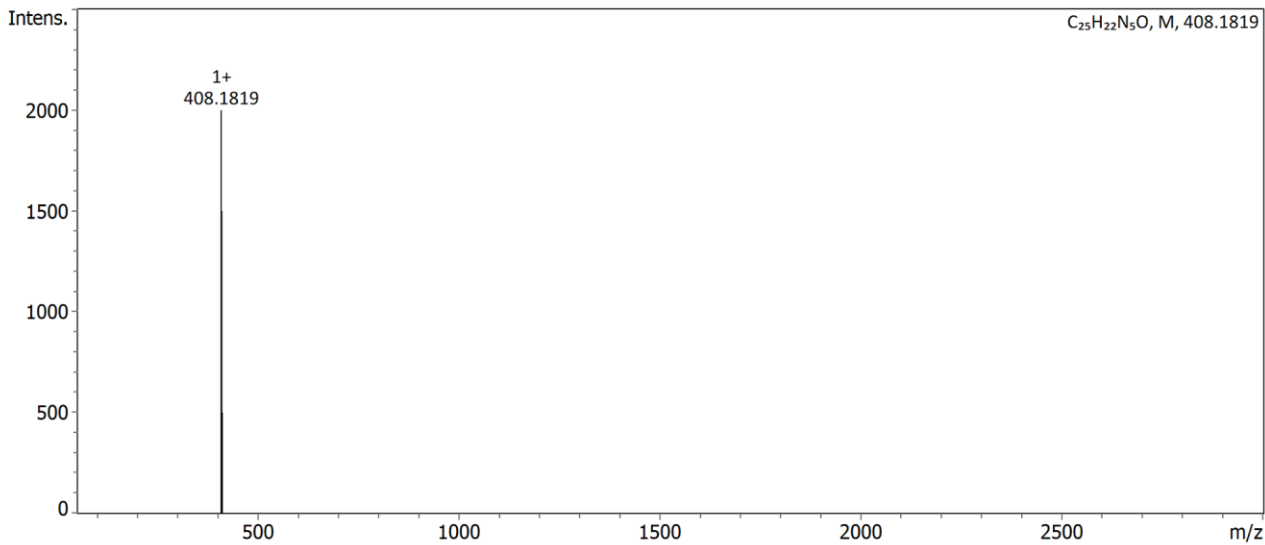

Figure S40. LCMS of NN<sup>OMe</sup>C<sup>Me</sup>.HI.

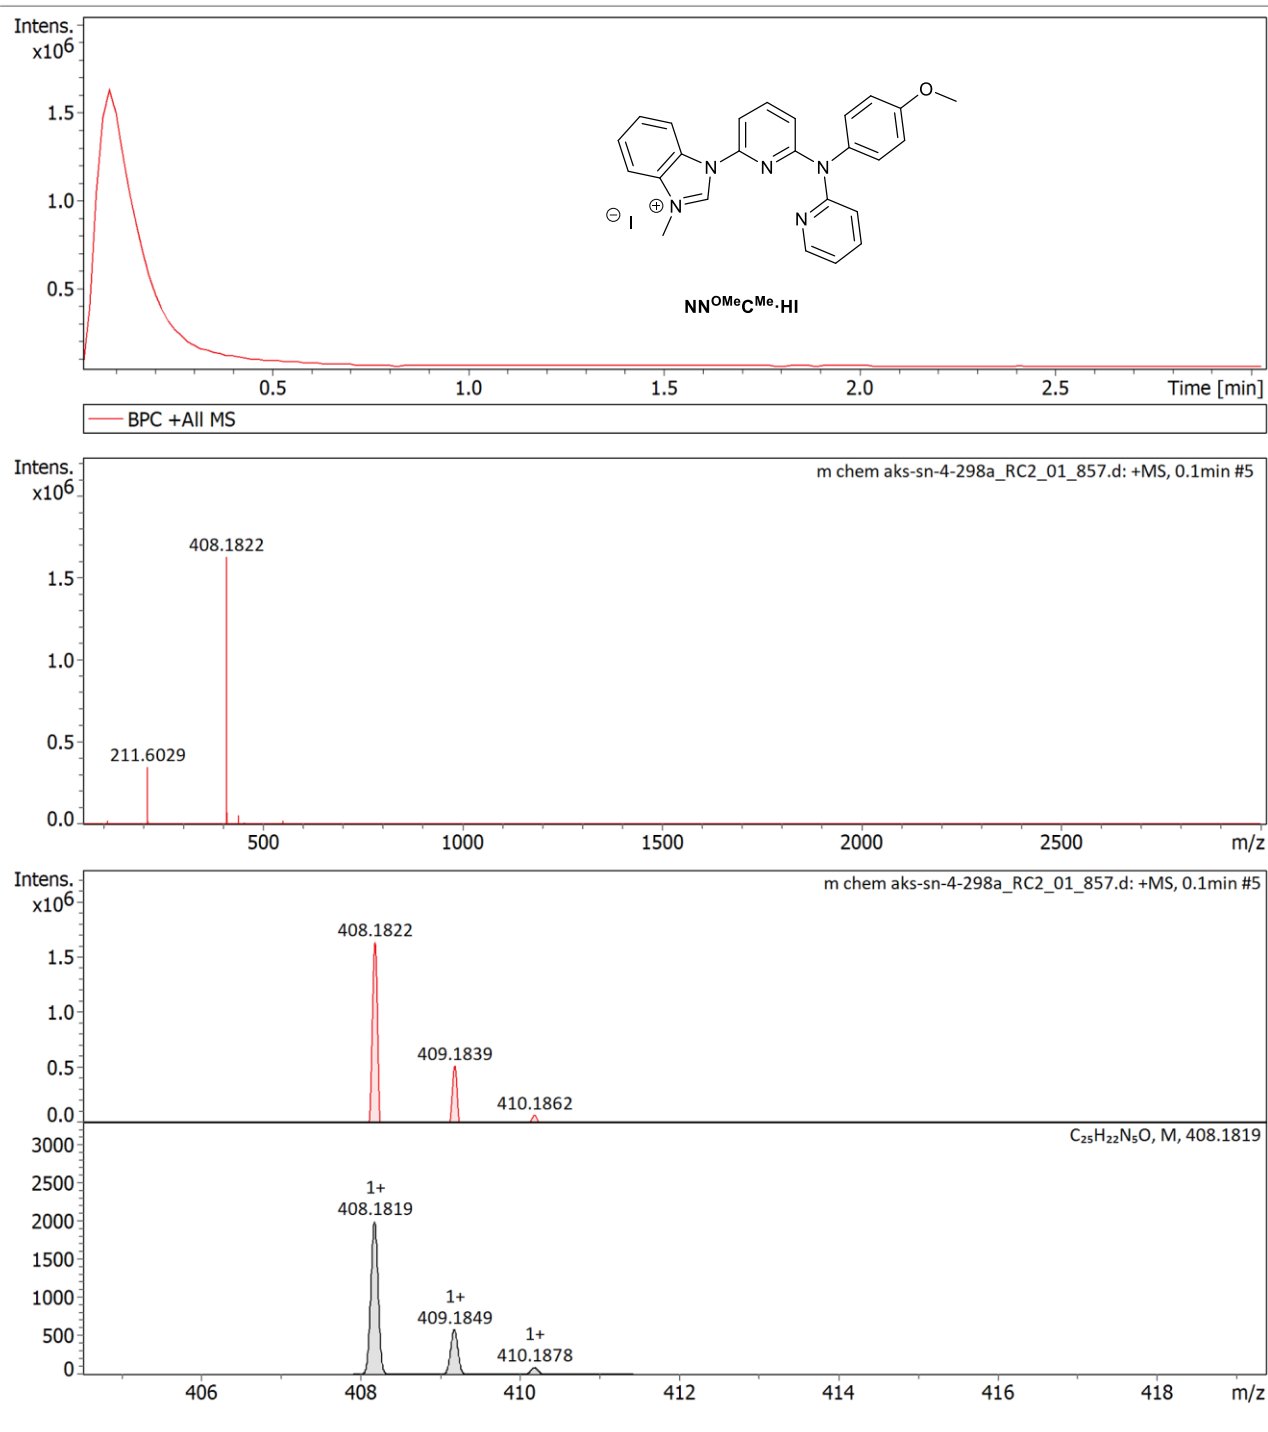

Figure S41. HRMS of  $NN^{OMe}C^{Me}.HI$ .

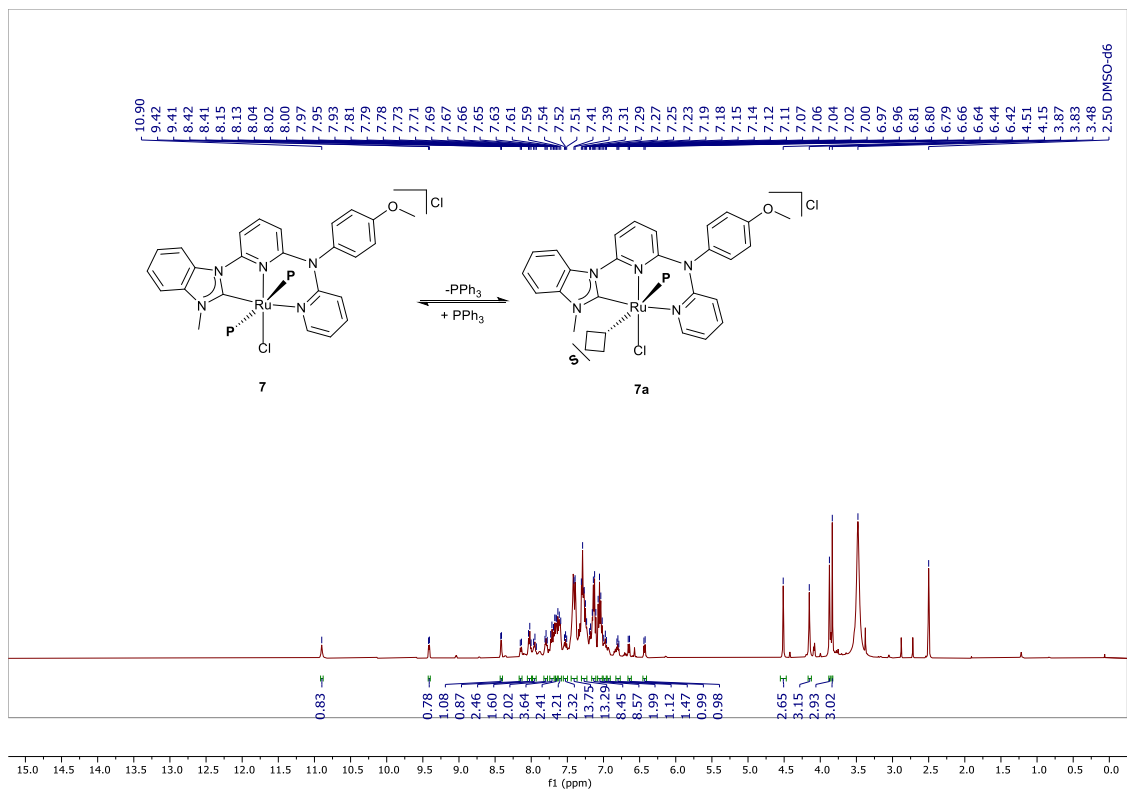

Figure S42.  $^1H$  NMR spectrum of **7** in DMSO- $d_6$ .

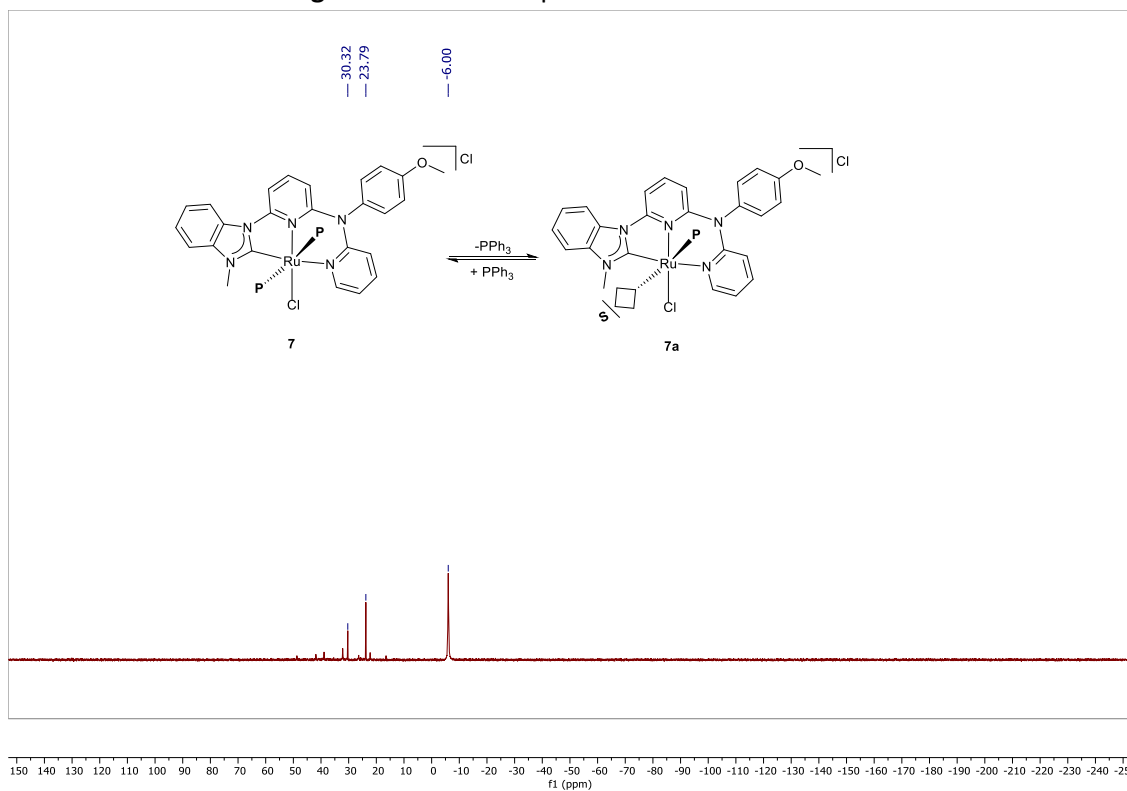

Figure S43.  $^{31}P\{^1H\}$  NMR spectrum of **7** in DMSO- $d_6$ .

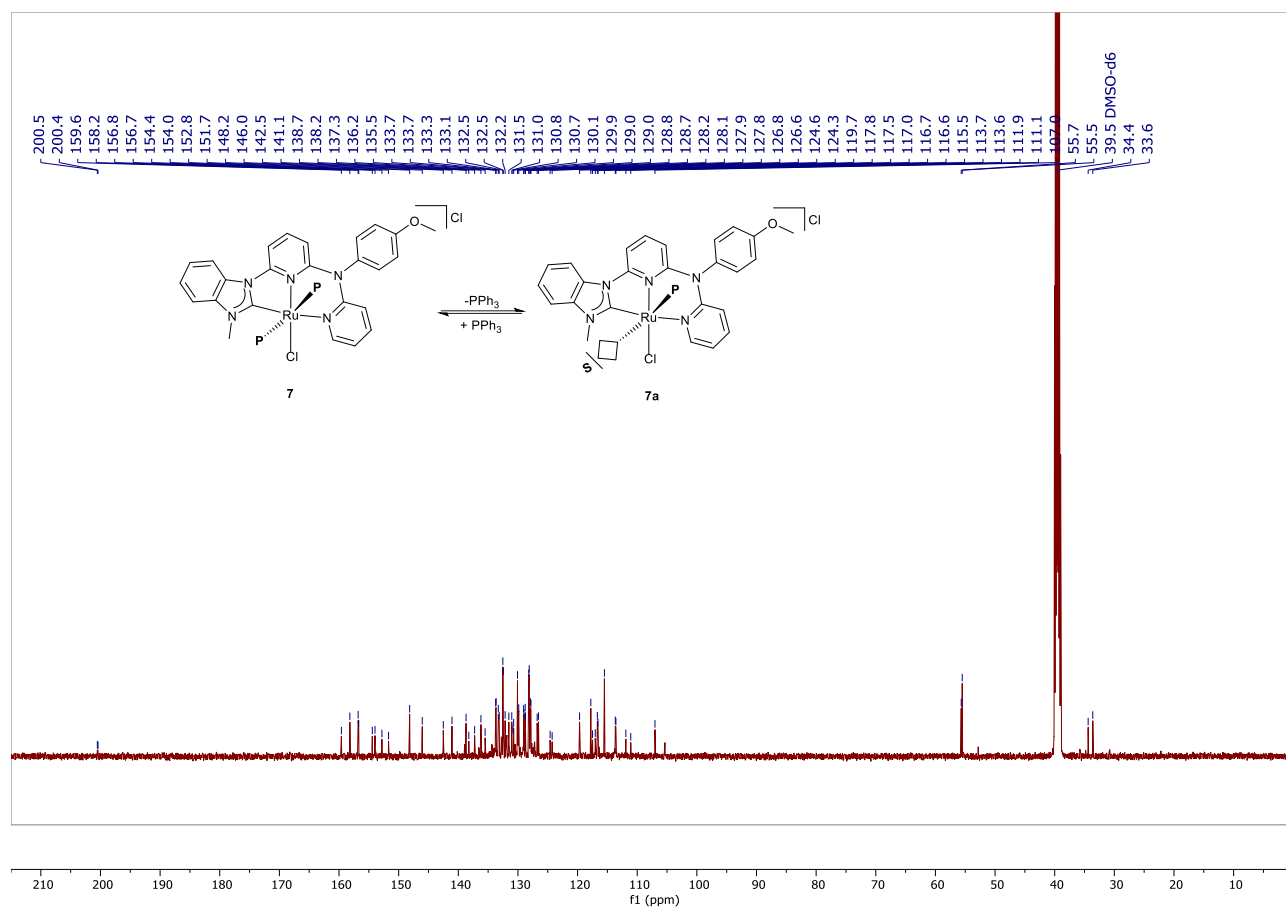

Figure S44.  $^{13}\text{C}\{^1\text{H}\}$  NMR spectrum of **7** in  $\text{DMSO-d}_6$ .

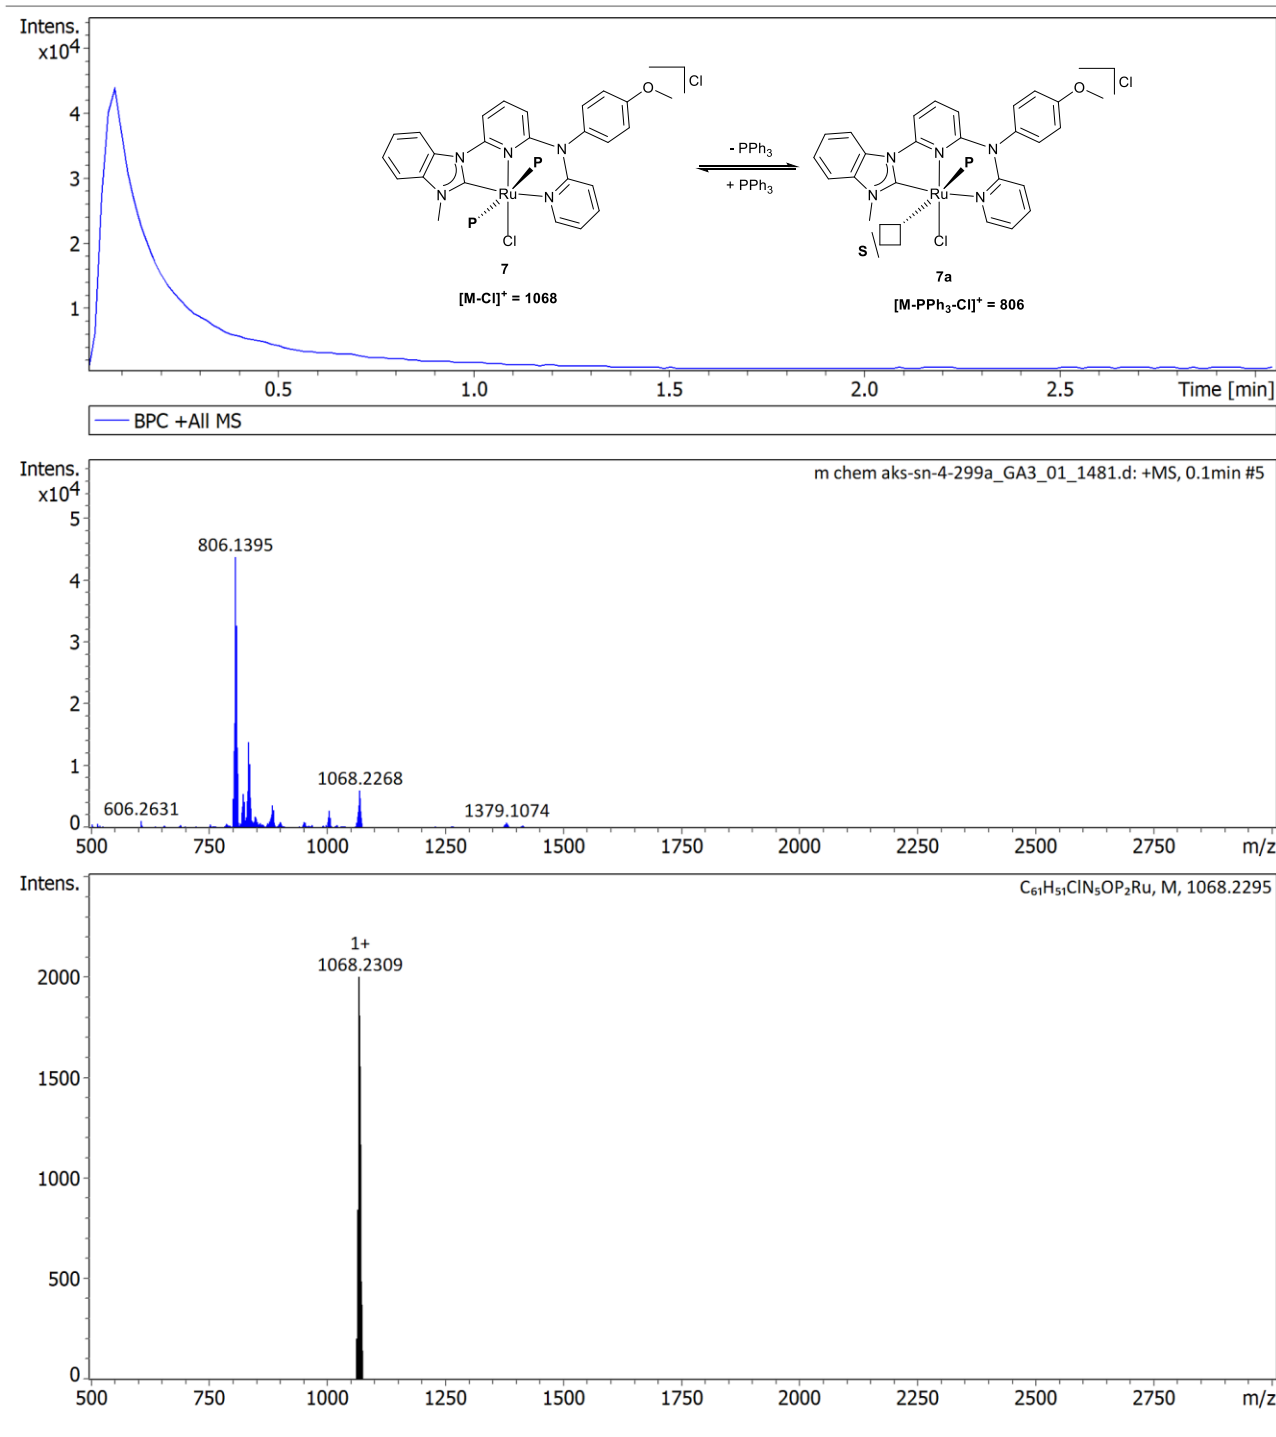

Figure S45. LCMS of **7**.

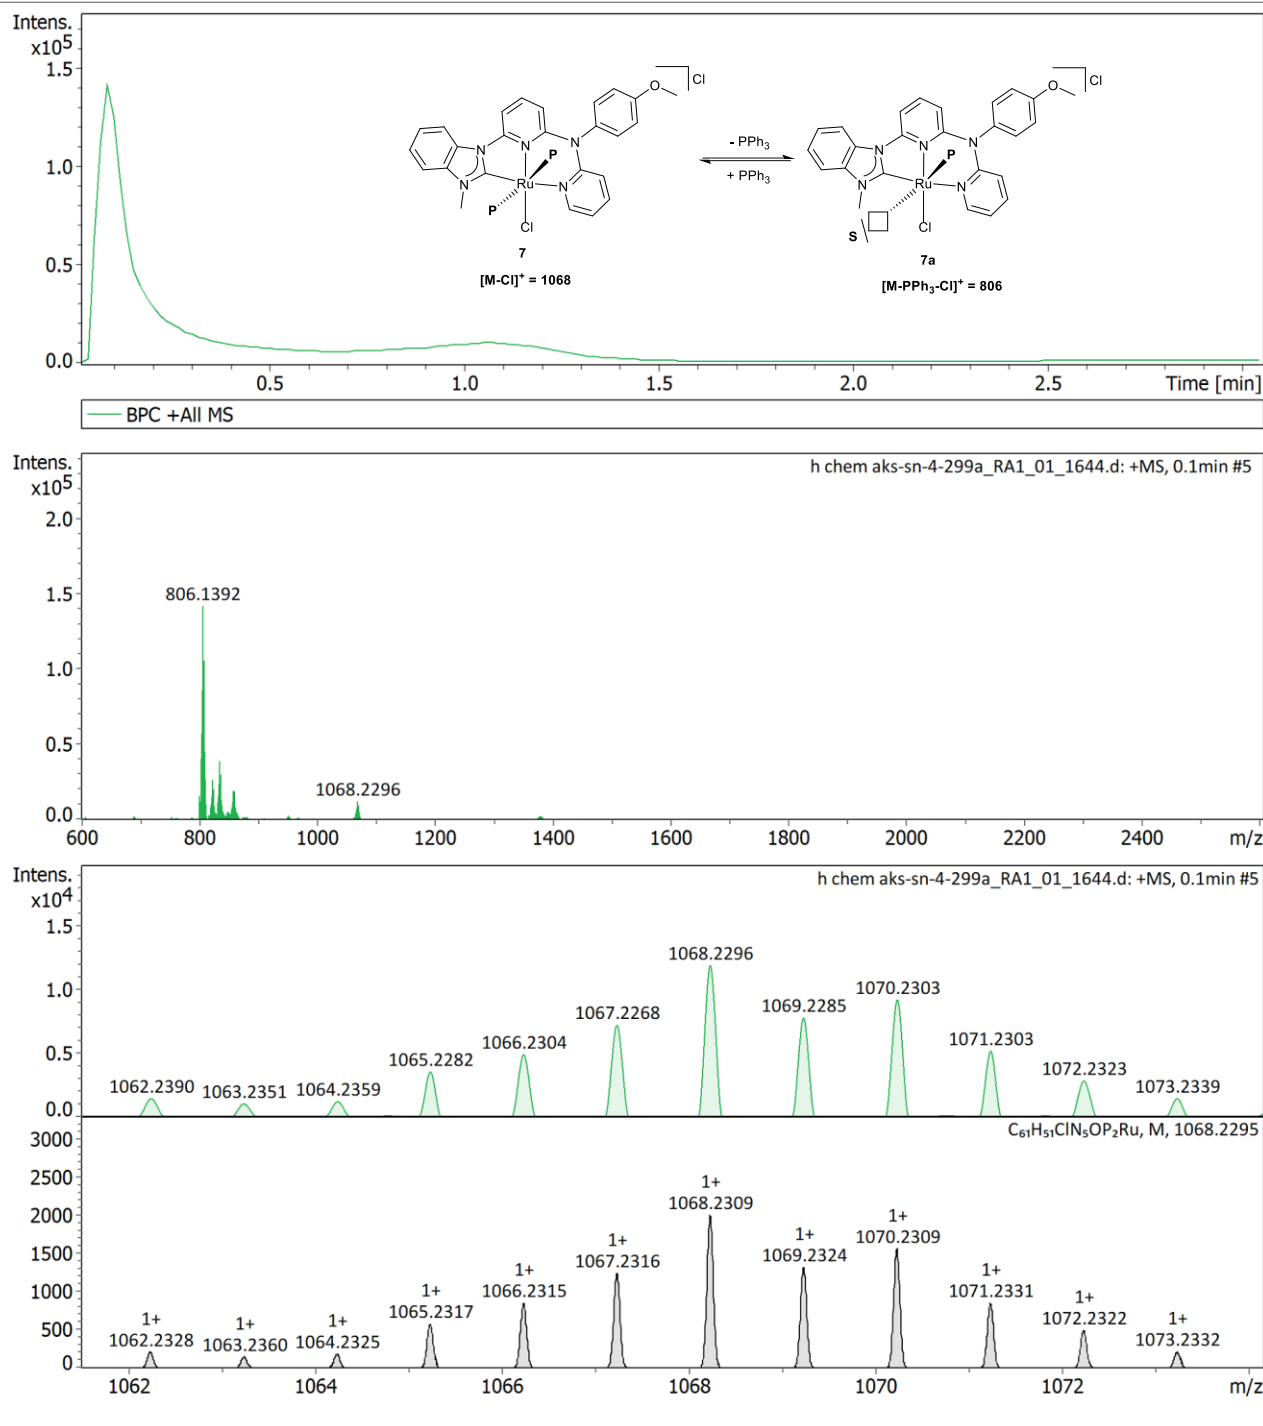

Figure S46. HRMS of **7**.

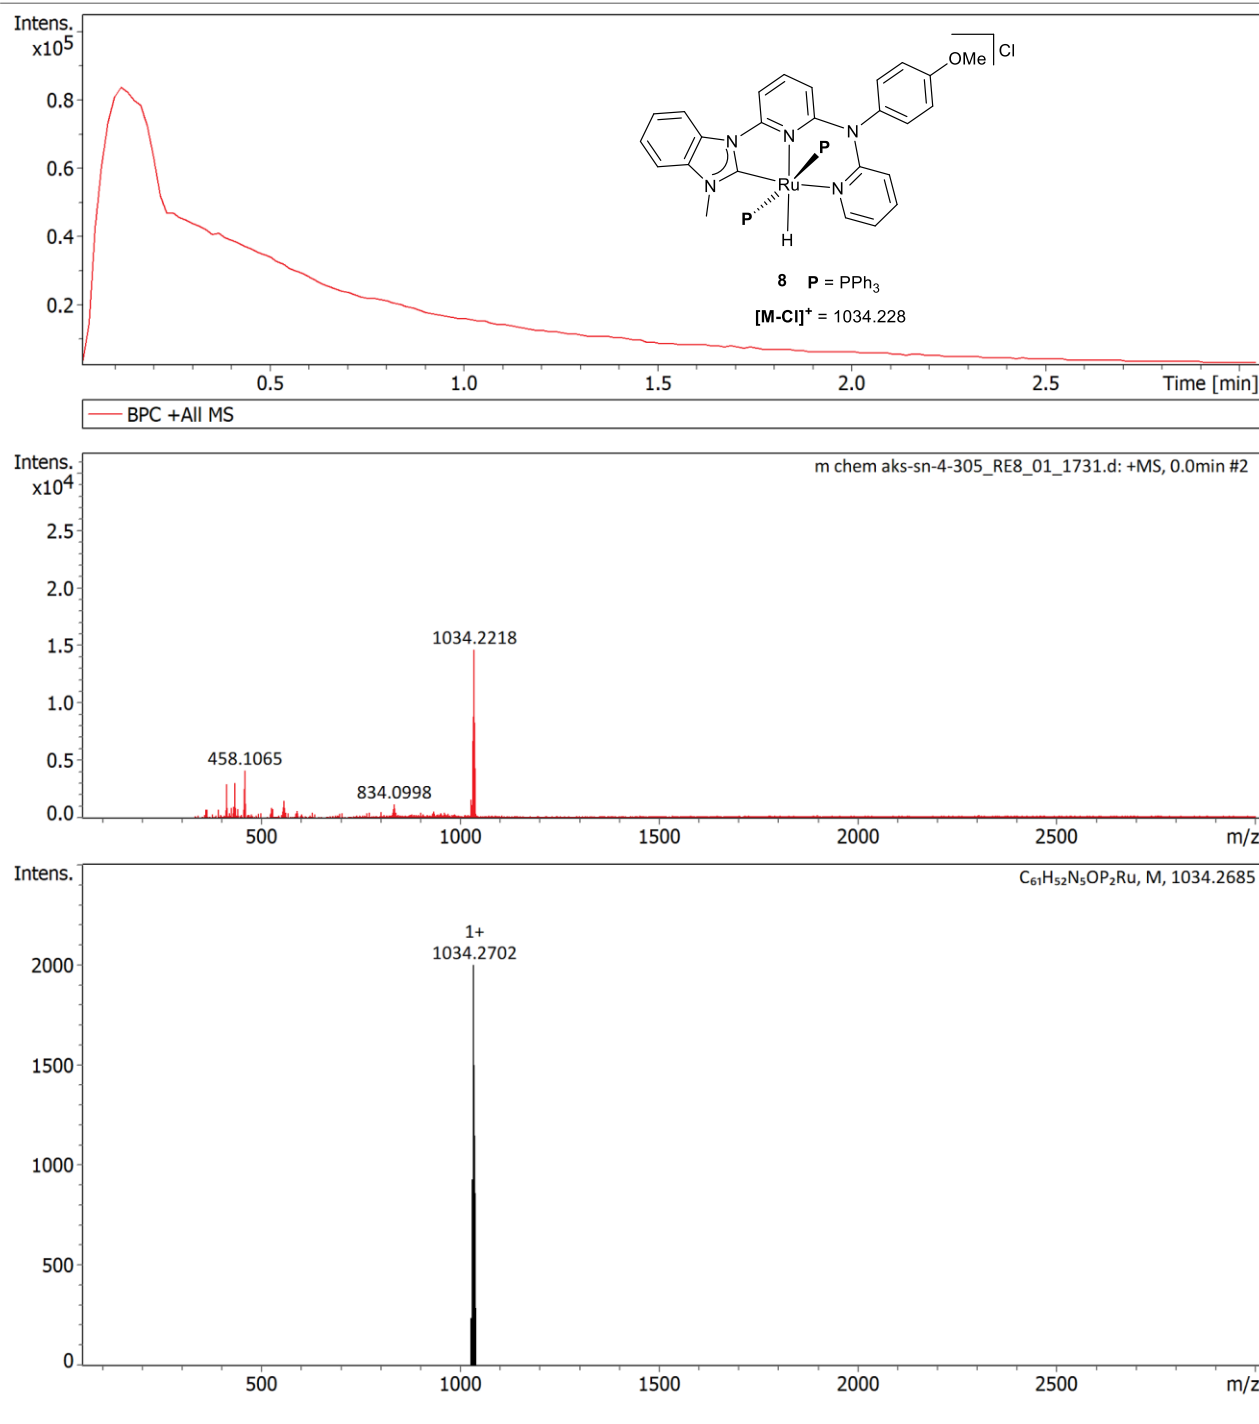

Figure S47. LCMS of **8**.



**X-ray Diffraction Studies:** Single crystals of complexes **3** suitable for X-ray crystallographic determination were obtained by layering a solution in MeOH with Ether (1/3, v/v) at -4 °C. Single crystal X-ray diffraction study for complex **3** was carried out using dual-core Agilent technology (Oxford diffraction) super Nova CCD system, with monochromated CuK $\alpha$  ( $\lambda = 1.54184 \text{ \AA}$ ). Unit cell determination, data collection and reduction, and empirical absorption correction were performed using the CrysAlisPro65 program. The Olex 2-1.5 program was used as the graphical interface.<sup>1</sup> The structure model was refined using full matrix least squares minimization on F<sup>2</sup> using ShelXL within Olex2 for a graphical interface.<sup>2</sup> The structures were solved by direct methods using SHELXT,<sup>3</sup> which revealed the positions of all not-disordered non-hydrogen atoms. The non-hydrogen atoms were refined anisotropically. All hydrogen positions were fixed in place for the final refinement cycles. CCDC 2299181 contains the supplementary crystallographic data for this paper.

**Crystallographic Data:** Table S1 Crystal data and structure refinement parameters.

| <b>3</b>                               |                                                                                                 |
|----------------------------------------|-------------------------------------------------------------------------------------------------|
| Empirical formula                      | C <sub>61</sub> H <sub>53</sub> P <sub>2</sub> Cl <sub>2</sub> N <sub>5</sub> O <sub>2</sub> Ru |
| Formula weight                         | 1121.99                                                                                         |
| Temperature/K                          | 298                                                                                             |
| Crystal system                         | Monoclinic                                                                                      |
| Space group                            | P21/c                                                                                           |
| a/ $\text{\AA}$                        | 13.5479(11)                                                                                     |
| b/ $\text{\AA}$                        | 22.1691(10)                                                                                     |
| c/ $\text{\AA}$                        | 23.429(2)                                                                                       |
| $\alpha$ /°                            | 90                                                                                              |
| $\beta$ /°                             | 131.809(14)                                                                                     |
| $\gamma$ /°                            | 90                                                                                              |
| Volume/ $\text{\AA}^3$                 | 5245.0(11)                                                                                      |
| Z                                      | 4                                                                                               |
| $\rho_{\text{calc}}/\text{cm}^3$       | 1.421                                                                                           |
| $\mu/\text{mm}^{-1}$                   | 4.327                                                                                           |
| F(000)                                 | 2312.0                                                                                          |
| Radiation                              | CuK $\alpha$ ( $\lambda = 1.54184$ )                                                            |
| 2 $\theta$ range for data collection/° | 7.808 to 142.392                                                                                |
| Reflections collected                  | 25346                                                                                           |

|                                         |                           |
|-----------------------------------------|---------------------------|
| Independent reflections                 | 9922 [Rint = 0.1173]      |
| Data/restraints/parameters              | 9922/0/661                |
| Goodness-of-fit on F2                   | 1.116                     |
| Final R indexes [ $I \geq 2\sigma(I)$ ] | R1 = 0.0960, wR2 = 0.2217 |
| Final R indexes [all data]              | 0.1479, wR2 = 0.2727      |

### General method for transfer hydrogenation of ketone

The general procedure for transfer hydrogenation: An oven-dried Schlenk tube equipped with a magnetic stirring bar was loaded with catalyst (1 – 0.01 mol%), base (10 mol%), and anhydrous 2-propanol (3 mL) to make it homogeneous. Next, add the substrate (1 mmol) to the reaction mixture. After that, the Schlenk tube was placed in a preheated oil bath ( 82 °C) with stirring at 350 rpm. At the end of the reaction, n-decane (0.1 mmol) was added to the catalytic solution as an internal standard, and a 0.1 mL sample was taken, added to a GC vial, and diluted with 2-PrOH (1.3 mL). The products were analyzed on a GC-MS QP 2010 ultra-mass spectrometer equipped with an FID detector. Products were identified using retention times and peak areas from analytically pure reference samples. The reaction yields were calculated by GC using n-decane as an internal standard.

### General method for transfer hydrogenation of ketone using CuI as phosphine scavenger.

An oven-dried 50 mL Schlenk tube containing a stir bar was purged with nitrogen. Complex **1** (10.7 mg, 0.01 mmol, 1 mol%) or **5** (10.8 mg, 0.01 mmol, 1 mol%) and KO<sup>t</sup>Bu (11.2 mg, 0.1 mmol, 10 mol %) were added, followed by freshly-distilled 2-propanol (3 mL), cyclohexanone (103  $\mu$ L, 1.0 mmol) and CuI (9.5 mg, 5 mol%) were added to the reaction vessel, purged with inert gas, and sealed with a septum. The reaction vessel was placed in a preheated oil bath (85 °C) and stirred for 15 minutes. The results of catalysis were analyzed by GC-MS as described above. A pale-yellow precipitate appeared in the reaction with **1** which was filtered, washed with diethyl ether (3X10 mL), and dried under vacuum. The formation of CuI-capped anionic-NHC complex was confirmed by growing crystals of the precipitated complex from acetonitrile/diethyl ether solution (1:1, v/v). The data quality of this structure is not publishable (high Rint and other parameters probably due to mixed halides in the structure and disorder), however, it does confirm the formation of CuI capped anionic-NHC complex.

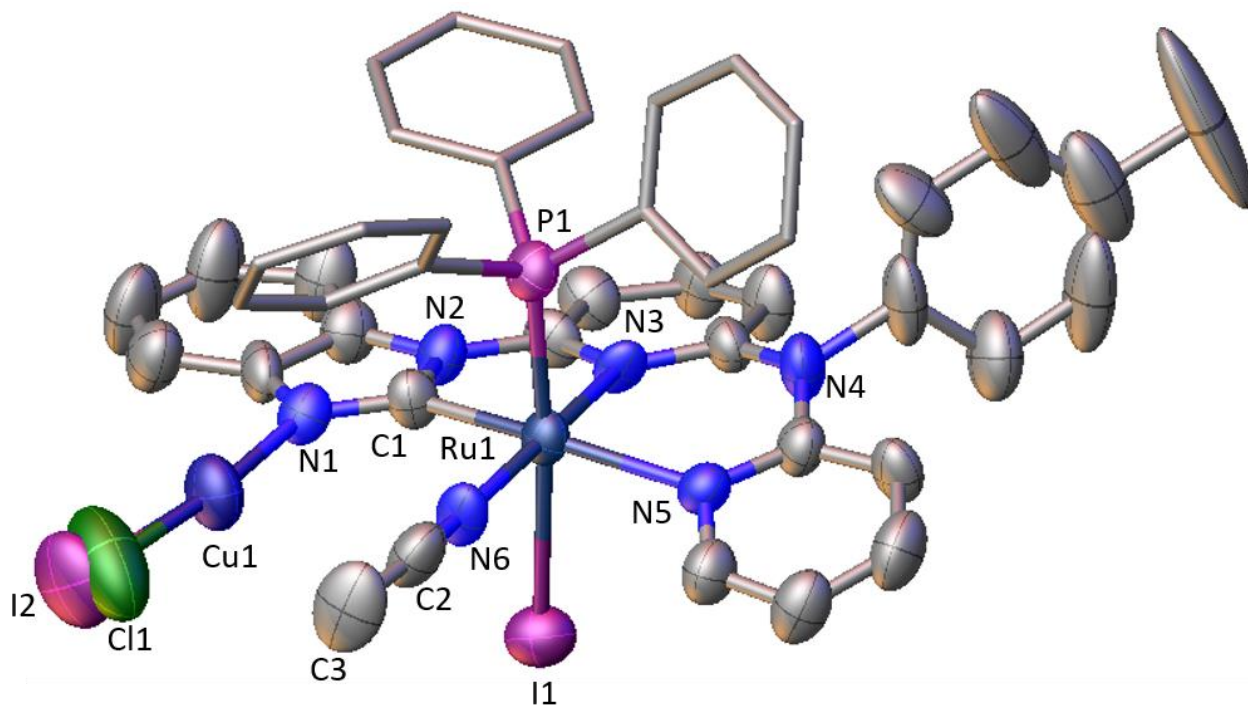

**Figure S48.** Molecular structure of CuI capped anionic NHC complex **1b**.

## Mechanistic investigation of transfer hydrogenation reactions using Mass spectrometry.

**Experiment A:** An oven-dried 50 mL Schlenk tube containing a stir bar was purged with nitrogen. Complex **1** (10.73 mg, 0.01 mmol, 1 mol %) and KO<sup>t</sup>Bu (11.2 mg, 0.1 mmol, 10 mol %) were added, followed by freshly-distilled 2-propanol (3 mL). After that, cyclohexanone (103  $\mu$ L, 1.0 mmol) was added to the reaction vessel, purged with inert gas, and sealed with a septum. The reaction mixture was stirred for 15 minutes at rt. An aliquot was taken at 10 minutes, and a mass spectrogram of the reaction mixture was recorded.

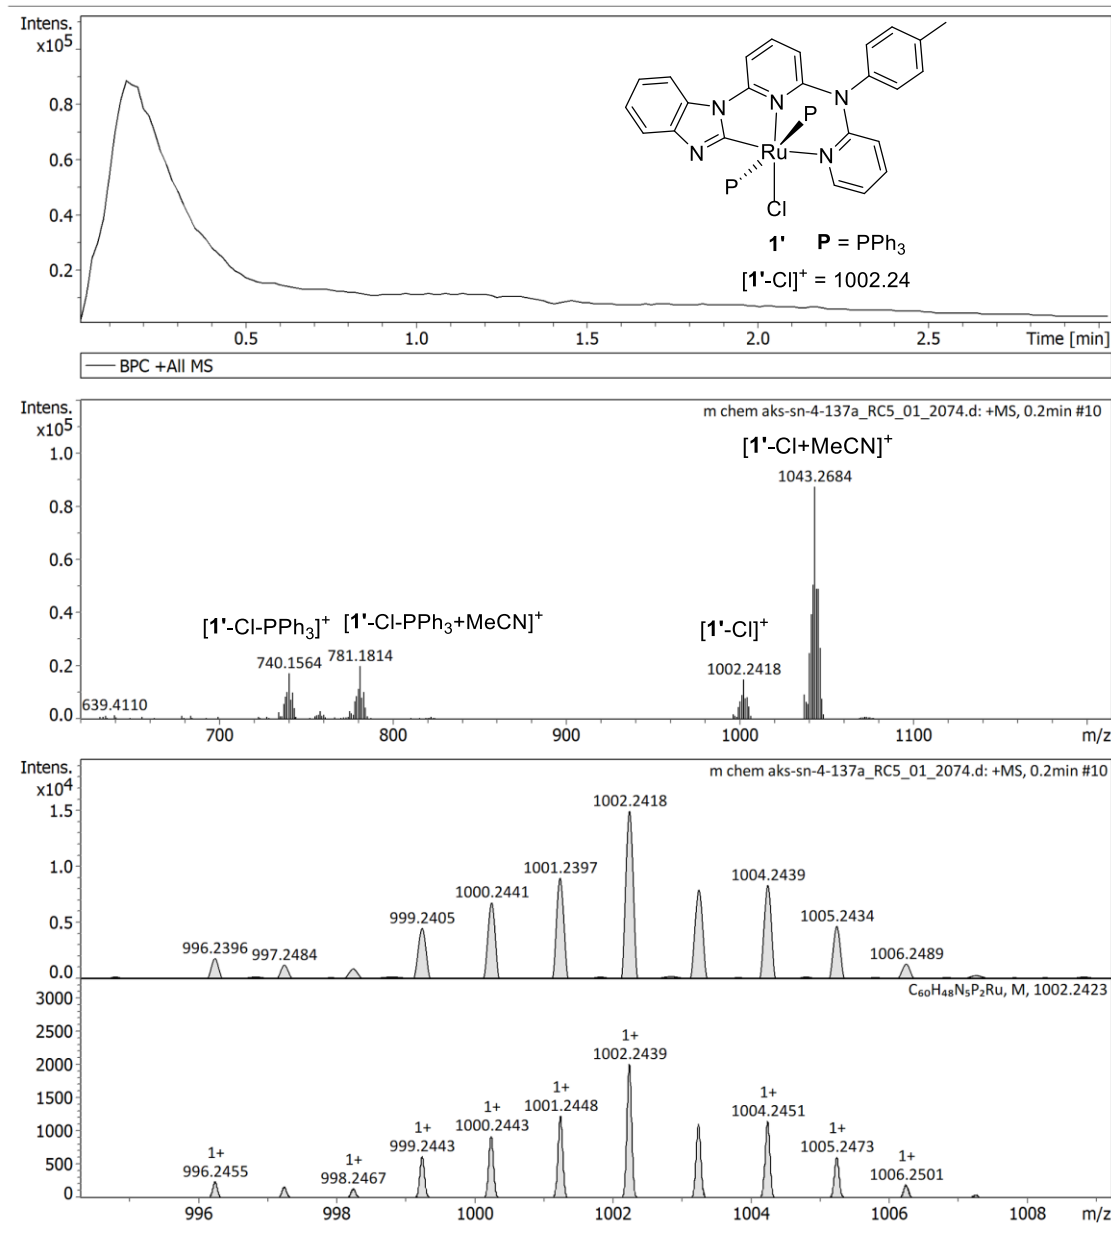

**Figure S49.** HRMS of the catalytic mixture of experiment **A** (MeCN was used for data collection).

**Experiment B:** An oven-dried 50 mL Schlenk tube containing a stir bar was purged with nitrogen. Complex **1** (10.73 mg, 0.01 mmol, 1 mol %) and  $\text{KO}^t\text{Bu}$  (11.2 mg, 0.1 mmol, 10 mol %) were added, followed by freshly-distilled 2-propanol (3 mL). After that, cyclohexanone (103  $\mu\text{L}$ , 1.0 mmol) was added to the reaction vessel and purged with inert gas, and sealed with a septum. The reaction vessel was placed in a preheated oil bath (85  $^\circ\text{C}$ ) and stirred for 15 minutes. An aliquot was taken during the reactions, and a mass spectrogram of the reaction mixture was recorded.

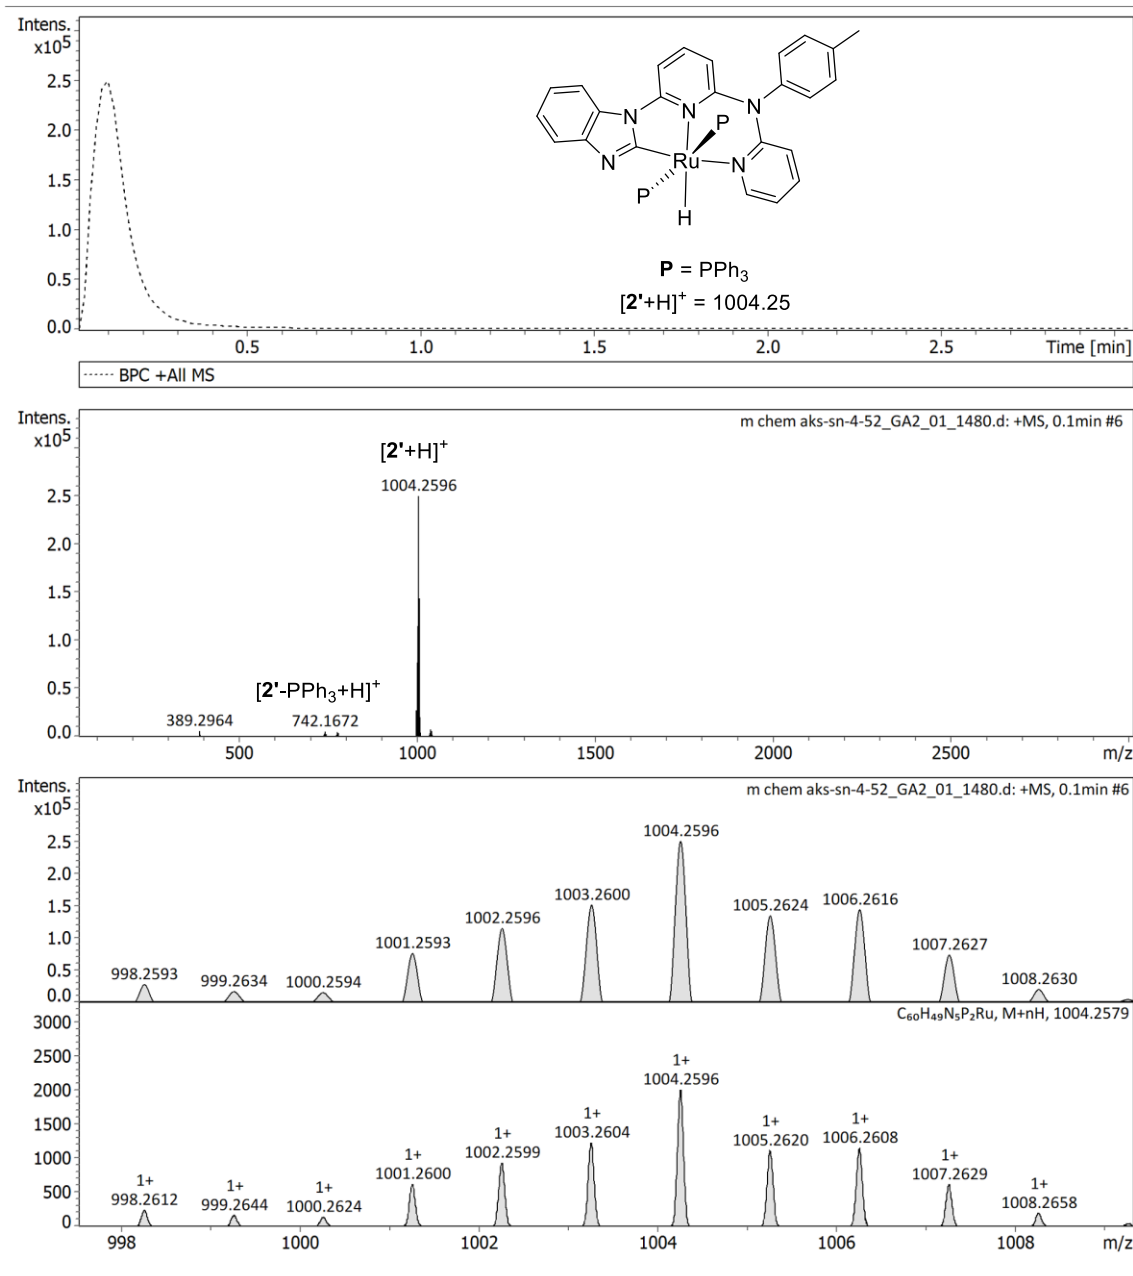

**Figure S50.** HRMS of the catalytic mixture of experiment **B** (MeCN was used for data collection).

## NMR tube experiments for mechanistic investigation of transfer hydrogenation reactions.

**Experiments:** All NMR tube studies were carried out using the glovebox under a nitrogen atmosphere. In situ, NMR reaction progress monitoring was performed in a J Young NMR tube charged with solid complex **1** (43.9 mg, 0.041 mmol) and dissolved in deuterated DMSO (0.5 mL). After that,  $^1\text{H}$  and  $^{31}\text{P}\{^1\text{H}\}$  were recorded using a 500 MHz NMR spectrometer.  $^1\text{H}$  NMR (500 MHz, DMSO- $d_6$ , 25 °C)  $\delta$  14.14 (s, 1H), 13.96 (s, 1H), 9.34 (d,  $J = 5.9$  Hz, 1H), 9.07 (d,  $J = 7.8$  Hz, 1H), 8.13 (d,  $J = 8.4$  Hz, 1H), 7.86 (d,  $J = 8.4$  Hz, 1H), 7.74 (d,  $J = 8.0$  Hz, 1H), 7.72-7.64 (m, 3H), 7.59 (d,  $J = 8.0$  Hz, 1H), 7.52 (t,  $J = 8.2$  Hz, 4H), 7.44 -7.31 (m, 12H), 7.21 (q,  $J = 7.2$  Hz, 17H), 7.13 (s, 14H), 7.07 (d,  $J = 6.9$  Hz, 24H), 6.84 (t,  $J = 6.4$  Hz, 1H), 6.74 (d,  $J = 7.8$  Hz, 2H), 6.51 (d,  $J = 8.8$  Hz, 1H), 6.31- 6.21 (m, 2H), 6.12 (d,  $J = 9.0$  Hz, 1H), 5.75 (d,  $J = 7.2$  Hz, 1H), 2.45 (s, 6H).  $^{31}\text{P}\{^1\text{H}\}$  NMR (202 MHz, DMSO- $d_6$ , 25 °C)  $\delta$  33.65, 25.09, -6.00.

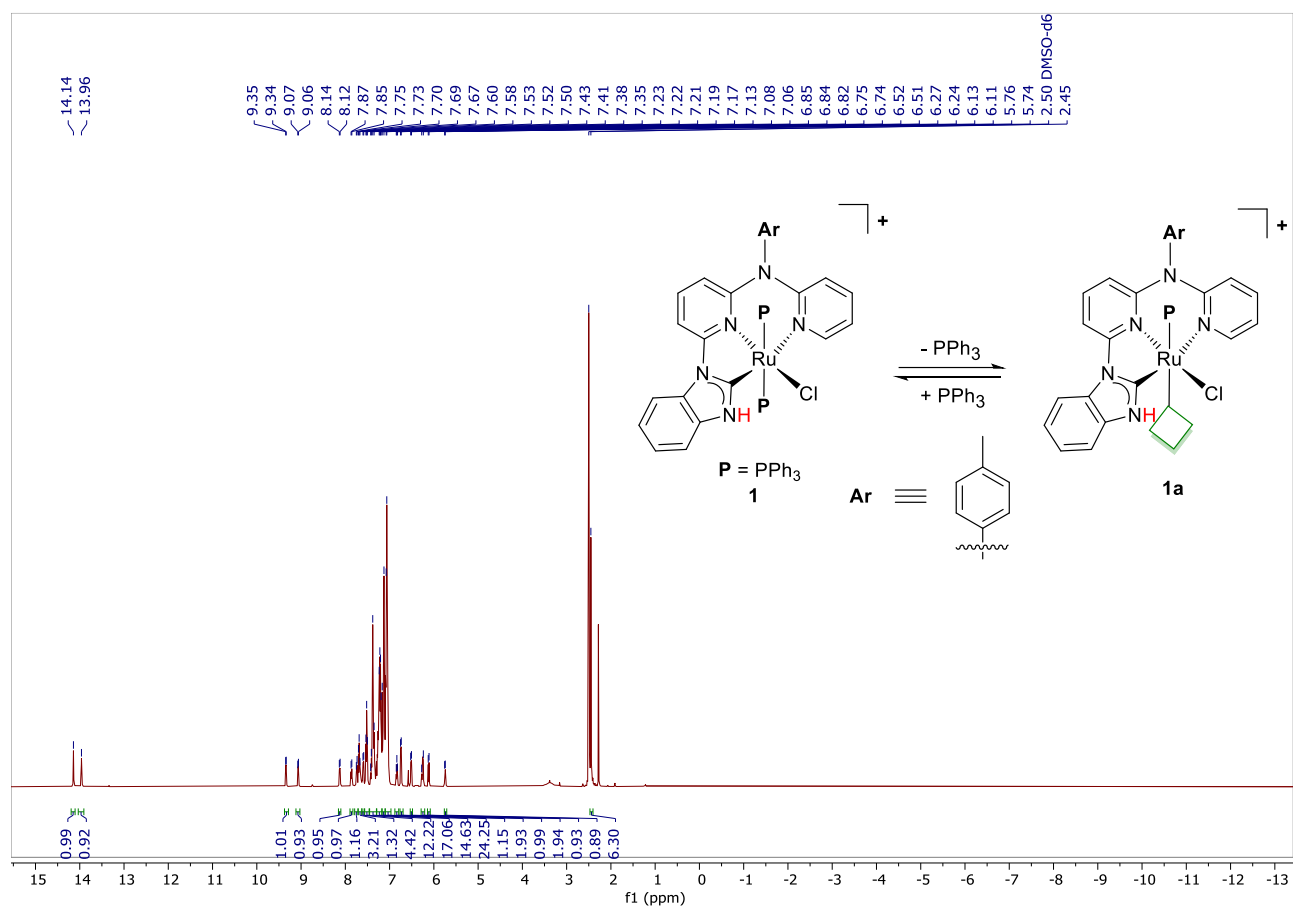

Figure S51.  $^1\text{H}$  NMR spectrum of **1** in DMSO- $d_6$  before adding a base.

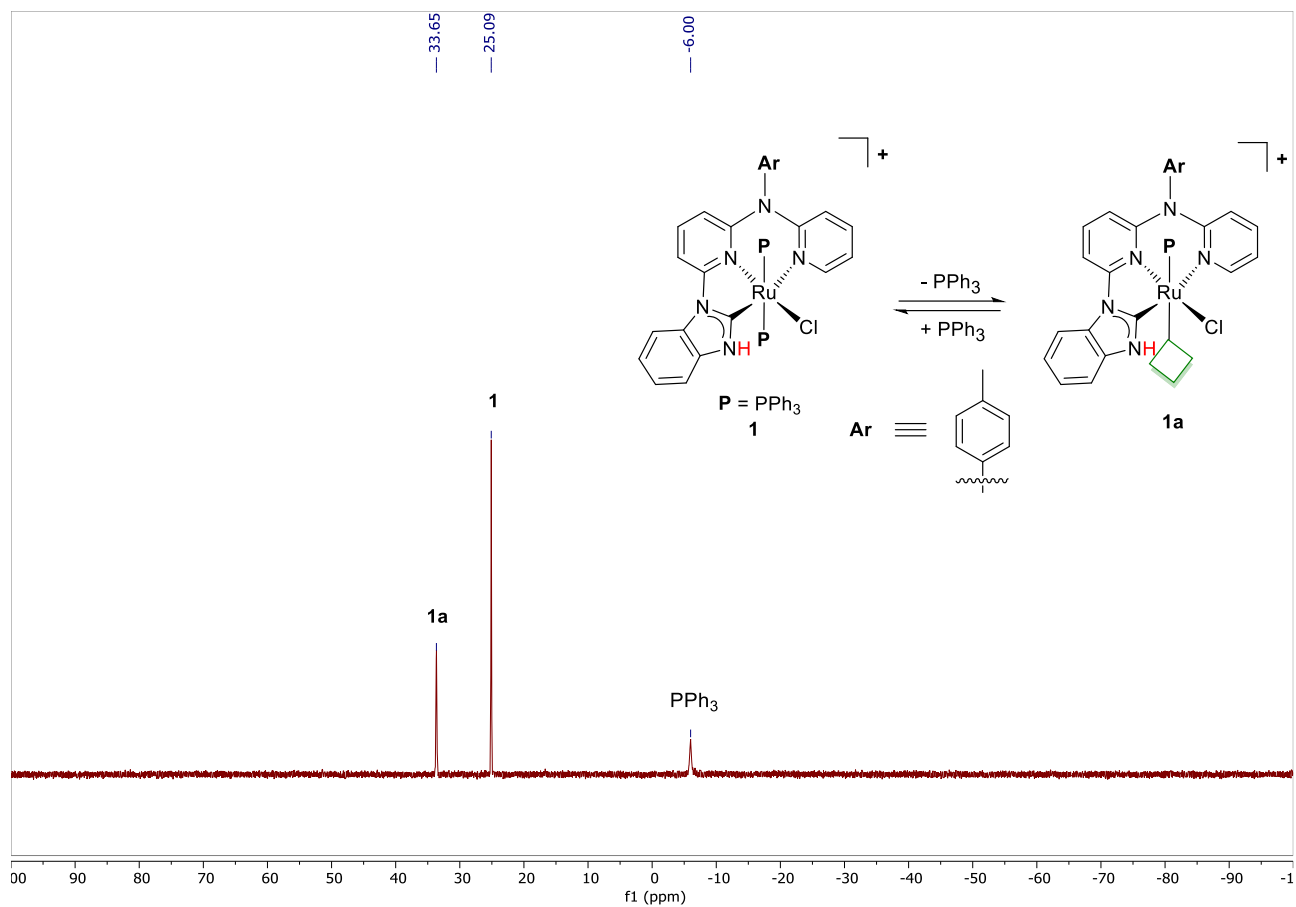

Figure S52.  $^{31}\text{P}\{^1\text{H}\}$  NMR spectrum of **1** in  $\text{DMSO-d}_6$  before adding base.

**Step 1: In situ generation of 1' and 1a':** After NMR analysis of complex **1**, the equimolar amount KO<sup>t</sup>Bu (4.59 mg, 0.041 mmol) was added to the J Young NMR tube, and an orange-red solution was formed immediately. The NMR tube was sealed with a Teflon screw-cap to ensure air tightness and shaken prior to recording the NMR.

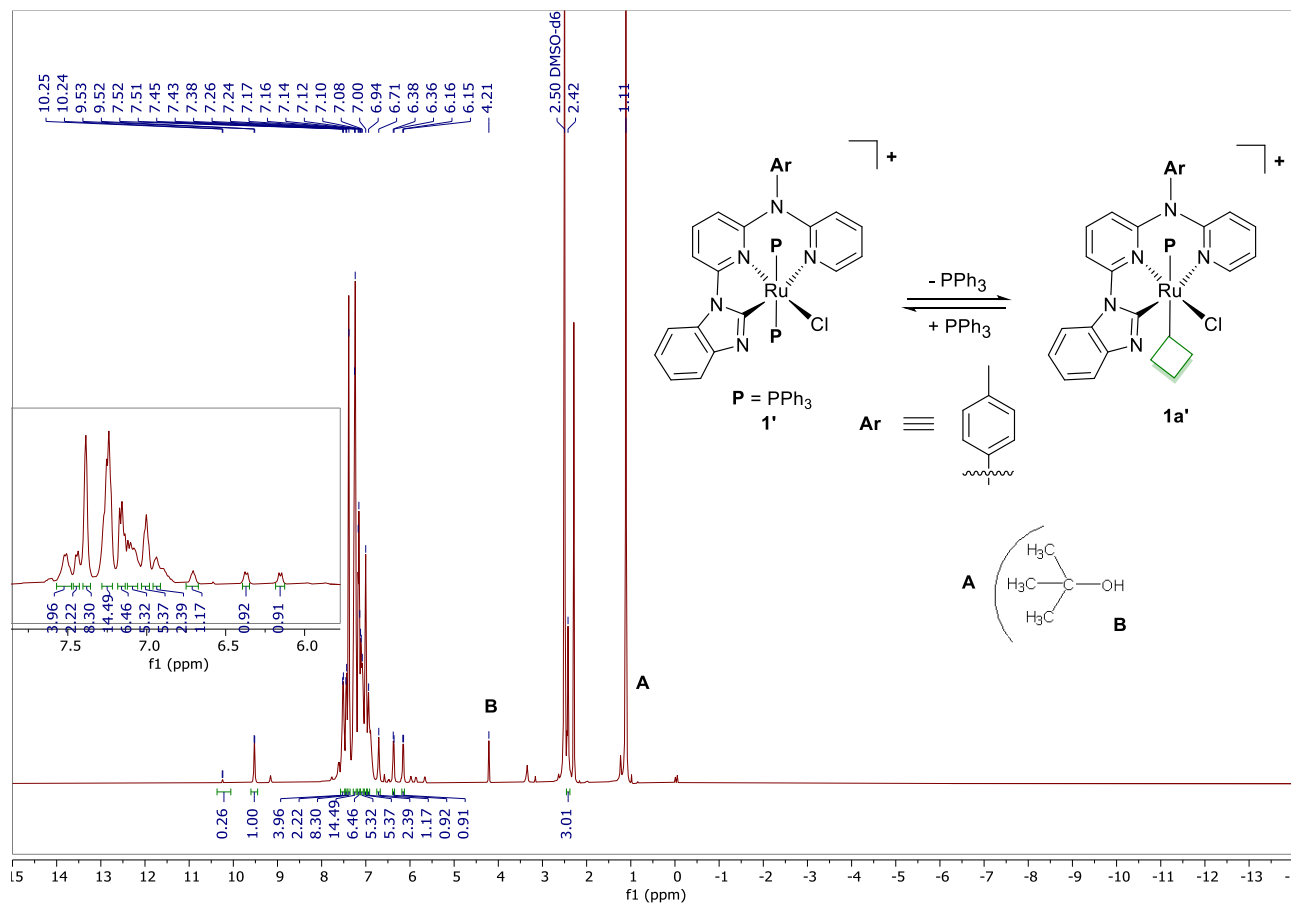

**Figure S53.** <sup>1</sup>H NMR spectrum after adding 1 equiv. of KO<sup>t</sup>Bu.



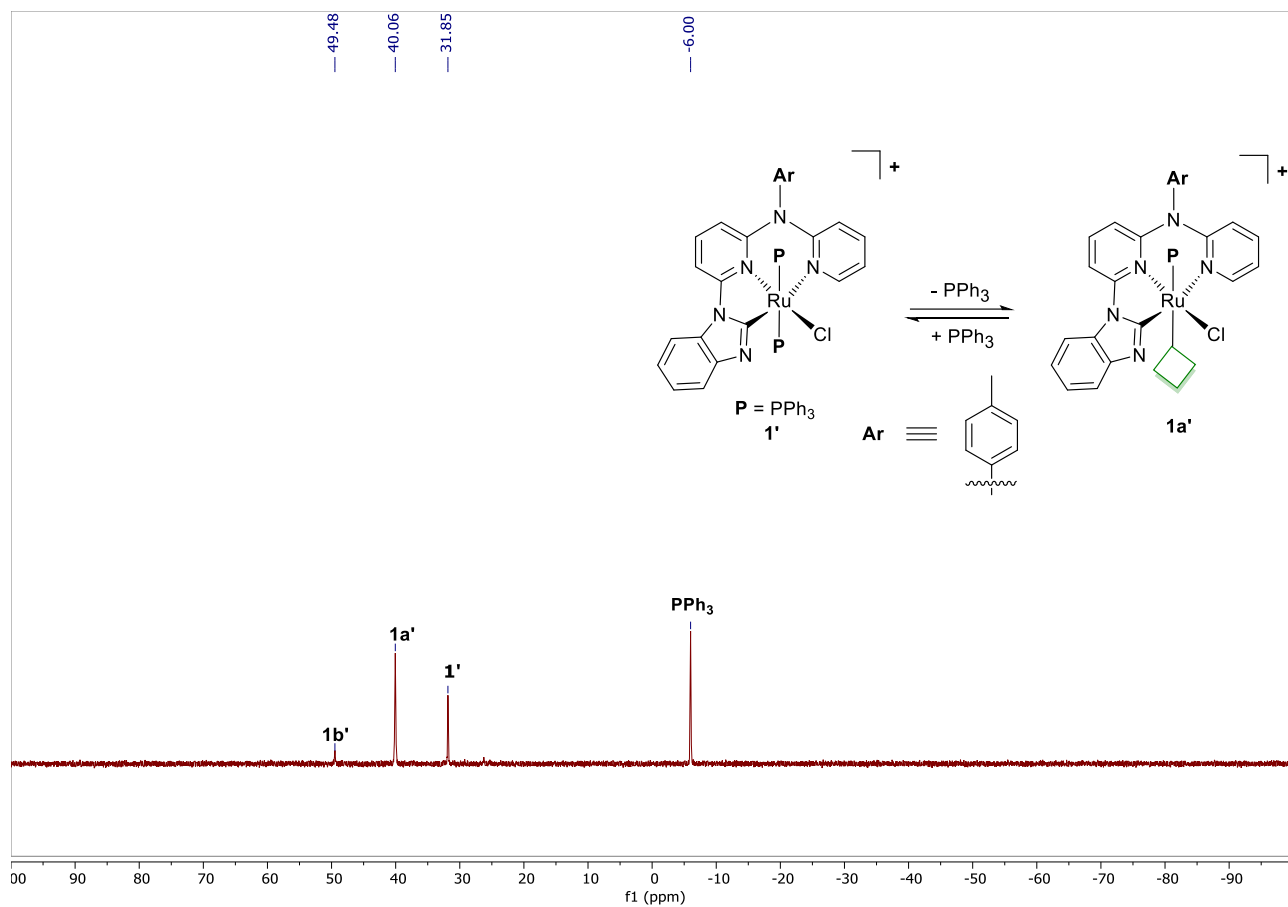

Figure S54.  $^{31}\text{P}$   $\{^1\text{H}\}$  NMR spectrum after adding 1 equiv.  $\text{KO}^t\text{Bu}$ .

**Step 2: In situ no regeneration of complex 1:** In the next step, 5 equiv. of 2-propanol was added to the J. Young NMR tube, The tube was sealed with a Teflon screw-cap to ensure air tightness and was vigorously shaken before being allowed to stand overnight at room temperature. The resulting reaction was monitored on a 500 MHz NMR spectrometer. The  $^1\text{H}$  NMR spectrum did not show any regeneration of the NH proton.  $^1\text{H}$  and  $^{31}\text{P}\{^1\text{H}\}$  NMR spectra showed no significant change in the chemical shifts of their respective signals.

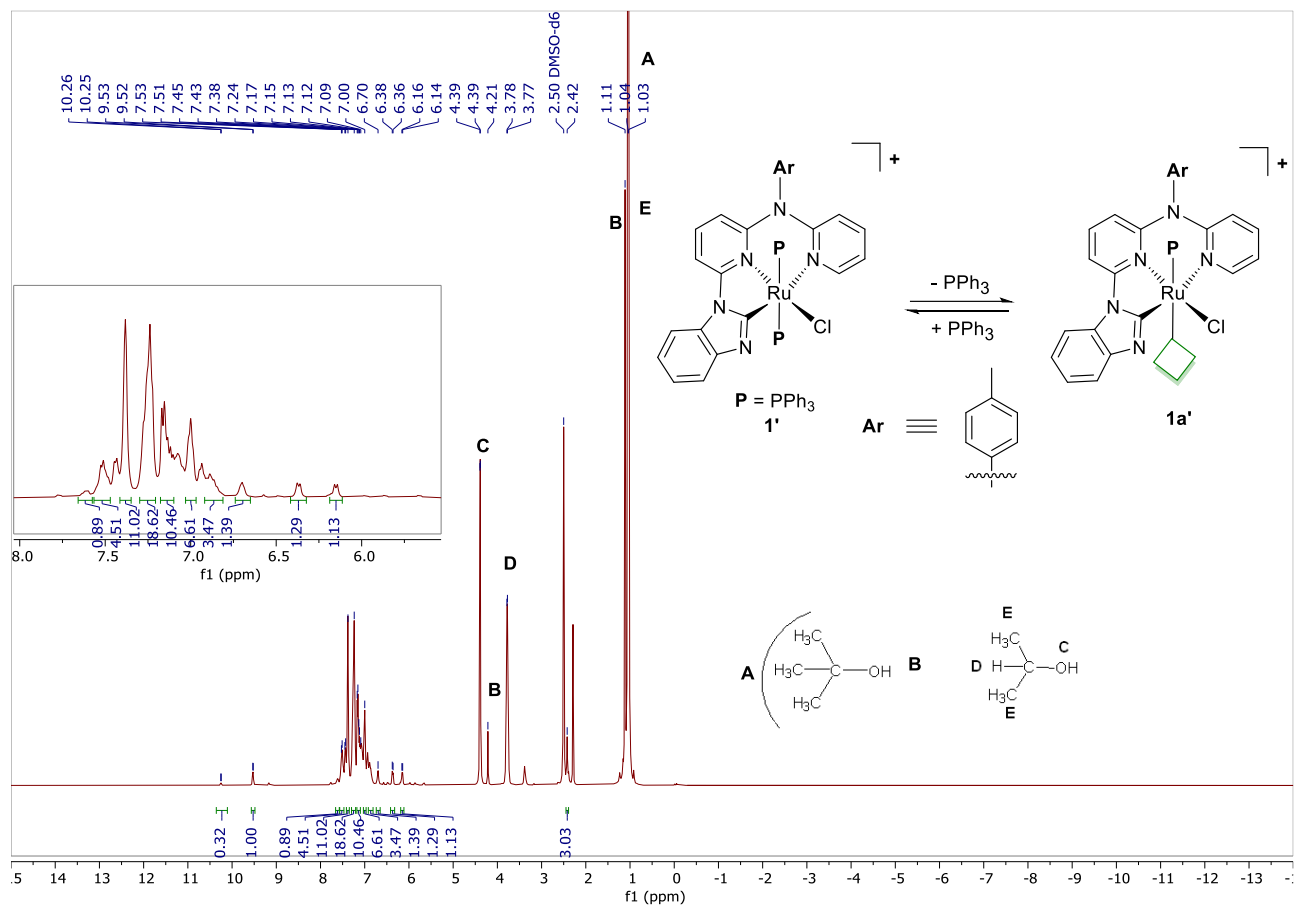

**Figure S55.**  $^1\text{H}$  NMR spectrum after adding 5 equiv. 2-propanol.

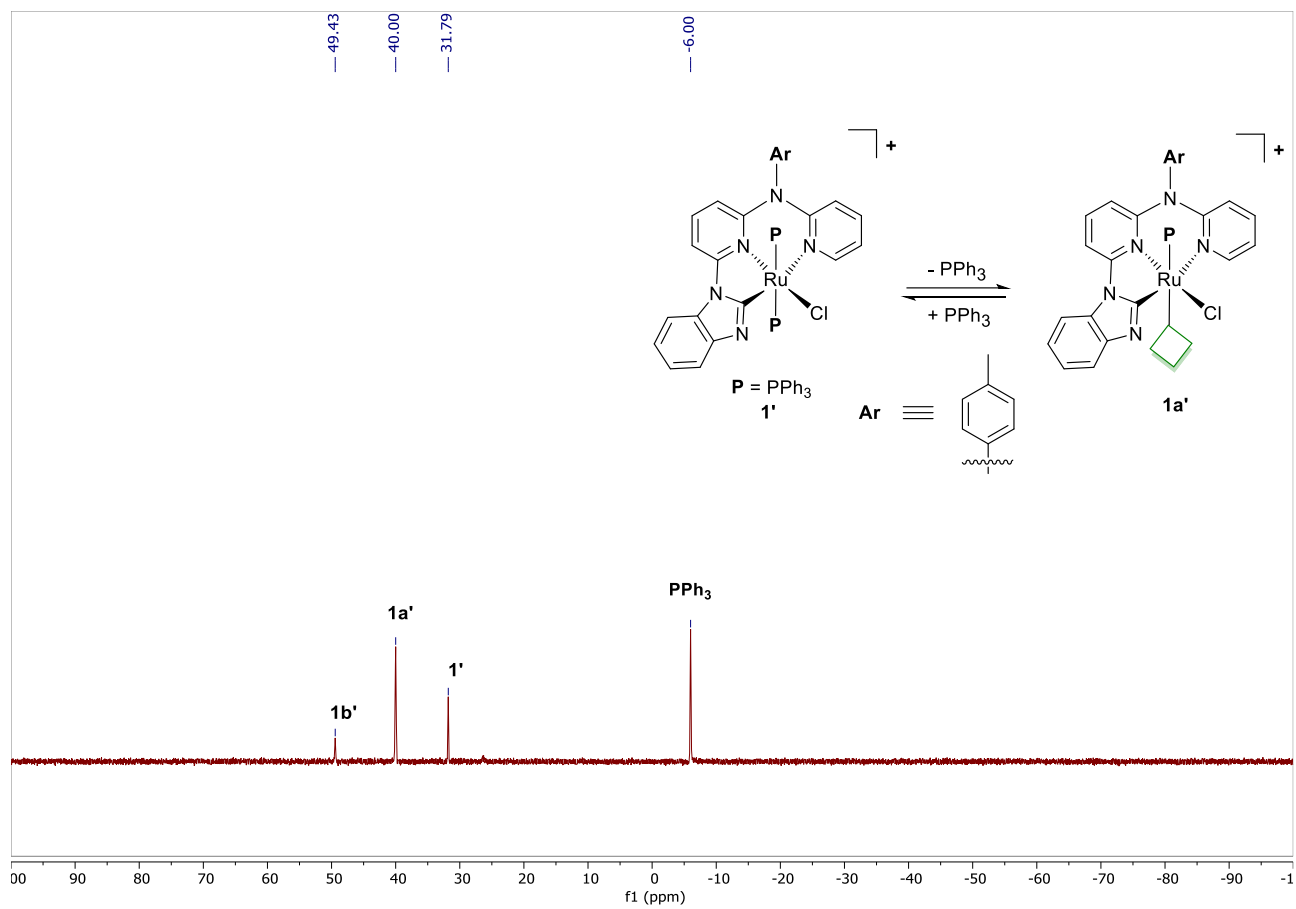

**Figure S56.**  $^{31}\text{P}\{^1\text{H}\}$  NMR spectrum after adding 5 equiv. 2-propanol.

**Step 3: In situ generation of 2' and 2a'.** In the J Young NMR tube, the mixture was heated at 82 °C for 1 h and allowed to cool to room temperature. The extent of the reaction was monitored by NMR analysis.

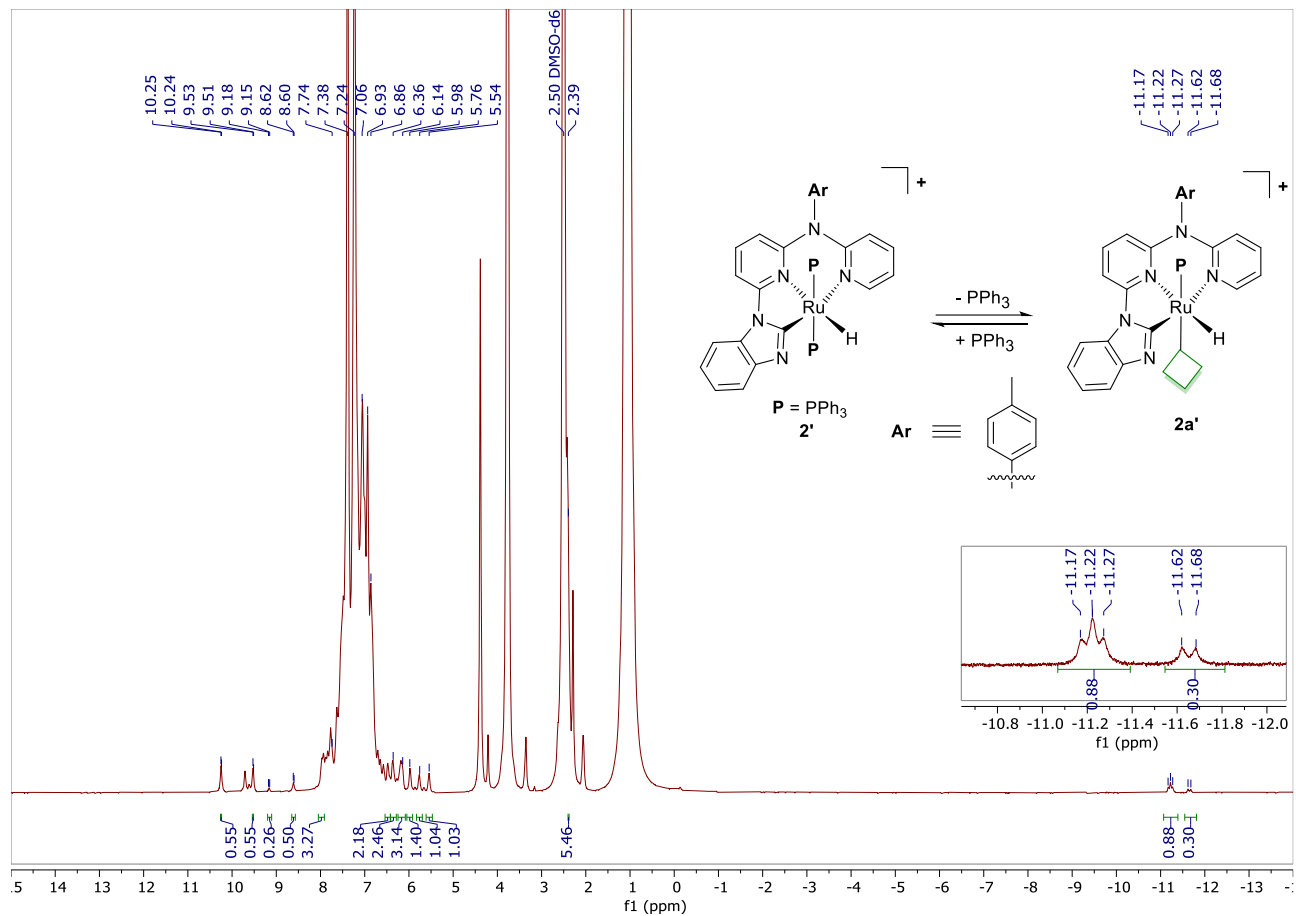

**Figure S57.** <sup>1</sup>H NMR spectrum after heating at 85 °C for 1 h.

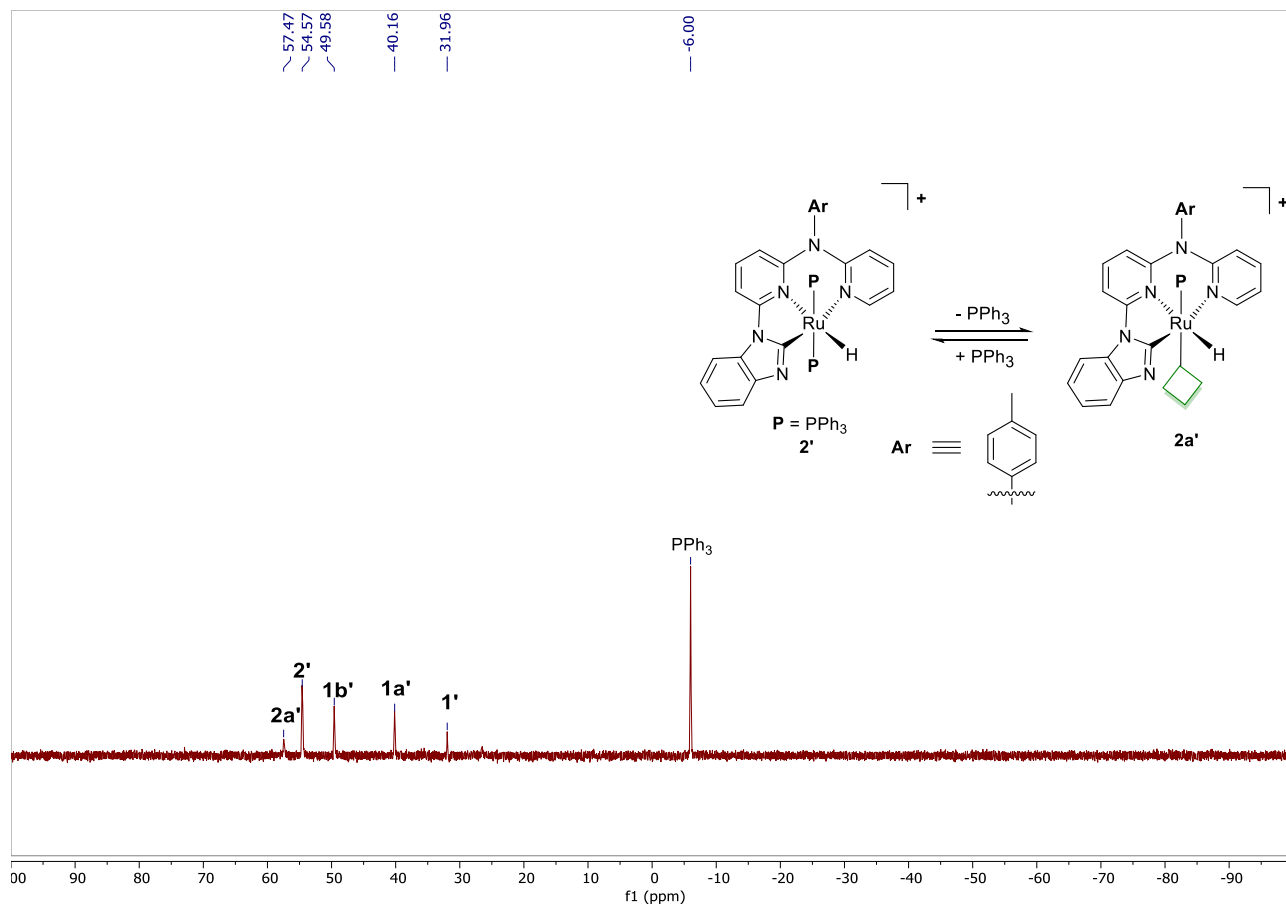

**Figure S58.**  $^{31}\text{P}\{^1\text{H}\}$  NMR spectrum after heating at 85 °C for 1 h.

**NMR tube experiments to evaluate the effect of excess triphenyl phosphine:** In an  $\text{N}_2$  glovebox, a J-Young tube was charged with complex **1** (50.0 mg, 0.046 mmol) dissolved in  $\text{DMSO-d}_6$  (0.5 mL). Then, the J-Young tube was sealed, and the NMR data was analyzed. After that, the J-Young tube was returned to the glove box, and  $\text{PPh}_3$  (120.52 mg, 0.46 mmol, 10 equiv) was added to the solution. The tube was again sealed, and the mixture- was sonicated and NMR was recorded.

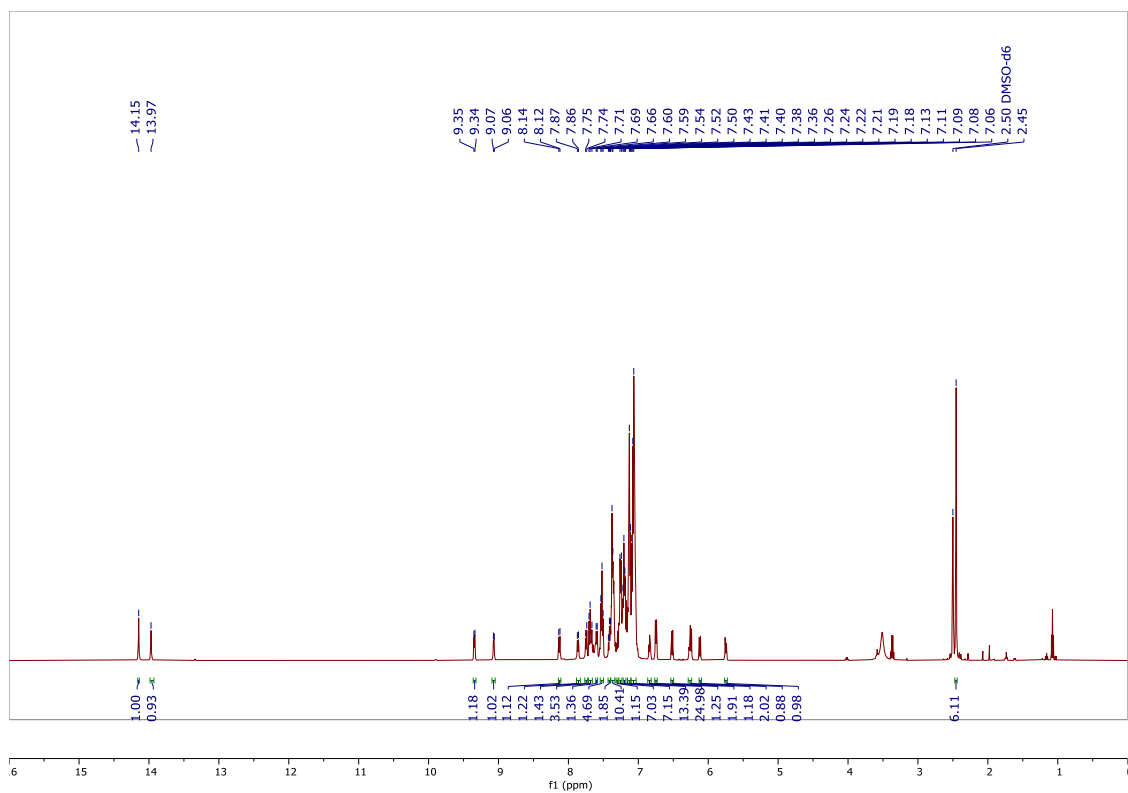

Figure S59.  $^1\text{H}$  NMR spectrum of **1** before adding 10 equiv. of  $\text{PPh}_3$ .

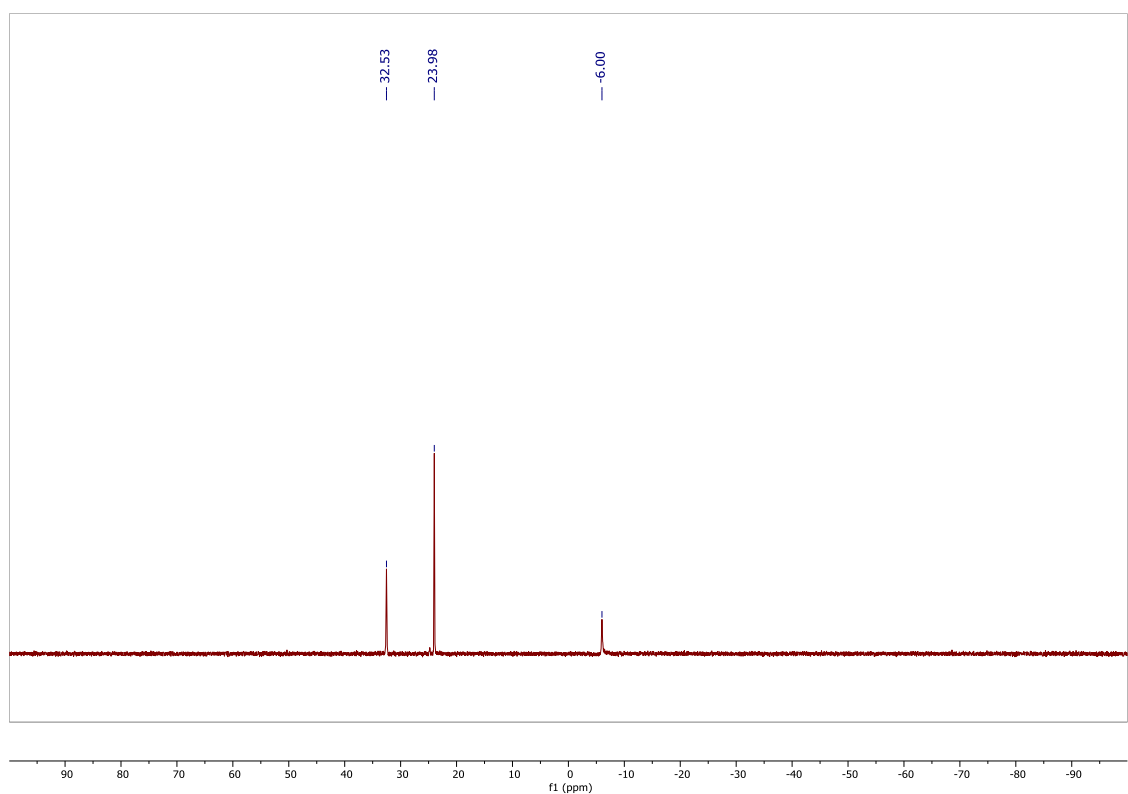

Figure S60.  $^{31}\text{P}\{^1\text{H}\}$  NMR spectrum **1** before adding 10 equiv. of  $\text{PPh}_3$ .

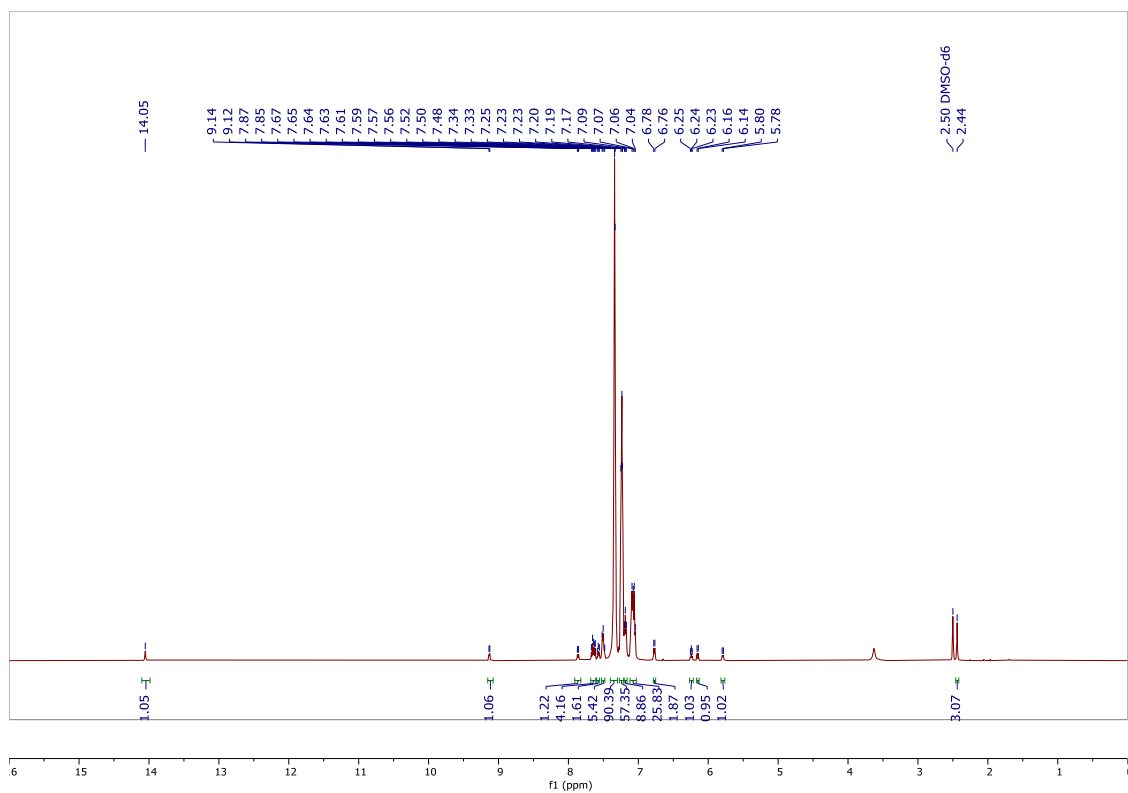

Figure S61.  $^1\text{H}$  NMR spectrum of **1** after adding 10 equiv. of  $\text{PPh}_3$ .

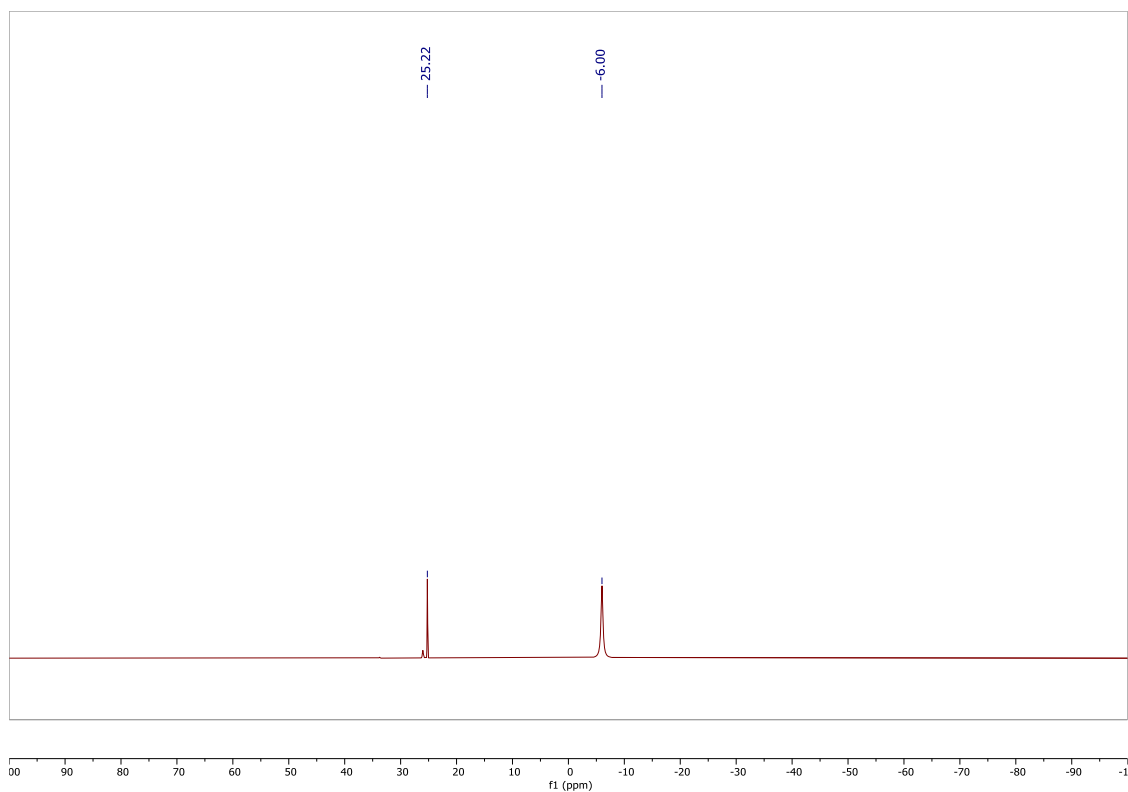

Figure S62.  $^{31}\text{P}\{^1\text{H}\}$  NMR spectrum of **1** after adding 10 equiv. of  $\text{PPh}_3$ .

**Computational investigation for the plausible mechanism of the transfer hydrogenation of ketone using Ru(II) complexes.** DFT calculations were carried out with the help of the ORCA 4.2.1 software package. Geometry optimizations were performed with the BP86 GGA functional and Ahlrichs def2-TZVP with def2 ECP on Ru, def2 -TZVP(-f) on P, and def2 SVP on all other atoms. Resolution of identity (RI) with their corresponding auxiliary basis set, def2/J, to speed up the calculation.<sup>4</sup> Dispersion corrections were applied in accordance with Grimme's D3 scheme and Beck-Johnson damping (D3BJ).<sup>5</sup> The grids used were "grid3", final grid 5, and "grid X5". By performing analytical frequency calculations at the same level as the DFT method, stationary points were confirmed to have either no imaginary frequency (for reactant and intermediate) or only one in imaginary frequency along with reaction coordinate (for TS). Following the frequency calculation, the thermochemical properties were calculated at 298.15K. To estimate the solvation energies, single-point calculation was performed according to the SMD model using 2-propanol.<sup>6</sup> For final energy calculation, single-point calculations were performed using a higher basis set def2-QZVP with def2 -ECP on Ru atom, def2-TZVP on P, and def2-TZVP(-f) on all other atoms (BS2) using the PBE0 hybrid GGA functional. For the final Gibbs free energy calculations, the electronic energy from the final single point calculation at PBE0/BS2 level was corrected for the total correction (G-Eel) obtained at BP86/BS1 level, solvation energy obtained at BP86(SMD)/BS1 level and standard state conversion from 1 atm pressure to 1M solution at 298.15 K. The Gibbs free energies are reported in kcal/mol.

### **DFT optimized structures**

For the geometry optimization of complexes **1-2**(including its anionic complexes **1'-2'**) and **5-6**, the bulky p-tolyl group on nitrogen was replaced with hydrogen atom reduce the computational cost. The p-tolyl group being far away from the Ru center, is expected to have minimal effect on the catalyst. After the structural modifications, these optimized geometries were renamed as **1-dft**, **1'-dft**, **2-dft**, **2'-dft**, **5-dft** and **6-dft**. The structural parameters for these complexes were in good agreement with the X-ray diffraction structures.



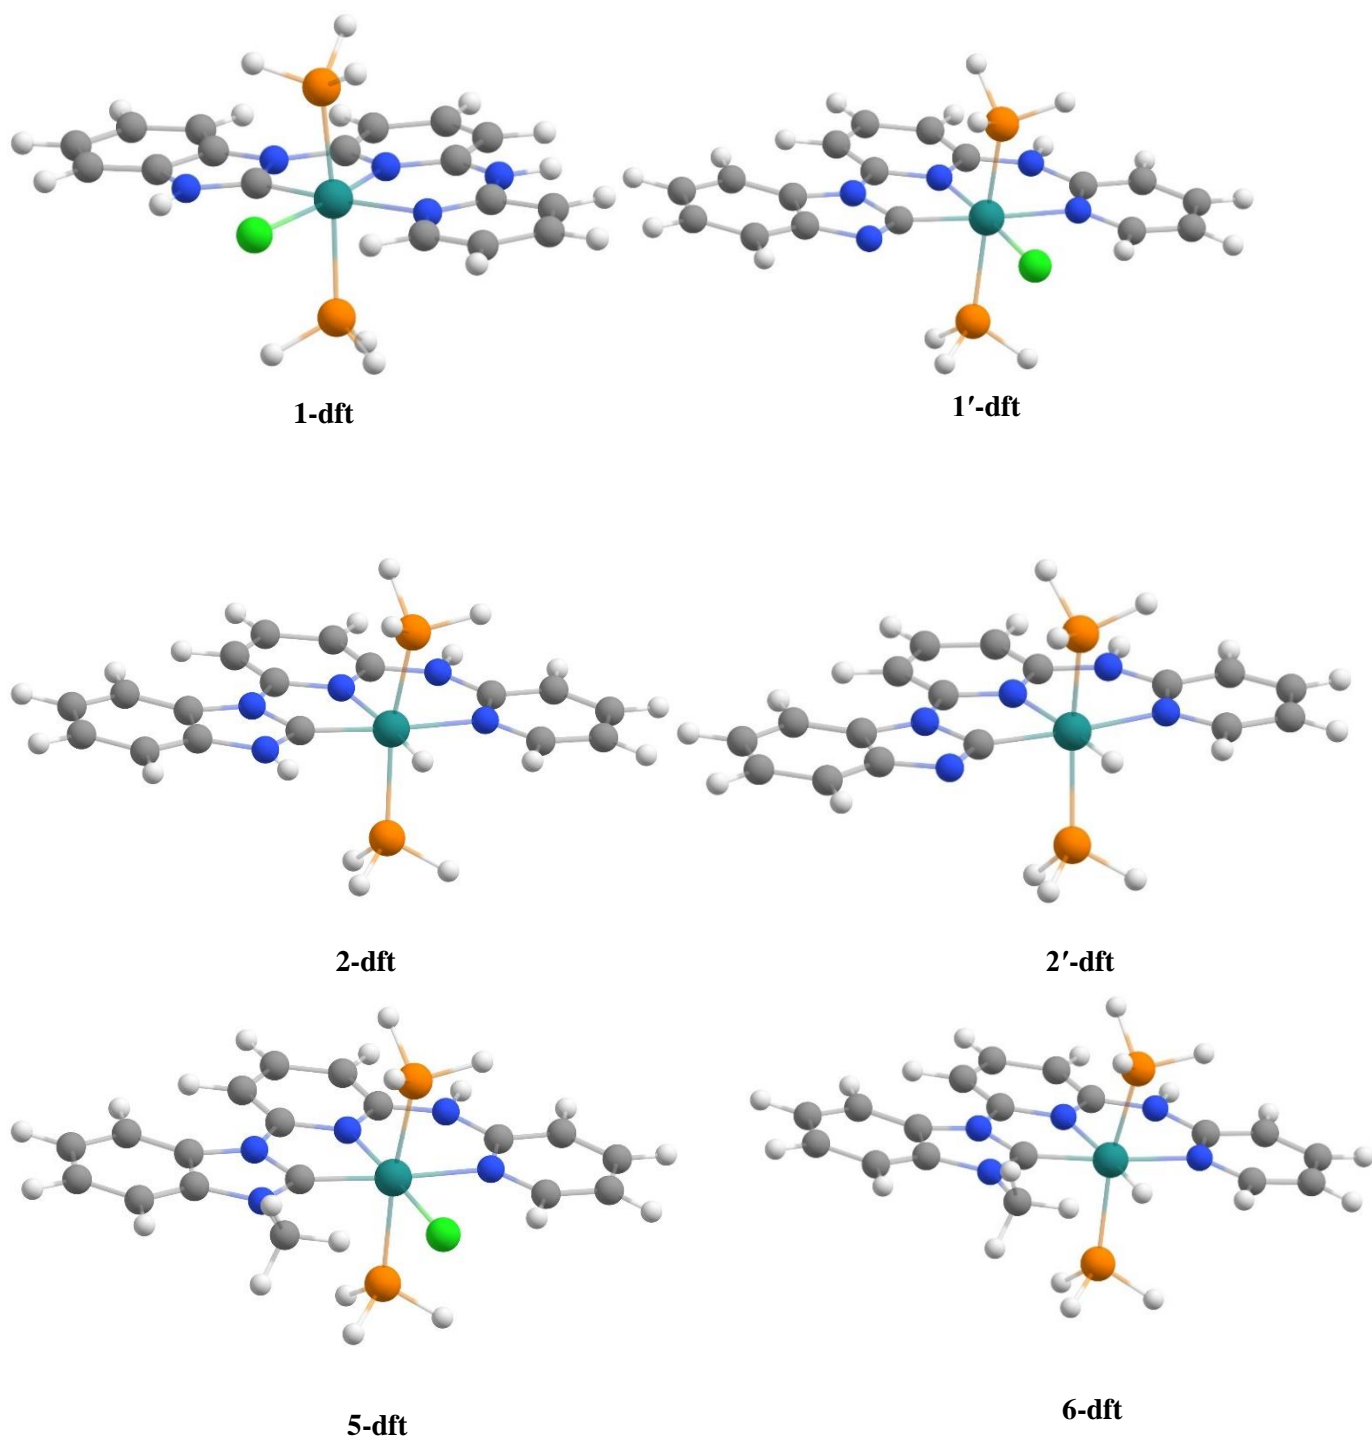

**Figure S63.** The important optimized structure of 1-dft, 1'-dft, 2-dft, 2'-dft, 5-dft and 6-dft.

Calculated energy profile for TH using complex **5**:

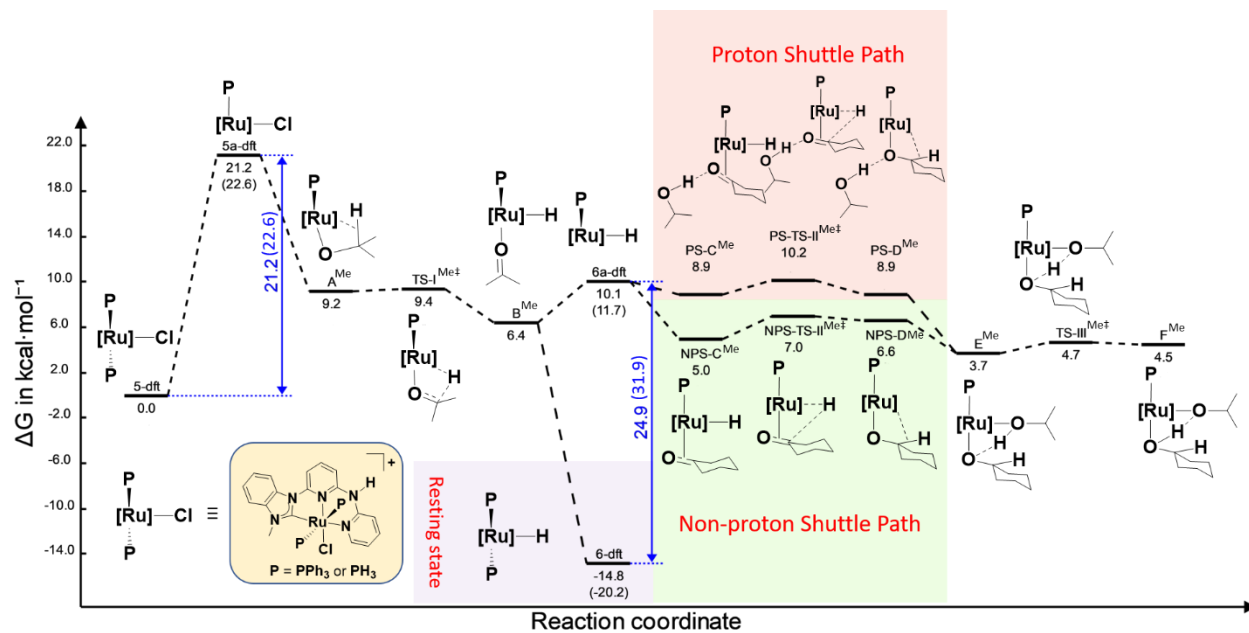

**Figure S64.** Calculated Gibbs free energy profile showing dissociation of phosphine ( $\text{PPh}_3$  and  $\text{PH}_3$  are displayed by **P** in the formula for clarity) and comparison between the energy of proton shuttle and non-proton shuttle paths in transfer hydrogenation of cyclohexanone to cyclohexanol by classical-NHC complex **5**. The values of Gibbs free energy (in  $\text{Kcal mol}^{-1}$ ) in brackets correspond to the calculation with the  $\text{PPh}_3$  ligand.

## References

- 1 O. V. Dolomanov, L. J. Bourhis, R. J. Gildea, J. A. K. Howard and H. Puschmann, *J. Appl. Cryst.*, 2009, **42**, 339-341.
- 2 G. M. Sheldrick, *Acta Cryst. A*, 2008, **64**, 112-122.
- 3 G. M. Sheldrick, *Acta Cryst. Sect. Found. Adv.*, 2015, **71**, 3-8.
- 4 J. M. Guevara-Vela, T. Rocha-Rinza and Á. M. Pendás, *Theor. Chem. Acc.*, 2017, **136**, 57.
- 5 L. Goerigk, in *Non-Covalent Interactions in Quantum Chemistry and Physics*, Elsevier, 2017, pp. 195-219.
- 6 J. Zhang, H. Zhang, T. Wu, Q. Wang and D. Van Der Spoel, *J. Chem. Theory Comput.*, 2017, **13**, 1034-1043.

## Calibration curve

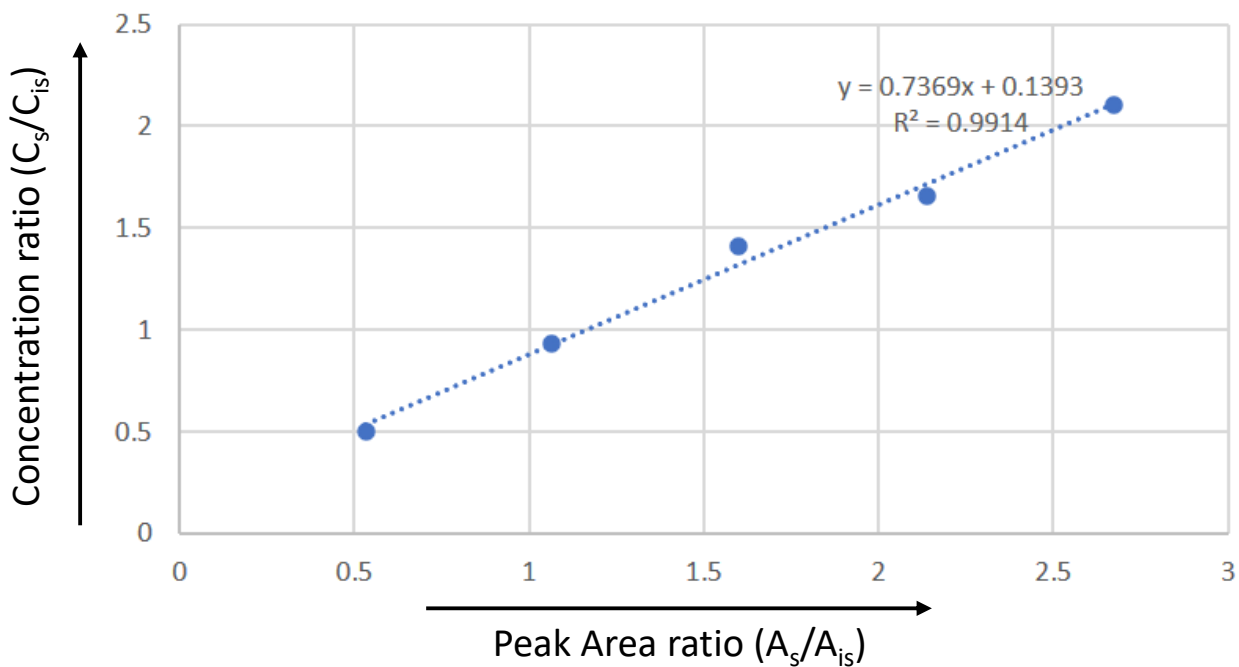

**GCMS of data for catalyst screening for the transfer hydrogenation of cyclohexanone (Table 1)**

**Entry 1**

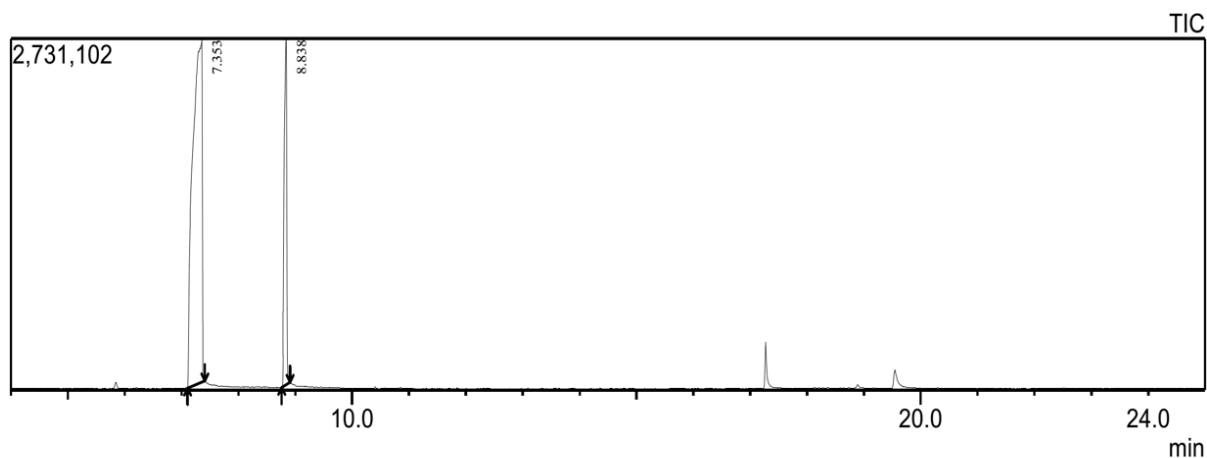

Peak Report TIC

| Peak# | R.Time | Area     | Area%  | Height  | Height% | A/H   | Name         |
|-------|--------|----------|--------|---------|---------|-------|--------------|
| 1     | 7.353  | 10404150 | 79.00  | 2657481 | 49.72   | 11.44 | Cyclohexanol |
| 2     | 8.838  | 8081406  | 21.00  | 2687791 | 50.28   | 3.01  | Decane       |
|       |        | 8485556  | 100.00 | 5345272 | 100.00  |       |              |

Line#:1 R.Time:7.355(Scan#:672)

MassPeaks:307

RawMode:Averaged 7.350-7.360(671-673) BasePeak:57(683424)

BG Mode:Calc. from Peak Group 1 - Event 1 Scan

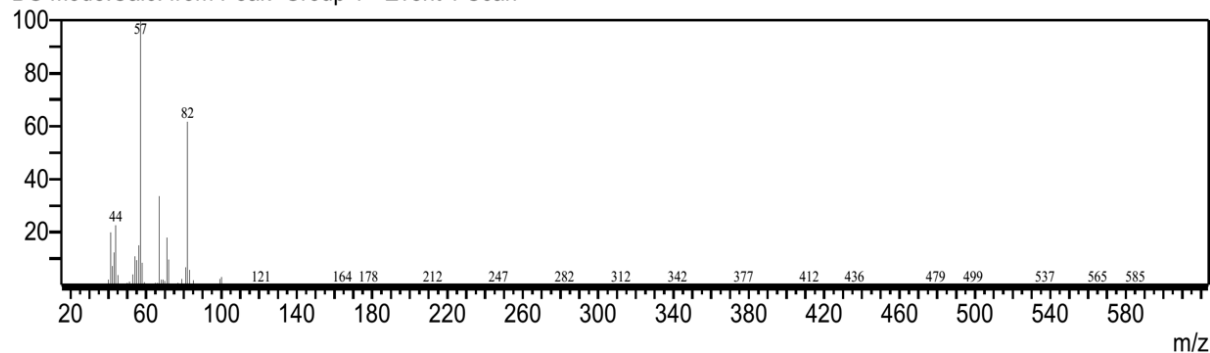

Entry 2

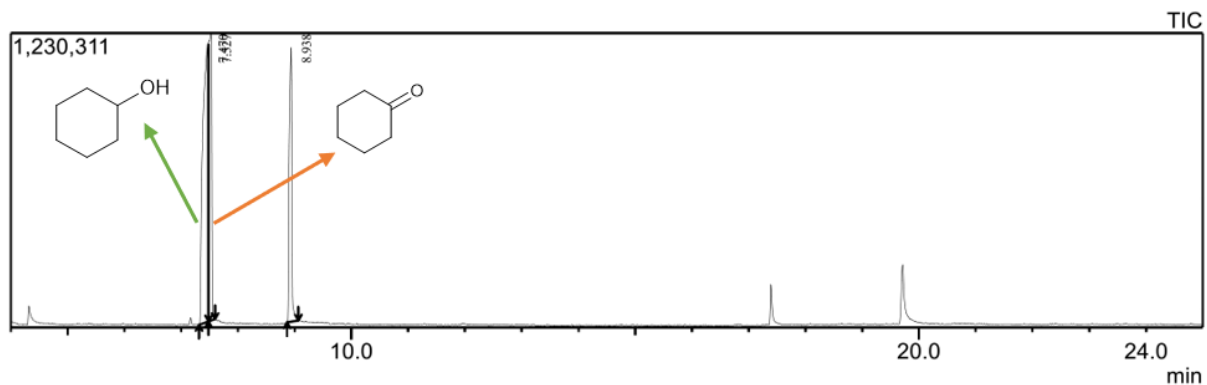

Peak Report TIC

| Peak# | R.Time | Area    | Area%  | Height  | Height% | A/H  | Name          |
|-------|--------|---------|--------|---------|---------|------|---------------|
| 1     | 7.470  | 7766528 | 49.68  | 1162930 | 33.14   | 6.68 | Cyclohexanol  |
| 2     | 7.527  | 4356119 | 27.87  | 1200477 | 34.21   | 3.63 | Cyclohexanone |
| 3     | 8.938  | 3509492 | 22.45  | 1145771 | 32.65   | 3.06 | Decane        |
|       |        | 5632139 | 100.00 | 3509178 | 100.00  |      |               |

Line#:1 R.Time:7.470(Scan#:695)

MassPeaks:307

RawMode:Averaged 7.465-7.475(694-696) BasePeak:57(19096)

BG Mode:Calc. from Peak Group 1 - Event 1 Scan

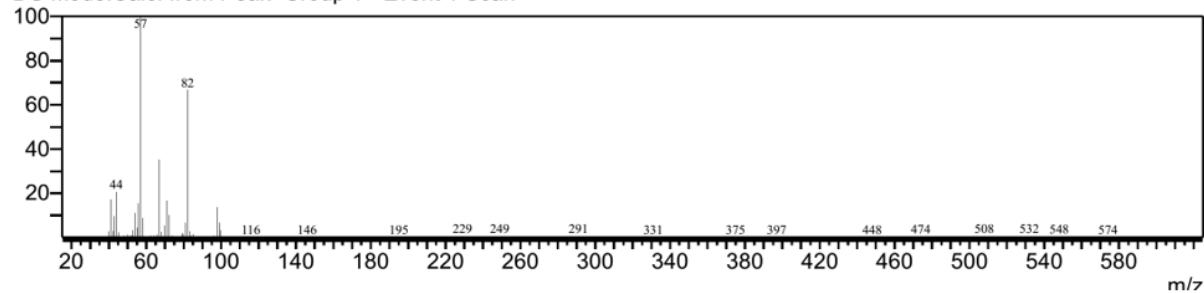

Line#:2 R.Time:7.525(Scan#:706)

MassPeaks:282

RawMode:Averaged 7.520-7.530(705-707) BasePeak:55(124228)

BG Mode:Calc. from Peak Group 1 - Event 1 Scan

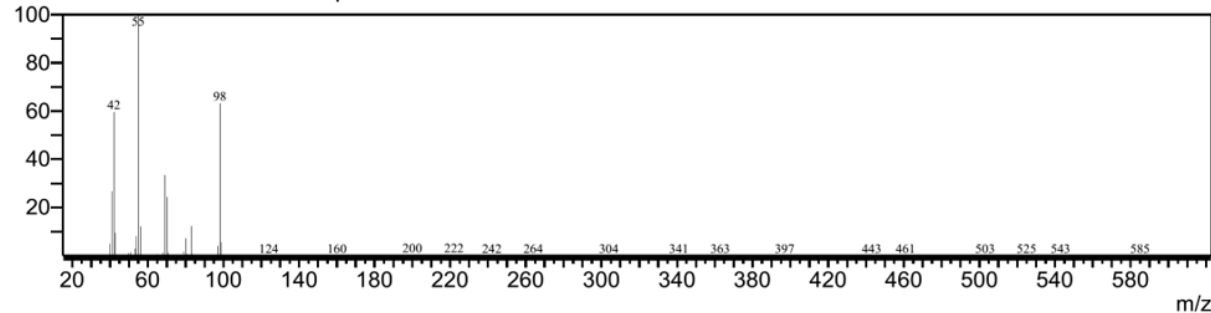

Entry 3

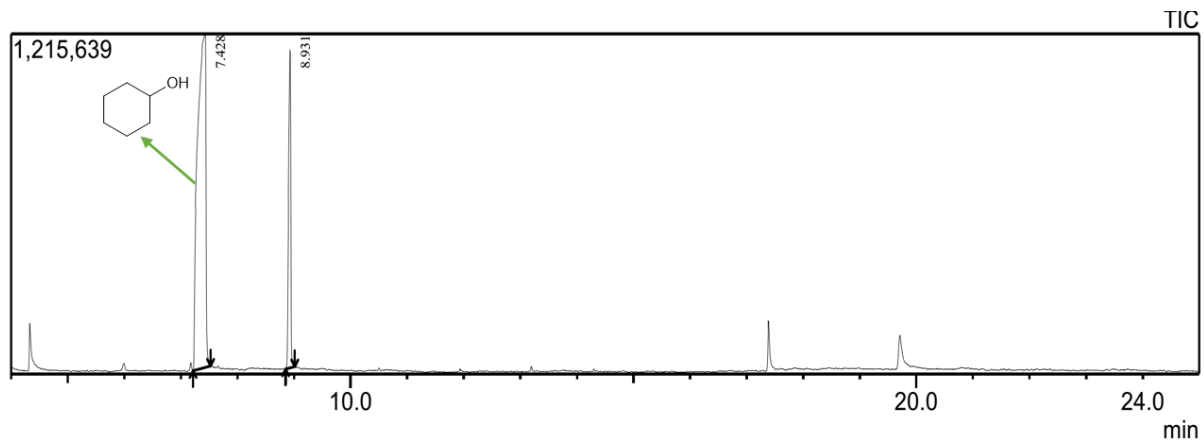

Peak Report TIC

| Peak# | R.Time | Area    | Area%  | Height  | Height% | A/H   | Name         |
|-------|--------|---------|--------|---------|---------|-------|--------------|
| 1     | 7.428  | 2045105 | 79.44  | 1190965 | 51.16   | 10.11 | Cyclohexanol |
| 2     | 8.931  | 3117356 | 20.56  | 1136795 | 48.84   | 2.74  | Decane       |
|       |        | 5162461 | 100.00 | 2327760 | 100.00  |       |              |

Line#:1 R.Time:7.430(Scan#:687)

MassPeaks:285

RawMode:Averaged 7.425-7.435(686-688) BasePeak:57(303983)

BG Mode:Calc. from Peak Group 1 - Event 1 Scan

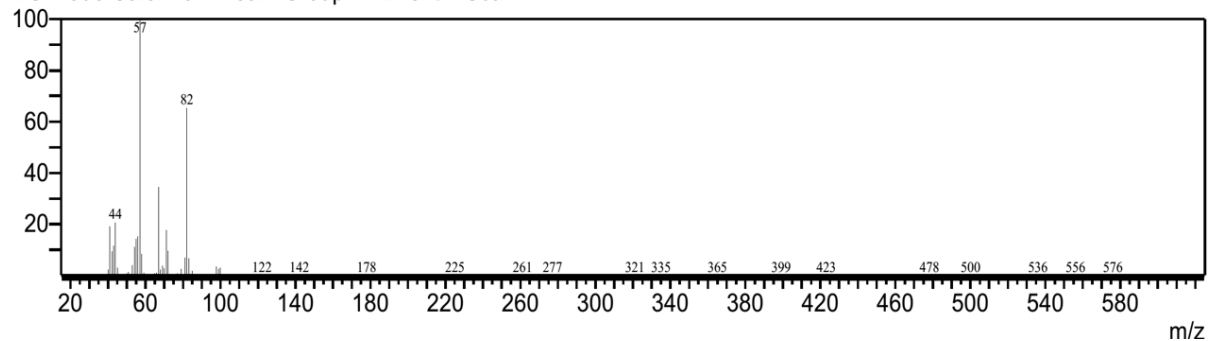

Entry 4

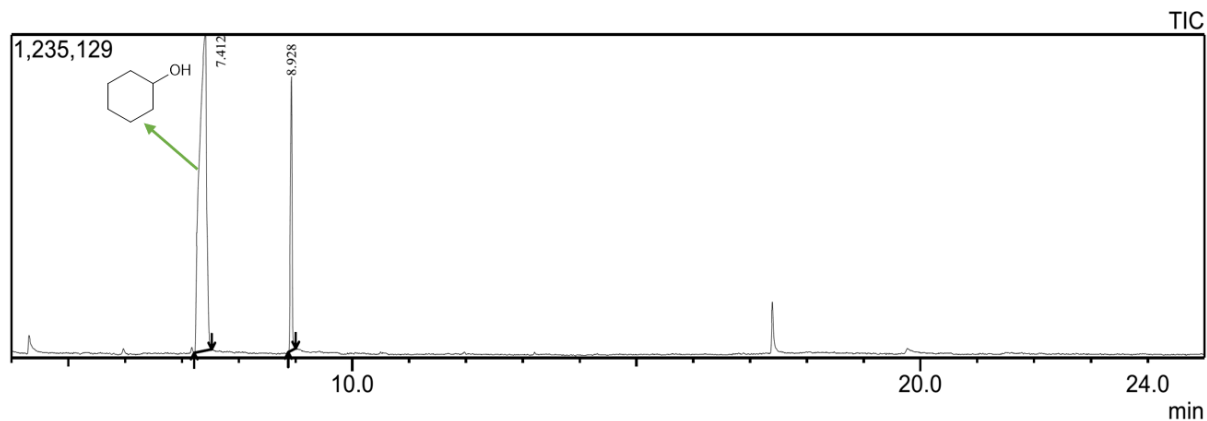

Peak Report TIC

| Peak# | R.Time | Area    | Area%  | Height  | Height% | A/H  | Name         |
|-------|--------|---------|--------|---------|---------|------|--------------|
| 1     | 7.412  | 0635183 | 82.57  | 1206645 | 53.58   | 8.81 | Cyclohexanol |
| 2     | 8.928  | 2244937 | 17.43  | 1045478 | 46.42   | 2.15 | Decane       |
|       |        | 2880120 | 100.00 | 2252123 | 100.00  |      |              |

Line#:1 R.Time:7.410(Scan#:683)

MassPeaks:226

RawMode:Averaged 7.405-7.415(682-684) BasePeak:57(290242)

BG Mode:Calc. from Peak Group 1 - Event 1 Scan

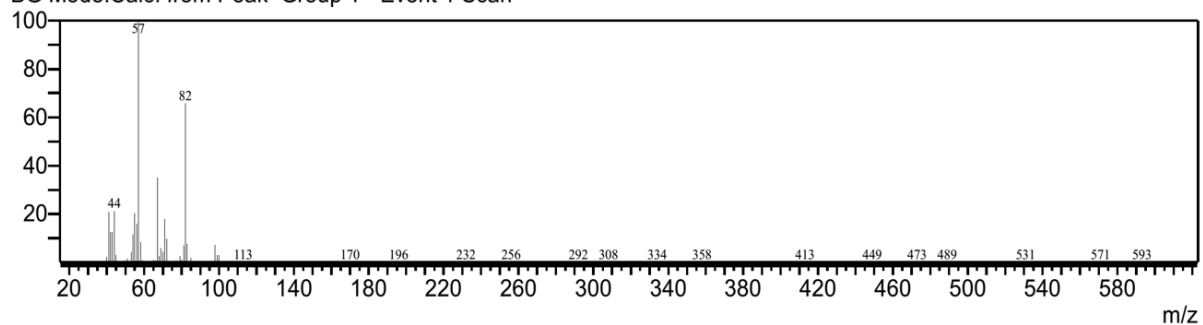

Entry 5

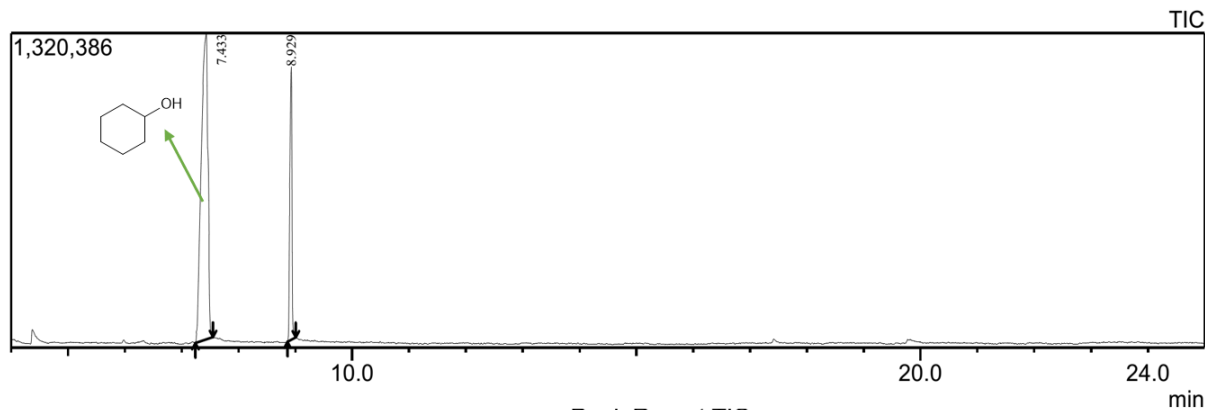

Peak Report TIC

| Peak# | R.Time | Area    | Area%  | Height  | Height% | A/H  | Name         |
|-------|--------|---------|--------|---------|---------|------|--------------|
| 1     | 7.433  | 0484852 | 77.34  | 1284251 | 52.86   | 8.16 | Cyclohexanol |
| 2     | 8.929  | 3072818 | 22.66  | 1145472 | 47.14   | 2.68 | Decane       |
|       |        | 3557670 | 100.00 | 2429723 | 100.00  |      |              |

Line#:1 R.Time:7.430(Scan#:687)  
 MassPeaks:318  
 RawMode:Averaged 7.425-7.435(686-688) BasePeak:57(283343)  
 BG Mode:Calc. from Peak Group 1 - Event 1 Scan

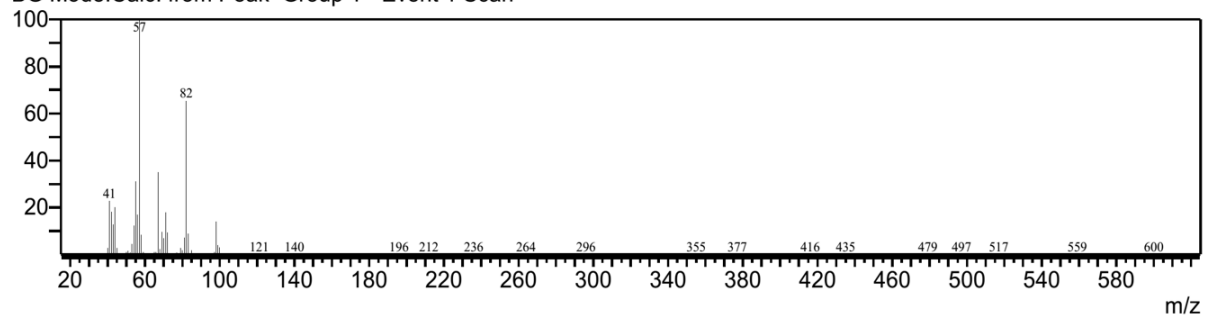



Entry 6

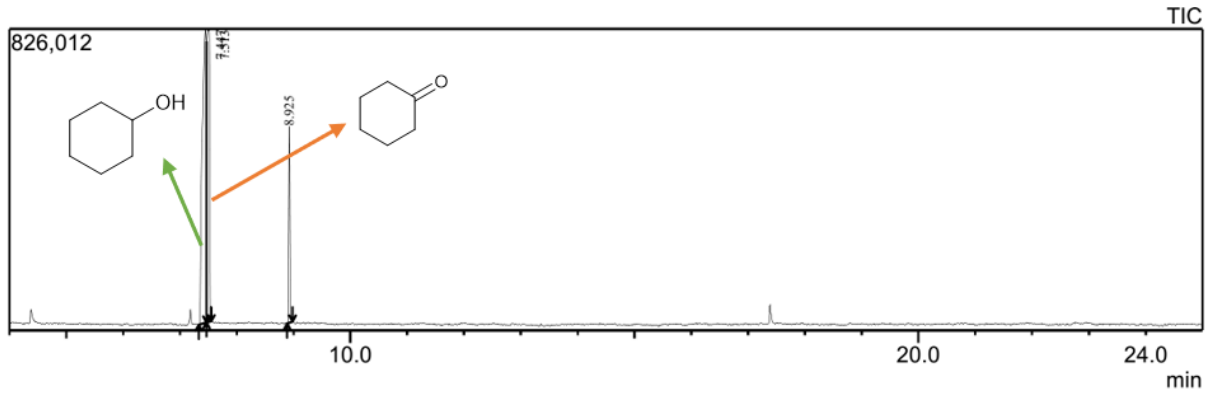

Peak Report TIC

| Peak# | R.Time | Area    | Area%  | Height  | Height% | A/H  | Name          |
|-------|--------|---------|--------|---------|---------|------|---------------|
| 1     | 7.447  | 3938880 | 52.53  | 803580  | 37.49   | 4.90 | Cyclohexanol  |
| 2     | 7.513  | 2798607 | 37.33  | 801603  | 37.40   | 3.49 | Cyclohexanone |
| 3     | 8.925  | 760347  | 10.14  | 538290  | 25.11   | 1.41 | Decane        |
|       |        | 7497834 | 100.00 | 2143473 | 100.00  |      |               |

Line#:1 R.Time:7.445(Scan#:690)  
 MassPeaks:294  
 RawMode:Averaged 7.440-7.450(689-691) BasePeak:57(66930)  
 BG Mode:Calc. from Peak Group 1 - Event 1 Scan

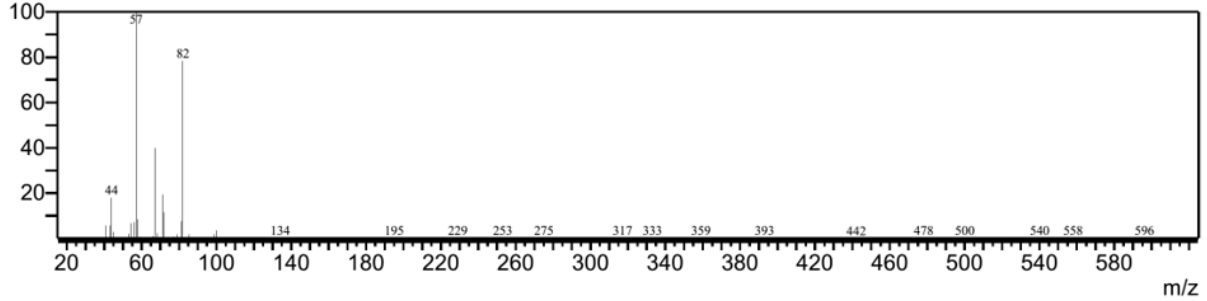

Line#:2 R.Time:7.515(Scan#:704)  
 MassPeaks:270  
 RawMode:Averaged 7.510-7.520(703-705) BasePeak:55(108652)  
 BG Mode:Calc. from Peak Group 1 - Event 1 Scan

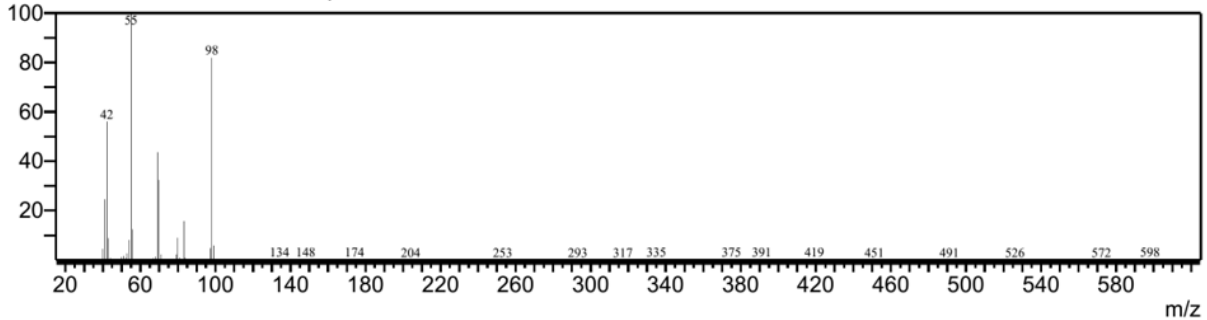

Entry 7

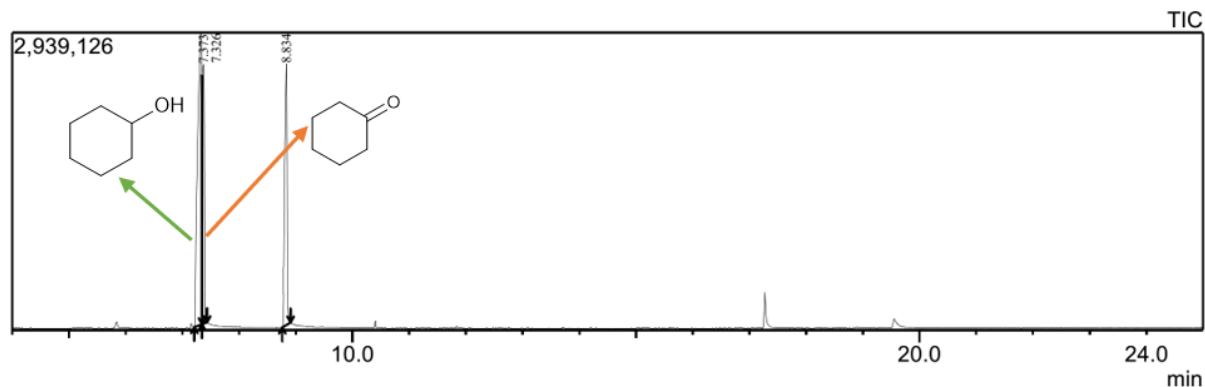

Peak Report TIC

| Peak# | R.Time | Area    | Area%  | Height  | Height% | A/H  | Name          |
|-------|--------|---------|--------|---------|---------|------|---------------|
| 1     | 7.326  | 4904418 | 50.79  | 2883320 | 35.93   | 5.17 | Cyclohexanol  |
| 2     | 7.373  | 7085261 | 24.14  | 2561137 | 31.92   | 2.77 | Cyclohexanone |
| 3     | 8.834  | 7355587 | 25.07  | 2579457 | 32.15   | 2.85 | Decane        |
|       |        | 9345266 | 100.00 | 8023914 | 100.00  |      |               |

Line#:1 R.Time:7.325(Scan#:666)  
 MassPeaks:257  
 RawMode:Averaged 7.320-7.330(665-667) BasePeak:57(350605)  
 BG Mode:Calc. from Peak Group 1 - Event 1 Scan

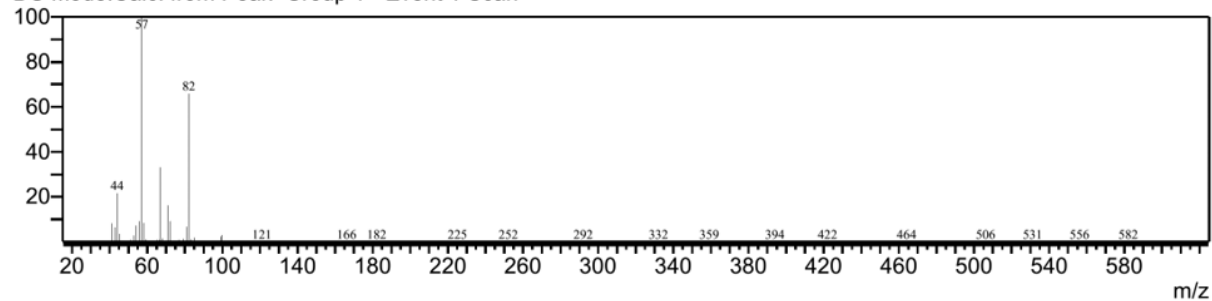

Line#:2 R.Time:7.370(Scan#:675)  
 MassPeaks:274  
 RawMode:Averaged 7.365-7.375(674-676) BasePeak:55(213232)  
 BG Mode:Calc. from Peak Group 1 - Event 1 Scan

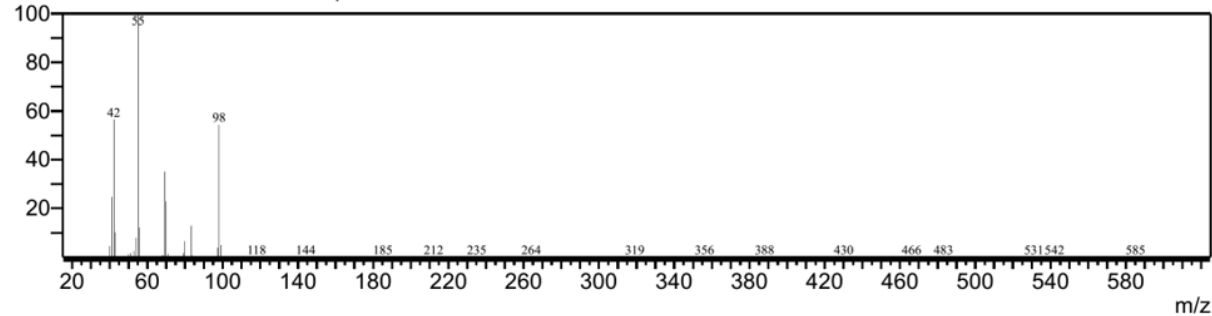

Entry 8

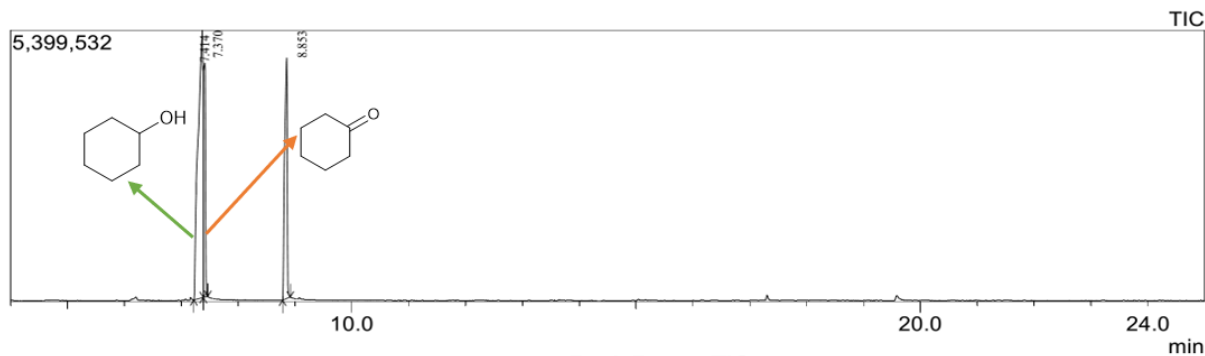

Peak Report TIC

| Peak# | R.Time | Area    | Area%  | Height   | Height% | A/H  | Name          |
|-------|--------|---------|--------|----------|---------|------|---------------|
| 1     | 7.370  | 3557488 | 57.80  | 5323602  | 36.05   | 6.30 | Cyclohexanol  |
| 2     | 7.414  | 0007548 | 17.24  | 4658970  | 31.55   | 2.15 | Cyclohexanone |
| 3     | 8.853  | 4496621 | 24.97  | 4786214  | 32.41   | 3.03 | Decane        |
|       |        | 8061657 | 100.00 | 14768786 | 100.00  |      |               |

Line#:1 R.Time:7.370(Scan#:675)

MassPeaks:265

RawMode:Averaged 7.365-7.375(674-676) BasePeak:57(733423)

BG Mode:Calc. from Peak Group 1 - Event 1 Scan

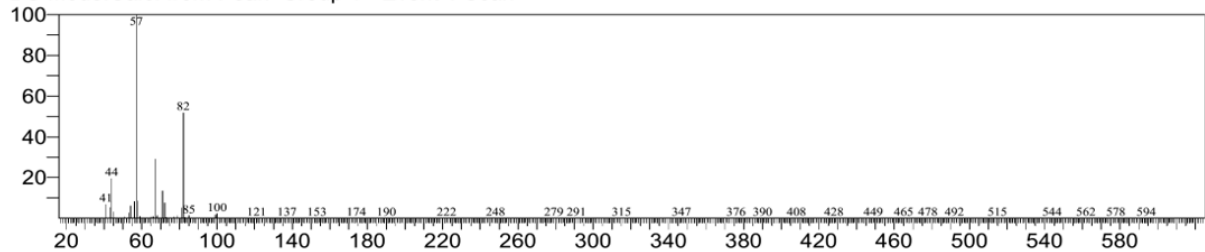

Line#:2 R.Time:7.415(Scan#:684)

MassPeaks:305

RawMode:Averaged 7.410-7.420(683-685) BasePeak:55(456381)

BG Mode:Calc. from Peak Group 1 - Event 1 Scan

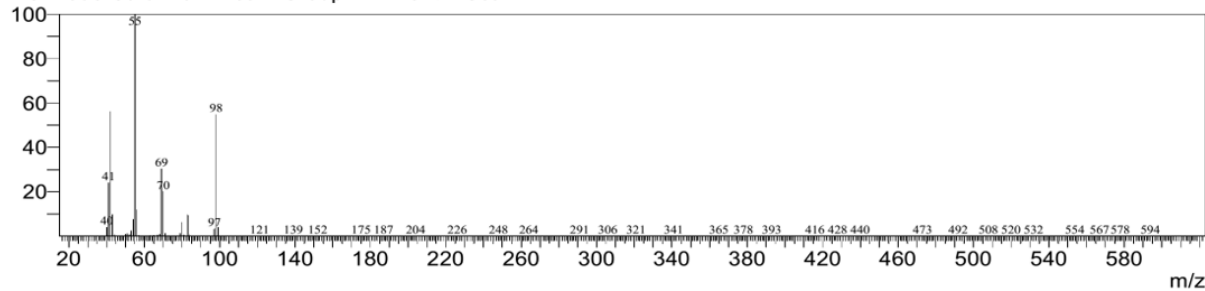

Entry 9

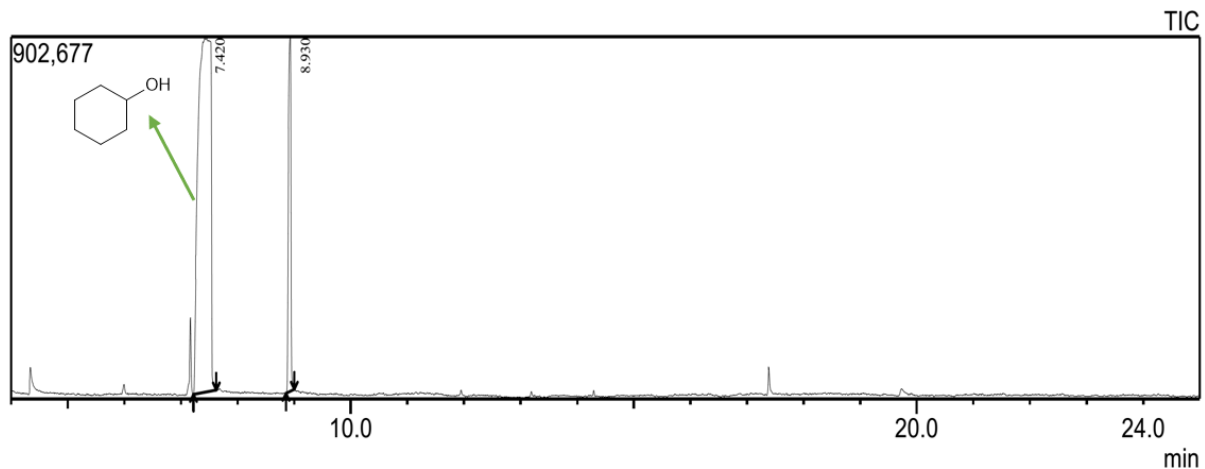

Peak Report TIC

| Peak# | R.Time | Area    | Area%  | Height  | Height% | A/H   | Name         |
|-------|--------|---------|--------|---------|---------|-------|--------------|
| 1     | 7.420  | 3675192 | 82.96  | 884264  | 50.04   | 15.47 | Cyclohexanol |
| 2     | 8.930  | 2807947 | 17.04  | 882892  | 49.96   | 3.18  | Decane       |
|       |        | 6483139 | 100.00 | 1767156 | 100.00  |       |              |

Line#:1 R.Time:7.420(Scan#:685)

MassPeaks:311

RawMode:Averaged 7.415-7.425(684-686) BasePeak:57(202156)

BG Mode:Calc. from Peak Group 1 - Event 1 Scan

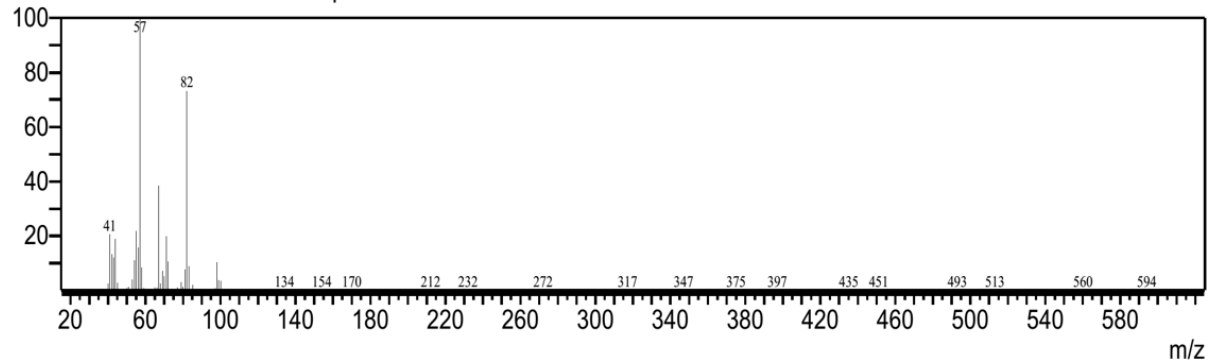

Entry 10

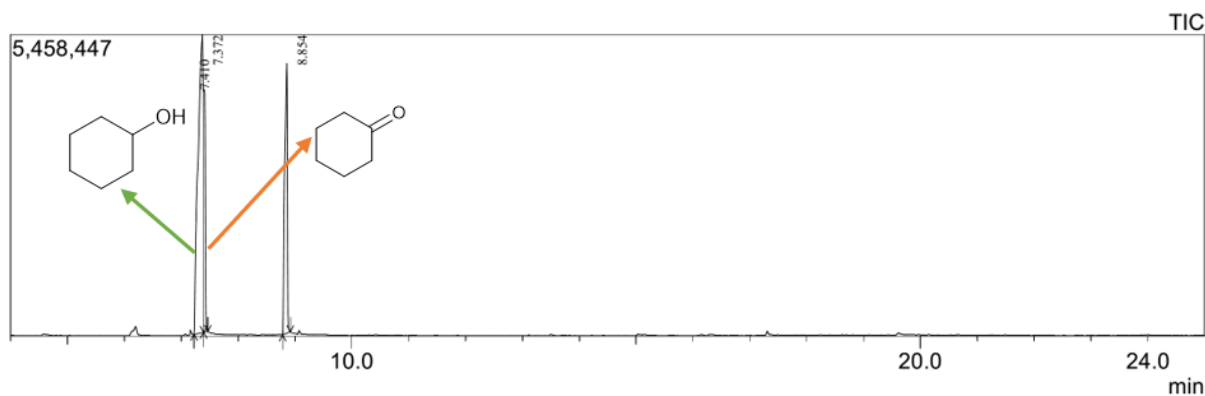

Peak Report TIC

| Peak# | R. Time | Area    | Area%  | Height   | Height% | A/H  | Name          |
|-------|---------|---------|--------|----------|---------|------|---------------|
| 1     | 7.372   | 5375207 | 61.43  | 5390310  | 36.81   | 6.56 | Cyclohexanol  |
| 2     | 7.410   | 7348629 | 12.76  | 4369078  | 29.83   | 1.68 | Cyclohexanone |
| 3     | 8.854   | 4865728 | 25.81  | 4885581  | 33.36   | 3.04 | Decane        |
|       |         | 7589564 | 100.00 | 14644969 | 100.00  |      |               |

Line#:1 R.Time:7.370(Scan#:675)

MassPeaks:286

RawMode:Averaged 7.365-7.375(674-676) BasePeak:57(865936)

BG Mode:Calc. from Peak Group 1 - Event 1 Scan

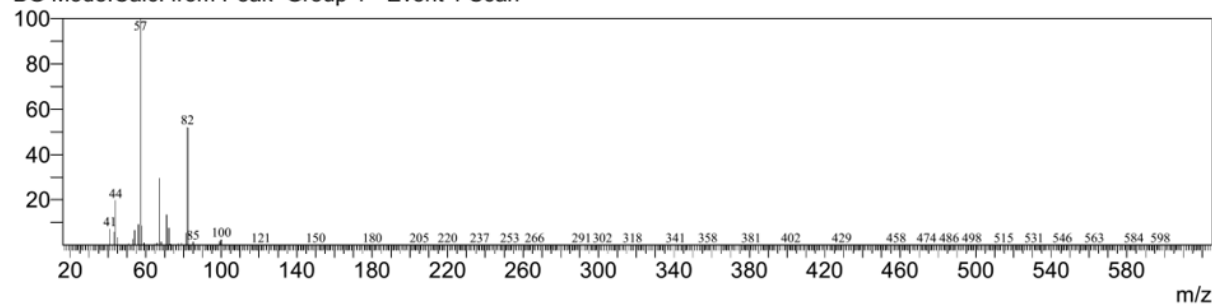

Line#:2 R.Time:7.410(Scan#:683)

MassPeaks:282

RawMode:Averaged 7.405-7.415(682-684) BasePeak:55(266825)

BG Mode:Calc. from Peak Group 1 - Event 1 Scan

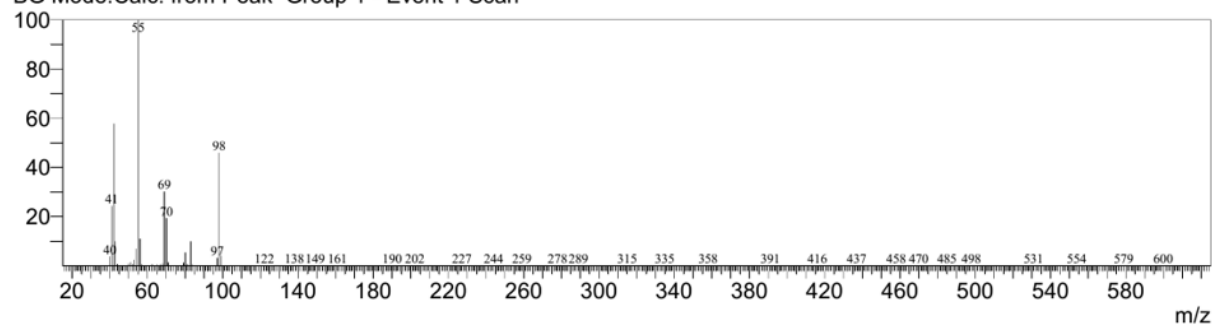

Entry 11

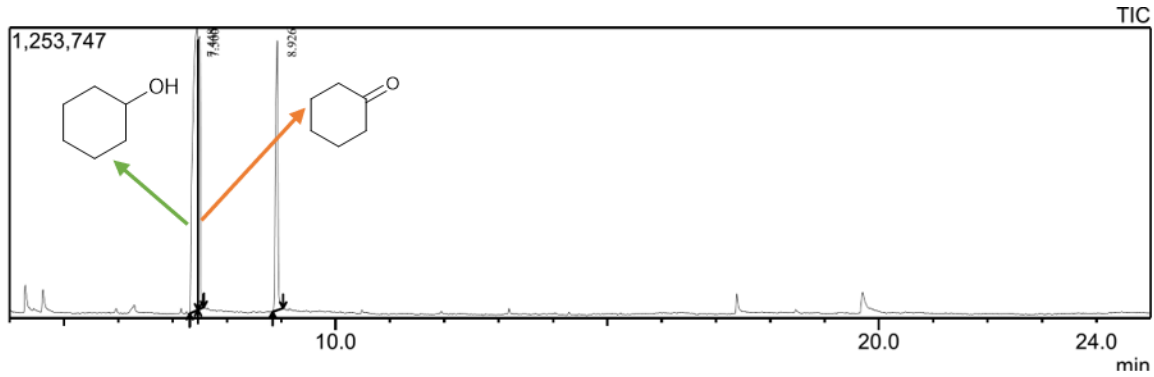

Peak Report TIC

| Peak# | R.Time | Area    | Area%  | Height  | Height% | A/H  | Name          |
|-------|--------|---------|--------|---------|---------|------|---------------|
| 1     | 7.448  | 7882749 | 53.16  | 1218692 | 34.26   | 6.47 | Cyclohexanol  |
| 2     | 7.500  | 3267537 | 22.04  | 1175706 | 33.05   | 2.78 | Cyclohexanone |
| 3     | 8.926  | 3676768 | 24.80  | 1162884 | 32.69   | 3.16 | Decane        |
|       |        | 4827054 | 100.00 | 3557282 | 100.00  |      |               |

Line#:1 R.Time:7.445(Scan#:690)  
 MassPeaks:289  
 RawMode:Averaged 7.440-7.450(689-691) BasePeak:57(146557)  
 BG Mode:Calc. from Peak Group 1 - Event 1 Scan

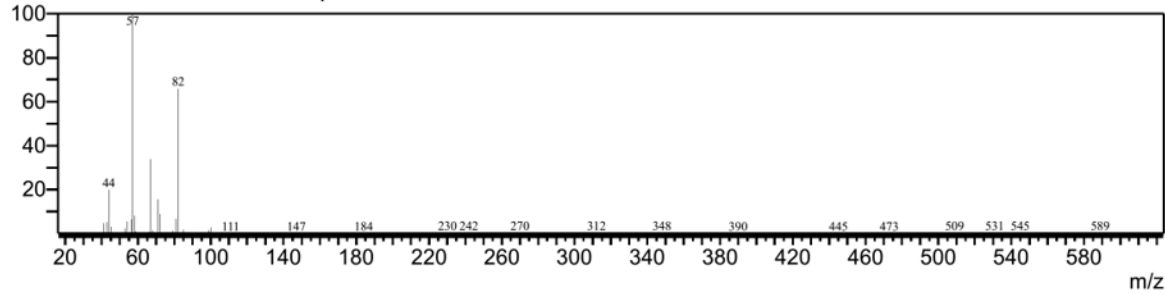

Line#:2 R.Time:7.500(Scan#:701)  
 MassPeaks:289  
 RawMode:Averaged 7.495-7.505(700-702) BasePeak:55(104862)  
 BG Mode:Calc. from Peak Group 1 - Event 1 Scan

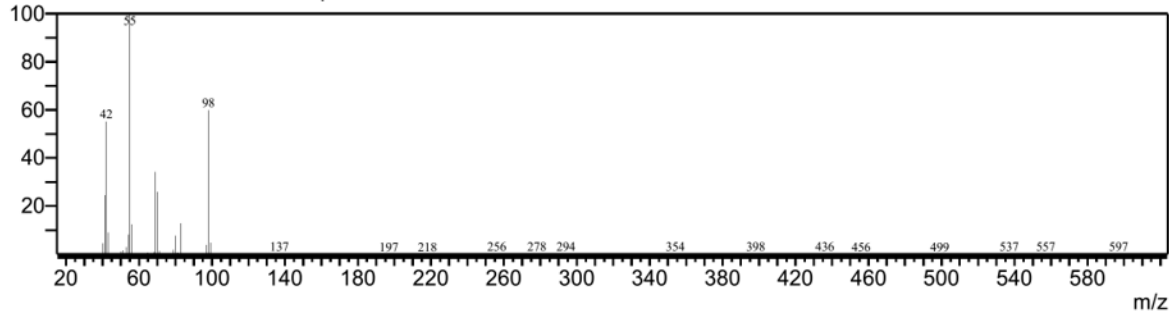

Entry 12

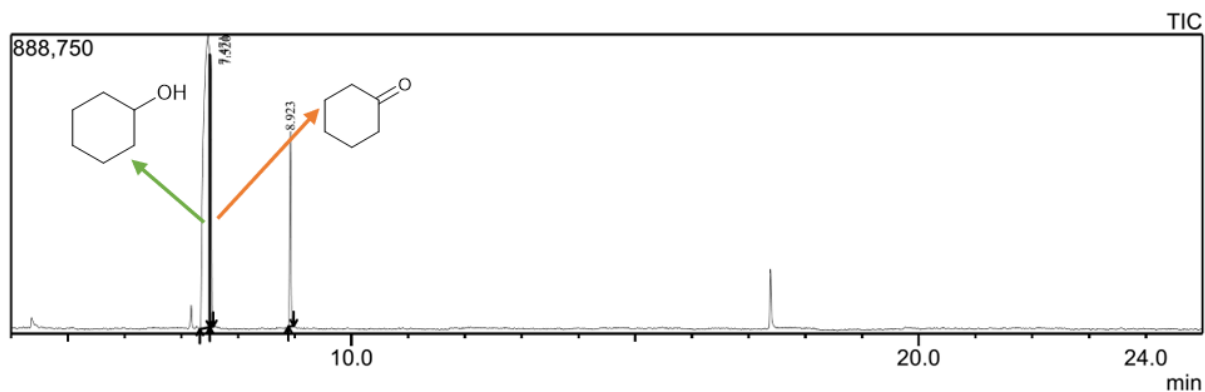

Peak Report TIC

| Peak# | R.Time | Area    | Area%  | Height  | Height% | A/H  | Name          |
|-------|--------|---------|--------|---------|---------|------|---------------|
| 1     | 7.471  | 6603588 | 73.81  | 869848  | 38.53   | 7.59 | Cyclohexanol  |
| 2     | 7.520  | 1450298 | 16.21  | 809008  | 35.83   | 1.79 | Cyclohexanone |
| 3     | 8.923  | 892504  | 9.98   | 578849  | 25.64   | 1.54 | Decane        |
|       |        | 8946390 | 100.00 | 2257705 | 100.00  |      |               |

Line#:1 R.Time:7.470(Scan#:695)  
 MassPeaks:302  
 RawMode:Averaged 7.465-7.475(694-696) BasePeak:57(119335)  
 BG Mode:Calc. from Peak Group 1 - Event 1 Scan

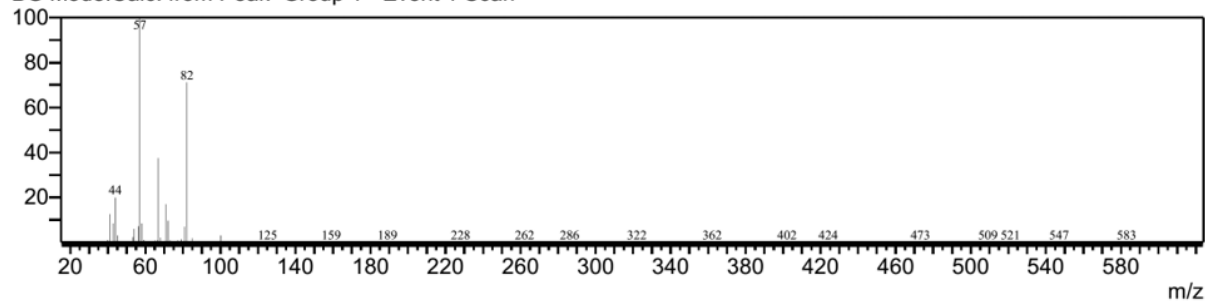

Line#:2 R.Time:7.520(Scan#:705)  
 MassPeaks:307  
 RawMode:Averaged 7.515-7.525(704-706) BasePeak:55(53656)  
 BG Mode:Calc. from Peak Group 1 - Event 1 Scan

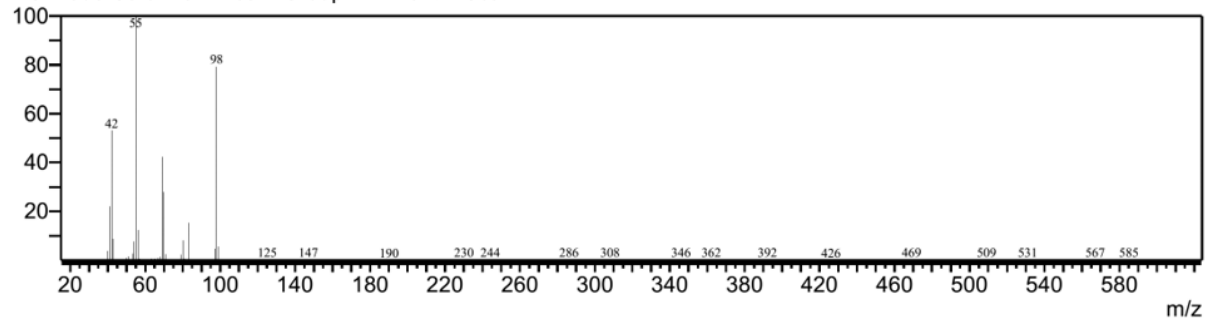

Entry 13

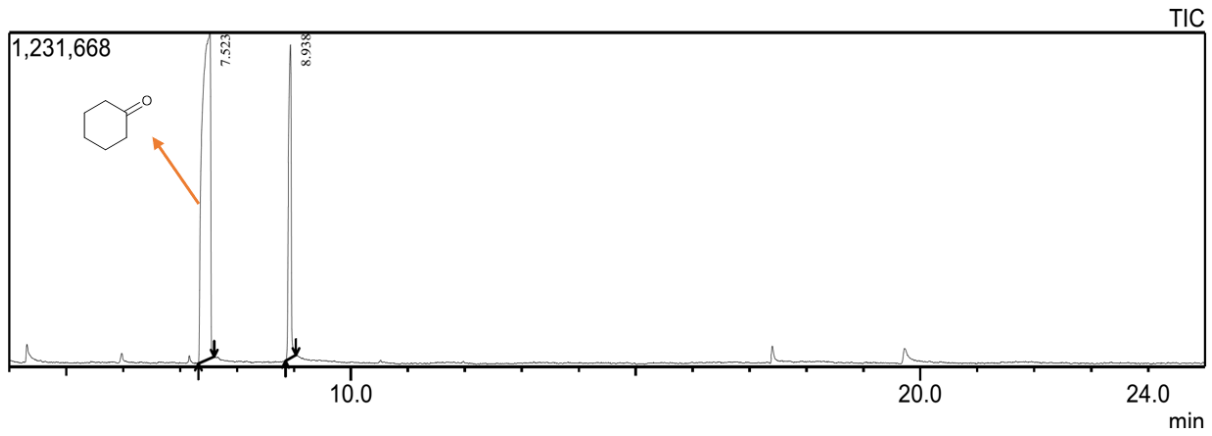

Peak Report TIC

| Peak# | R.Time | Area    | Area%  | Height  | Height% | A/H   | Name          |
|-------|--------|---------|--------|---------|---------|-------|---------------|
| 1     | 7.523  | 2271639 | 76.30  | 1199608 | 50.92   | 10.23 | Cyclohexanone |
| 2     | 8.938  | 3812559 | 23.70  | 1156046 | 49.08   | 3.30  | Decane        |
|       |        | 6084198 | 100.00 | 2355654 | 100.00  |       |               |

Line#:1 R.Time:7.525(Scan#:706)

MassPeaks:265

RawMode:Averaged 7.520-7.530(705-707) BasePeak:55(307979)

BG Mode:Calc. from Peak Group 1 - Event 1 Scan

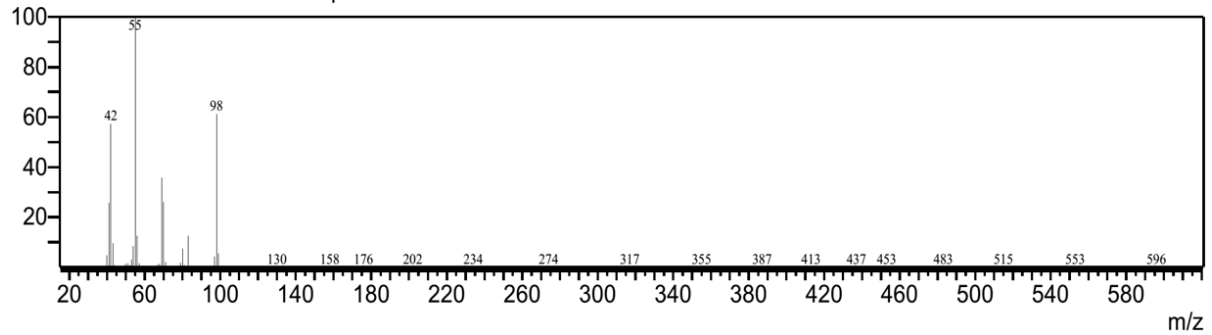



## GCMS of Base optimization for the Transfer Hydrogenation of cyclohexanone (Table 2)

### Entry 1

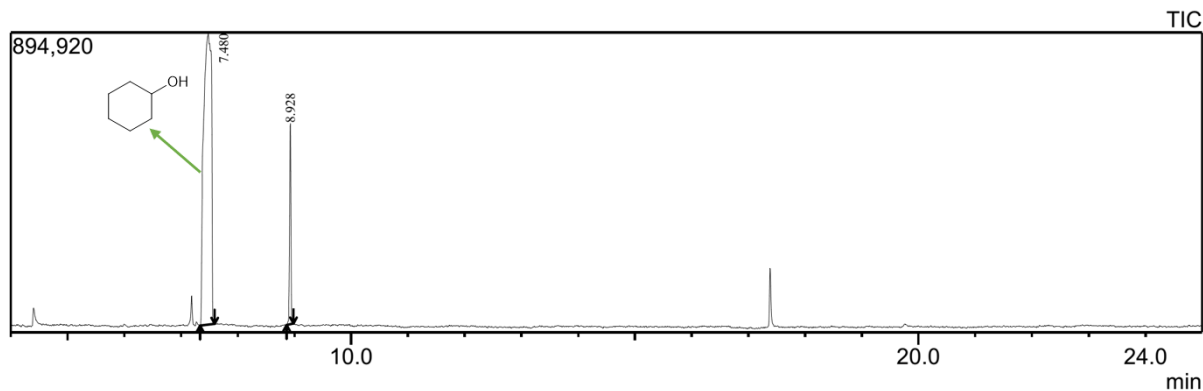

Peak Report TIC

| Peak# | R.Time | Area    | Area%  | Height  | Height% | A/H  | Name         |
|-------|--------|---------|--------|---------|---------|------|--------------|
| 1     | 7.480  | 8297012 | 89.54  | 871051  | 59.27   | 9.53 | Cyclohexanol |
| 2     | 8.928  | 969652  | 10.46  | 598501  | 40.73   | 1.62 | Decane       |
|       |        | 9266664 | 100.00 | 1469552 | 100.00  |      |              |

Line#:1 R.Time:7.480(Scan#:697)

MassPeaks:339

RawMode:Averaged 7.475-7.485(696-698) BasePeak:57(125814)

BG Mode:Calc. from Peak Group 1 - Event 1 Scan

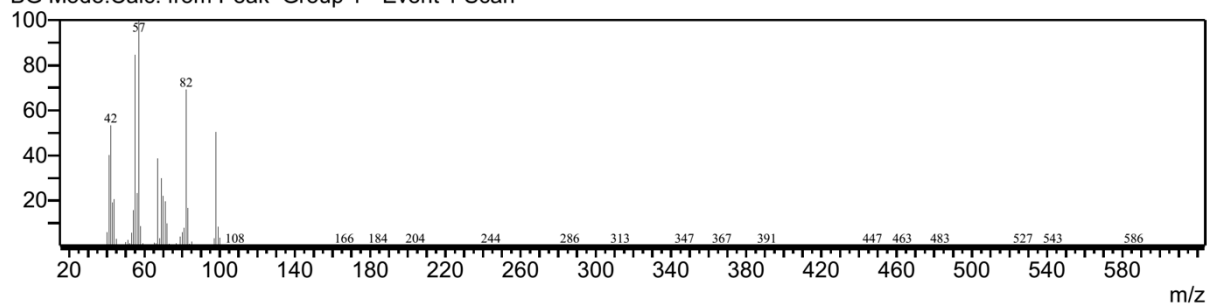

**Entry 2**

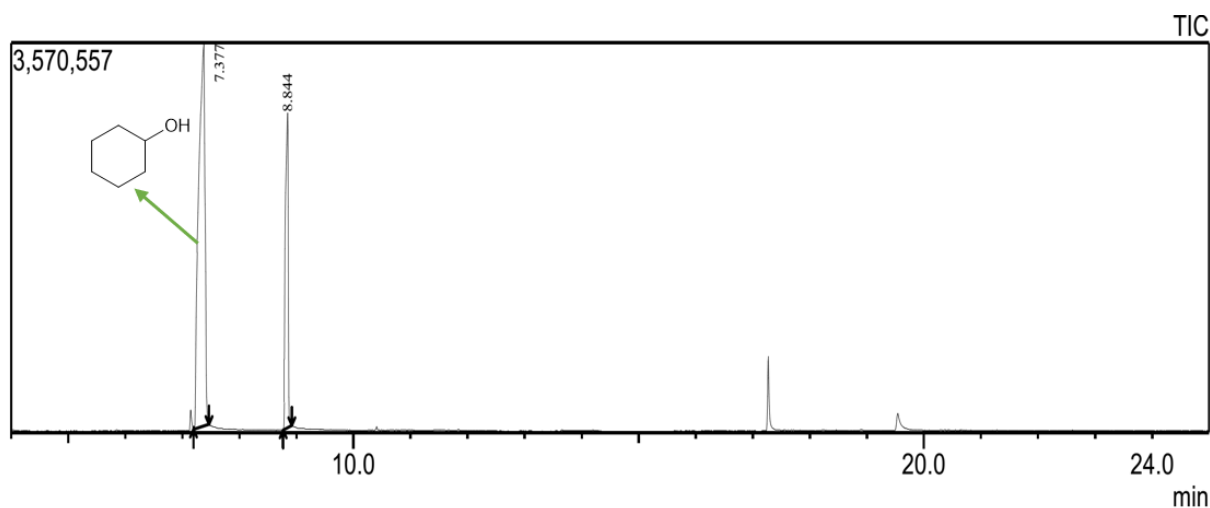

Peak Report TIC

| Peak# | R.Time | Area     | Area%  | Height  | Height% | A/H  | Name         |
|-------|--------|----------|--------|---------|---------|------|--------------|
| 1     | 7.377  | 27160971 | 73.62  | 3505164 | 54.90   | 7.75 | Cyclohexanol |
| 2     | 8.844  | 9730795  | 26.38  | 2879758 | 45.10   | 3.38 | Decane       |
|       |        | 36891766 | 100.00 | 6384922 | 100.00  |      |              |

Line#:1 R.Time:7.375(Scan#:676)

MassPeaks:269

RawMode:Averaged 7.370-7.380(675-677) BasePeak:57(692530)

BG Mode:Calc. from Peak Group 1 - Event 1 Scan

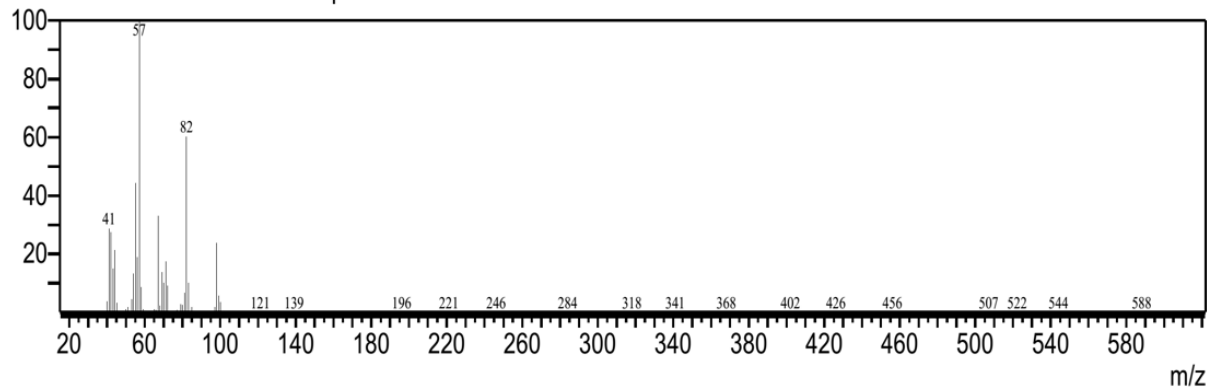

**Entry 3**

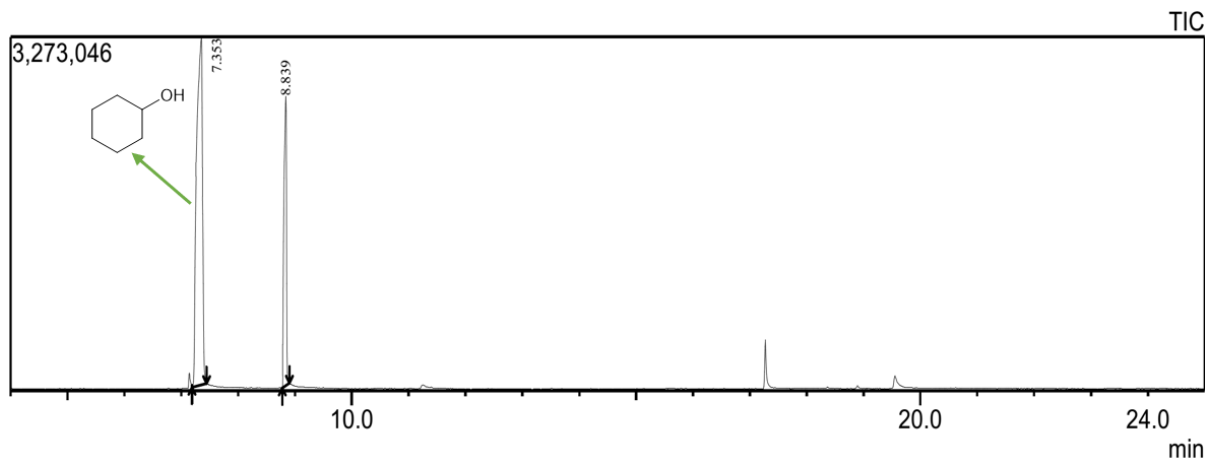

Peak Report TIC

| Peak# | R.Time | Area    | Area%  | Height  | Height% | A/H  | Name         |
|-------|--------|---------|--------|---------|---------|------|--------------|
| 1     | 7.353  | 2979637 | 74.06  | 3215528 | 54.60   | 7.15 | Cyclohexanol |
| 2     | 8.839  | 8047814 | 25.94  | 2674194 | 45.40   | 3.01 | Decane       |
|       |        | 1027451 | 100.00 | 5889722 | 100.00  |      |              |

Line#:1 R.Time:7.355(Scan#:672)

MassPeaks:308

RawMode:Averaged 7.350-7.360(671-673) BasePeak:57(636311)

BG Mode:Calc. from Peak Group 1 - Event 1 Scan

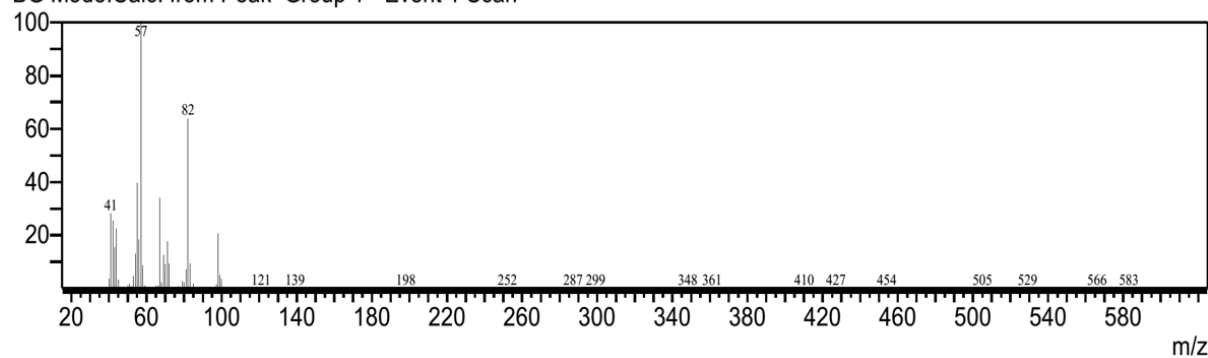

Entry 4

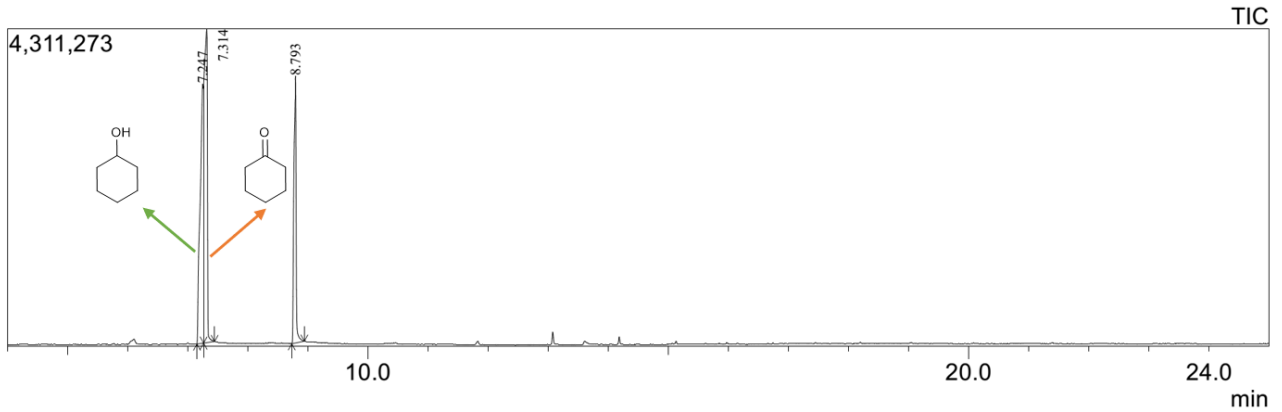

Peak Report TIC

| Peak# | R.Time | Area    | Area%  | Height   | Height% | A/H  | Name          |
|-------|--------|---------|--------|----------|---------|------|---------------|
| 1     | 7.247  | 3275239 | 34.12  | 3523144  | 30.88   | 3.77 | Cyclohexanol  |
| 2     | 7.314  | 5797500 | 40.60  | 4259877  | 37.34   | 3.71 | Cyclohexanone |
| 3     | 8.793  | 9835061 | 25.28  | 3625197  | 31.78   | 2.71 | Decane        |
|       |        | 8907800 | 100.00 | 11408218 | 100.00  |      |               |

Line#:1 R.Time:7.245(Scan#:650)

MassPeaks:303

RawMode:Averaged 7.240-7.250(649-651) BasePeak:57(186067)

BG Mode:Calc. from Peak Group 1 - Event 1 Scan

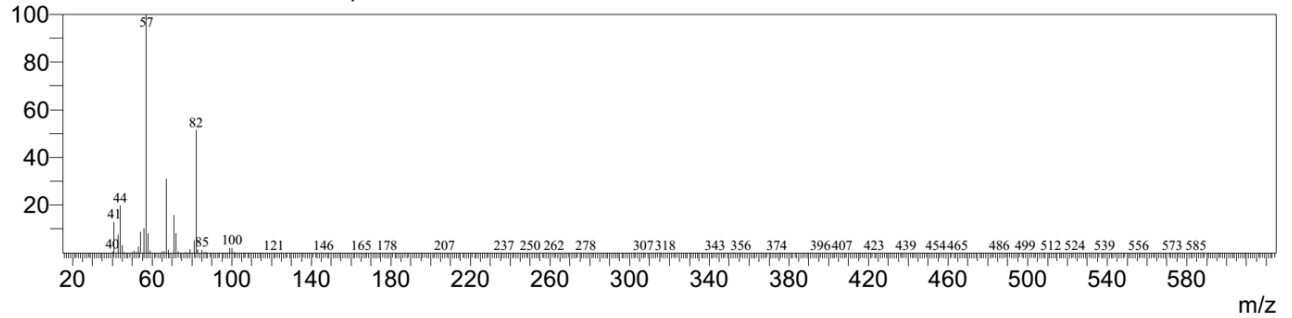

Entry 5

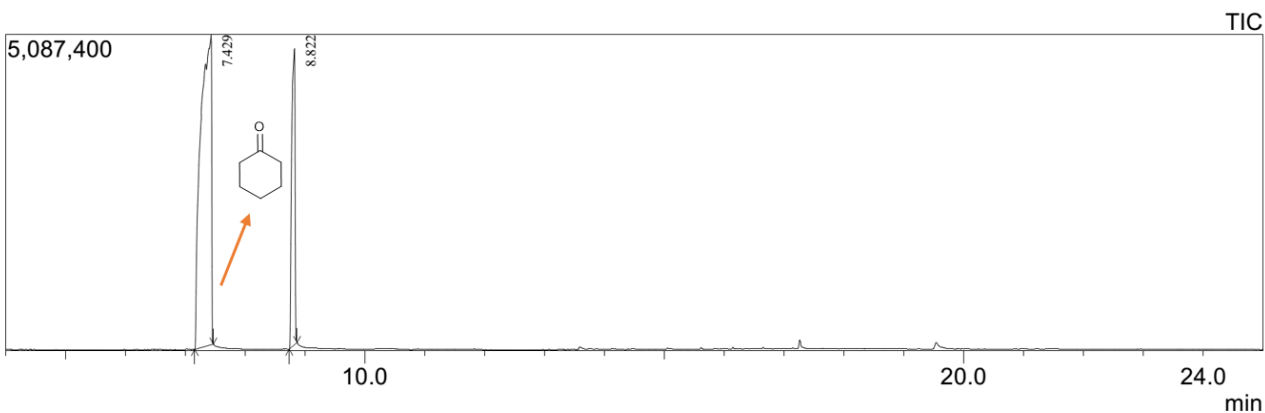

Peak Report TIC

| Peak# | R.Time | Area     | Area%  | Height  | Height% | A/H   | Name          |
|-------|--------|----------|--------|---------|---------|-------|---------------|
| 1     | 7.429  | 2185999  | 76.64  | 4987768 | 51.14   | 12.47 | Cyclohexanone |
| 2     | 8.822  | 8949212  | 23.36  | 4765961 | 48.86   | 3.98  | Decane        |
|       |        | 31135211 | 100.00 | 9753729 | 100.00  |       |               |

Line#:1 R.Time:7.430(Scan#:687)

MassPeaks:340

RawMode:Averaged 7.425-7.435(686-688) BasePeak:55(1299627)

BG Mode:Calc. from Peak Group 1 - Event 1 Scan

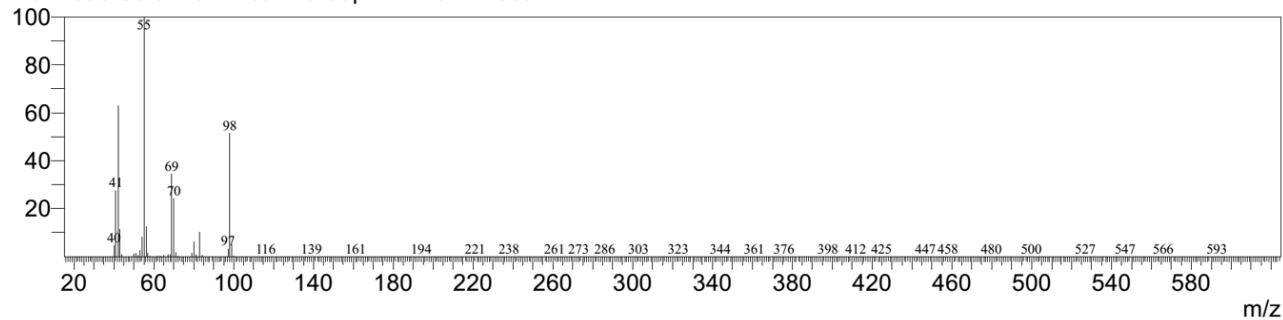

Entry 6

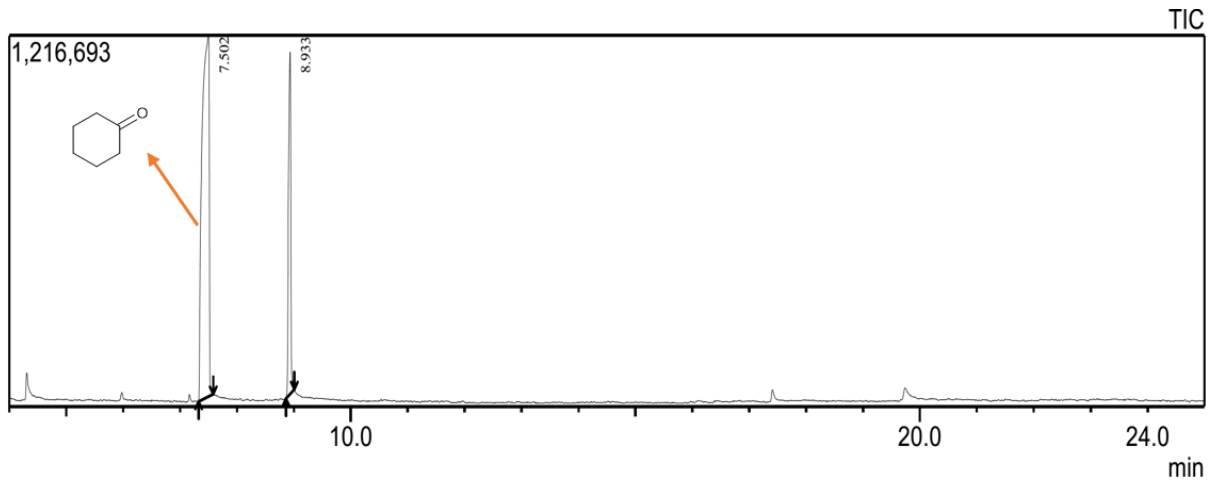

Peak Report TIC

| Peak# | R.Time | Area    | Area%  | Height  | Height% | A/H  | Name          |
|-------|--------|---------|--------|---------|---------|------|---------------|
| 1     | 7.502  | 0383725 | 76.79  | 1181925 | 51.33   | 8.79 | Cyclohexanone |
| 2     | 8.933  | 3138476 | 23.21  | 1120800 | 48.67   | 2.80 | Decane        |
|       |        | 3522201 | 100.00 | 2302725 | 100.00  |      |               |

Line#:1 R.Time:7.500(Scan#:701)

MassPeaks:313

RawMode:Averaged 7.495-7.505(700-702) BasePeak:55(306355)

BG Mode:Calc. from Peak Group 1 - Event 1 Scan

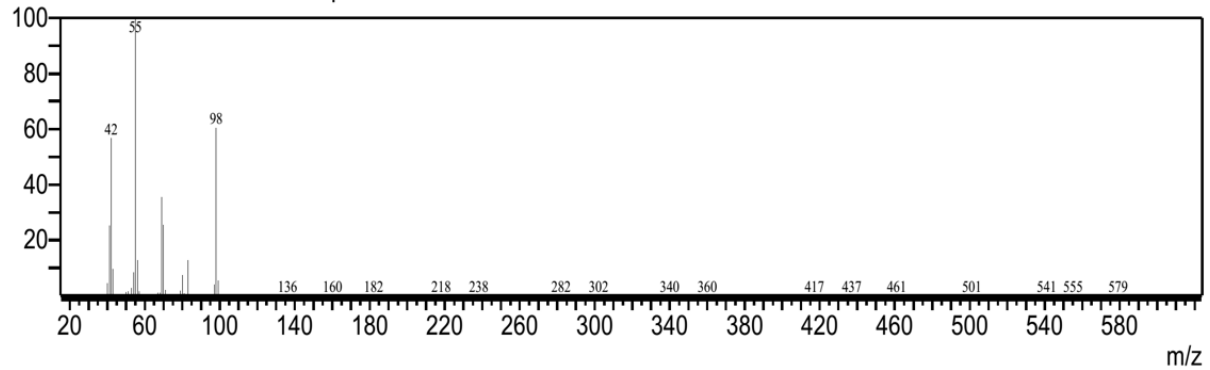

Entry 7

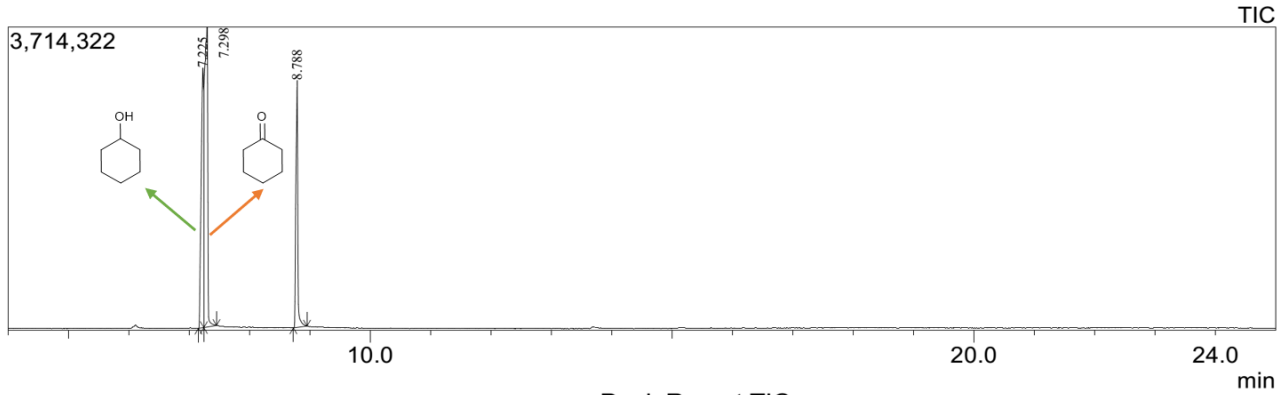

Peak Report TIC

| Peak# | R.Time | Area     | Area%  | Height  | Height% | A/H  | Name          |
|-------|--------|----------|--------|---------|---------|------|---------------|
| 1     | 7.225  | 9080785  | 29.99  | 3184531 | 32.23   | 2.85 | Cyclohexanol  |
| 2     | 7.298  | 3947798  | 46.07  | 3671895 | 37.16   | 3.80 | Cyclohexanone |
| 3     | 8.788  | 7249812  | 23.94  | 3024663 | 30.61   | 2.40 | Decane        |
|       |        | 10278395 | 100.00 | 9881089 | 100.00  |      |               |

Line#:1 R.Time:7.225(Scan#:646)

MassPeaks:308

RawMode:Averaged 7.220-7.230(645-647) BasePeak:57(284578)

BG Mode:Calc. from Peak Group 1 - Event 1 Scan

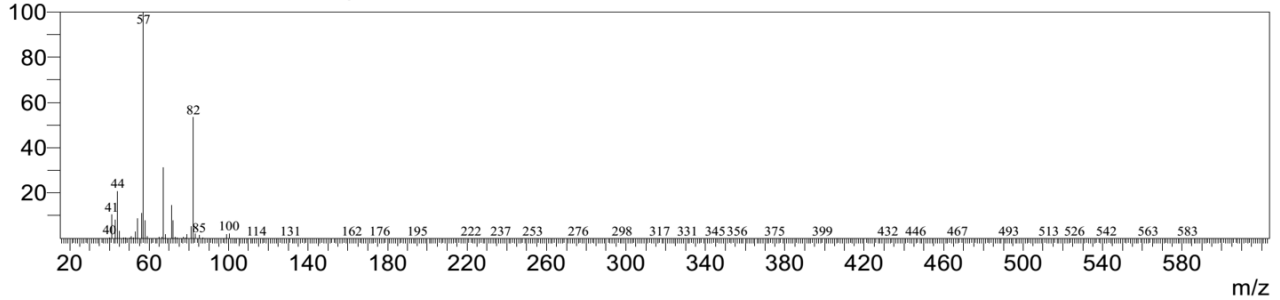

Entry 8

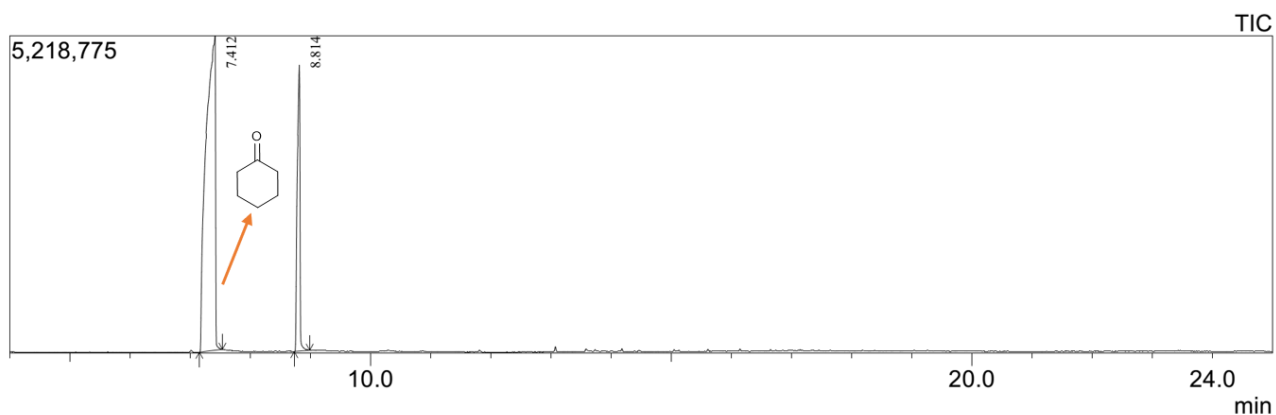

Peak Report TIC

| Peak# | R.Time | Area     | Area%  | Height  | Height% | A/H   | Name          |
|-------|--------|----------|--------|---------|---------|-------|---------------|
| 1     | 7.412  | 56135544 | 78.87  | 5170914 | 52.34   | 10.86 | Cyclohexanone |
| 2     | 8.814  | 5036215  | 21.13  | 4708701 | 47.66   | 3.19  | Decane        |
|       |        | 71171759 | 100.00 | 9879615 | 100.00  |       |               |

Line#:1 R.Time:7.410(Scan#:683)

MassPeaks:326

RawMode:Averaged 7.405-7.415(682-684) BasePeak:55(1329410)

BG Mode:Calc. from Peak Group 1 - Event 1 Scan

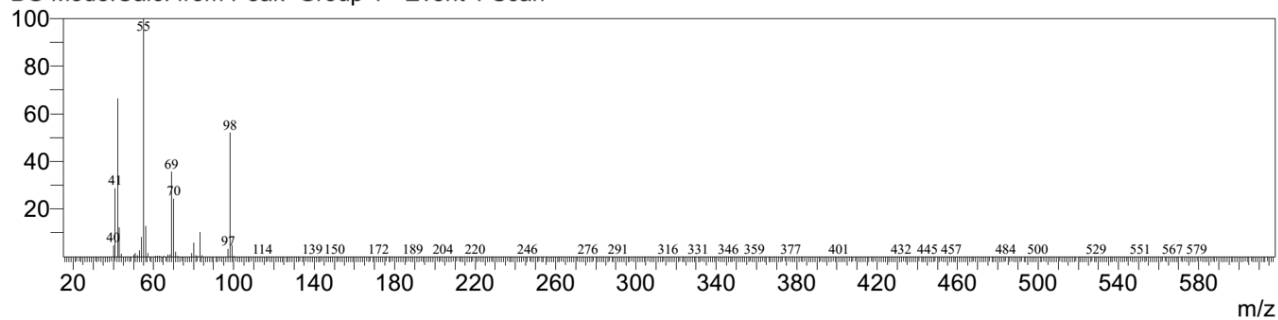



Entry 9

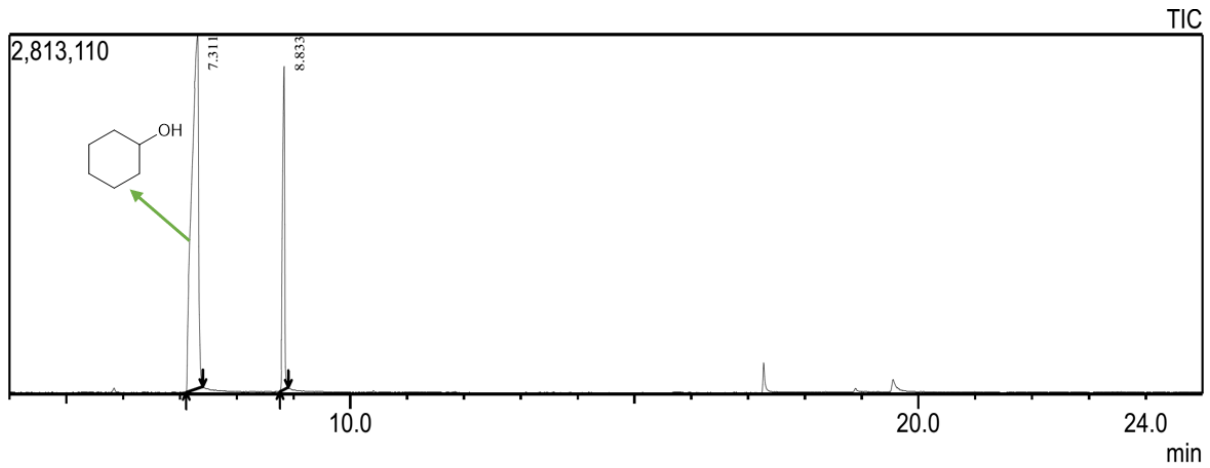

Peak Report TIC

| Peak# | R.Time | Area    | Area%  | Height  | Height% | A/H  | Name         |
|-------|--------|---------|--------|---------|---------|------|--------------|
| 1     | 7.311  | 3044057 | 77.80  | 2767081 | 52.25   | 8.33 | Cyclohexanol |
| 2     | 8.833  | 6573768 | 22.20  | 2529125 | 47.75   | 2.60 | Decane       |
|       |        | 9617825 | 100.00 | 5296206 | 100.00  |      |              |

Line#:1 R.Time:7.310(Scan#:663)

MassPeaks:328

RawMode:Averaged 7.305-7.315(662-664) BasePeak:57(651933)

BG Mode:Calc. from Peak Group 1 - Event 1 Scan

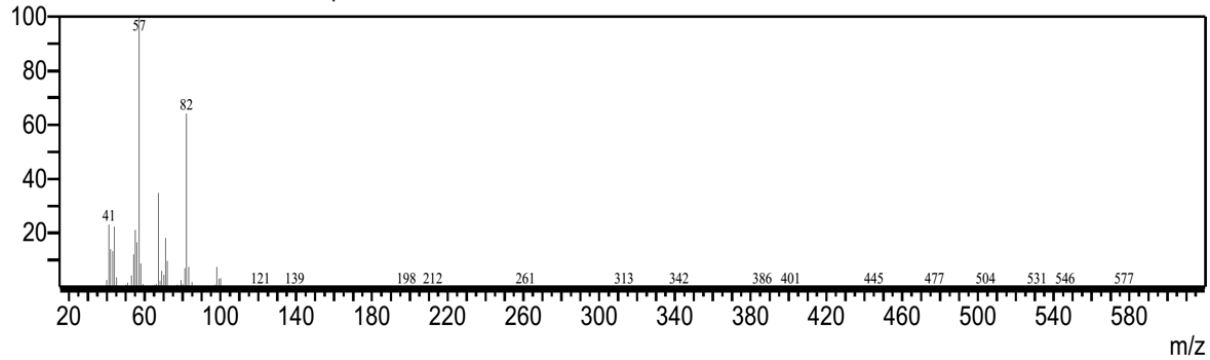

Entry 10

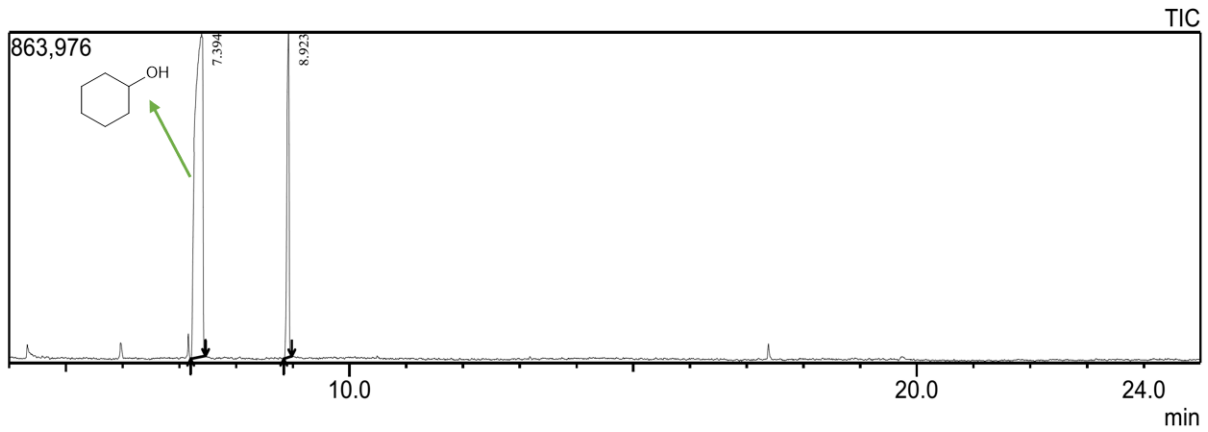

Peak Report TIC

| Peak# | R.Time | Area    | Area%  | Height  | Height% | A/H  | Name         |
|-------|--------|---------|--------|---------|---------|------|--------------|
| 1     | 7.394  | 8053202 | 77.36  | 843490  | 49.85   | 9.55 | Cyclohexanol |
| 2     | 8.923  | 2356662 | 22.64  | 848631  | 50.15   | 2.78 | Decane       |
|       |        | 0409864 | 100.00 | 1692121 | 100.00  |      |              |

Line#:1 R.Time:7.395(Scan#:680)

MassPeaks:322

RawMode:Averaged 7.390-7.400(679-681) BasePeak:57(218836)

BG Mode:Calc. from Peak Group 1 - Event 1 Scan

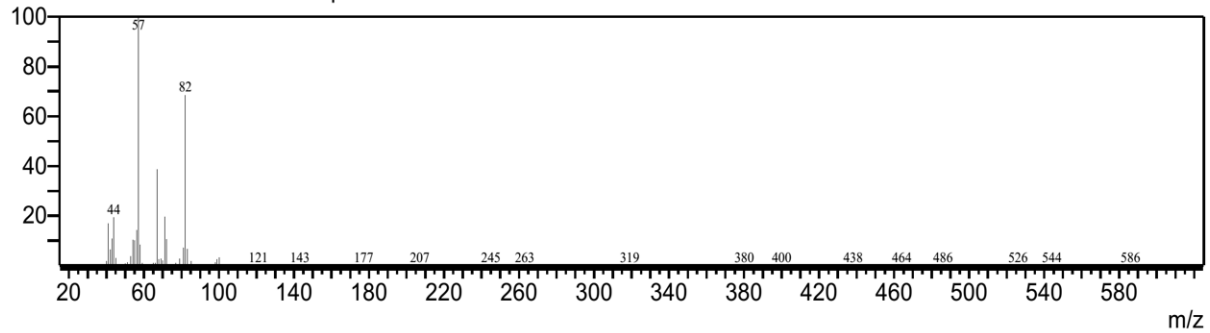

Entry 11

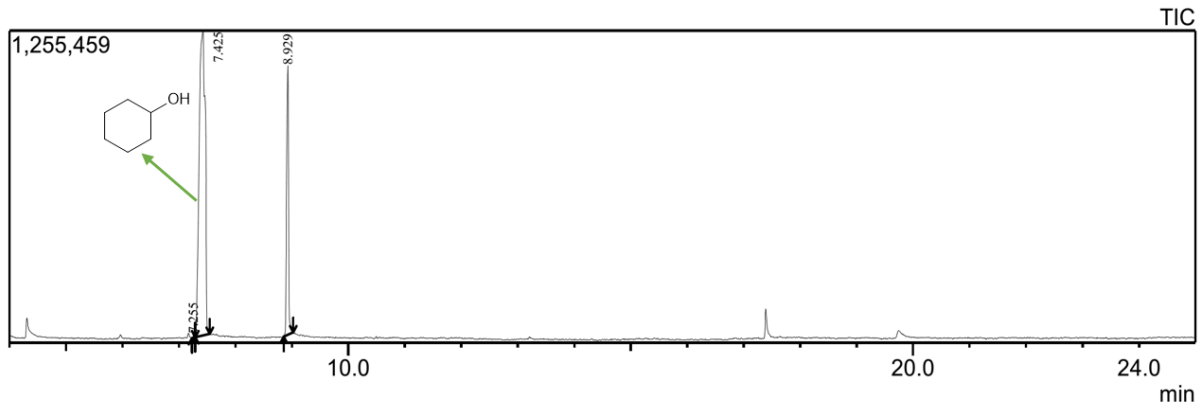

Peak Report TIC

| Peak# | R.Time | Area     | Area%  | Height  | Height% | A/H  | Name         |
|-------|--------|----------|--------|---------|---------|------|--------------|
| 1     | 7.255  | 35735    | 0.30   | 15223   | 0.66    | 2.35 | Cyclohexanol |
| 2     | 7.425  | 9189175  | 77.32  | 1225224 | 52.74   | 7.50 | Cyclohexanol |
| 3     | 8.929  | 2659211  | 22.38  | 1082482 | 46.60   | 2.46 | Decane       |
|       |        | 11884121 | 100.00 | 2322929 | 100.00  |      |              |

Line#:2 R.Time:7.425(Scan#:686)

MassPeaks:292

RawMode:Averaged 7.420-7.430(685-687) BasePeak:57(231127)

BG Mode:Calc. from Peak Group 1 - Event 1 Scan

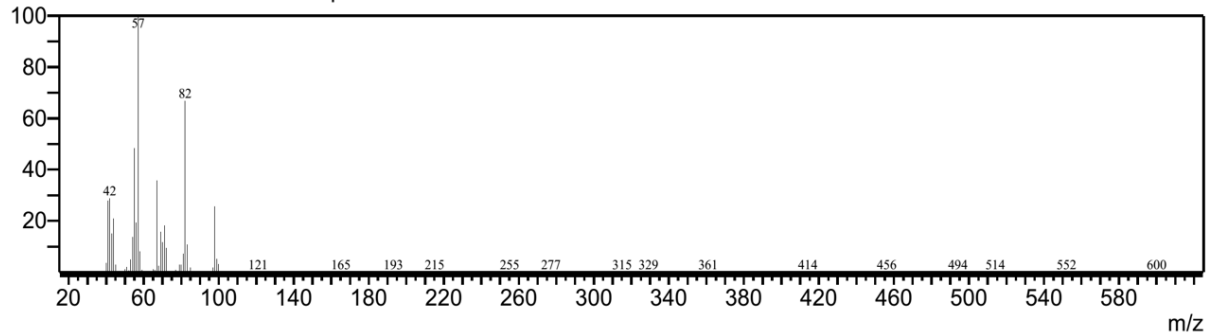

Entry 12

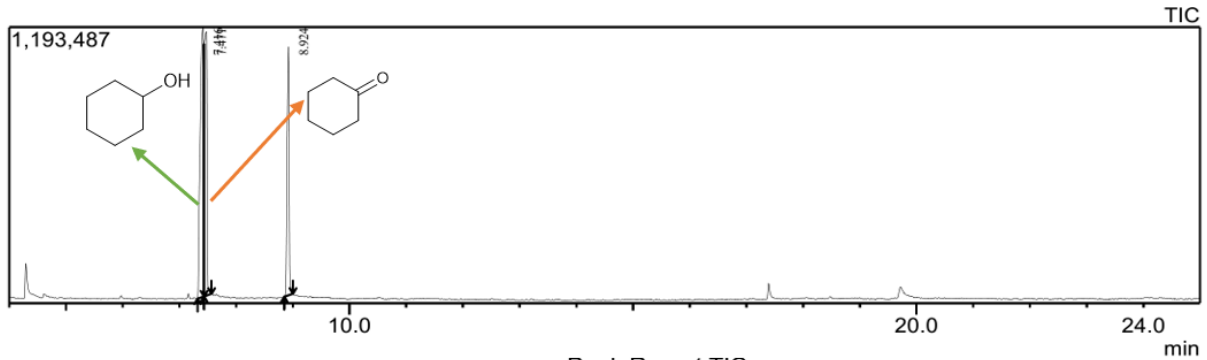

Peak Report TIC

| Peak# | R.Time | Area     | Area%  | Height  | Height% | A/H  | Name          |
|-------|--------|----------|--------|---------|---------|------|---------------|
| 1     | 7.416  | 5344151  | 44.62  | 1164728 | 34.48   | 4.59 | Cyclohexanol  |
| 2     | 7.471  | 3911335  | 32.65  | 1140143 | 33.75   | 3.43 | Cyclohexanone |
| 3     | 8.924  | 2722808  | 22.73  | 1073348 | 31.77   | 2.54 | Decane        |
|       |        | 11978294 | 100.00 | 3378219 | 100.00  |      |               |

Line#:1 R.Time:7.415(Scan#:684)  
 MassPeaks:302  
 RawMode:Averaged 7.410-7.420(683-685) BasePeak:57(133829)  
 BG Mode:Calc. from Peak Group 1 - Event 1 Scan

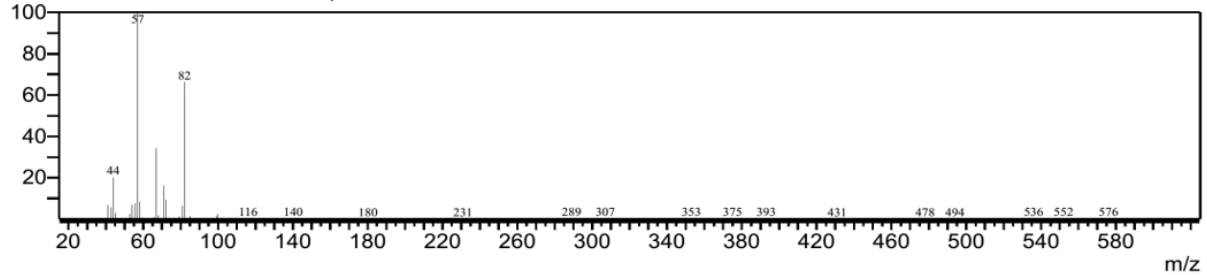

Line#:2 R.Time:7.470(Scan#:695)  
 MassPeaks:279  
 RawMode:Averaged 7.465-7.475(694-696) BasePeak:55(92949)  
 BG Mode:Calc. from Peak Group 1 - Event 1 Scan

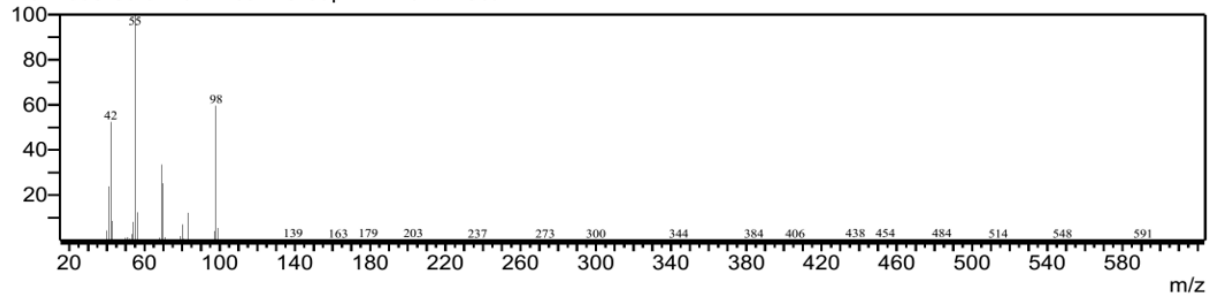

Entry 13

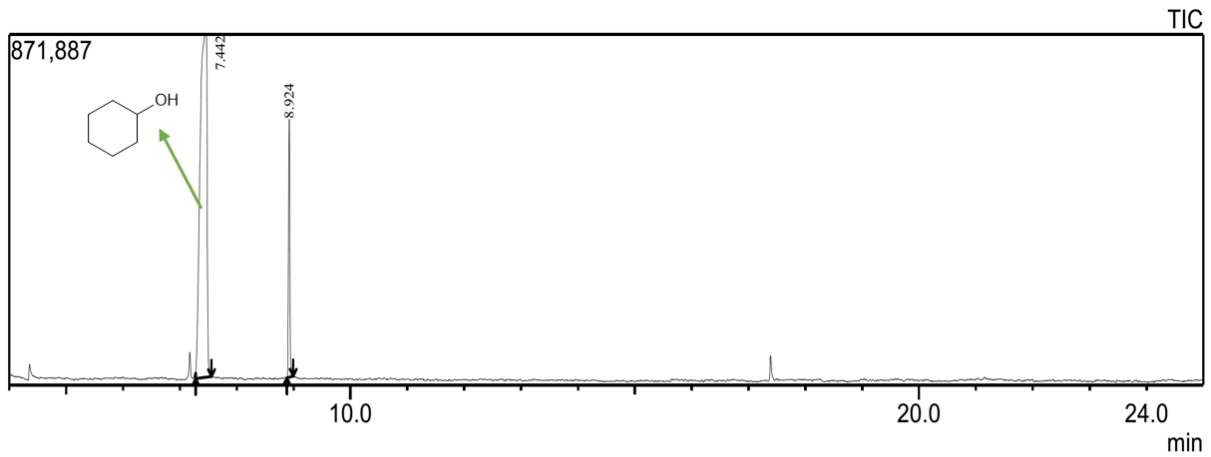

Peak Report TIC

| Peak# | R.Time | Area    | Area%  | Height  | Height% | A/H  | Name         |
|-------|--------|---------|--------|---------|---------|------|--------------|
| 1     | 7.442  | 7299980 | 87.71  | 852053  | 57.04   | 8.57 | Cyclohexanol |
| 2     | 8.924  | 1022719 | 12.29  | 641635  | 42.96   | 1.59 | Decane       |
|       |        | 8322699 | 100.00 | 1493688 | 100.00  |      |              |

Line#:1 R.Time:7.440(Scan#:689)

MassPeaks:308

RawMode:Averaged 7.435-7.445(688-690) BasePeak:57(177692)

BG Mode:Calc. from Peak Group 1 - Event 1 Scan

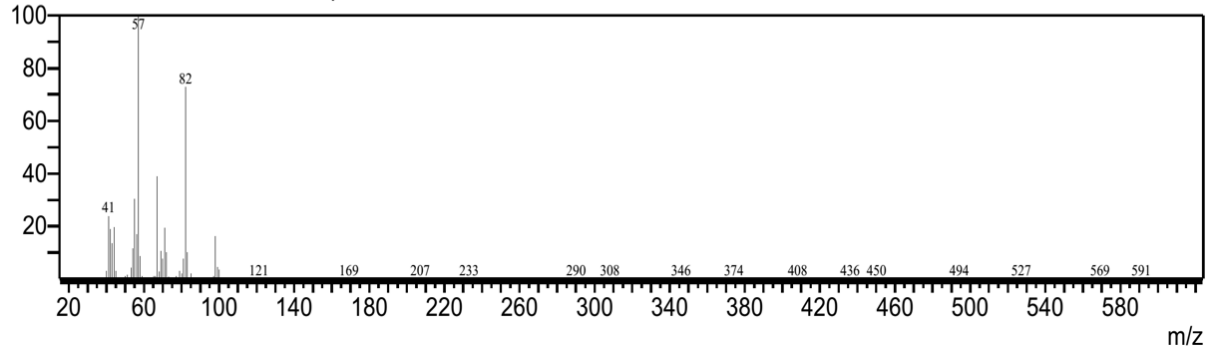

Entry 14

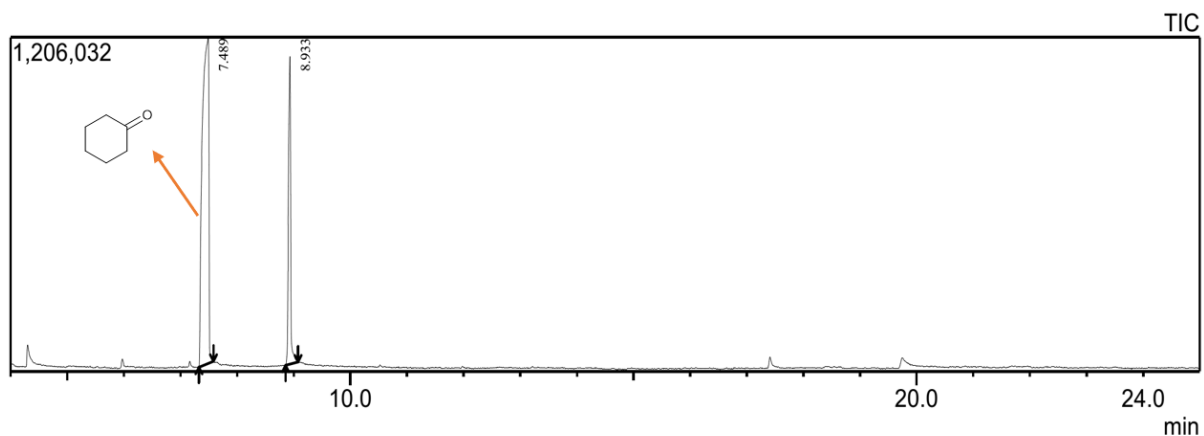

Peak Report TIC

| Peak# | R.Time | Area    | Area%  | Height  | Height% | A/H  | Name          |
|-------|--------|---------|--------|---------|---------|------|---------------|
| 1     | 7.489  | 9579193 | 75.77  | 1175706 | 51.43   | 8.15 | Cyclohexanone |
| 2     | 8.933  | 3063428 | 24.23  | 1110205 | 48.57   | 2.76 | Decane        |
|       |        | 2642621 | 100.00 | 2285911 | 100.00  |      |               |

Line#:1 R.Time:7.490(Scan#:699)

MassPeaks:247

RawMode:Averaged 7.485-7.495(698-700) BasePeak:55(303422)

BG Mode:Calc. from Peak Group 1 - Event 1 Scan

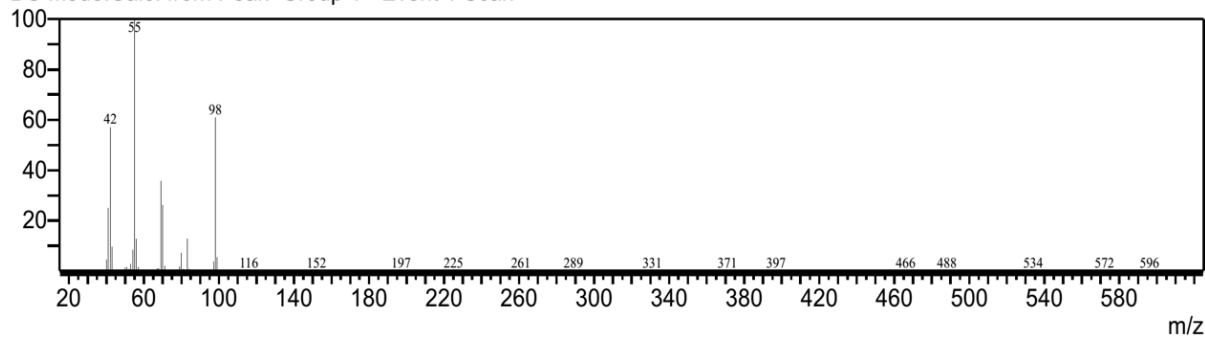

Entry 15

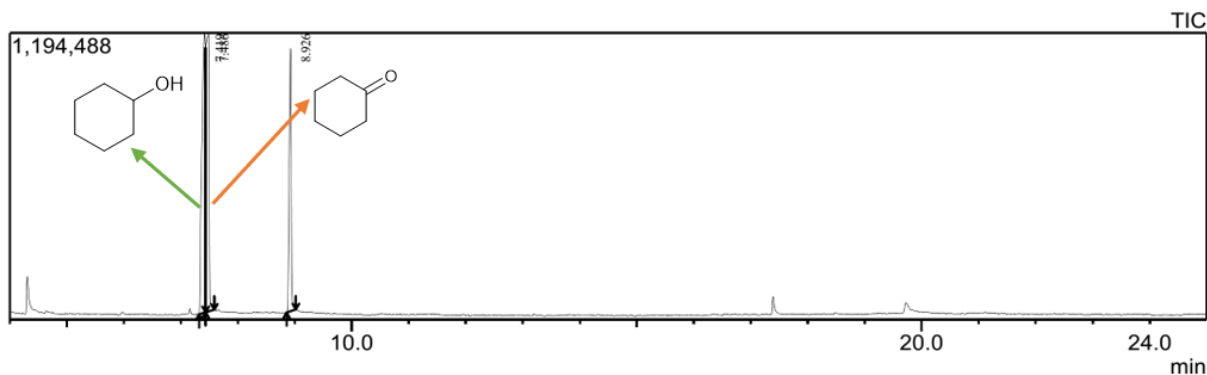

Peak Report TIC

| Peak# | R.Time | Area    | Area%  | Height  | Height% | A/H  | Name          |
|-------|--------|---------|--------|---------|---------|------|---------------|
| 1     | 7.419  | 5196937 | 41.90  | 1164726 | 34.11   | 4.46 | Cyclohexanol  |
| 2     | 7.486  | 4404088 | 35.50  | 1156344 | 33.86   | 3.81 | Cyclohexanone |
| 3     | 8.926  | 2803401 | 22.60  | 1093583 | 32.03   | 2.56 | Decane        |
|       |        | 2404426 | 100.00 | 3414653 | 100.00  |      |               |

Line#:1 R.Time:7.420(Scan#:685)

MassPeaks:300

RawMode:Averaged 7.415-7.425(684-686) BasePeak:57(103066)

BG Mode:Calc. from Peak Group 1 - Event 1 Scan

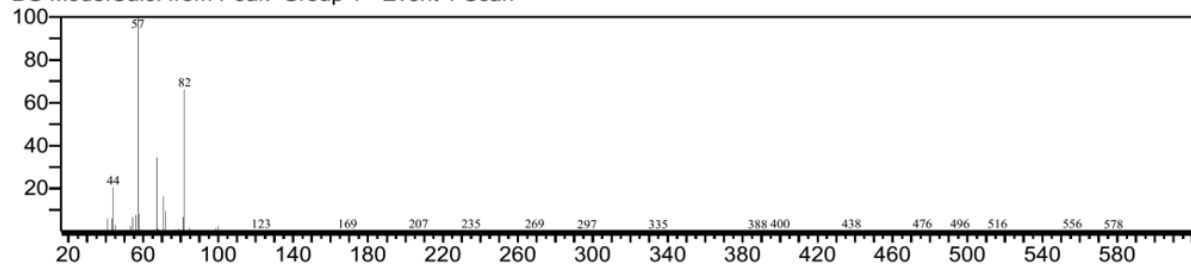

Line#:2 R.Time:7.485(Scan#:698)

MassPeaks:219

RawMode:Averaged 7.480-7.490(697-699) BasePeak:55(113212)

BG Mode:Calc. from Peak Group 1 - Event 1 Scan

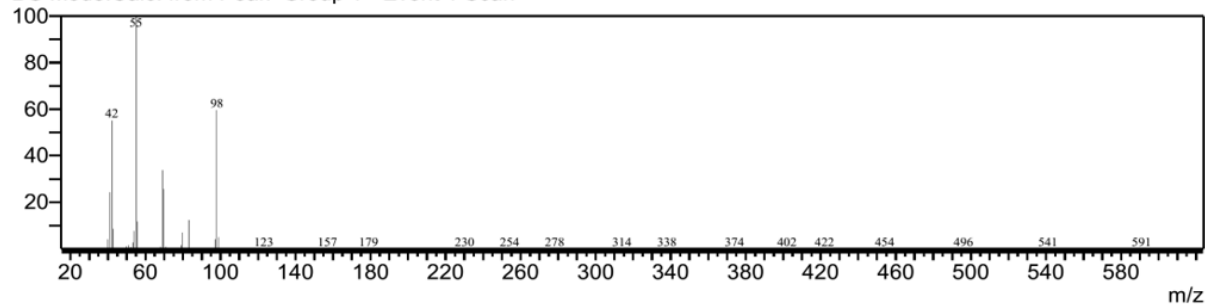

Entry 16

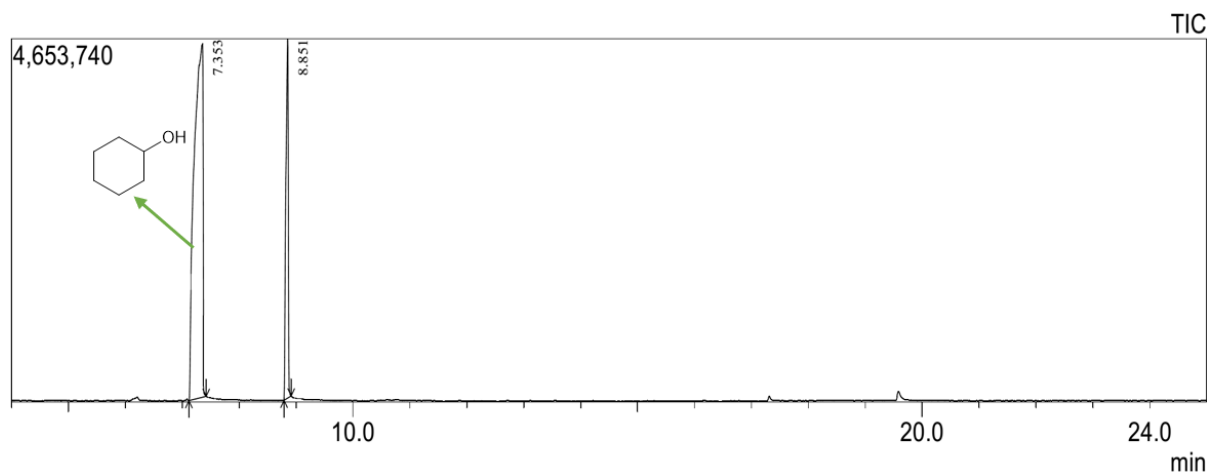

Peak Report TIC

| Peak# | R.Time | Area     | Area%  | Height  | Height% | A/H   | Name         |
|-------|--------|----------|--------|---------|---------|-------|--------------|
| 1     | 7.353  | 7947032  | 78.87  | 4531444 | 49.62   | 10.58 | Cyclohexanol |
| 2     | 8.851  | 2848439  | 21.13  | 4600731 | 50.38   | 2.79  | Decane       |
|       |        | 10795471 | 100.00 | 9132175 | 100.00  |       |              |

Line#:1 R.Time:7.355(Scan#:672)

MassPeaks:332

RawMode:Averaged 7.350-7.360(671-673) BasePeak:57(1297951)

BG Mode:Calc. from Peak Group 1 - Event 1 Scan

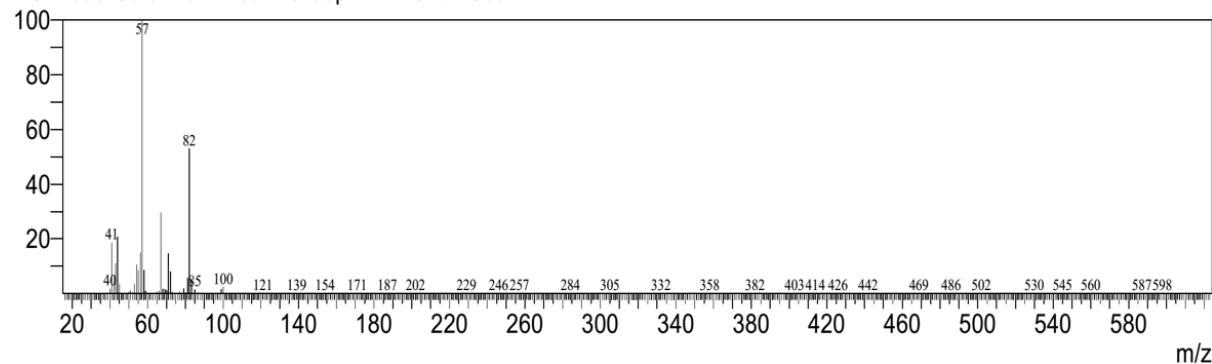



Entry 17

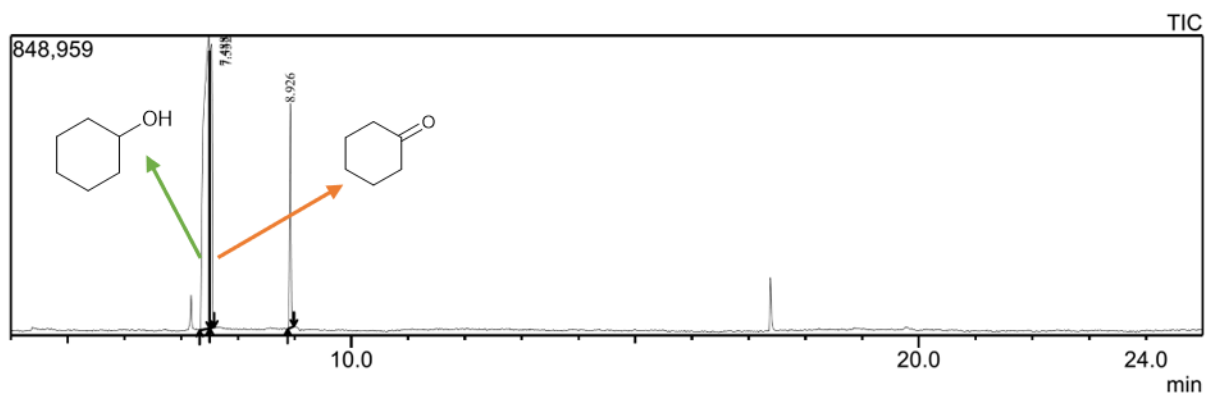

Peak Report TIC

| Peak# | R.Time | Area    | Area%  | Height  | Height% | A/H  | Name          |
|-------|--------|---------|--------|---------|---------|------|---------------|
| 1     | 7.488  | 6230132 | 67.23  | 828492  | 36.53   | 7.52 | Cyclohexanol  |
| 2     | 7.532  | 1984510 | 21.41  | 803799  | 35.44   | 2.47 | Cyclohexanone |
| 3     | 8.926  | 1052664 | 11.36  | 635461  | 28.02   | 1.66 | Decane        |
|       |        | 9267306 | 100.00 | 2267752 | 100.00  |      |               |

Line#:1 R.Time:7.490(Scan#:699)

MassPeaks:298

RawMode:Averaged 7.485-7.495(698-700) BasePeak:57(80476)

BG Mode:Calc. from Peak Group 1 - Event 1 Scan

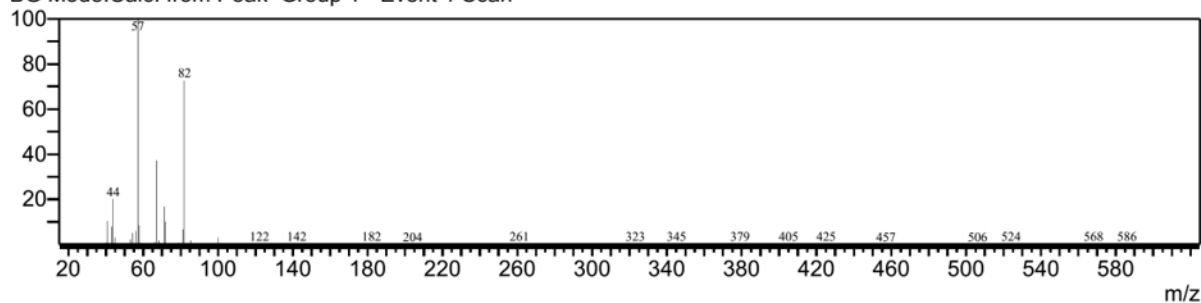

Line#:2 R.Time:7.530(Scan#:707)

MassPeaks:257

RawMode:Averaged 7.525-7.535(706-708) BasePeak:55(69094)

BG Mode:Calc. from Peak Group 1 - Event 1 Scan

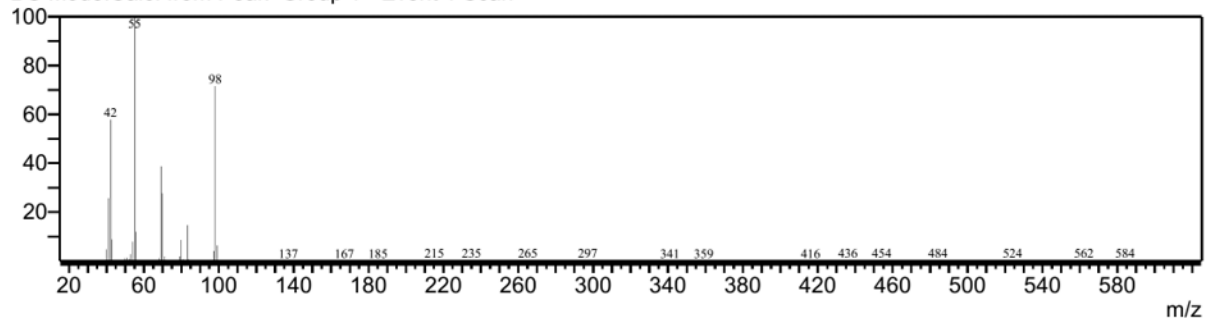

Entry 18

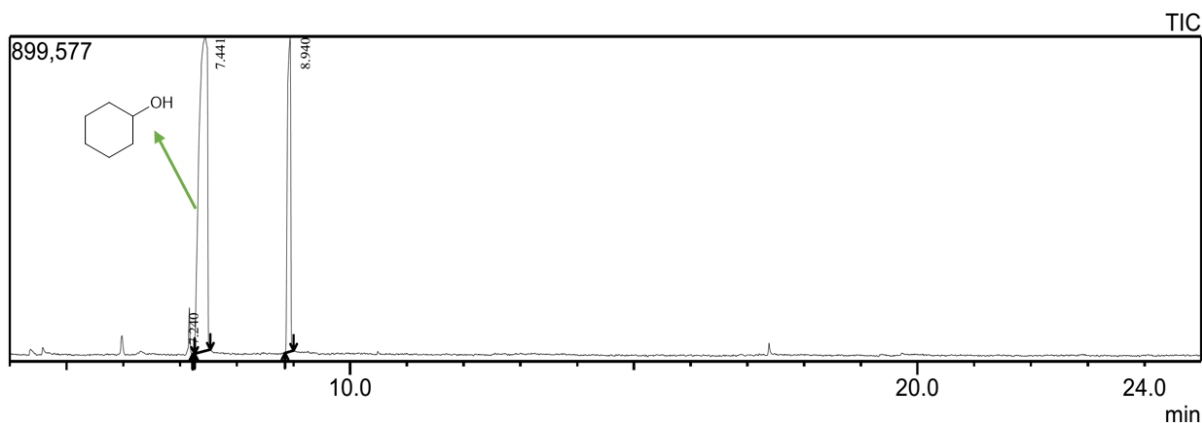

Peak Report TIC

| Peak# | R.Time | Area    | Area%  | Height  | Height% | A/H   | Name         |
|-------|--------|---------|--------|---------|---------|-------|--------------|
| 1     | 7.240  | 33878   | 0.27   | 23138   | 1.31    | 1.46  | Cyclohexanol |
| 2     | 7.441  | 9016110 | 71.64  | 870276  | 49.39   | 10.36 | Cyclohexanol |
| 3     | 8.940  | 3534631 | 28.09  | 868676  | 49.30   | 4.07  | Decane       |
|       |        | 2584619 | 100.00 | 1762090 | 100.00  |       |              |

Line#:2 R.Time:7.440(Scan#:689)

MassPeaks:313

RawMode:Averaged 7.435-7.445(688-690) BasePeak:57(190995)

BG Mode:Calc. from Peak Group 1 - Event 1 Scan

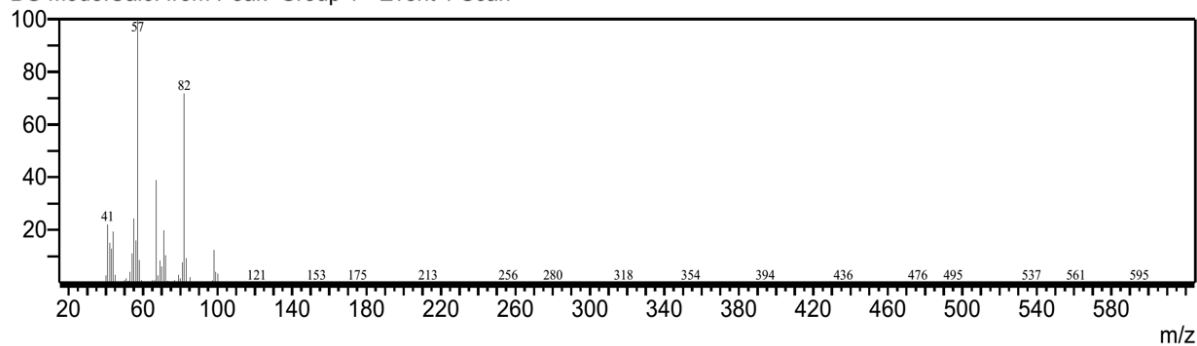

Entry 19

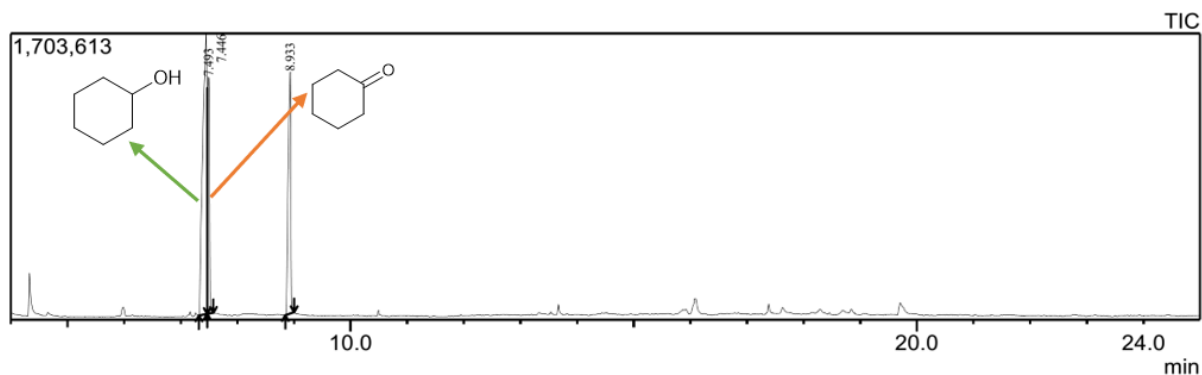

Peak Report TIC

| Peak# | R.Time | Area    | Area%  | Height  | Height% | A/H  | Name          |
|-------|--------|---------|--------|---------|---------|------|---------------|
| 1     | 7.446  | 8503554 | 50.36  | 1668665 | 36.97   | 5.10 | Cyclohexanol  |
| 2     | 7.493  | 3721159 | 22.04  | 1407515 | 31.18   | 2.64 | Cyclohexanone |
| 3     | 8.933  | 4661482 | 27.61  | 1437306 | 31.84   | 3.24 | Decane        |
|       |        | 6886195 | 100.00 | 4513486 | 100.00  |      |               |

Line#:1 R.Time:7.445(Scan#:690)

MassPeaks:314

RawMode:Averaged 7.440-7.450(689-691) BasePeak:57(217608)

BG Mode:Calc. from Peak Group 1 - Event 1 Scan

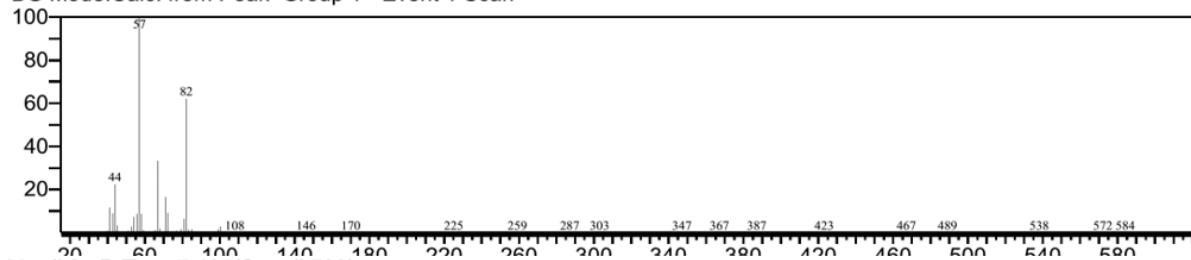

Line#:2 R.Time:7.495(Scan#:700)

MassPeaks:292

RawMode:Averaged 7.490-7.500(699-701) BasePeak:55(112736)

BG Mode:Calc. from Peak Group 1 - Event 1 Scan

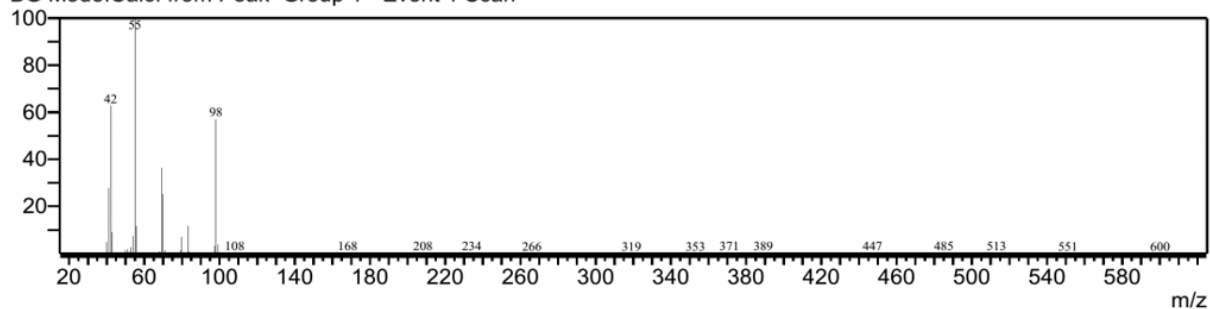

Entry 20

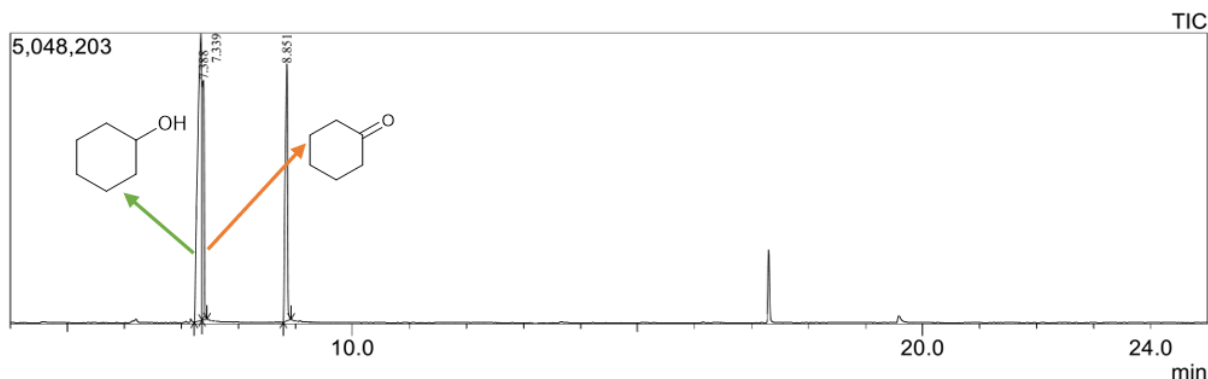

| Peak Report TIC |        |         |        |          |         |                    |
|-----------------|--------|---------|--------|----------|---------|--------------------|
| Peak#           | R.Time | Area    | Area%  | Height   | Height% | A/H Name           |
| 1               | 7.339  | 4624296 | 52.39  | 4988924  | 36.65   | 4.94 Cyclohexanol  |
| 2               | 7.388  | 0352401 | 22.03  | 4161455  | 30.57   | 2.49 Cyclohexanone |
| 3               | 8.851  | 2022078 | 25.58  | 4461248  | 32.78   | 2.69 Decane        |
|                 |        | 6998775 | 100.00 | 13611627 | 100.00  |                    |

Line#:1 R.Time:7.340(Scan#:669)  
 MassPeaks:280  
 RawMode:Averaged 7.335-7.345(668-670) BasePeak:57(720889)  
 BG Mode:Calc. from Peak Group 1 - Event 1 Scan

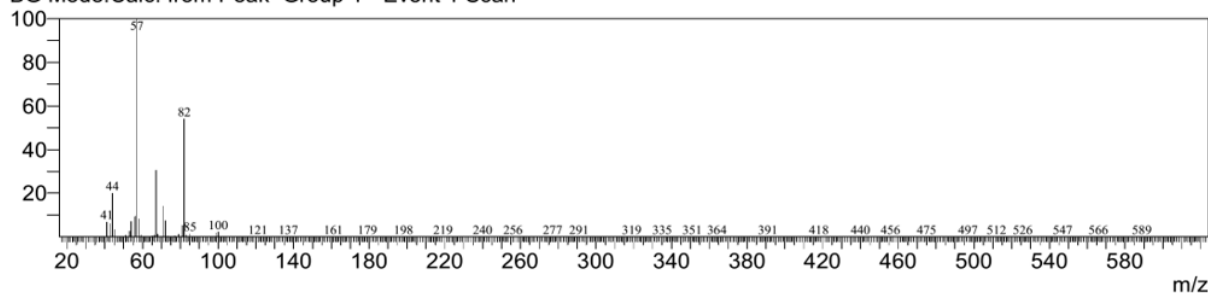

Line#:2 R.Time:7.390(Scan#:679)  
 MassPeaks:327  
 RawMode:Averaged 7.385-7.395(678-680) BasePeak:55(389672)  
 BG Mode:Calc. from Peak Group 1 - Event 1 Scan

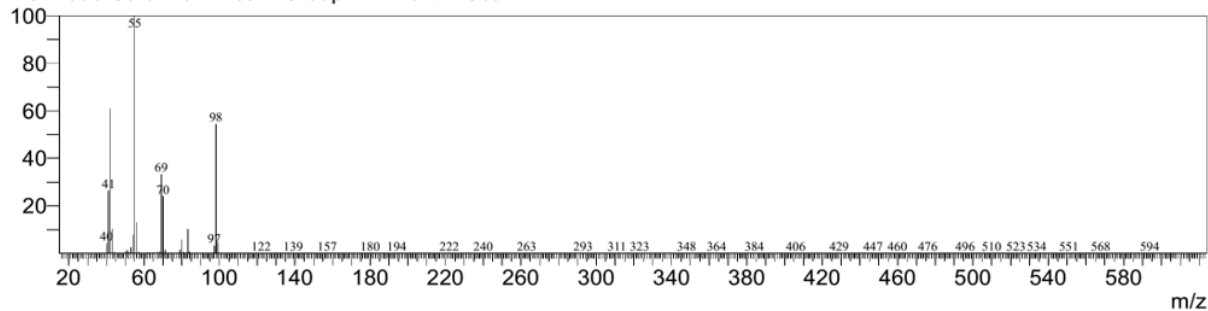

Entry 21

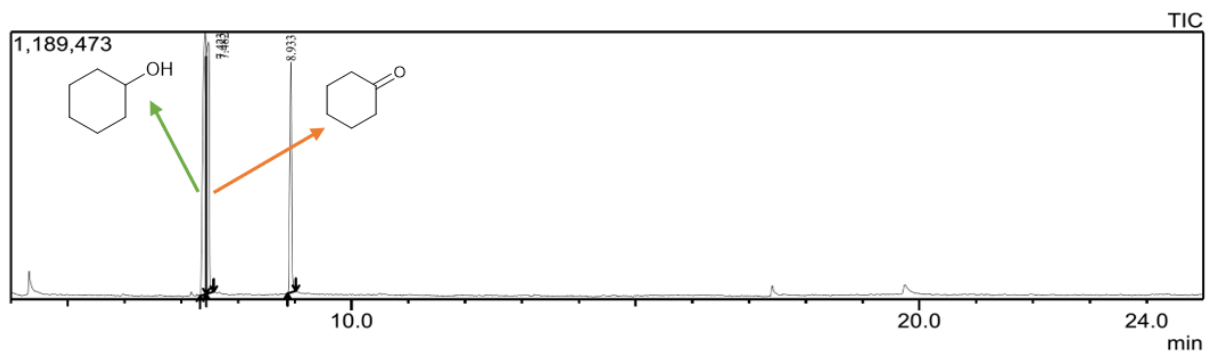

Peak Report TIC

| Peak# | R.Time | Area    | Area%  | Height  | Height% | A/H  | Name          |
|-------|--------|---------|--------|---------|---------|------|---------------|
| 1     | 7.423  | 4826553 | 43.95  | 1166136 | 35.25   | 4.14 | Cyclohexanol  |
| 2     | 7.482  | 3776462 | 34.39  | 1117549 | 33.78   | 3.38 | Cyclohexanone |
| 3     | 8.933  | 2377737 | 21.65  | 1024180 | 30.96   | 2.32 | Decane        |
|       |        | 0980752 | 100.00 | 3307865 | 100.00  |      |               |

Line#:1 R.Time:7.425(Scan#:686)  
 MassPeaks:250  
 RawMode:Averaged 7.420-7.430(685-687) BasePeak:57(133058)  
 BG Mode:Calc. from Peak Group 1 - Event 1 Scan

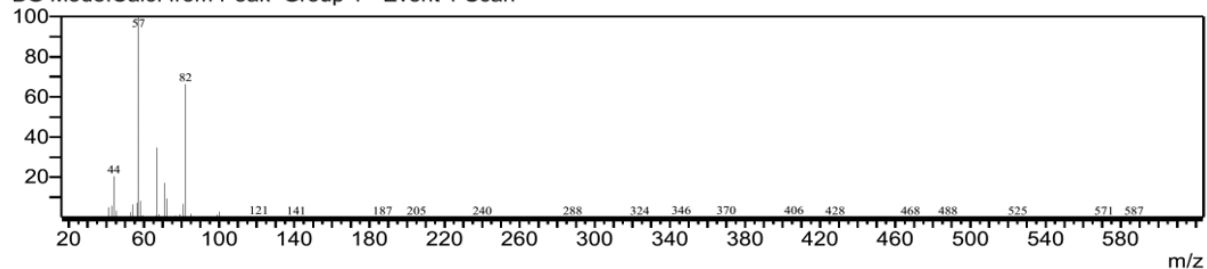

Line#:2 R.Time:7.480(Scan#:697)  
 MassPeaks:295  
 RawMode:Averaged 7.475-7.485(696-698) BasePeak:55(105319)  
 BG Mode:Calc. from Peak Group 1 - Event 1 Scan

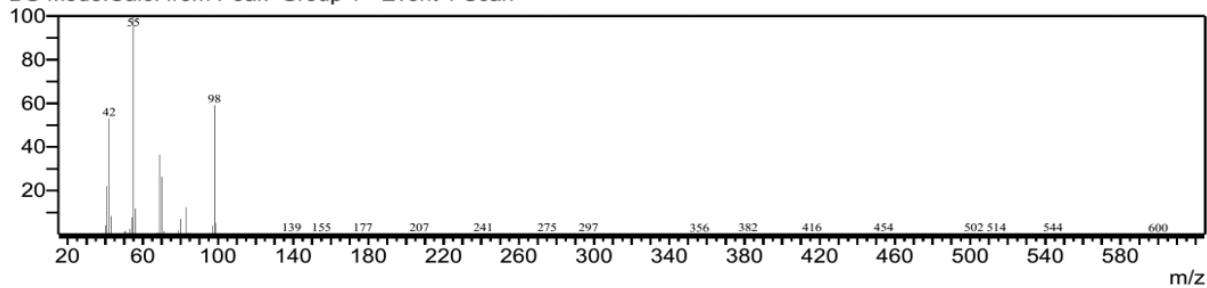

Entry 22

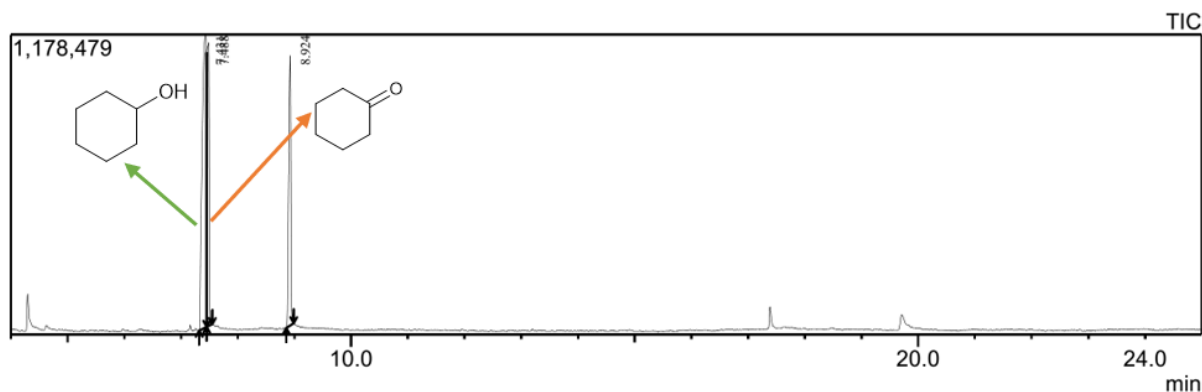

Peak Report TIC

| Peak# | R.Time | Area     | Area%  | Height  | Height% | A/H  | Name          |
|-------|--------|----------|--------|---------|---------|------|---------------|
| 1     | 7.431  | 6057901  | 49.61  | 1150046 | 34.62   | 5.27 | Cyclohexanol  |
| 2     | 7.488  | 3345944  | 27.40  | 1112144 | 33.48   | 3.01 | Cyclohexanone |
| 3     | 8.924  | 2807734  | 22.99  | 1060080 | 31.91   | 2.65 | Decane        |
|       |        | 12211579 | 100.00 | 3322270 | 100.00  |      |               |

Line#:1 R.Time:7.430(Scan#:687)

MassPeaks:290

RawMode:Averaged 7.425-7.435(686-688) BasePeak:57(141562)

BG Mode:Calc. from Peak Group 1 - Event 1 Scan

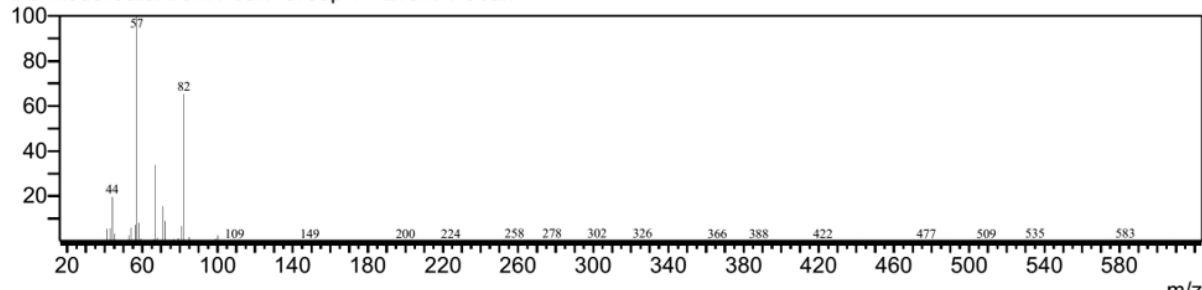

Line#:2 R.Time:7.490(Scan#:699)

MassPeaks:287

RawMode:Averaged 7.485-7.495(698-700) BasePeak:55(120908)

BG Mode:Calc. from Peak Group 1 - Event 1 Scan

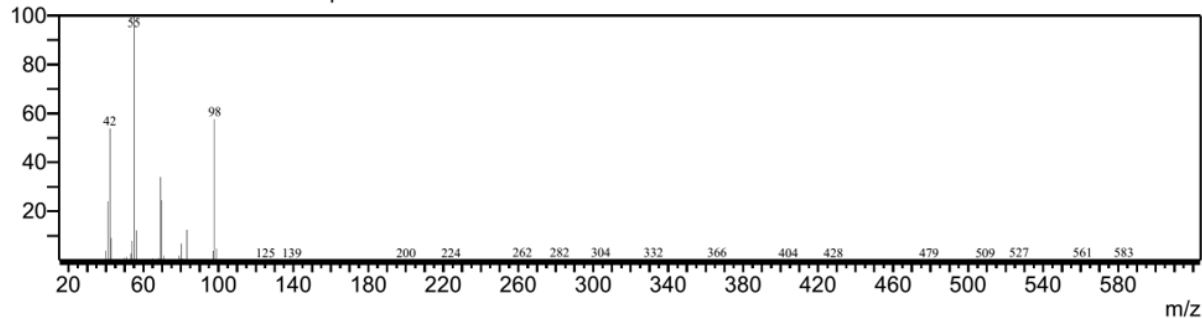

Entry 23

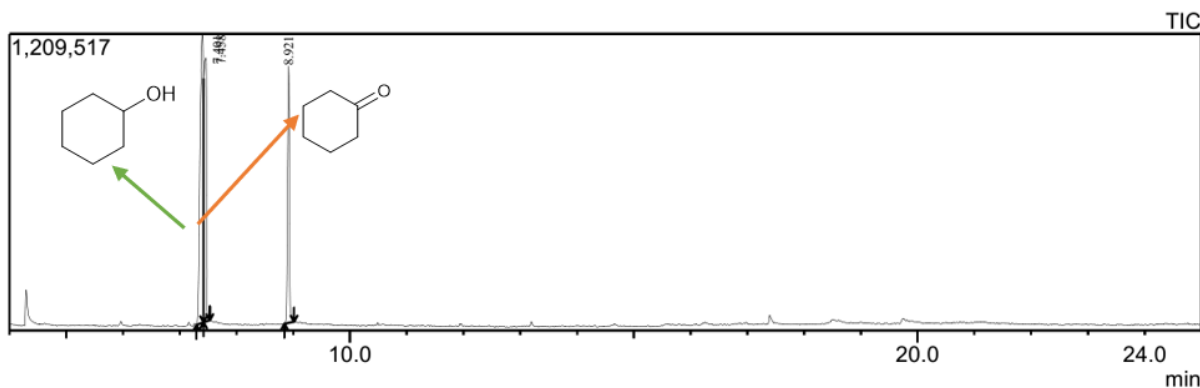

Peak Report TIC

| Peak# | R.Time | Area    | Area%  | Height  | Height% | A/H  | Name          |
|-------|--------|---------|--------|---------|---------|------|---------------|
| 1     | 7.401  | 5010601 | 46.68  | 1177350 | 35.68   | 4.26 | Cyclohexanol  |
| 2     | 7.458  | 3350205 | 31.21  | 1075561 | 32.59   | 3.11 | Cyclohexanone |
| 3     | 8.921  | 2373023 | 22.11  | 1046915 | 31.73   | 2.27 | Decane        |
|       |        | 0733829 | 100.00 | 3299826 | 100.00  |      |               |

Line#:1 R.Time:7.400(Scan#:681)  
 MassPeaks:251  
 RawMode:Averaged 7.395-7.405(680-682) BasePeak:57(184757)  
 BG Mode:Calc. from Peak Group 1 - Event 1 Scan

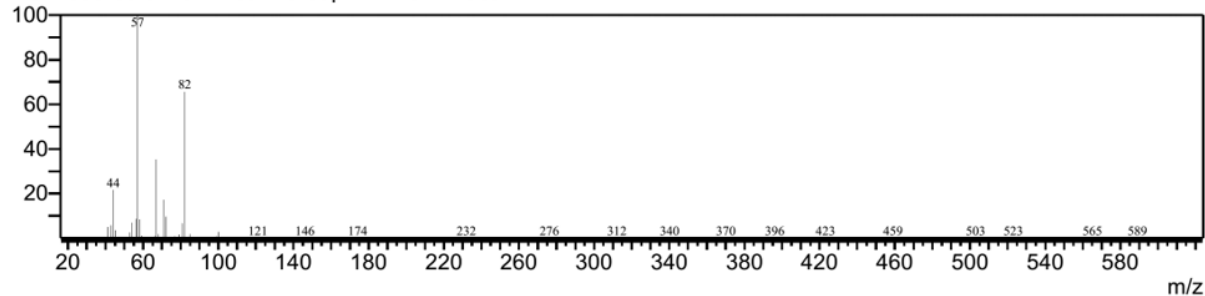

Line#:2 R.Time:7.460(Scan#:693)  
 MassPeaks:252  
 RawMode:Averaged 7.455-7.465(692-694) BasePeak:55(115652)  
 BG Mode:Calc. from Peak Group 1 - Event 1 Scan

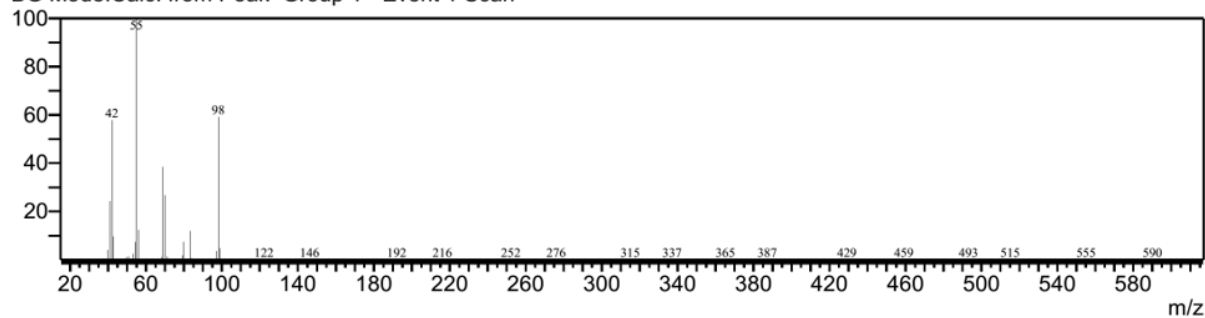

Entry 24

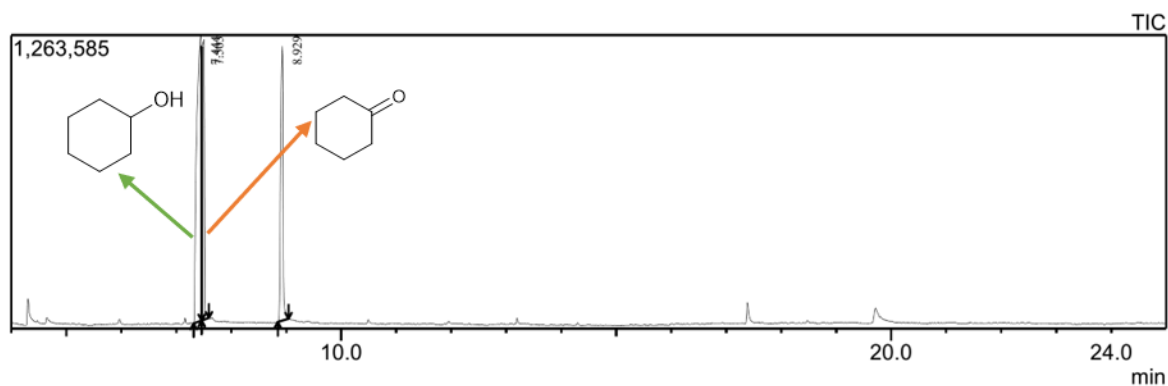

Peak Report TIC

| Peak# | R.Time | Area    | Area%  | Height  | Height% | A/H  | Name          |
|-------|--------|---------|--------|---------|---------|------|---------------|
| 1     | 7.444  | 7398364 | 49.03  | 1229007 | 33.99   | 6.02 | Cyclohexanol  |
| 2     | 7.503  | 3994531 | 26.47  | 1205346 | 33.34   | 3.31 | Cyclohexanone |
| 3     | 8.929  | 3697045 | 24.50  | 1181153 | 32.67   | 3.13 | Decane        |
|       |        | 5089940 | 100.00 | 3615506 | 100.00  |      |               |

Line#:1 R.Time:7.445(Scan#:690)  
 MassPeaks:318  
 RawMode:Averaged 7.440-7.450(689-691) BasePeak:57(103029)  
 BG Mode:Calc. from Peak Group 1 - Event 1 Scan

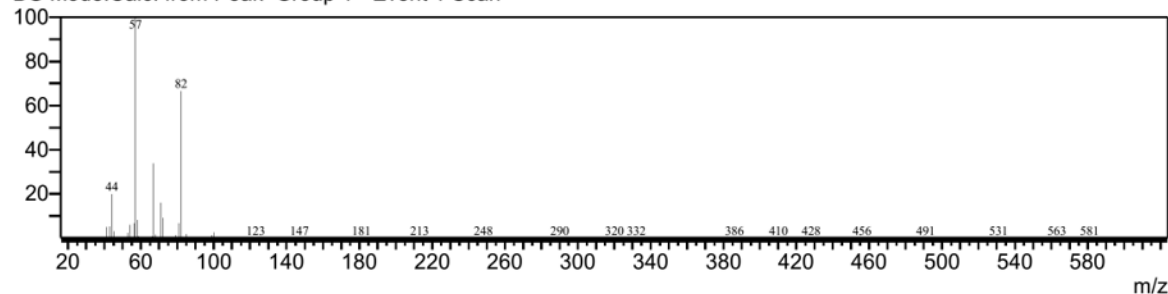

Line#:2 R.Time:7.505(Scan#:702)  
 MassPeaks:302  
 RawMode:Averaged 7.500-7.510(701-703) BasePeak:55(108465)  
 BG Mode:Calc. from Peak Group 1 - Event 1 Scan

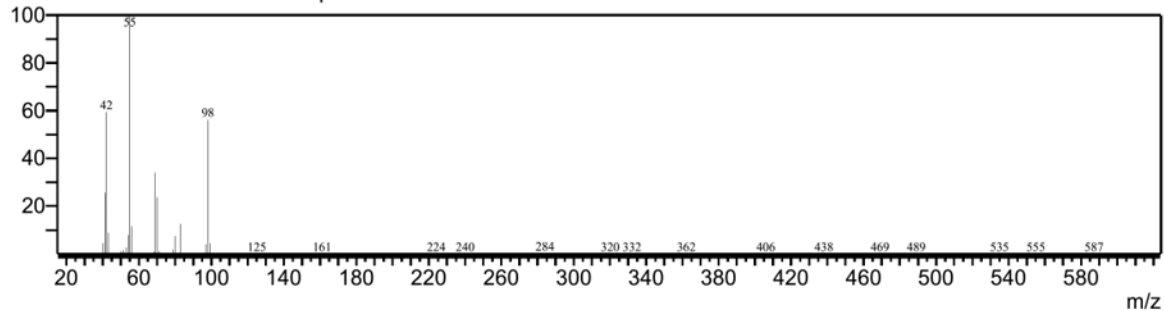



Entry 25

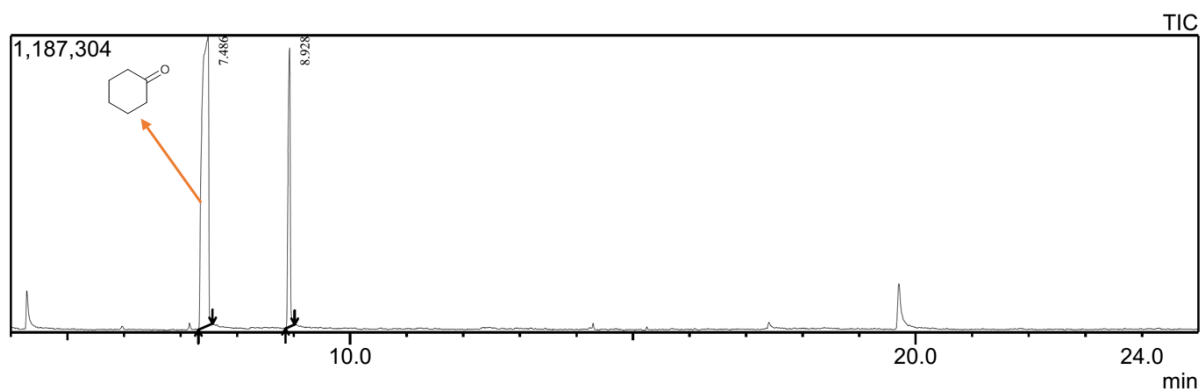

Peak Report TIC

| Peak# | R.Time | Area    | Area%  | Height  | Height% | A/H  | Name          |
|-------|--------|---------|--------|---------|---------|------|---------------|
| 1     | 7.486  | 9654031 | 75.70  | 1158761 | 50.95   | 8.33 | Cyclohexanone |
| 2     | 8.928  | 3098741 | 24.30  | 1115372 | 49.05   | 2.78 | Decane        |
|       |        | 2752772 | 100.00 | 2274133 | 100.00  |      |               |

Line#:1 R.Time:7.485(Scan#:698)

MassPeaks:308

RawMode:Averaged 7.480-7.490(697-699) BasePeak:55(302063)

BG Mode:Calc. from Peak Group 1 - Event 1 Scan

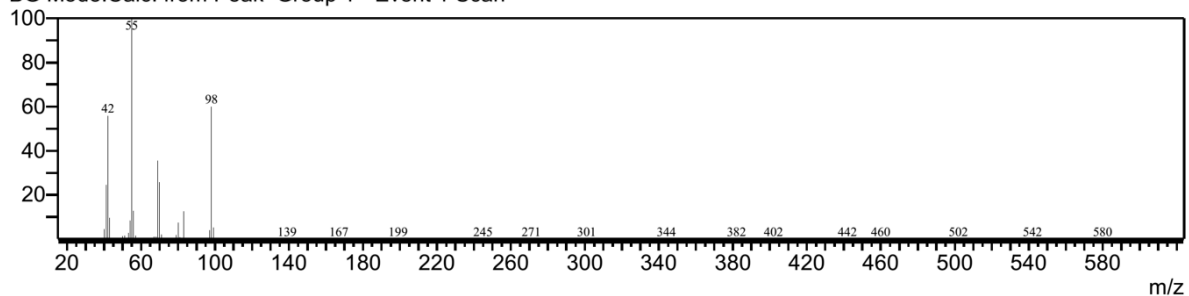

Entry 26

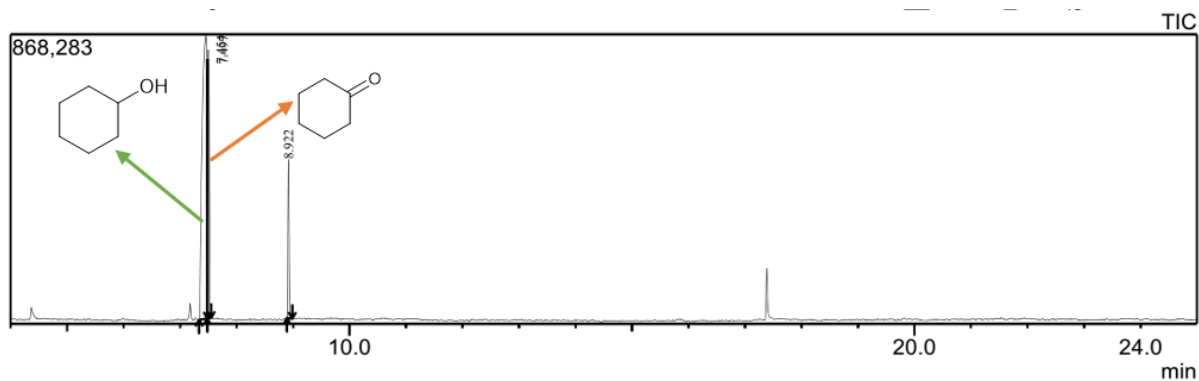

Peak Report TIC

| Peak# | R.Time | Area    | Area%  | Height  | Height% | A/H  | Name          |
|-------|--------|---------|--------|---------|---------|------|---------------|
| 1     | 7.454  | 5041525 | 67.35  | 852405  | 39.93   | 5.91 | Cyclohexanol  |
| 2     | 7.497  | 1767669 | 23.61  | 805195  | 37.72   | 2.20 | Cyclohexanone |
| 3     | 8.922  | 676541  | 9.04   | 476973  | 22.35   | 1.42 | Decane        |
|       |        | 7485735 | 100.00 | 2134573 | 100.00  |      |               |

Line#:1 R.Time:7.455(Scan#:692)

MassPeaks:303

RawMode:Averaged 7.450-7.460(691-693) BasePeak:57(112419)

BG Mode:Calc. from Peak Group 1 - Event 1 Scan

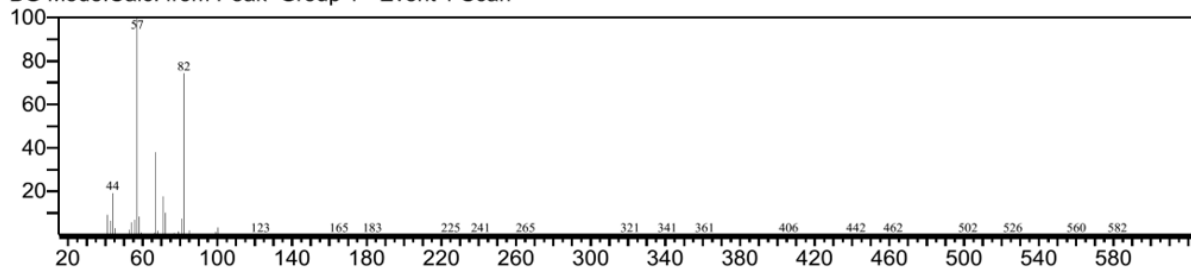

Line#:2 R.Time:7.495(Scan#:700)

MassPeaks:325

RawMode:Averaged 7.490-7.500(699-701) BasePeak:55(47001)

BG Mode:Calc. from Peak Group 1 - Event 1 Scan

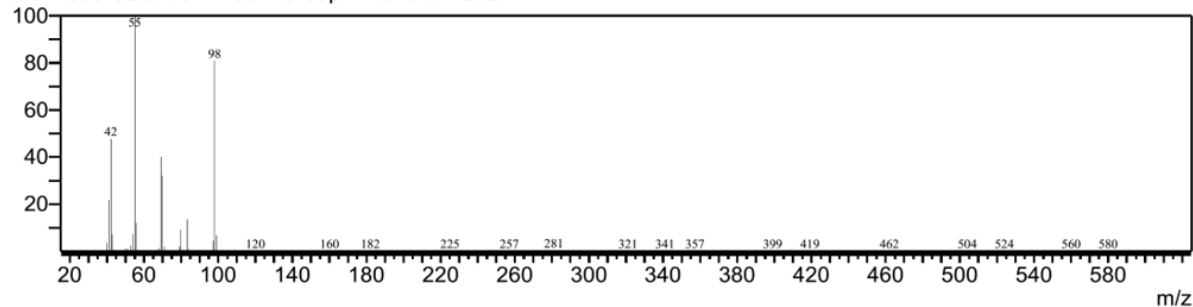

Entry 27

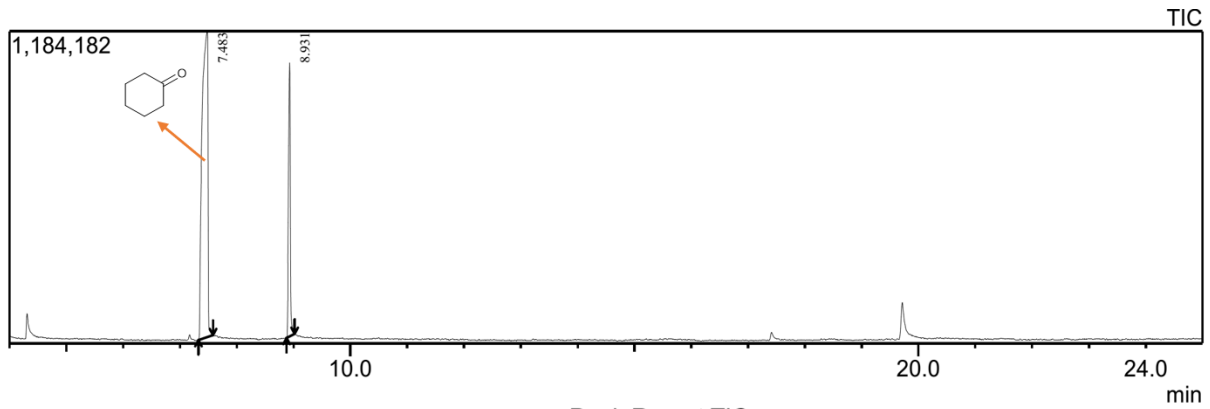

Peak Report TIC

| Peak# | R.Time | Area    | Area%  | Height  | Height% | A/H  | Name          |
|-------|--------|---------|--------|---------|---------|------|---------------|
| 1     | 7.483  | 8473977 | 78.43  | 1159066 | 52.77   | 7.31 | Cyclohexanone |
| 2     | 8.931  | 2330950 | 21.57  | 1037212 | 47.23   | 2.25 | Decane        |
|       |        | 0804927 | 100.00 | 2196278 | 100.00  |      |               |

Line#:1 R.Time:7.485(Scan#:698)

MassPeaks:278

RawMode:Averaged 7.480-7.490(697-699) BasePeak:55(298033)

BG Mode:Calc. from Peak Group 1 - Event 1 Scan

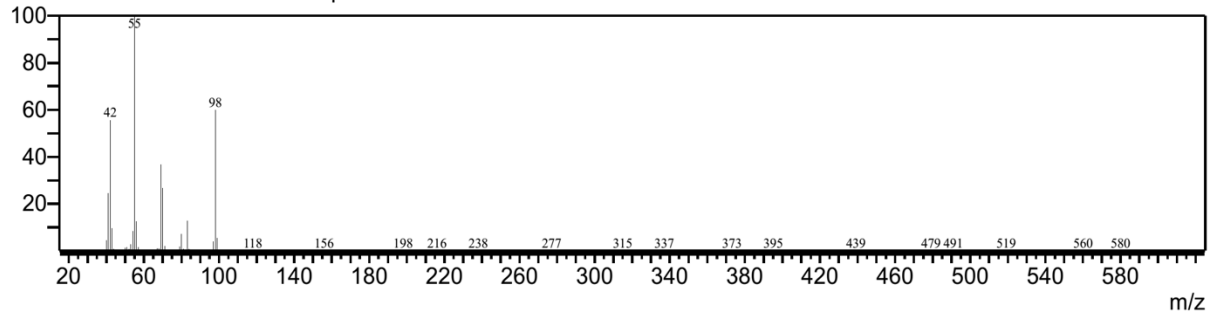

Entry 28

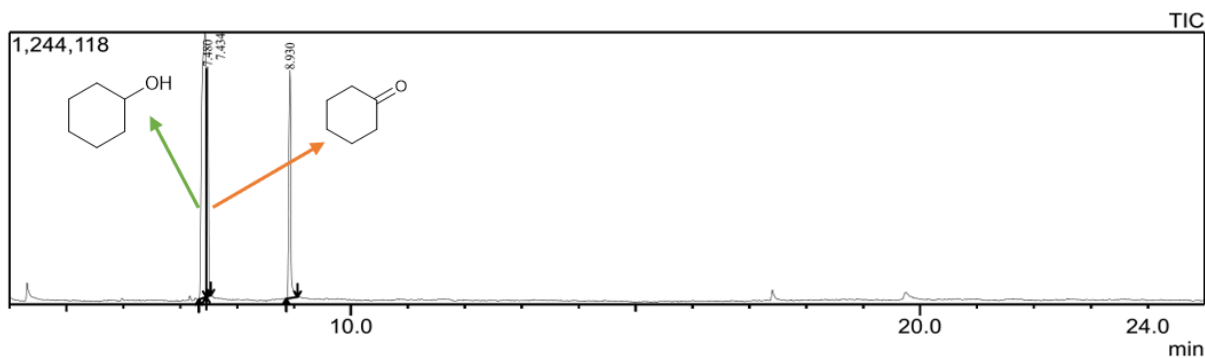

Peak Report TIC

| Peak# | R.Time | Area     | Area%  | Height  | Height% | A/H  | Name          |
|-------|--------|----------|--------|---------|---------|------|---------------|
| 1     | 7.434  | 6361110  | 55.89  | 1210916 | 36.69   | 5.25 | Cyclohexanol  |
| 2     | 7.480  | 2495533  | 21.92  | 1047638 | 31.74   | 2.38 | Cyclohexanone |
| 3     | 8.930  | 2525705  | 22.19  | 1041975 | 31.57   | 2.42 | Decane        |
|       |        | 11382348 | 100.00 | 3300529 | 100.00  |      |               |

Line#:1 R.Time:7.435(Scan#:688)  
 MassPeaks:301  
 RawMode:Averaged 7.430-7.440(687-689) BasePeak:57(190229)  
 BG Mode:Calc. from Peak Group 1 - Event 1 Scan

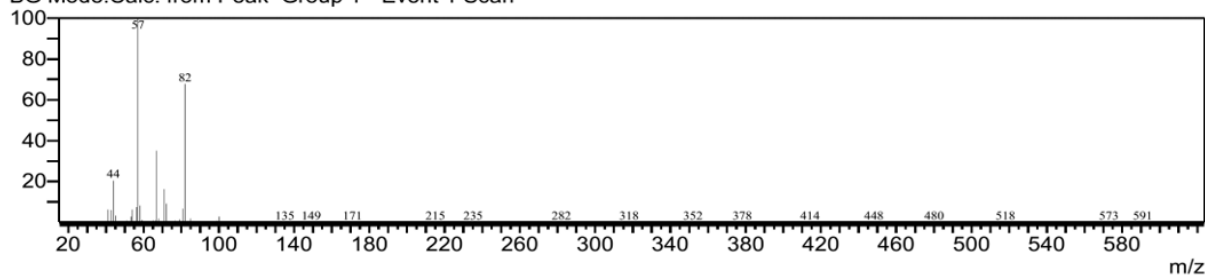

Line#:2 R.Time:7.480(Scan#:697)  
 MassPeaks:307  
 RawMode:Averaged 7.475-7.485(696-698) BasePeak:55(87304)  
 BG Mode:Calc. from Peak Group 1 - Event 1 Scan

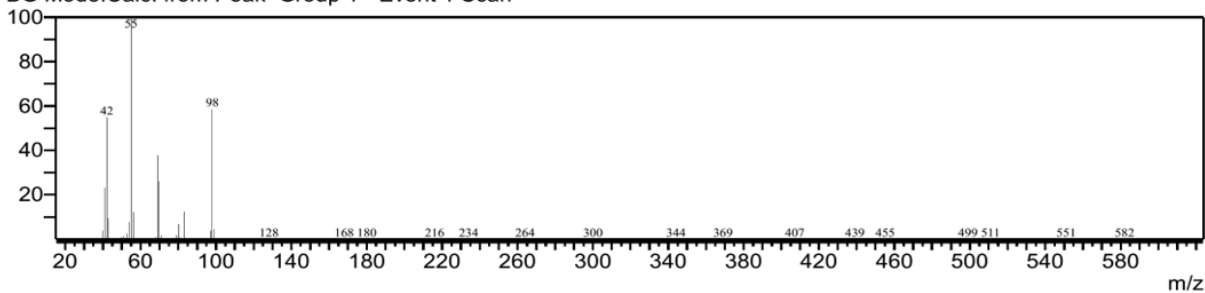

Entry 29

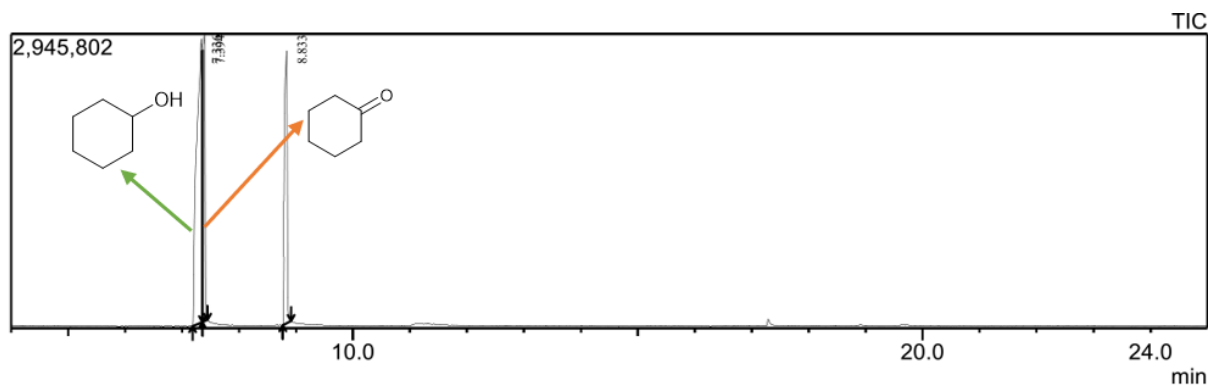

Peak Report TIC

| Peak# | R.Time | Area     | Area%  | Height  | Height% | A/H  | Name          |
|-------|--------|----------|--------|---------|---------|------|---------------|
| 1     | 7.336  | 19136611 | 52.21  | 2840628 | 33.66   | 6.74 | Cyclohexanol  |
| 2     | 7.394  | 8589342  | 23.43  | 2872603 | 34.04   | 2.99 | Cyclohexanone |
| 3     | 8.833  | 8928761  | 24.36  | 2725460 | 32.30   | 3.28 | Decane        |
|       |        | 6654714  | 100.00 | 8438691 | 100.00  |      |               |

Line#:1 R.Time:7.335(Scan#:668)

MassPeaks:310

RawMode:Averaged 7.330-7.340(667-669) BasePeak:57(169727)

BG Mode:Calc. from Peak Group 1 - Event 1 Scan

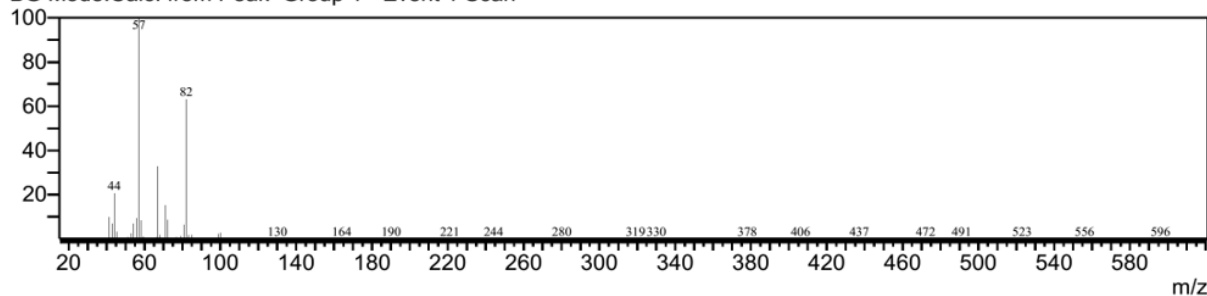

Line#:2 R.Time:7.395(Scan#:680)

MassPeaks:351

RawMode:Averaged 7.390-7.400(679-681) BasePeak:55(344037)

BG Mode:Calc. from Peak Group 1 - Event 1 Scan

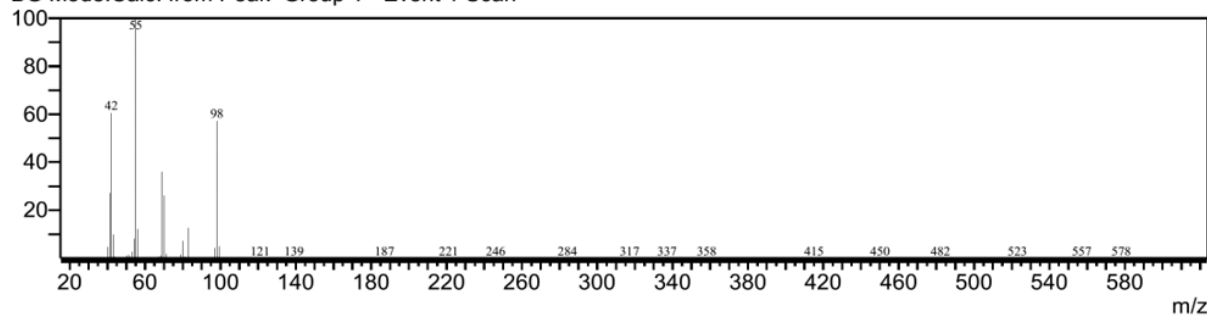

## GCMS of substrates (Table-3)

### GCMS of 10a:

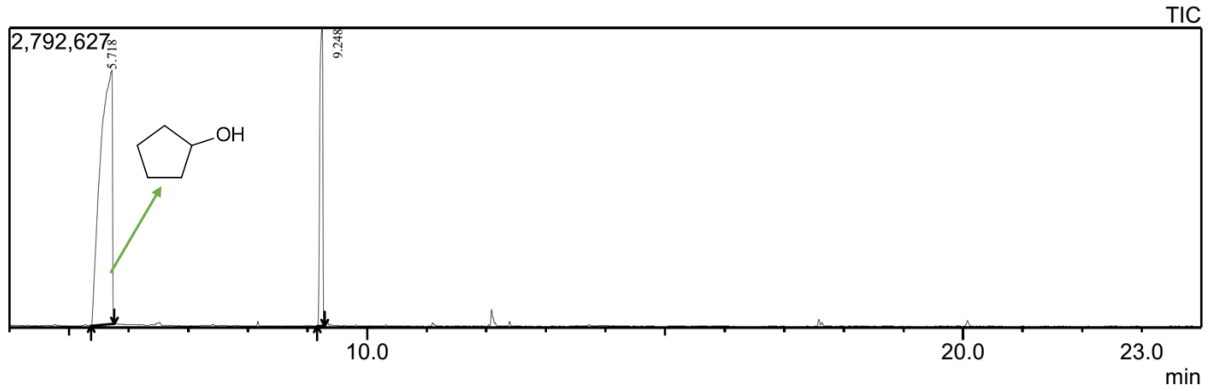

Peak Report TIC

| Peak# | R.Time | Area    | Area%  | Height  | Height% | A/H   | Name          |
|-------|--------|---------|--------|---------|---------|-------|---------------|
| 1     | 5.718  | 2826642 | 77.18  | 2366969 | 46.04   | 13.87 | Cyclopentanol |
| 2     | 9.248  | 9705917 | 22.82  | 2774558 | 53.96   | 3.50  | Decane        |
|       |        | 2532559 | 100.00 | 5141527 | 100.00  |       |               |

Line#:1 R.Time:5.720(Scan#:345)

MassPeaks:323

RawMode:Averaged 5.715-5.725(344-346) BasePeak:57(1047490)

BG Mode:Calc. from Peak Group 1 - Event 1 Scan

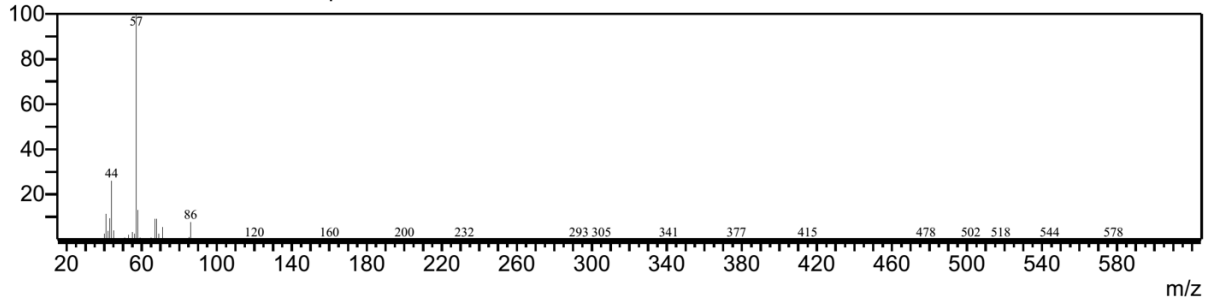

GCMS of 10b:

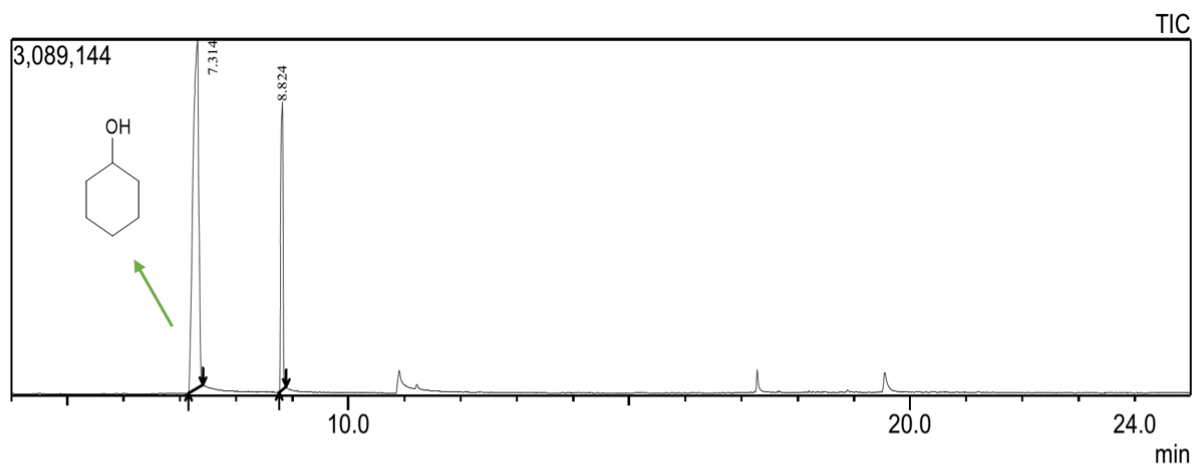

Peak Report TIC

| Peak# | R.Time | Area     | Area%  | Height  | Height% | A/H  | Name         |
|-------|--------|----------|--------|---------|---------|------|--------------|
| 1     | 7.314  | 21444886 | 74.91  | 3020184 | 54.77   | 7.10 | Cyclohexanol |
| 2     | 8.824  | 7184447  | 25.09  | 2493927 | 45.23   | 2.88 | Decane       |
|       |        | 28629333 | 100.00 | 5514111 | 100.00  |      |              |

Line#:1 R.Time:7.315(Scan#:664)

MassPeaks:313

RawMode:Averaged 7.310-7.320(663-665) BasePeak:57(620877)

BG Mode:Calc. from Peak Group 1 - Event 1 Scan

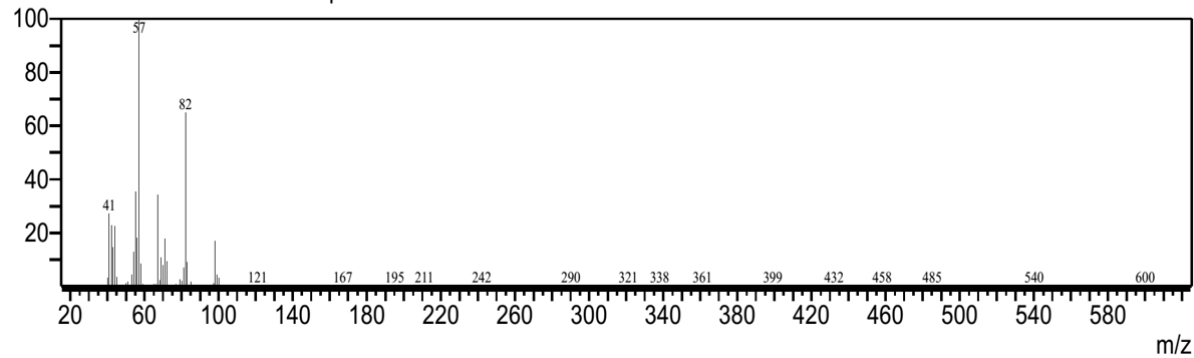

GCMS of 10c:

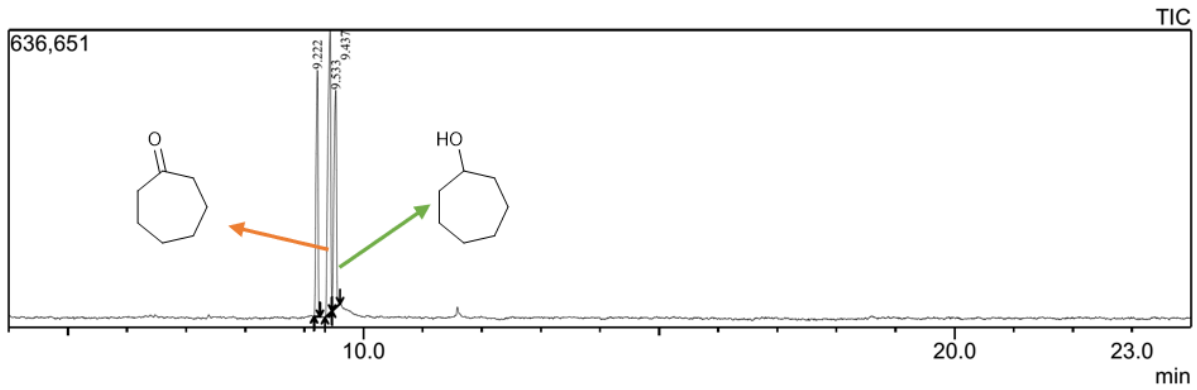

Peak Report TIC

| Peak# | R.Time | Area    | Area%  | Height  | Height% | A/H  | Name           |
|-------|--------|---------|--------|---------|---------|------|----------------|
| 1     | 9.222  | 1270086 | 26.69  | 527551  | 33.00   | 2.41 | Decane         |
| 2     | 9.437  | 2060325 | 43.29  | 605440  | 37.87   | 3.40 | Cycloheptanone |
| 3     | 9.533  | 1429113 | 30.03  | 465580  | 29.12   | 3.07 | Cycloheptanol  |
|       |        | 4759524 | 100.00 | 1598571 | 100.00  |      |                |

Line#:2 R.Time:9.435(Scan#:1088)  
 MassPeaks:315  
 RawMode:Averaged 9.430-9.440(1087-1089) BasePeak:55(93742)  
 BG Mode:Calc. from Peak Group 1 - Event 1 Scan

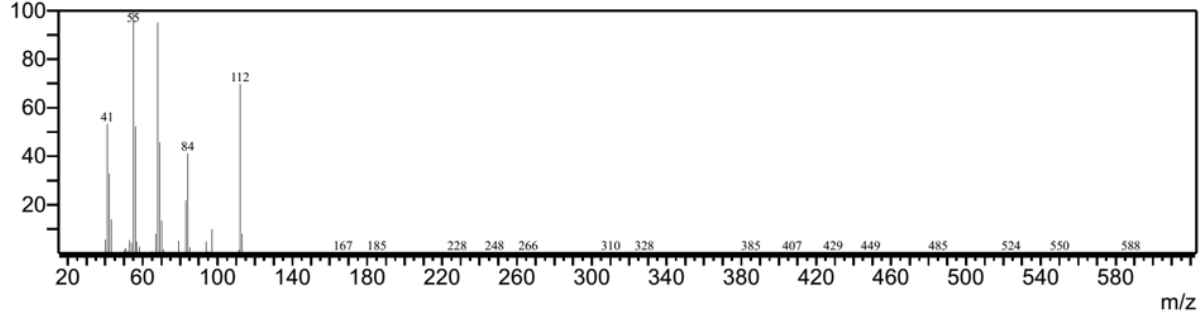

Line#:3 R.Time:9.530(Scan#:1107)  
 MassPeaks:323  
 RawMode:Averaged 9.525-9.535(1106-1108) BasePeak:57(98009)  
 BG Mode:Calc. from Peak Group 1 - Event 1 Scan

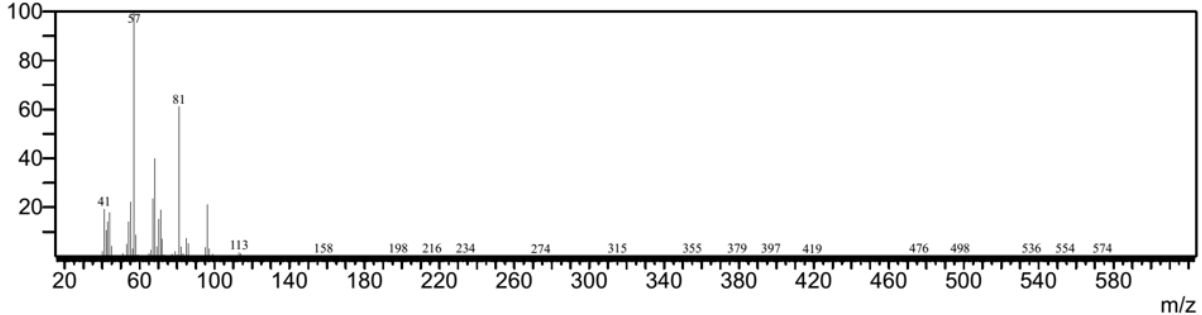



GCMS of 10d:

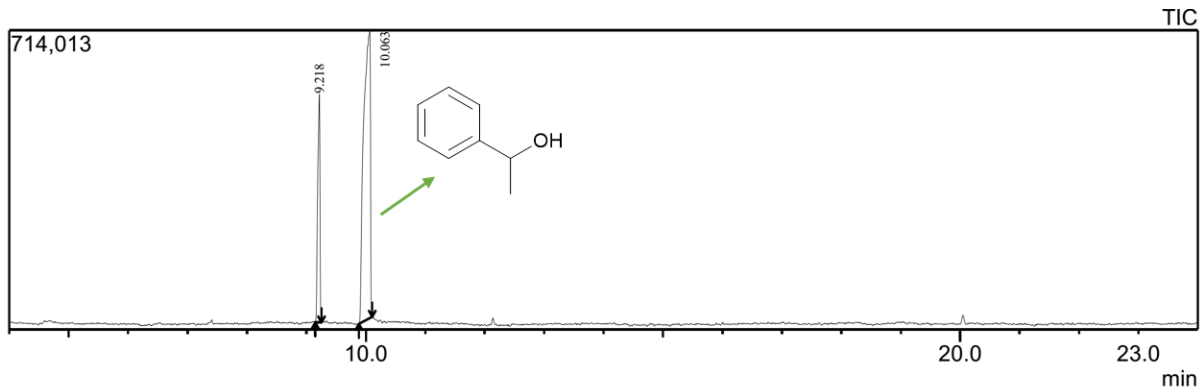

Peak Report TIC

| Peak# | R.Time | Area    | Area%  | Height  | Height% | A/H  | Name                             |
|-------|--------|---------|--------|---------|---------|------|----------------------------------|
| 1     | 9.218  | 1409954 | 20.87  | 544940  | 44.25   | 2.59 | Decane                           |
| 2     | 10.063 | 5345252 | 79.13  | 686495  | 55.75   | 7.79 | Benzenemethanol, .alpha.-methyl- |
|       |        | 6755206 | 100.00 | 1231435 | 100.00  |      |                                  |

Line#:2 R.Time:10.065(Scan#:1214)

MassPeaks:326

RawMode:Averaged 10.060-10.070(1213-1215) BasePeak:107(167773)

BG Mode:Calc. from Peak Group 1 - Event 1 Scan

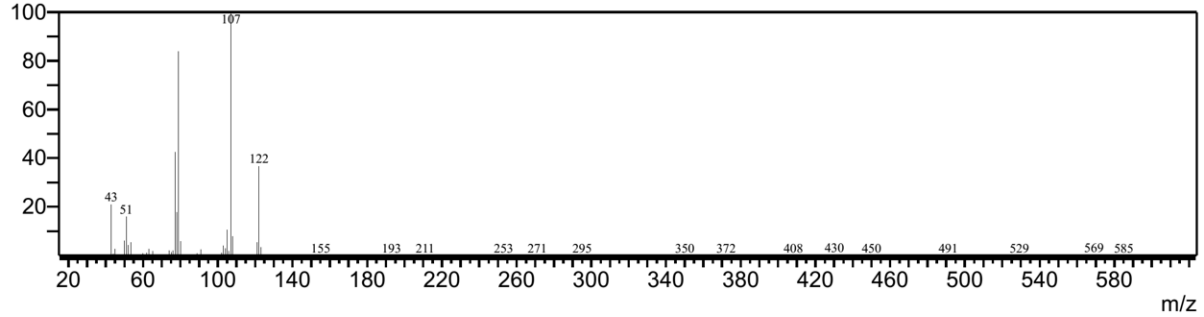

GCMS of 10e:

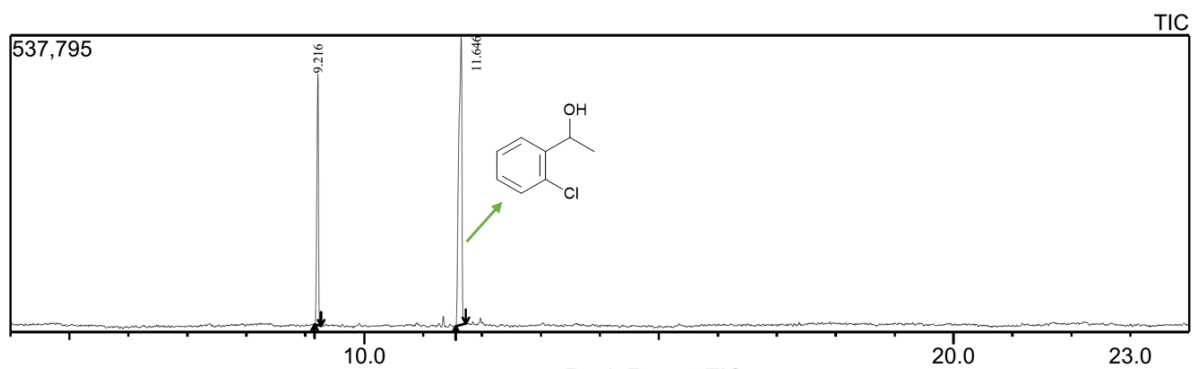

Peak Report TIC

| Peak# | R.Time | Area    | Area%  | Height | Height% | A/H  | Name                                      |
|-------|--------|---------|--------|--------|---------|------|-------------------------------------------|
| 1     | 9.216  | 902696  | 31.56  | 454971 | 46.47   | 1.98 | Decane                                    |
| 2     | 11.646 | 1957577 | 68.44  | 524116 | 53.53   | 3.74 | Benzenemethanol, 2-chloro-.alpha.-methyl- |
|       |        | 2860273 | 100.00 | 979087 | 100.00  |      |                                           |

Line#:2 R.Time:11.645(Scan#:1530)

MassPeaks:323

RawMode:Averaged 11.640-11.650(1529-1531) BasePeak:141(115805)

BG Mode:Calc. from Peak Group 1 - Event 1 Scan

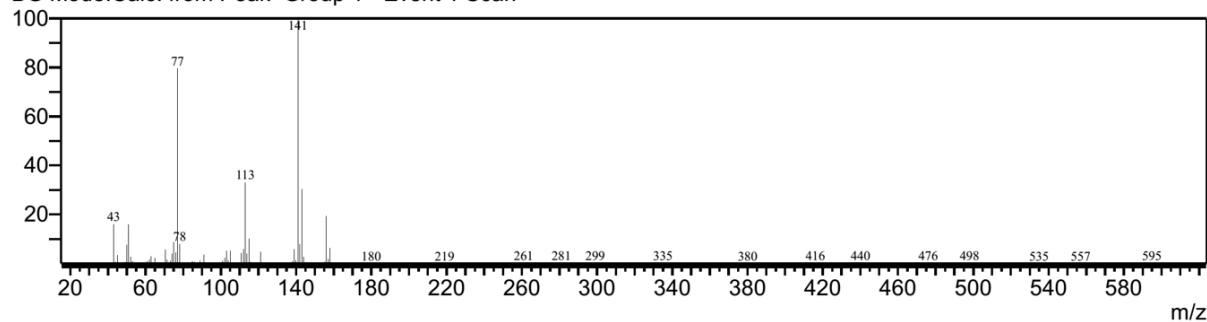

GCMS of 10f:

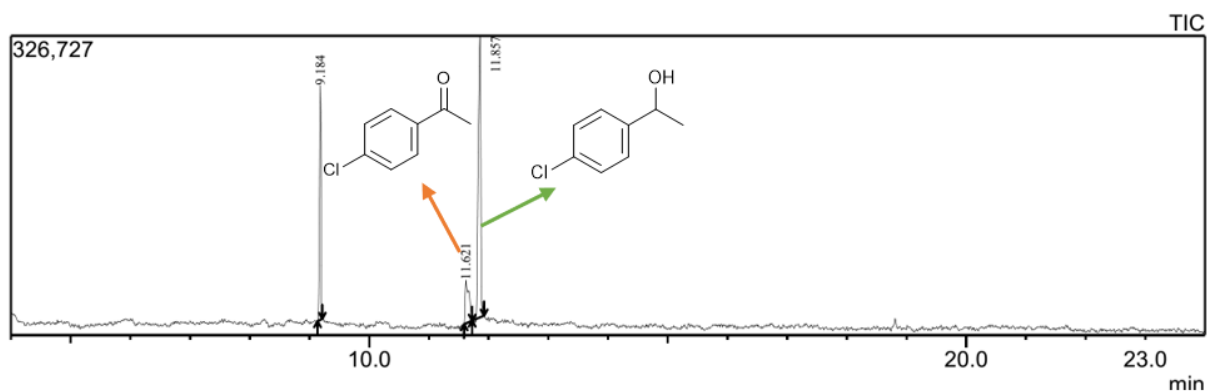

Peak Report TIC

| Peak# | R.Time | Area    | Area%  | Height | Height% | A/H  | Name                                      |
|-------|--------|---------|--------|--------|---------|------|-------------------------------------------|
| 1     | 9.184  | 450176  | 28.74  | 255757 | 41.95   | 1.76 | Decane                                    |
| 2     | 11.621 | 202067  | 12.90  | 46927  | 7.70    | 4.31 | Ethanone, 1-(4-chlorophenyl)-             |
| 3     | 11.857 | 914333  | 58.37  | 307002 | 50.35   | 2.98 | Benzenemethanol, 4-chloro-.alpha.-methyl- |
|       |        | 1566576 | 100.00 | 609686 | 100.00  |      |                                           |

Line#:2 R.Time:11.620(Scan#:1525)

MassPeaks:302

RawMode:Averaged 11.615-11.625(1524-1526) BasePeak:139(10336)

BG Mode:Calc. from Peak Group 1 - Event 1 Scan

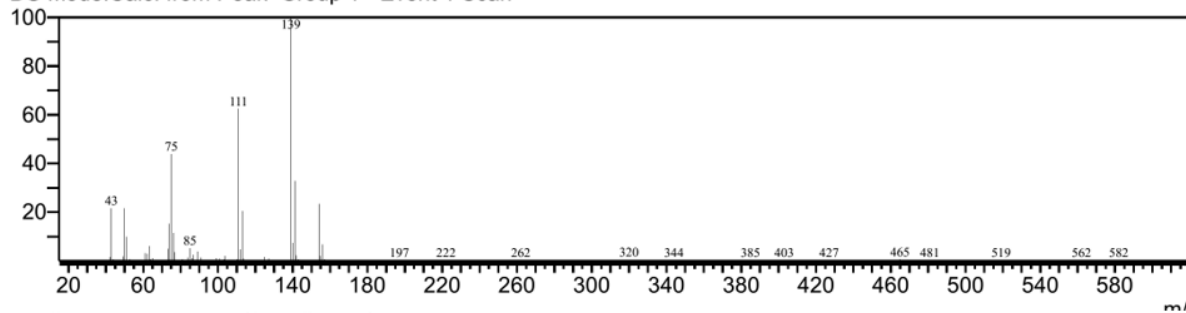

Line#:3 R.Time:11.855(Scan#:1572)

MassPeaks:356

RawMode:Averaged 11.850-11.860(1571-1573) BasePeak:141(55131)

BG Mode:Calc. from Peak Group 1 - Event 1 Scan

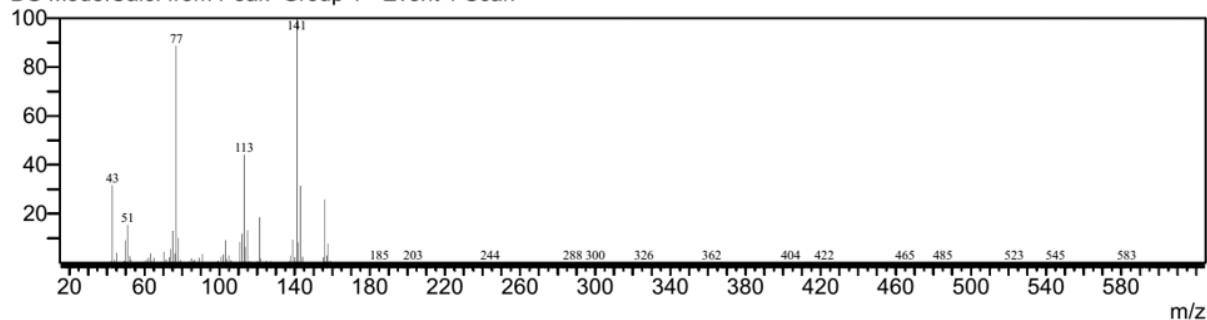

GCMS of 10g:

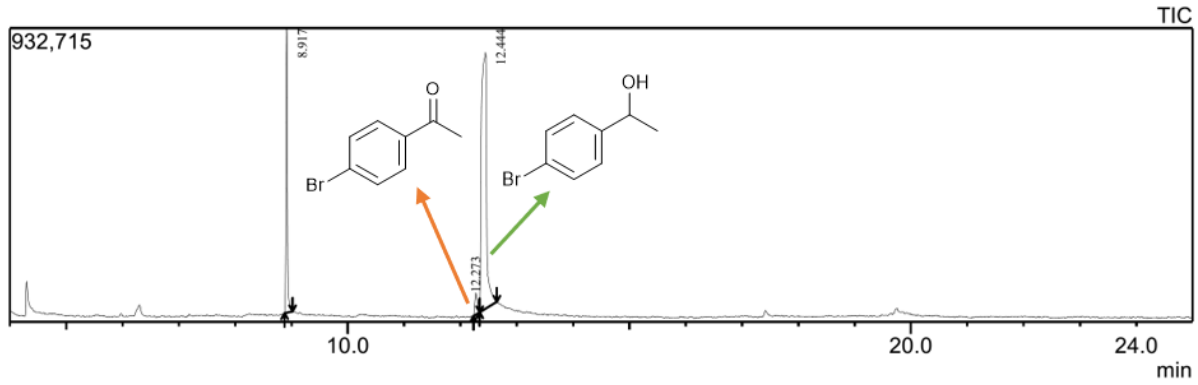

Peak Report TIC

| Peak# | R.Time | Area    | Area%  | Height  | Height% | A/H  | Name                                     |
|-------|--------|---------|--------|---------|---------|------|------------------------------------------|
| 1     | 8.917  | 1645828 | 23.08  | 902964  | 50.56   | 1.82 | Decane                                   |
| 2     | 12.273 | 236289  | 3.31   | 68410   | 3.83    | 3.45 | Ethanone, 1-(4-bromophenyl)-             |
| 3     | 12.444 | 5248181 | 73.60  | 814464  | 45.61   | 6.44 | Benzenemethanol, 4-bromo-.alpha.-methyl- |
|       |        | 7130298 | 100.00 | 1785838 | 100.00  |      |                                          |

Line#:2 R.Time:12.275(Scan#:1656)

MassPeaks:314

RawMode:Averaged 12.270-12.280(1655-1657) BasePeak:183(10806)

BG Mode:Calc. from Peak Group 1 - Event 1 Scan

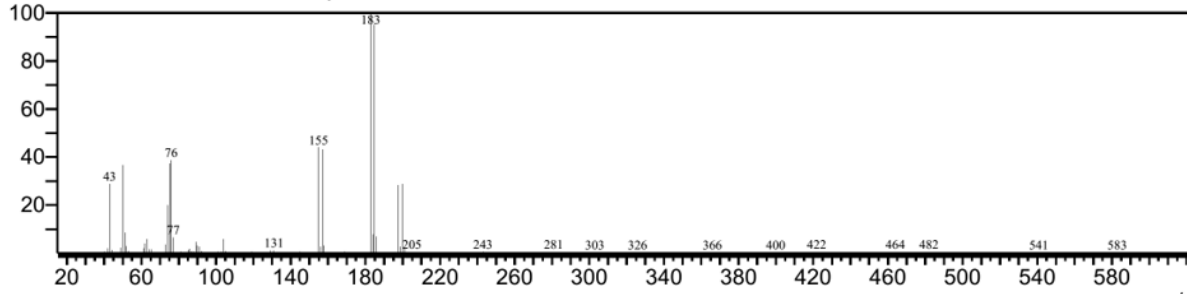

Line#:3 R.Time:12.445(Scan#:1690)

MassPeaks:339

RawMode:Averaged 12.440-12.450(1689-1691) BasePeak:77(108737)

BG Mode:Calc. from Peak Group 1 - Event 1 Scan

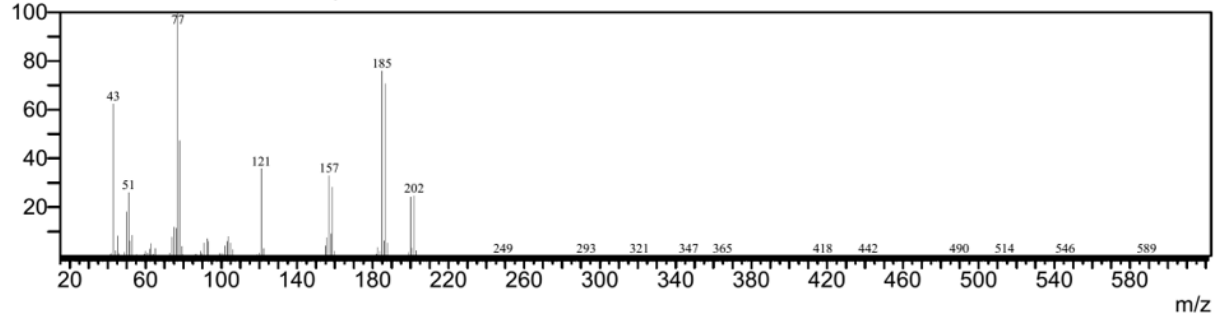

GCMS of 10h:

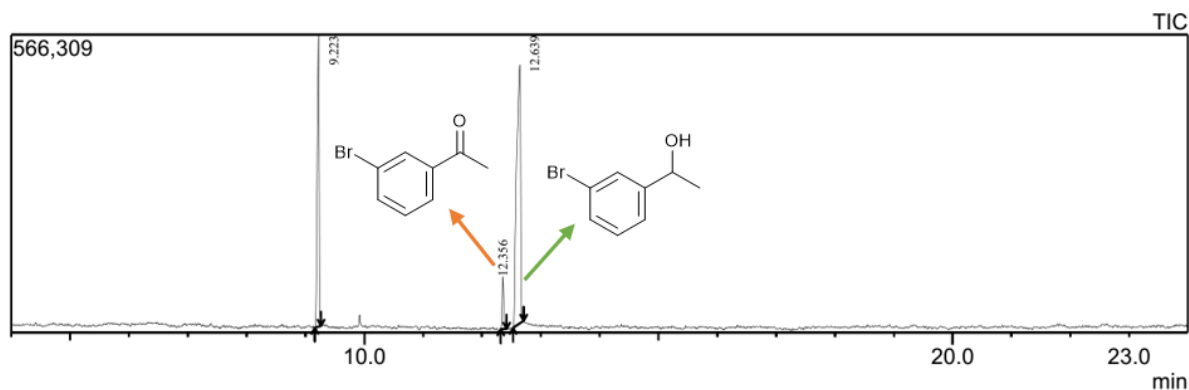

Peak Report TIC

| Peak# | R.Time | Area    | Area%  | Height  | Height% | A/H  | Name                                     |
|-------|--------|---------|--------|---------|---------|------|------------------------------------------|
| 1     | 9.223  | 1271397 | 34.14  | 554543  | 48.40   | 2.29 | Decane                                   |
| 2     | 12.356 | 180550  | 4.85   | 99268   | 8.66    | 1.82 | Ethanone, 1-(3-bromophenyl)-             |
| 3     | 12.639 | 2271655 | 61.01  | 491986  | 42.94   | 4.62 | Benzenemethanol, 3-bromo-.alpha.-methyl- |
|       |        | 3723602 | 100.00 | 1145797 | 100.00  |      |                                          |

Line#:2 R.Time:12.355(Scan#:1672)

MassPeaks:276

RawMode:Averaged 12.350-12.360(1671-1673) BasePeak:183(12986)

BG Mode:Calc. from Peak Group 1 - Event 1 Scan

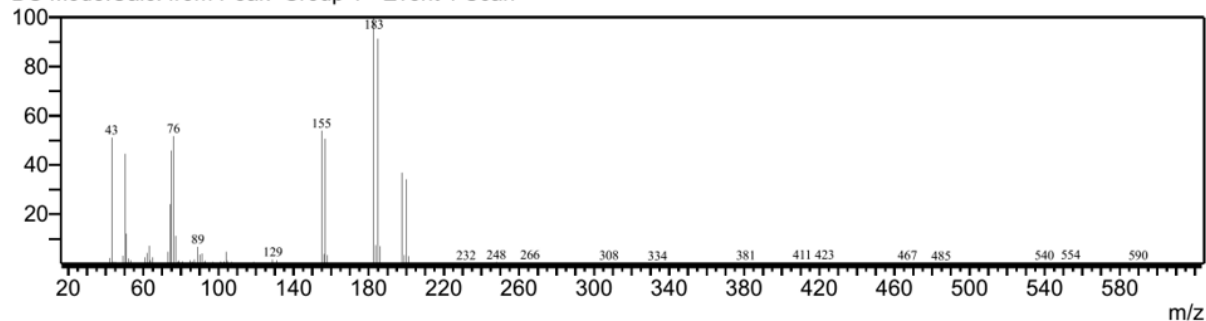

Line#:3 R.Time:12.640(Scan#:1729)

MassPeaks:318

RawMode:Averaged 12.635-12.645(1728-1730) BasePeak:77(69835)

BG Mode:Calc. from Peak Group 1 - Event 1 Scan

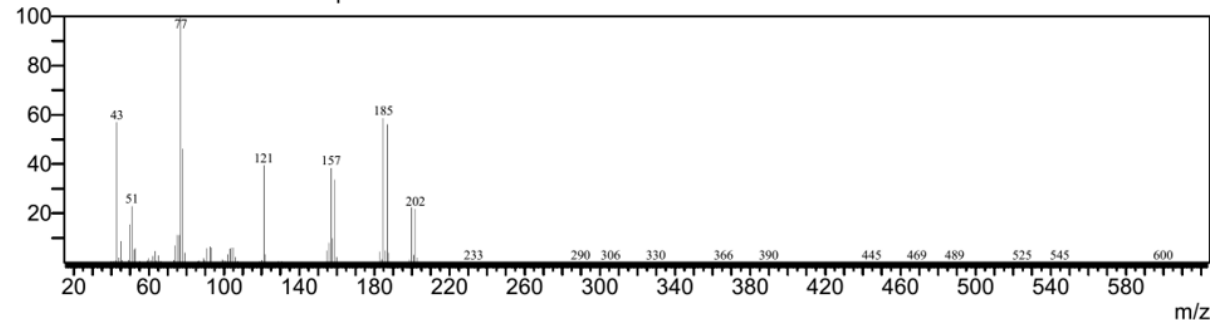

GCMS of 10i:

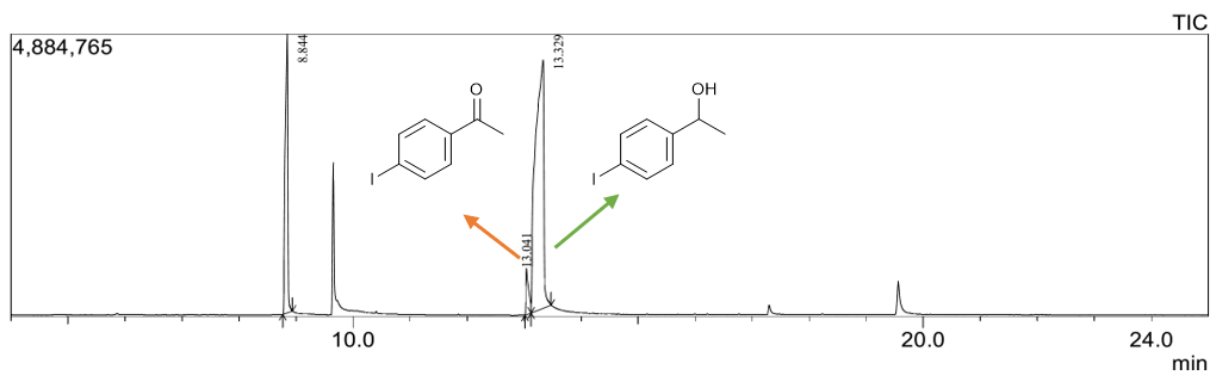

Peak Report TIC

| Peak# | R.Time | Area     | Area%  | Height  | Height% | A/H   | Name                    |
|-------|--------|----------|--------|---------|---------|-------|-------------------------|
| 1     | 8.844  | 4818297  | 24.45  | 4822120 | 48.61   | 3.07  | Decane                  |
| 2     | 13.041 | 2670156  | 4.41   | 798074  | 8.05    | 3.35  | 4-Iodoacetophenone      |
| 3     | 13.329 | 3105978  | 71.14  | 4298928 | 43.34   | 10.03 | 1-(4-Iodophenyl)ethanol |
|       |        | 50594431 | 100.00 | 9919122 | 100.00  |       |                         |

Line#:2 R.Time:13.040(Scan#:1809)

MassPeaks:262

RawMode:Averaged 13.035-13.045(1808-1810) BasePeak:231(210935)

BG Mode:Calc. from Peak Group 1 - Event 1 Scan

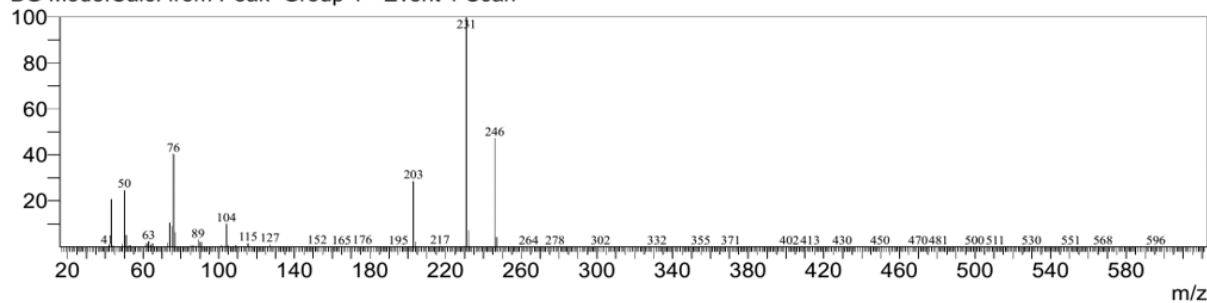

Line#:3 R.Time:13.330(Scan#:1867)

MassPeaks:333

RawMode:Averaged 13.325-13.335(1866-1868) BasePeak:78(853471)

BG Mode:Calc. from Peak Group 1 - Event 1 Scan

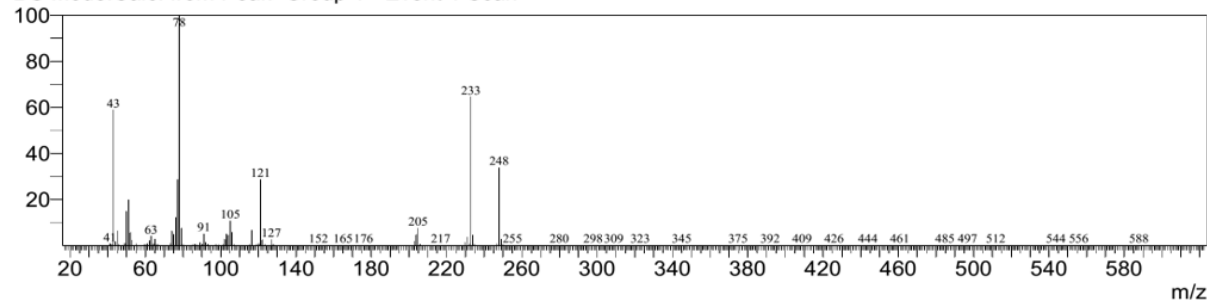

GCMS of 10j:

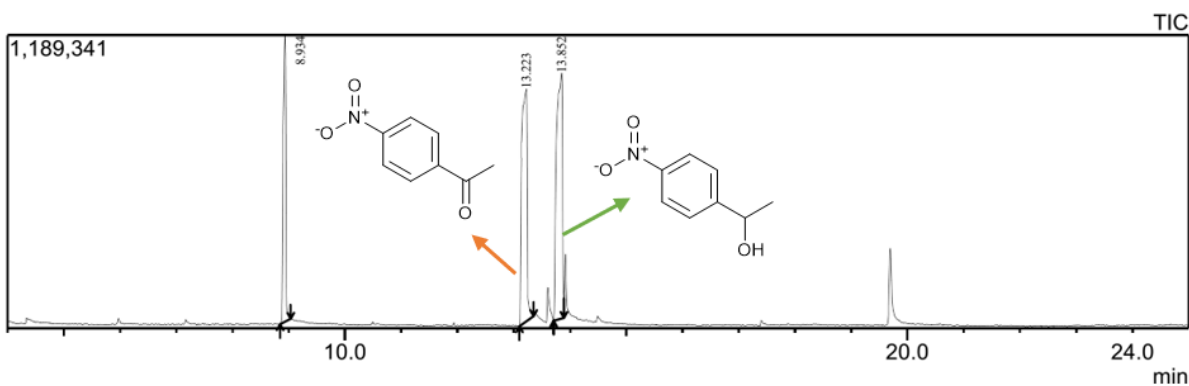

Peak Report TIC

| Peak# | R.Time | Area    | Area%  | Height  | Height% | A/H  | Name                                     |
|-------|--------|---------|--------|---------|---------|------|------------------------------------------|
| 1     | 8.934  | 3725900 | 21.66  | 1161557 | 37.47   | 3.21 | Decane                                   |
| 2     | 13.223 | 6277301 | 36.49  | 942090  | 30.39   | 6.66 | Acetophenone, 4'-nitro-                  |
| 3     | 13.852 | 7198799 | 41.85  | 996058  | 32.13   | 7.23 | Benzenemethanol, .alpha.-methyl-4-nitro- |
|       |        | 7202000 | 100.00 | 3099705 | 100.00  |      |                                          |

Line#:2 R.Time:13.225(Scan#:1846)

MassPeaks:368

RawMode:Averaged 13.220-13.230(1845-1847) BasePeak:150(301801)

BG Mode:Calc. from Peak Group 1 - Event 1 Scan

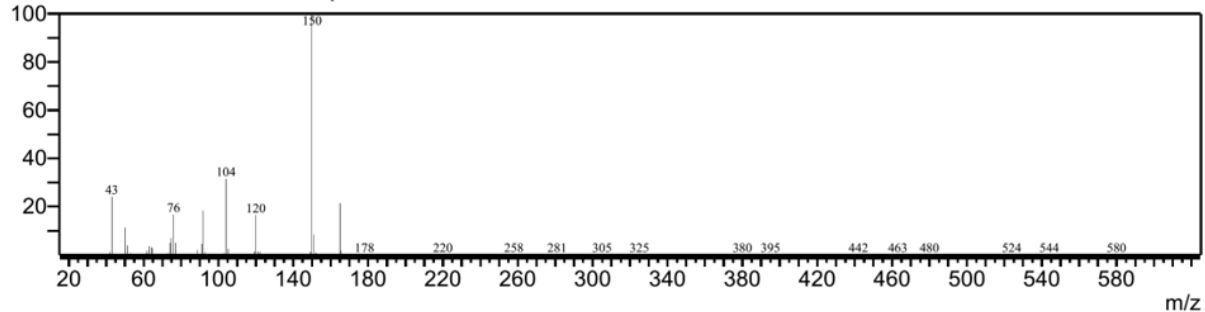

Line#:3 R.Time:13.605(Scan#:1922)

MassPeaks:311

RawMode:Averaged 13.600-13.610(1921-1923) BasePeak:120(42322)

BG Mode:Calc. from Peak Group 1 - Event 1 Scan

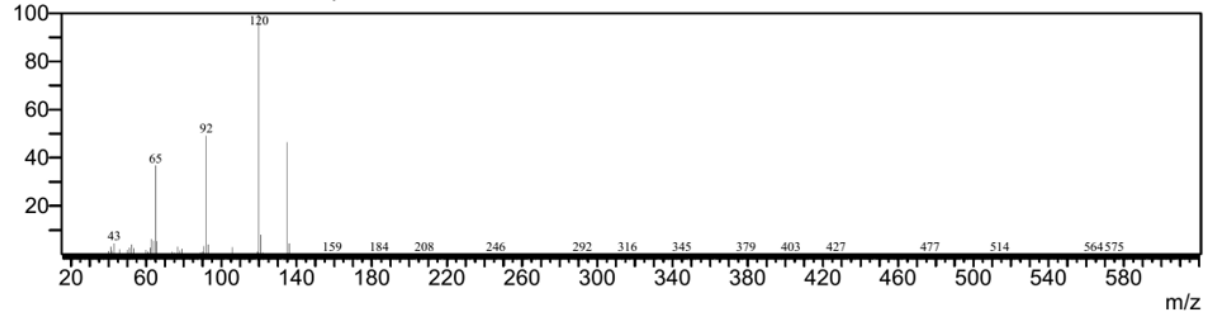

GCMS of 10k:

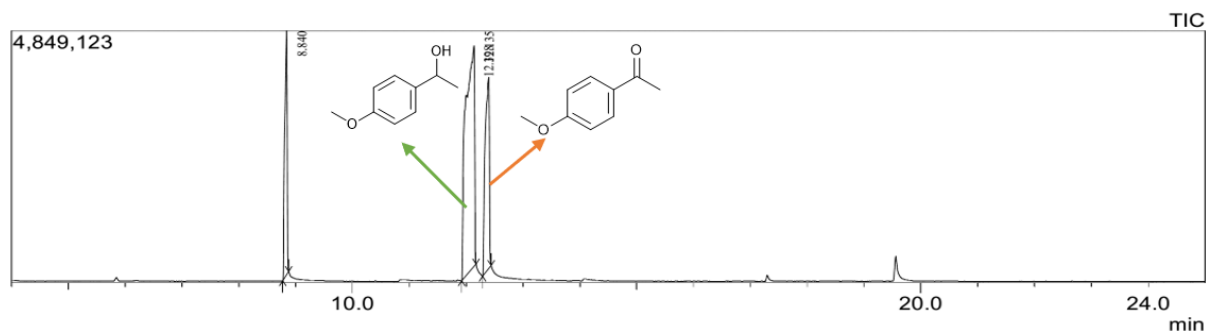

Peak Report TIC

| Peak# | R. Time | Area     | Area%  | Height   | Height% | A/H   | Name                            |
|-------|---------|----------|--------|----------|---------|-------|---------------------------------|
| 1     | 8.840   | 3683924  | 17.47  | 4688638  | 37.16   | 2.92  | Decane                          |
| 2     | 12.135  | 15605711 | 58.22  | 4250072  | 33.69   | 10.73 | 4-Methoxyphenyl methyl carbinol |
| 3     | 12.398  | 9045646  | 24.31  | 3677603  | 29.15   | 5.18  | 4-Acetylanisole                 |
|       |         | 8335281  | 100.00 | 12616313 | 100.00  |       |                                 |

Line#:2 R. Time:12.135(Scan#:1628)

MassPeaks:328

RawMode:Averaged 12.130-12.140(1627-1629) BasePeak:137(983441)

BG Mode:Calc. from Peak Group 1 - Event 1 Scan

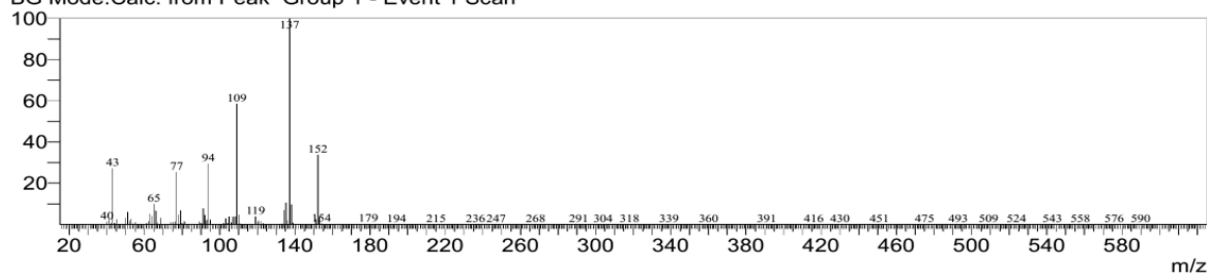

Line#:3 R. Time:12.400(Scan#:1681)

MassPeaks:368

RawMode:Averaged 12.395-12.405(1680-1682) BasePeak:135(1235981)

BG Mode:Calc. from Peak Group 1 - Event 1 Scan

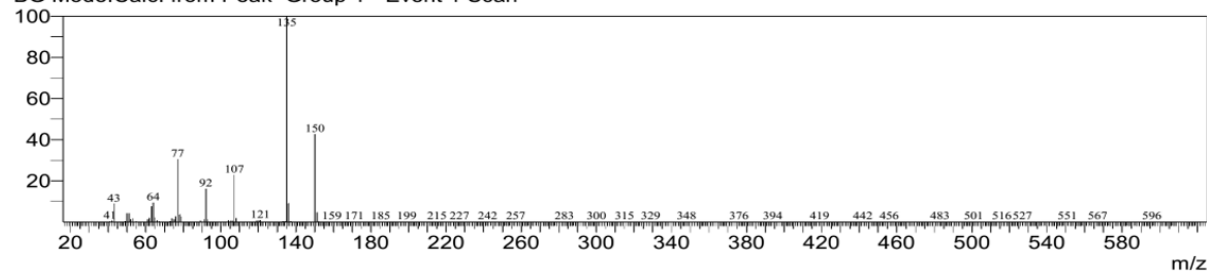



GCMS of 10I:

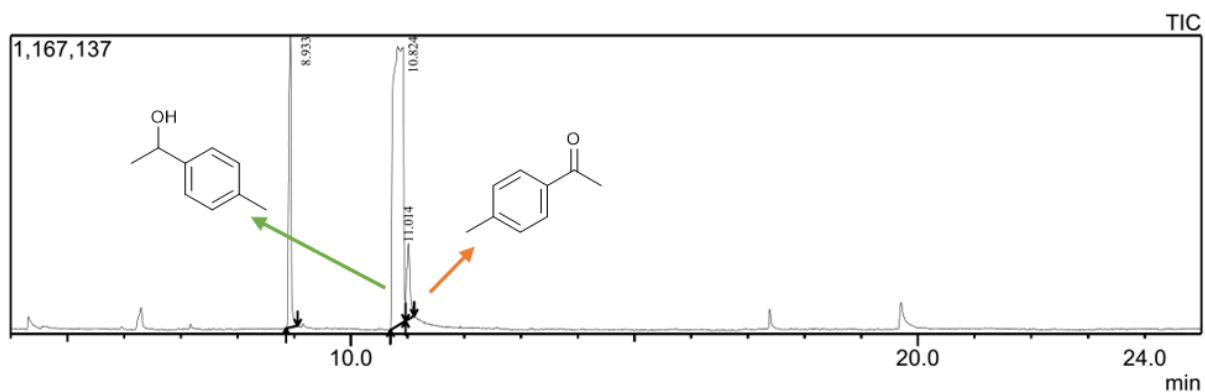

Peak Report TIC

| Peak# | R.Time | Area    | Area%  | Height  | Height% | A/H   | Name                                 |
|-------|--------|---------|--------|---------|---------|-------|--------------------------------------|
| 1     | 8.933  | 3524894 | 19.32  | 1140626 | 45.07   | 3.09  | Decane                               |
| 2     | 10.824 | 3578554 | 74.42  | 1092911 | 43.18   | 12.42 | Benzenemethanol, .alpha.,4-dimethyl- |
| 3     | 11.014 | 1143115 | 6.26   | 297514  | 11.75   | 3.84  | Ethanone, 1-(4-methylphenyl)-        |
|       |        | 8246563 | 100.00 | 2531051 | 100.00  |       |                                      |

Line#:2 R.Time:10.825(Scan#:1366)  
 MassPeaks:333  
 RawMode:Averaged 10.820-10.830(1365-1367) BasePeak:121(213147)  
 BG Mode:Calc. from Peak Group 1 - Event 1 Scan

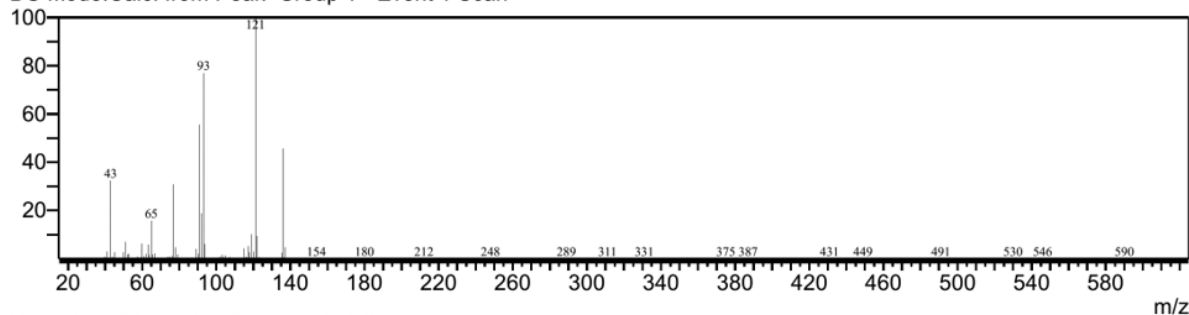

Line#:3 R.Time:11.015(Scan#:1404)  
 MassPeaks:292  
 RawMode:Averaged 11.010-11.020(1403-1405) BasePeak:119(80645)  
 BG Mode:Calc. from Peak Group 1 - Event 1 Scan

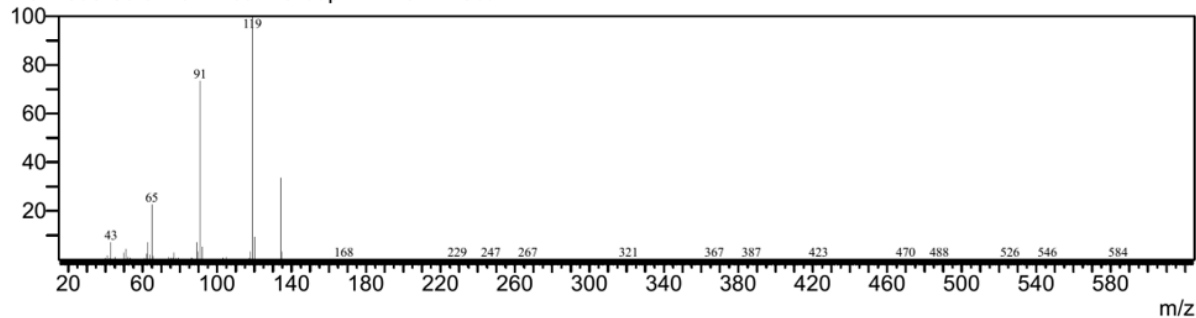

GCMS of 10m:

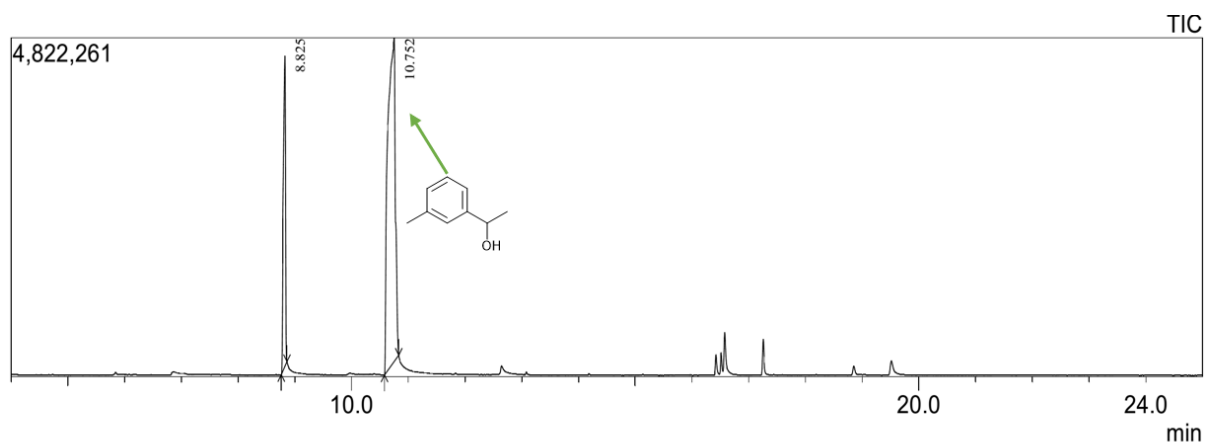

Peak Report TIC

| Peak# | R.Time | Area     | Area%  | Height  | Height% | A/H  | Name                    |
|-------|--------|----------|--------|---------|---------|------|-------------------------|
| 1     | 8.825  | 11842112 | 21.60  | 4412839 | 48.95   | 2.68 | Decane                  |
| 2     | 10.752 | 2990866  | 78.40  | 4602288 | 51.05   | 9.34 | Methyl m-tolyl carbinol |
|       |        | 4832978  | 100.00 | 9015127 | 100.00  |      |                         |

Line#:2 R.Time:10.750(Scan#:1351)

MassPeaks:308

RawMode:Averaged 10.745-10.755(1350-1352) BasePeak:93(867682)

BG Mode:Calc. from Peak Group 1 - Event 1 Scan

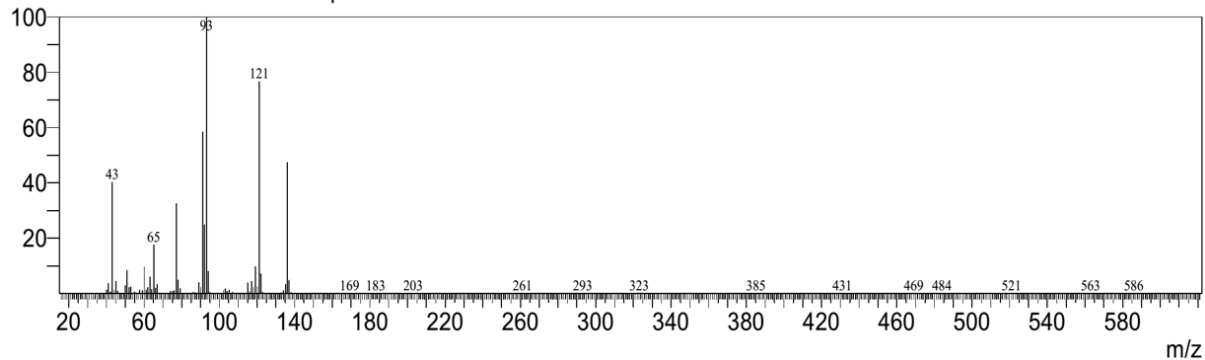

GCMS of 10n:

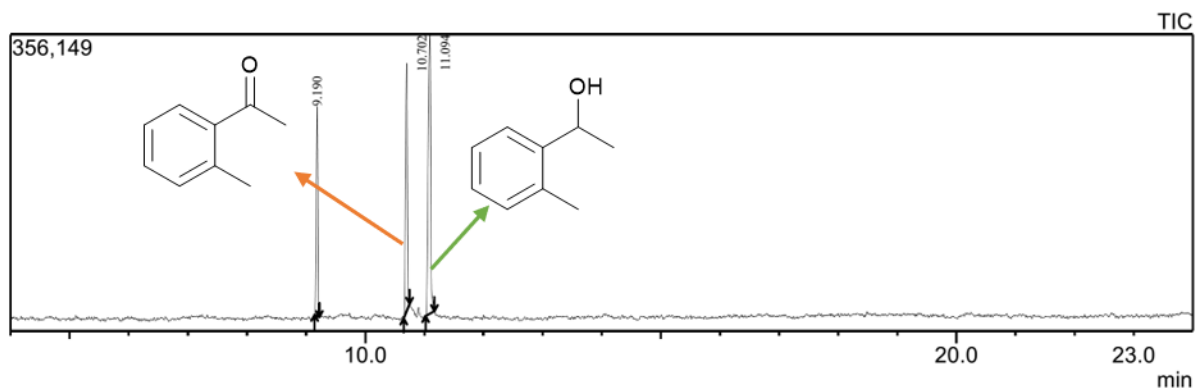

Peak Report TIC

| Peak# | R.Time | Area    | Area%  | Height | Height% | A/H  | Name                          |
|-------|--------|---------|--------|--------|---------|------|-------------------------------|
| 1     | 9.190  | 433946  | 21.11  | 251494 | 28.47   | 1.73 | Decane                        |
| 2     | 10.702 | 638430  | 31.06  | 296795 | 33.60   | 2.15 | Ethanone, 1-(2-methylphenyl)- |
| 3     | 11.094 | 983100  | 47.83  | 335002 | 37.93   | 2.93 | 1-(2-Methylphenyl)ethanol     |
|       |        | 2055476 | 100.00 | 883291 | 100.00  |      |                               |

Line#:2 R.Time:10.700(Scan#:1341)

MassPeaks:327

RawMode:Averaged 10.695-10.705(1340-1342) BasePeak:119(84883)

BG Mode:Calc. from Peak Group 1 - Event 1 Scan

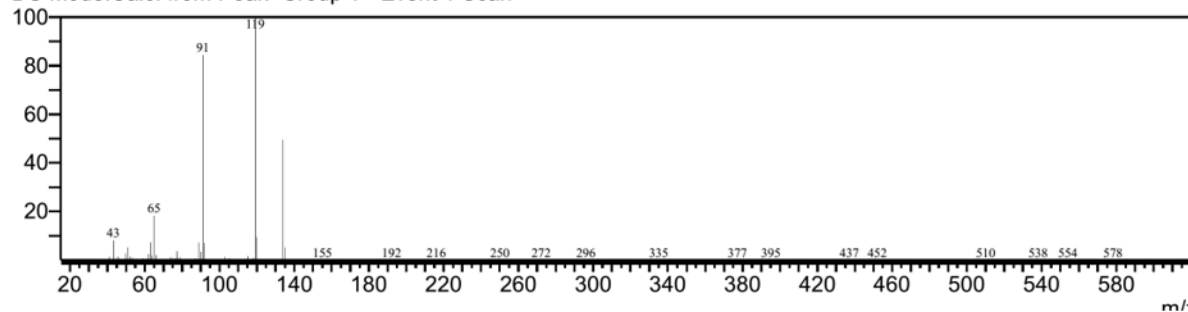

Line#:3 R.Time:11.095(Scan#:1420)

MassPeaks:322

RawMode:Averaged 11.090-11.100(1419-1421) BasePeak:93(49715)

BG Mode:Calc. from Peak Group 1 - Event 1 Scan

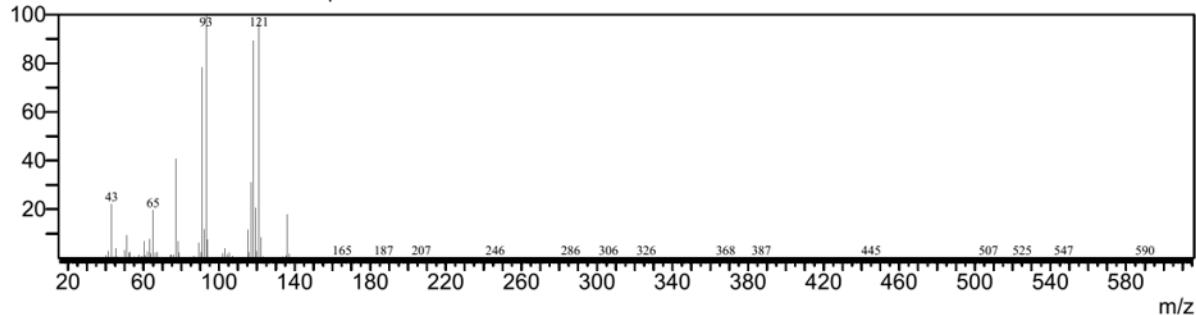

GCMS of 10o:

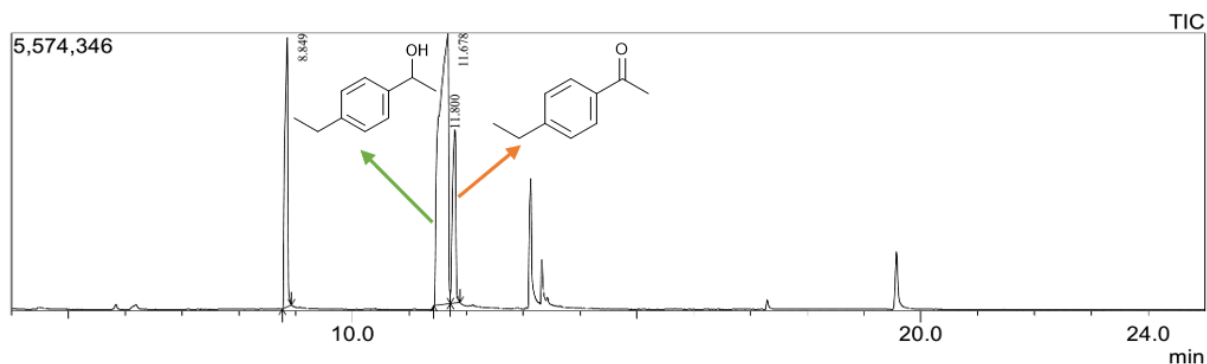

Peak Report TIC

| Peak# | R.Time | Area    | Area%  | Height   | Height% | A/H   | Name                         |
|-------|--------|---------|--------|----------|---------|-------|------------------------------|
| 1     | 8.849  | 8565526 | 19.83  | 5400161  | 37.74   | 3.44  | Decane                       |
| 2     | 11.678 | 1433914 | 65.61  | 5427417  | 37.94   | 11.32 | 1-(4-Ethylphenyl)ethanol     |
| 3     | 11.800 | 3638239 | 14.56  | 3479529  | 24.32   | 3.92  | Ethanone, 1-(4-ethylphenyl)- |
|       |        | 3637679 | 100.00 | 14307107 | 100.00  |       |                              |

Line#:2 R.Time:11.675(Scan#:1536)

MassPeaks:315

RawMode:Averaged 11.670-11.680(1535-1537) BasePeak:79(1091526)

BG Mode:Calc. from Peak Group 1 - Event 1 Scan

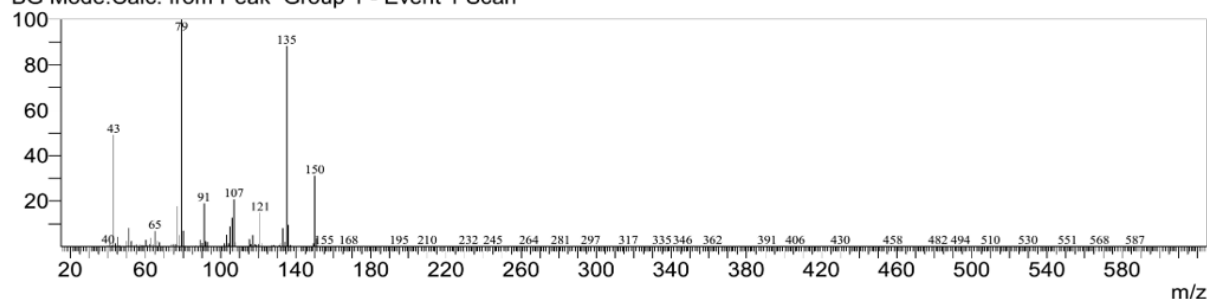

Line#:3 R.Time:11.800(Scan#:1561)

MassPeaks:301

RawMode:Averaged 11.795-11.805(1560-1562) BasePeak:133(1225060)

BG Mode:Calc. from Peak Group 1 - Event 1 Scan

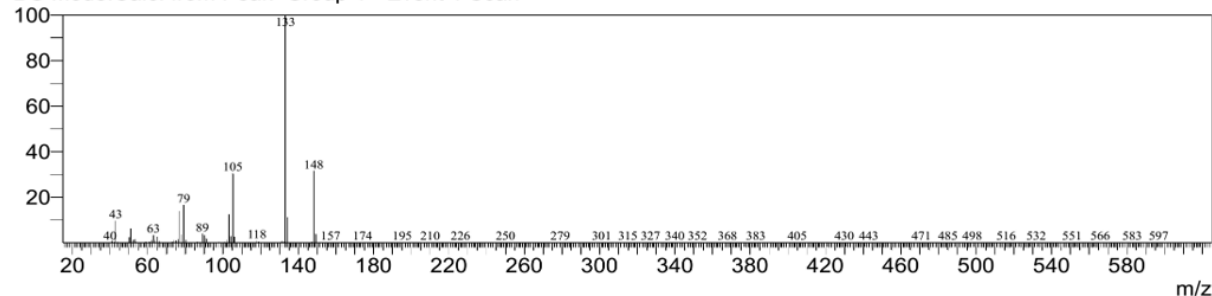

GCMS of 10p:

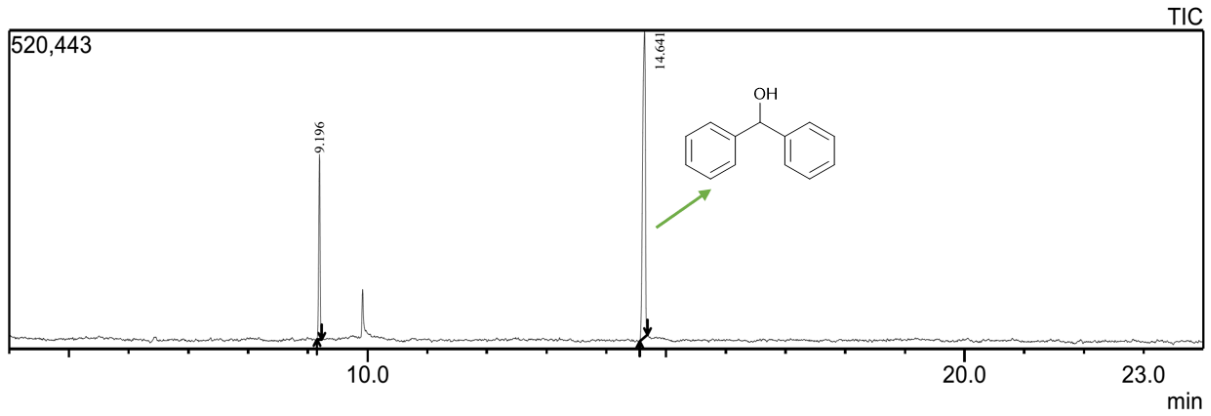

Peak Report TIC

| Peak# | R.Time | Area    | Area%  | Height | Height% | A/H  | Name                             |
|-------|--------|---------|--------|--------|---------|------|----------------------------------|
| 1     | 9.196  | 484710  | 23.26  | 302391 | 37.64   | 1.60 | Decane                           |
| 2     | 14.641 | 1598936 | 76.74  | 500968 | 62.36   | 3.19 | Benzenemethanol, .alpha.-phenyl- |
|       |        | 2083646 | 100.00 | 803359 | 100.00  |      |                                  |

Line#:2 R.Time:14.640(Scan#:2129)

MassPeaks:321

RawMode:Averaged 14.635-14.645(2128-2130) BasePeak:105(132155)

BG Mode:Calc. from Peak Group 1 - Event 1 Scan

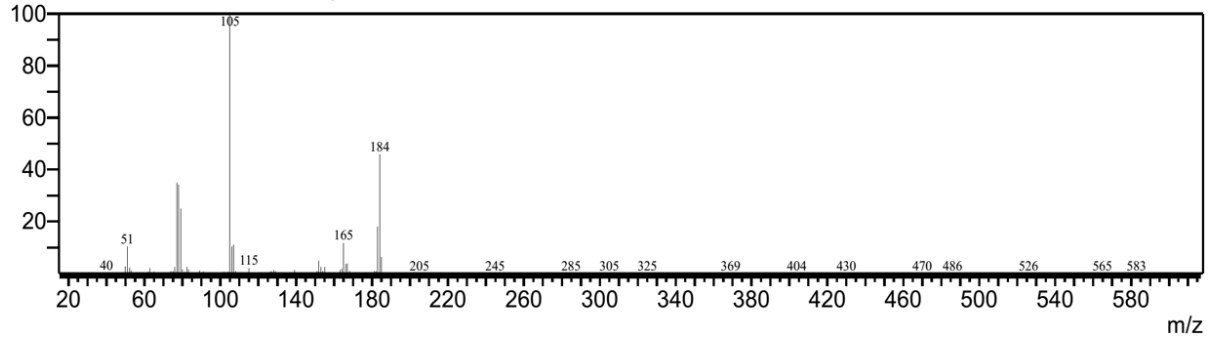

GCMS of 10q:

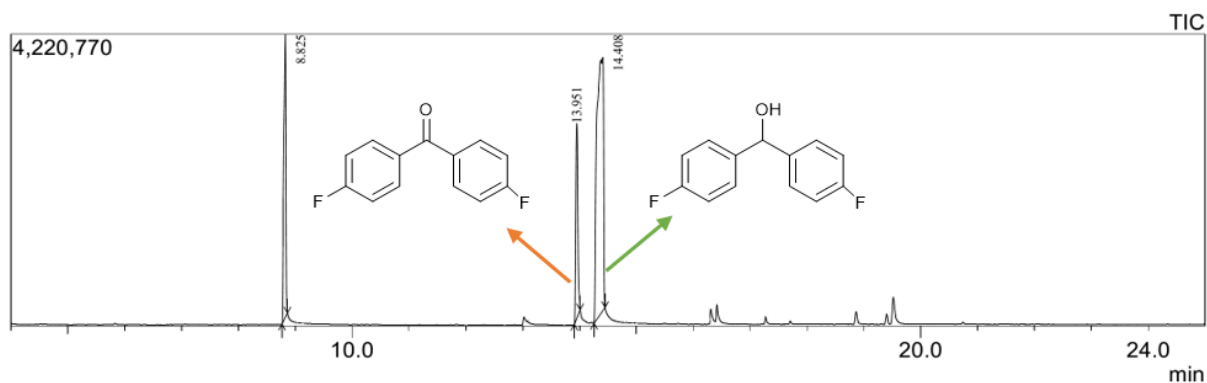

Peak Report TIC

| Peak# | R.Time | Area    | Area%  | Height   | Height% | A/H  | Name                      |
|-------|--------|---------|--------|----------|---------|------|---------------------------|
| 1     | 8.825  | 0224904 | 21.72  | 4090041  | 38.67   | 2.50 | Decane                    |
| 2     | 13.951 | 6964676 | 14.79  | 2817559  | 26.64   | 2.47 | 4,4'-Difluorobenzophenone |
| 3     | 14.408 | 9890593 | 63.49  | 3668330  | 34.69   | 8.15 | 4,4'-Difluorobenzhydrol   |
|       |        | 7080173 | 100.00 | 10575930 | 100.00  |      |                           |

Line#:2 R.Time:13.950(Scan#:1991)

MassPeaks:333

RawMode:Averaged 13.945-13.955(1990-1992) BasePeak:123(1049401)

BG Mode:Calc. from Peak Group 1 - Event 1 Scan

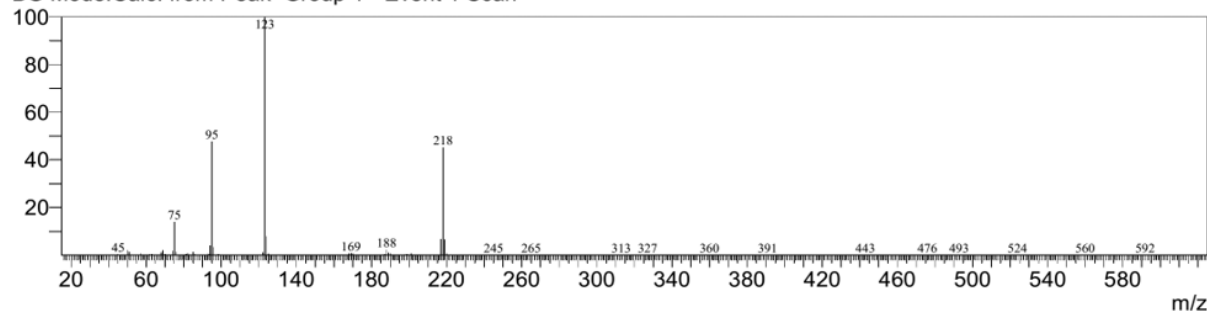

Line#:3 R.Time:14.410(Scan#:2083)

MassPeaks:365

RawMode:Averaged 14.405-14.415(2082-2084) BasePeak:123(1184735)

BG Mode:Calc. from Peak Group 1 - Event 1 Scan

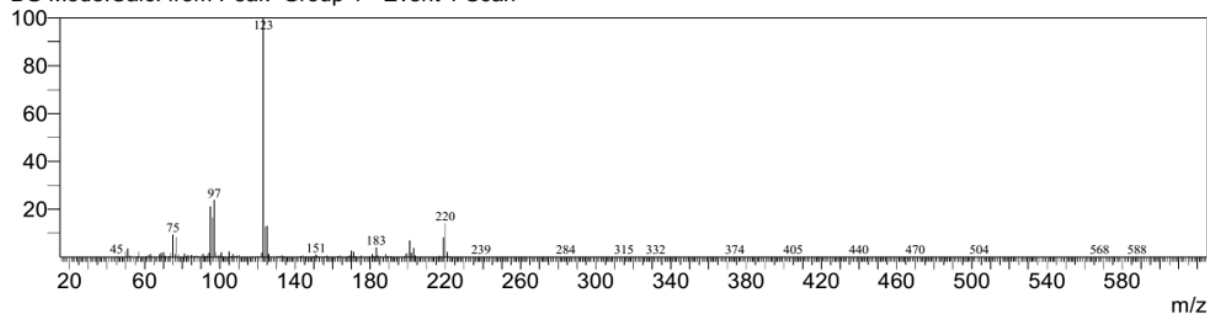

GCMS of 10r:

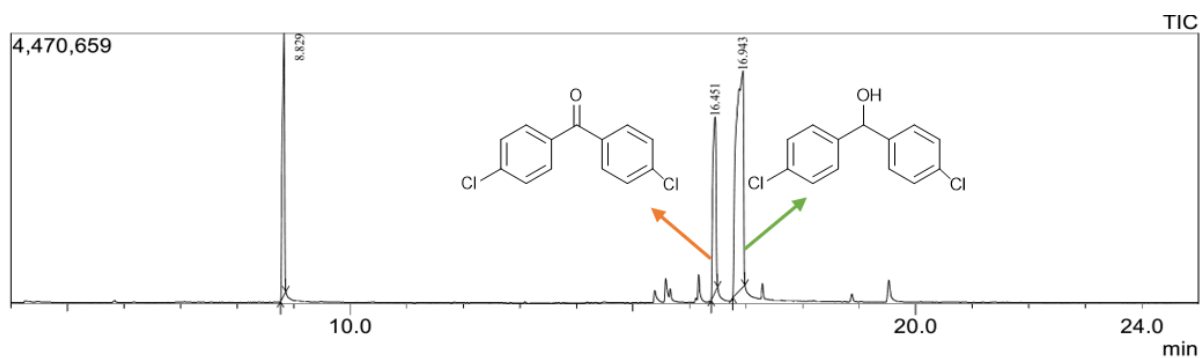

Peak Report TIC

| Peak# | R.Time | Area     | Area%  | Height   | Height% | A/H  | Name                      |
|-------|--------|----------|--------|----------|---------|------|---------------------------|
| 1     | 8.829  | 11896835 | 21.03  | 4320982  | 40.08   | 2.75 | Decane                    |
| 2     | 16.451 | 11495818 | 20.32  | 2888627  | 26.79   | 3.98 | 4,4'-Dichlorobenzophenone |
| 3     | 16.943 | 33178386 | 58.65  | 3571120  | 33.13   | 9.29 | 4,4'-Dichlorobenzhydrol   |
|       |        | 56571039 | 100.00 | 10780729 | 100.00  |      |                           |

Line#:2 R.Time:16.450(Scan#:2491)  
 MassPeaks:325  
 RawMode:Averaged 16.445-16.455(2490-2492) BasePeak:139(819090)  
 BG Mode:Calc. from Peak Group 1 - Event 1 Scan

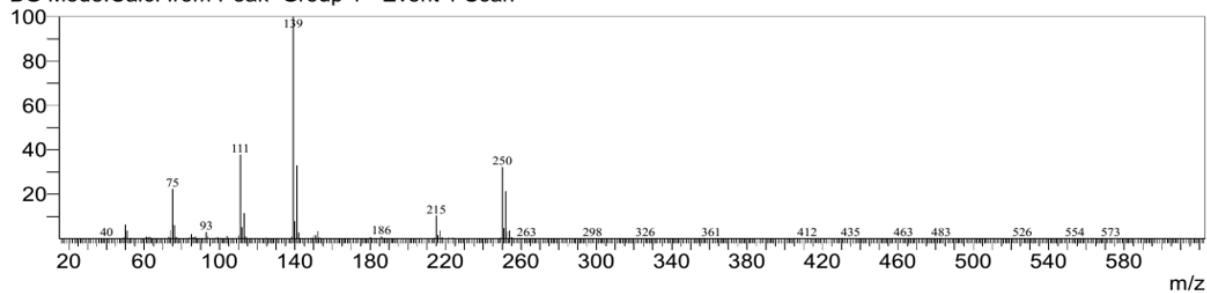

Line#:3 R.Time:16.945(Scan#:2590)  
 MassPeaks:338  
 RawMode:Averaged 16.940-16.950(2589-2591) BasePeak:139(869259)  
 BG Mode:Calc. from Peak Group 1 - Event 1 Scan

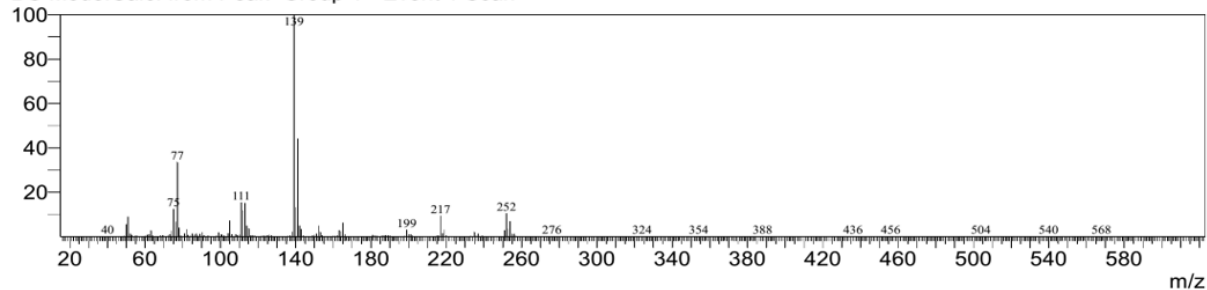

GCMS of 10s:

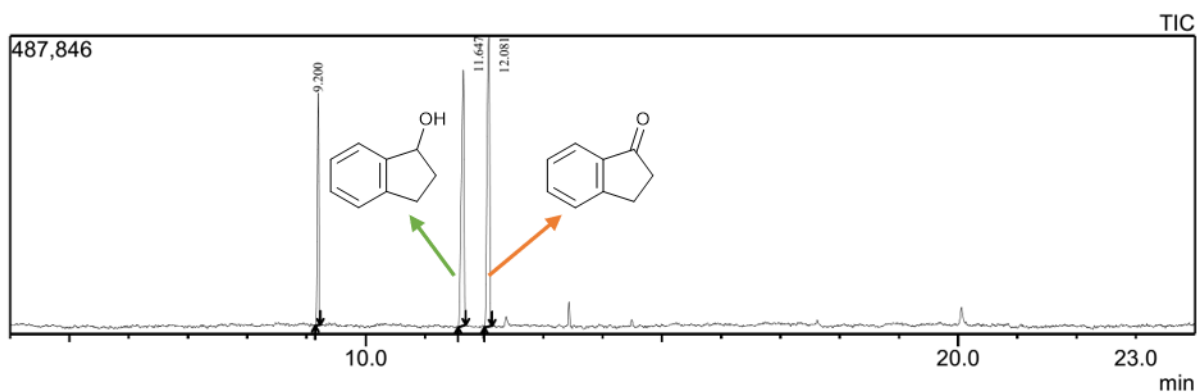

Peak Report TIC

| Peak# | R.Time | Area    | Area%  | Height  | Height% | A/H  | Name                         |
|-------|--------|---------|--------|---------|---------|------|------------------------------|
| 1     | 9.200  | 658630  | 19.11  | 380097  | 29.85   | 1.73 | Decane                       |
| 2     | 11.647 | 1309310 | 37.98  | 418378  | 32.85   | 3.13 | 1H-Inden-1-ol, 2,3-dihydro-  |
| 3     | 12.081 | 1479430 | 42.91  | 475043  | 37.30   | 3.11 | 1H-Inden-1-one, 2,3-dihydro- |
|       |        | 3447370 | 100.00 | 1273518 | 100.00  |      |                              |

Line#:2 R.Time:11.645(Scan#:1530)  
 MassPeaks:312  
 RawMode:Averaged 11.640-11.650(1529-1531) BasePeak:133(116651)  
 BG Mode:Calc. from Peak Group 1 - Event 1 Scan

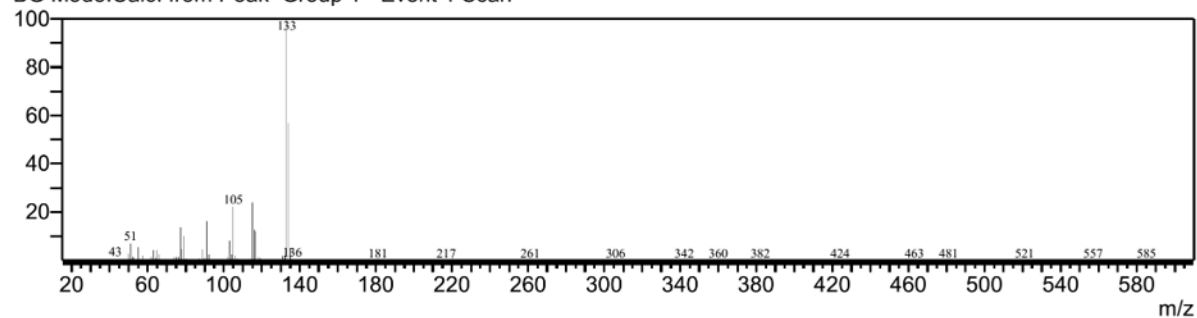

Line#:3 R.Time:12.080(Scan#:1617)  
 MassPeaks:311  
 RawMode:Averaged 12.075-12.085(1616-1618) BasePeak:132(112641)  
 BG Mode:Calc. from Peak Group 1 - Event 1 Scan

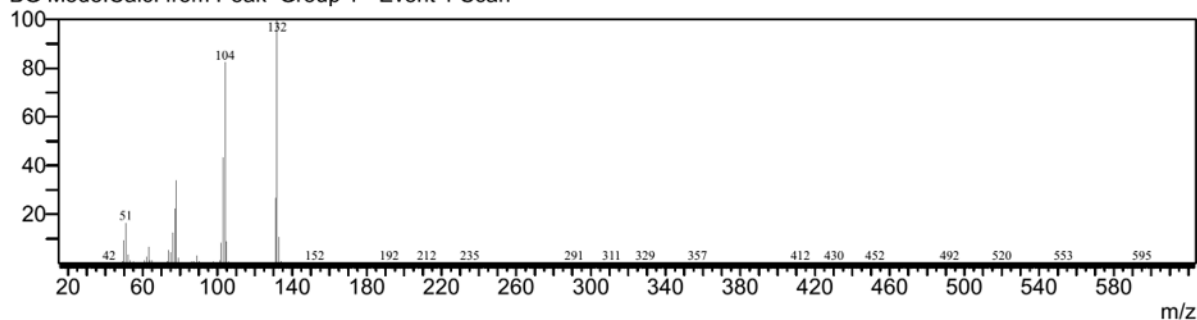



GCMS of 10t:

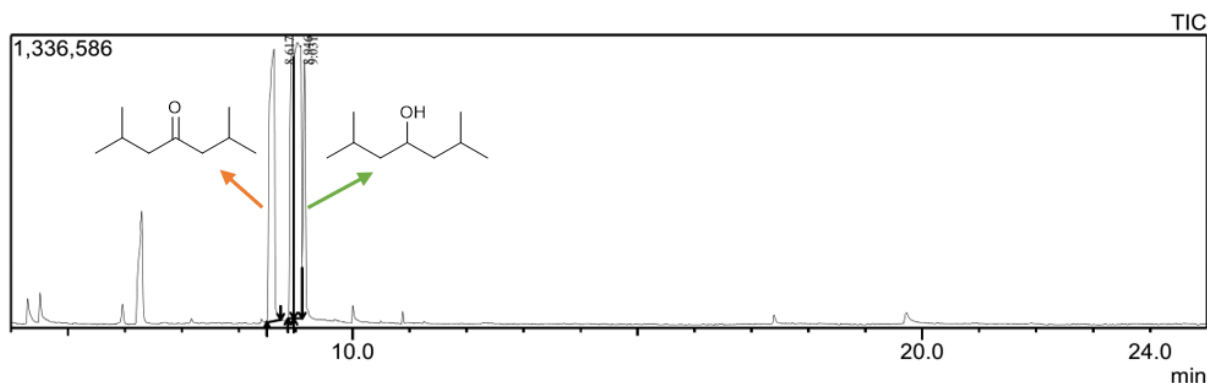

Peak Report TIC

| Peak# | R.Time | Area    | Area%  | Height  | Height% | A/H  | Name                       |
|-------|--------|---------|--------|---------|---------|------|----------------------------|
| 1     | 8.617  | 7854953 | 33.88  | 1241242 | 32.72   | 6.33 | 4-Heptanone, 2,6-dimethyl- |
| 2     | 8.946  | 5300755 | 22.86  | 1293425 | 34.10   | 4.10 | Decane                     |
| 3     | 9.031  | 0028247 | 43.26  | 1258771 | 33.18   | 7.97 | 4-Heptanol, 2,6-dimethyl-  |
|       |        | 3183955 | 100.00 | 3793438 | 100.00  |      |                            |

Line#:1 R.Time:8.615(Scan#:924)

MassPeaks:255

RawMode:Averaged 8.610-8.620(923-925) BasePeak:57(359050)

BG Mode:Calc. from Peak Group 1 - Event 1 Scan

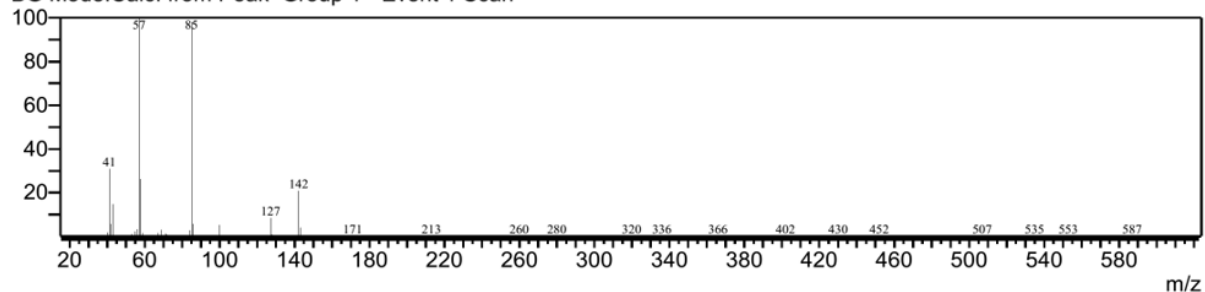

Line#:3 R.Time:9.030(Scan#:1007)

MassPeaks:313

RawMode:Averaged 9.025-9.035(1006-1008) BasePeak:69(176254)

BG Mode:Calc. from Peak Group 1 - Event 1 Scan

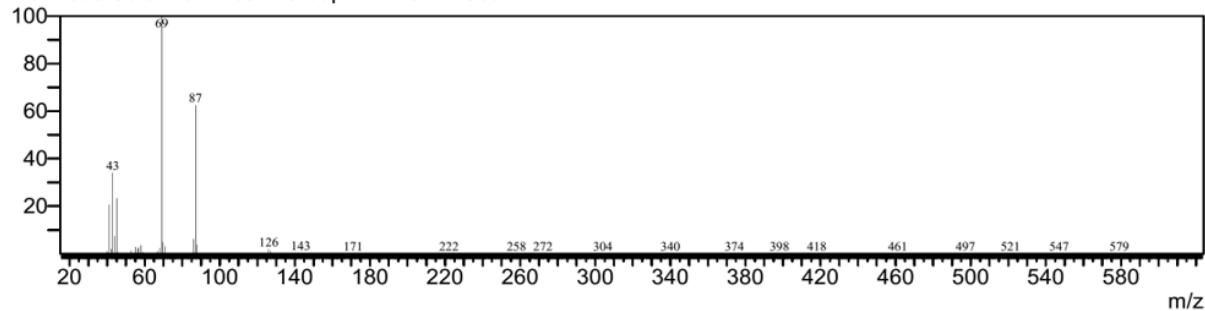

GCMS of 10u:

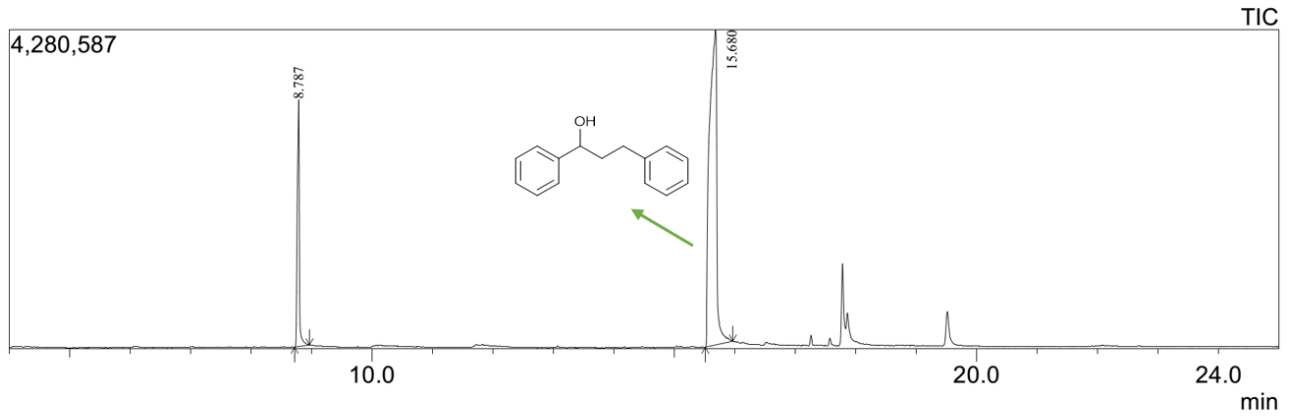

Peak Report TIC

| Peak# | R.Time | Area     | Area%  | Height  | Height% | A/H  | Name                    |
|-------|--------|----------|--------|---------|---------|------|-------------------------|
| 1     | 8.787  | 8434009  | 19.17  | 3313490 | 43.93   | 2.55 | Decane                  |
| 2     | 15.680 | 35568871 | 80.83  | 4228742 | 56.07   | 8.41 | 1,3 Diphenylpropan-1-ol |
|       |        | 4002880  | 100.00 | 7542232 | 100.00  |      |                         |

Line#:2 R.Time:15.680(Scan#:2337)

MassPeaks:308

RawMode:Averaged 15.675-15.685(2336-2338) BasePeak:107(860431)

BG Mode:Calc. from Peak Group 1 - Event 1 Scan

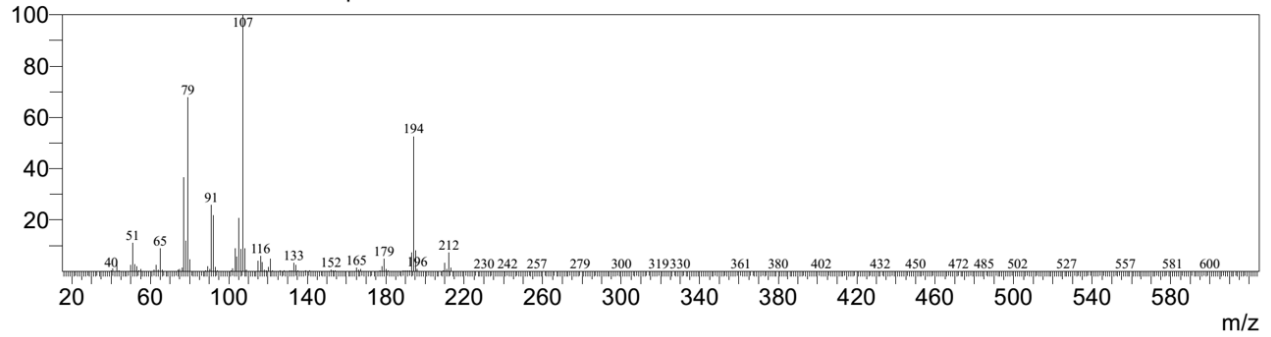

## GCMS of Control experiments

Transfer hydrogenation of cyclohexanone with 1 using CuI

Entry 1

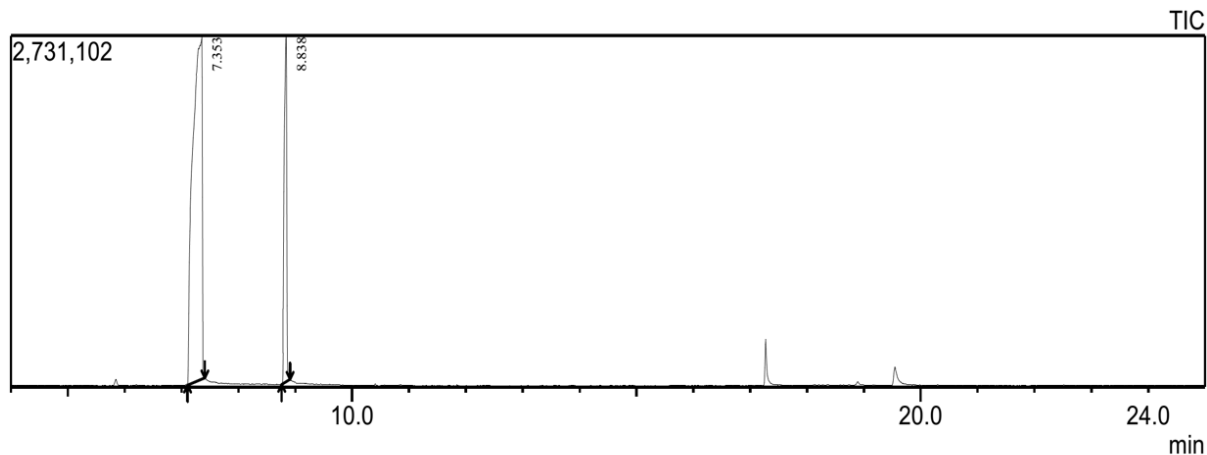

Peak Report TIC

| Peak# | R.Time | Area     | Area%  | Height  | Height% | A/H   | Name         |
|-------|--------|----------|--------|---------|---------|-------|--------------|
| 1     | 7.353  | 10404150 | 79.00  | 2657481 | 49.72   | 11.44 | Cyclohexanol |
| 2     | 8.838  | 8081406  | 21.00  | 2687791 | 50.28   | 3.01  | Decane       |
|       |        | 8485556  | 100.00 | 5345272 | 100.00  |       |              |

Line#:1 R.Time:7.355(Scan#:672)

MassPeaks:307

RawMode:Averaged 7.350-7.360(671-673) BasePeak:57(683424)

BG Mode:Calc. from Peak Group 1 - Event 1 Scan

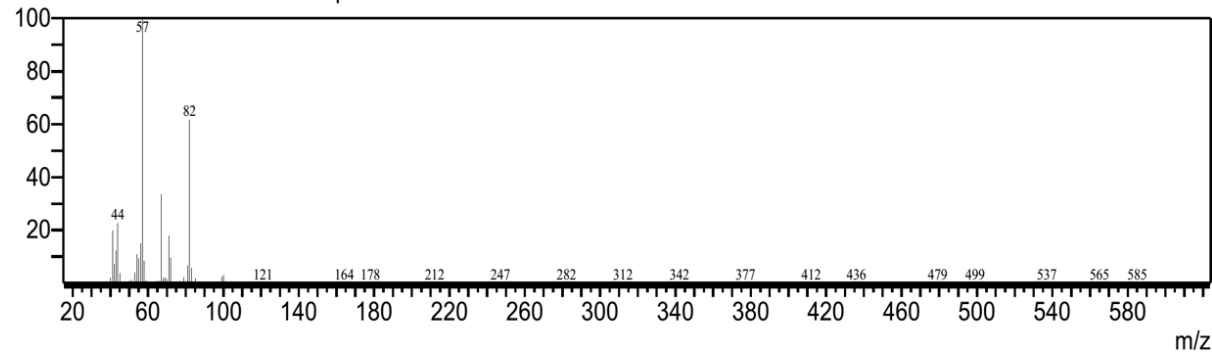

Entry 2

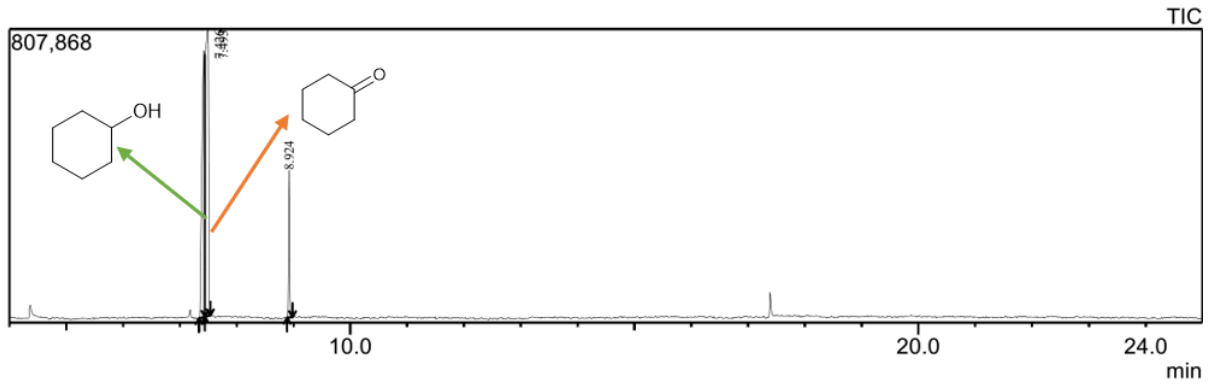

Peak Report TIC

| Peak# | R.Time | Area    | Area%  | Height  | Height% | A/H  | Name          |
|-------|--------|---------|--------|---------|---------|------|---------------|
| 1     | 7.426  | 2696109 | 42.26  | 733657  | 38.08   | 3.67 | Cyclohexanol  |
| 2     | 7.493  | 3173703 | 49.74  | 789131  | 40.95   | 4.02 | Cyclohexanone |
| 3     | 8.924  | 510658  | 8.00   | 404077  | 20.97   | 1.26 | Decane        |
|       |        | 6380470 | 100.00 | 1926865 | 100.00  |      |               |

Line#:1 R.Time:7.425(Scan#:686)

MassPeaks:321

RawMode:Averaged 7.420-7.430(685-687) BasePeak:57(40843)

BG Mode:Calc. from Peak Group 1 - Event 1 Scan

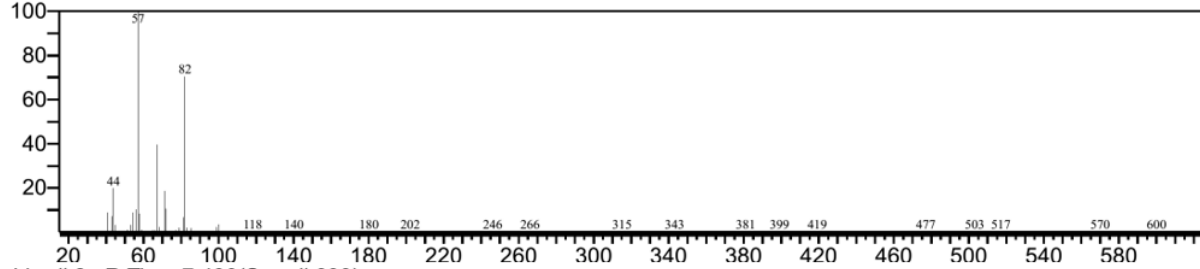

Line#:2 R.Time:7.490(Scan#:699)

MassPeaks:309

RawMode:Averaged 7.485-7.495(698-700) BasePeak:55(110480)

BG Mode:Calc. from Peak Group 1 - Event 1 Scan

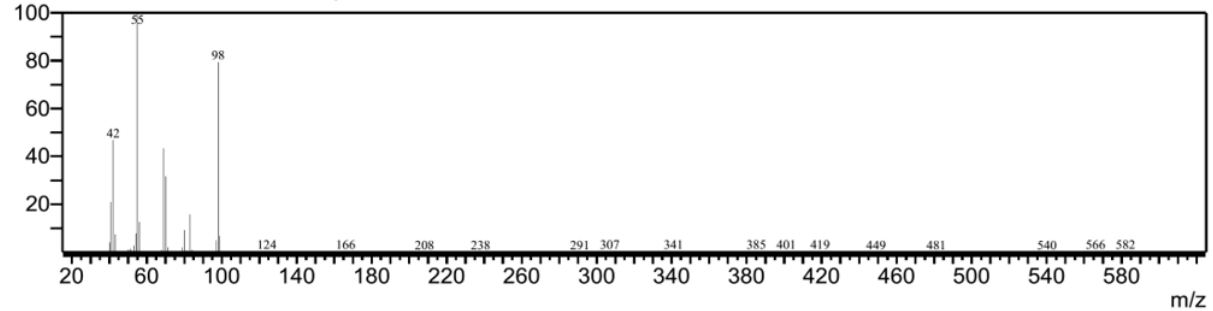

Entry 3

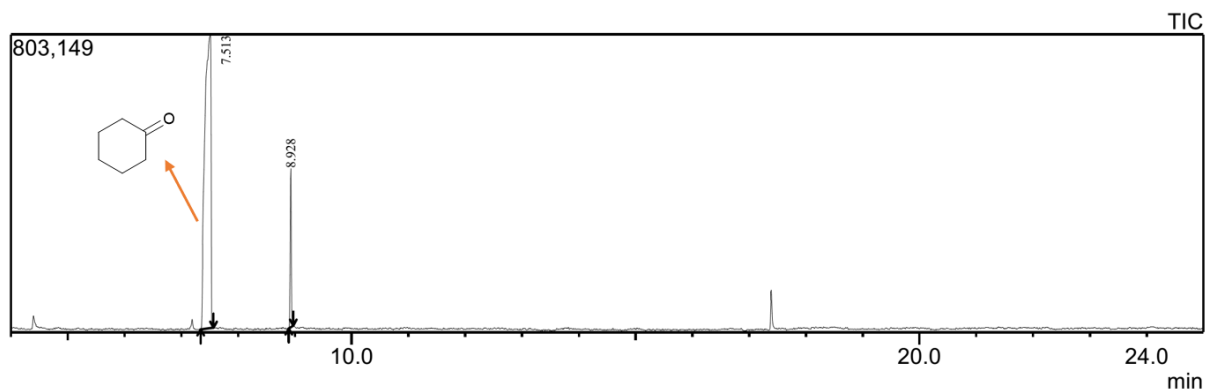

Peak Report TIC

| Peak# | R.Time | Area    | Area%  | Height  | Height% | A/H  | Name          |
|-------|--------|---------|--------|---------|---------|------|---------------|
| 1     | 7.513  | 5951827 | 91.44  | 790827  | 64.92   | 7.53 | Cyclohexanone |
| 2     | 8.928  | 557014  | 8.56   | 427362  | 35.08   | 1.30 | Decane        |
|       |        | 6508841 | 100.00 | 1218189 | 100.00  |      |               |

Line#:1 R.Time:7.510(Scan#:703)

MassPeaks:293

RawMode:Averaged 7.505-7.515(702-704) BasePeak:55(190499)

BG Mode:Calc. from Peak Group 1 - Event 1 Scan

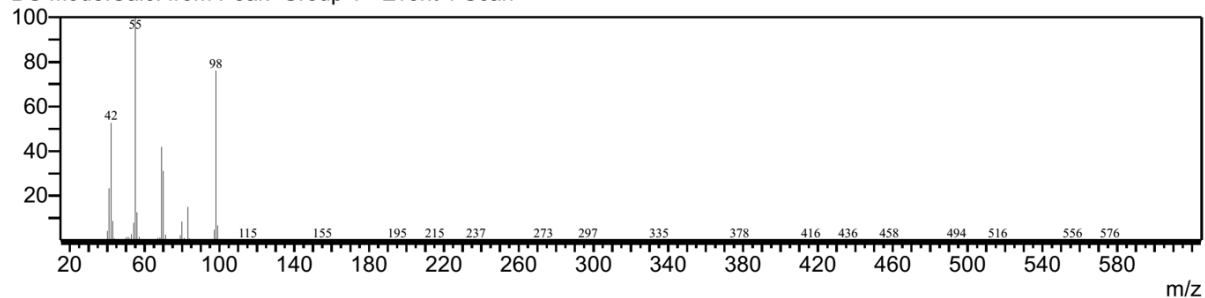

# Transfer hydrogenation of cyclohexanone with 5 using CuI

## Entry 1

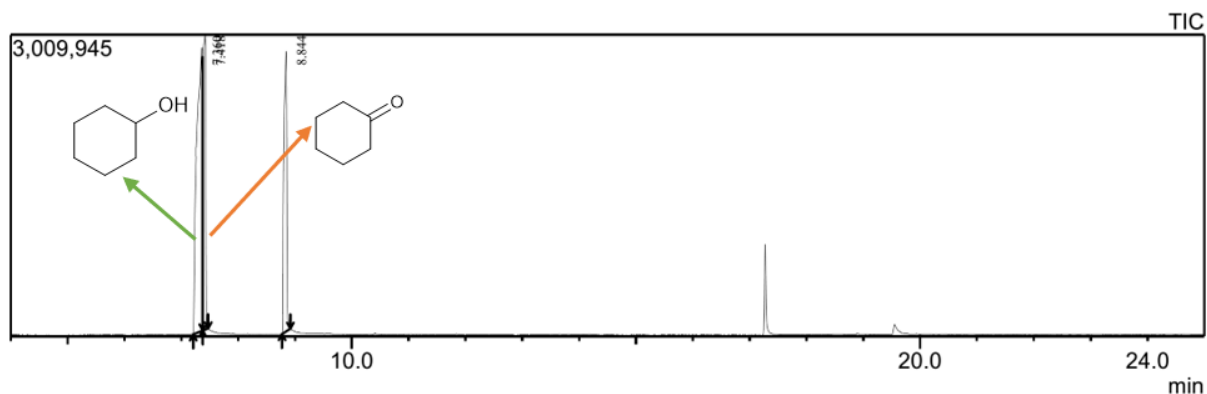

Peak Report TIC

| Peak# | R.Time | Area     | Area%  | Height  | Height% | A/H  | Name          |
|-------|--------|----------|--------|---------|---------|------|---------------|
| 1     | 7.360  | 20588976 | 53.23  | 2826617 | 33.03   | 7.28 | Cyclohexanol  |
| 2     | 7.418  | 8652175  | 22.37  | 2939617 | 34.35   | 2.94 | Cyclohexanone |
| 3     | 8.844  | 9439260  | 24.40  | 2791801 | 32.62   | 3.38 | Decane        |
|       |        | 38680411 | 100.00 | 8558035 | 100.00  |      |               |

Line#:1 R.Time:7.360(Scan#:673)

MassPeaks:257

RawMode:Averaged 7.355-7.365(672-674) BasePeak:57(121520)

BG Mode:Calc. from Peak Group 1 - Event 1 Scan

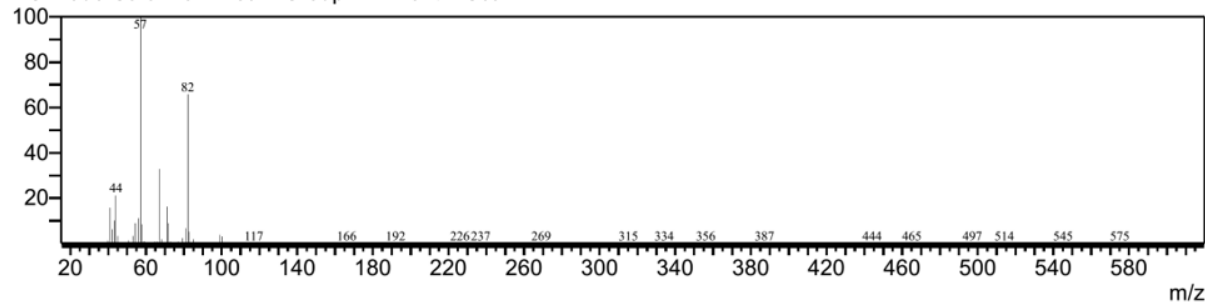

Line#:2 R.Time:7.420(Scan#:685)

MassPeaks:249

RawMode:Averaged 7.415-7.425(684-686) BasePeak:55(361522)

BG Mode:Calc. from Peak Group 1 - Event 1 Scan

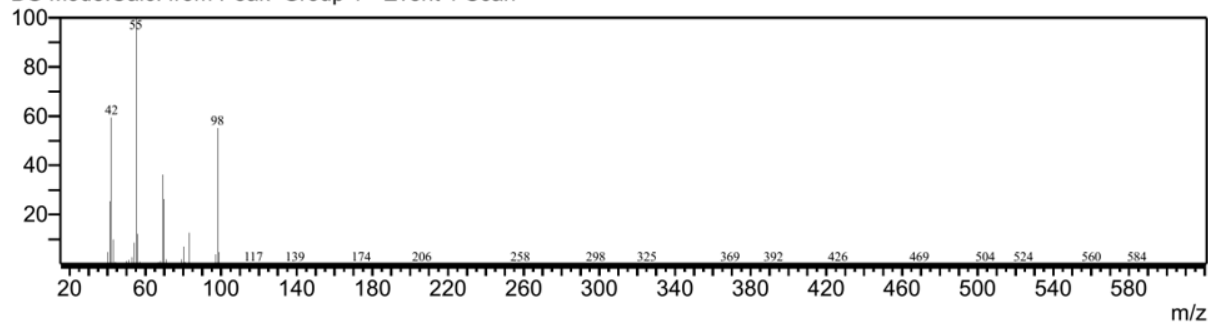

Entry 2

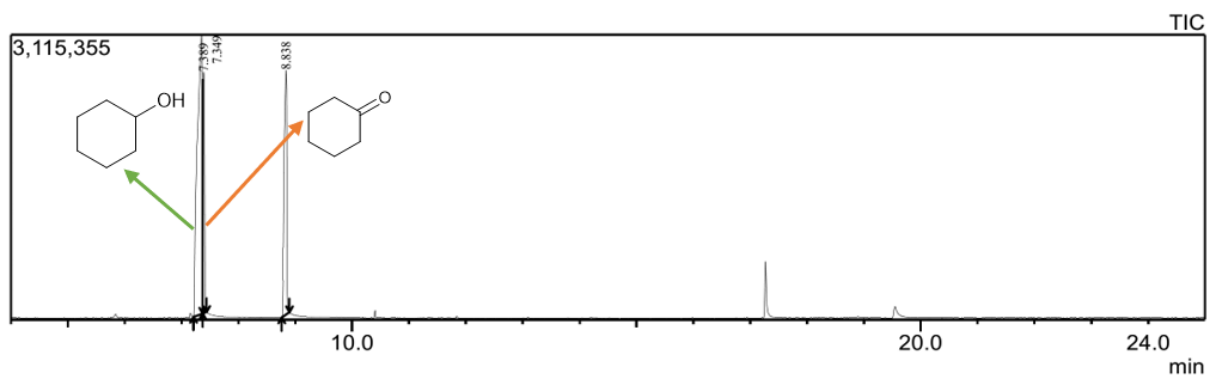

Peak Report TIC

| Peak# | R.Time | Area    | Area%  | Height  | Height% | A/H  | Name          |
|-------|--------|---------|--------|---------|---------|------|---------------|
| 1     | 7.349  | 8958326 | 57.27  | 3049478 | 36.52   | 6.22 | Cyclohexanol  |
| 2     | 7.389  | 5723272 | 17.29  | 2632254 | 31.52   | 2.17 | Cyclohexanone |
| 3     | 8.838  | 8419937 | 25.44  | 2669031 | 31.96   | 3.15 | Decane        |
|       |        | 3101535 | 100.00 | 8350763 | 100.00  |      |               |

Line#:1 R.Time:7.350(Scan#:671)

MassPeaks:292

RawMode:Averaged 7.345-7.355(670-672) BasePeak:57(364689)

BG Mode:Calc. from Peak Group 1 - Event 1 Scan

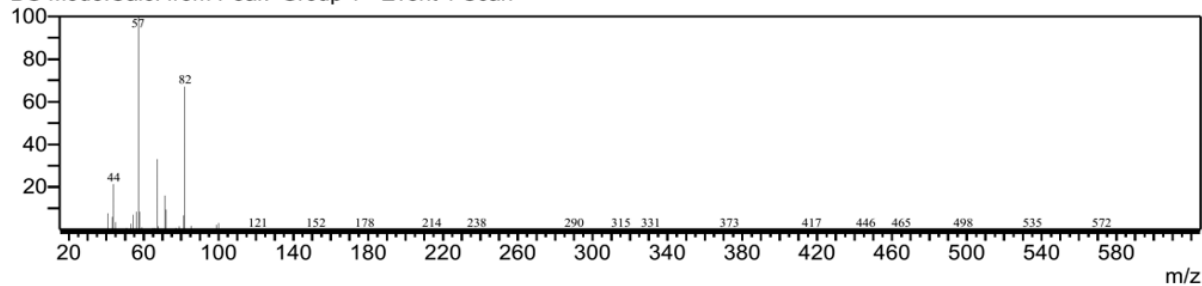

Line#:2 R.Time:7.390(Scan#:679)

MassPeaks:264

RawMode:Averaged 7.385-7.395(678-680) BasePeak:55(206791)

BG Mode:Calc. from Peak Group 1 - Event 1 Scan

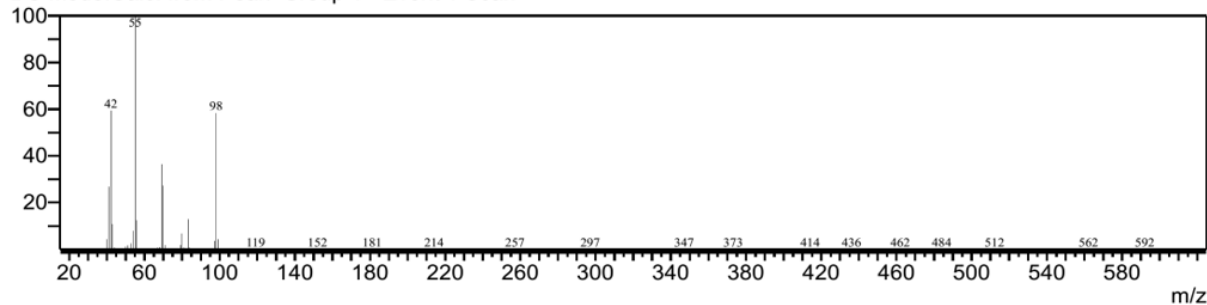

Entry 3

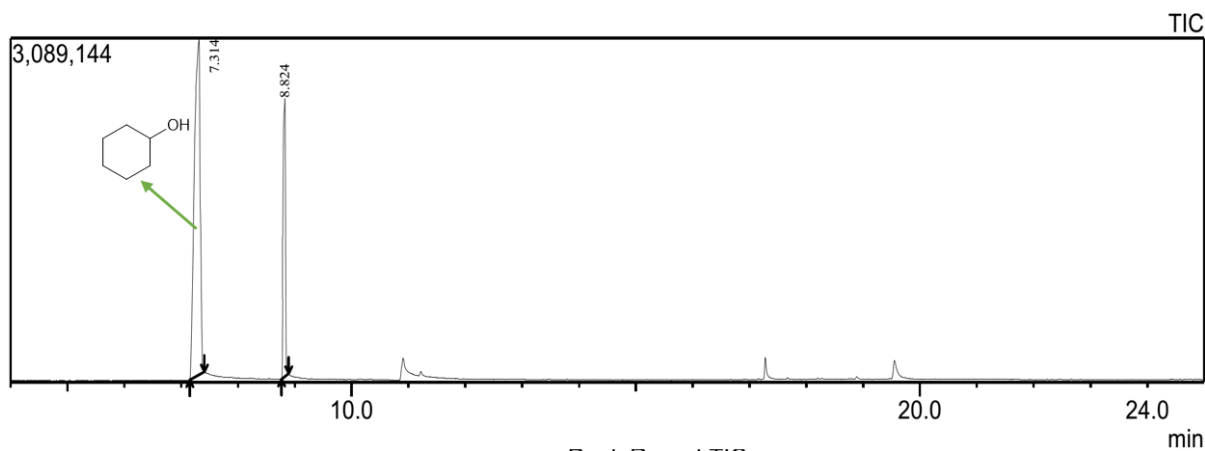

Peak Report TIC

| Peak# | R.Time | Area     | Area%  | Height  | Height% | A/H  | Name         |
|-------|--------|----------|--------|---------|---------|------|--------------|
| 1     | 7.314  | 21444886 | 74.91  | 3020184 | 54.77   | 7.10 | Cyclohexanol |
| 2     | 8.824  | 7184447  | 25.09  | 2493927 | 45.23   | 2.88 | Decane       |
|       |        | 28629333 | 100.00 | 5514111 | 100.00  |      |              |

Line#:1 R.Time:7.315(Scan#:664)

MassPeaks:313

RawMode:Averaged 7.310-7.320(663-665) BasePeak:57(620877)

BG Mode:Calc. from Peak Group 1 - Event 1 Scan

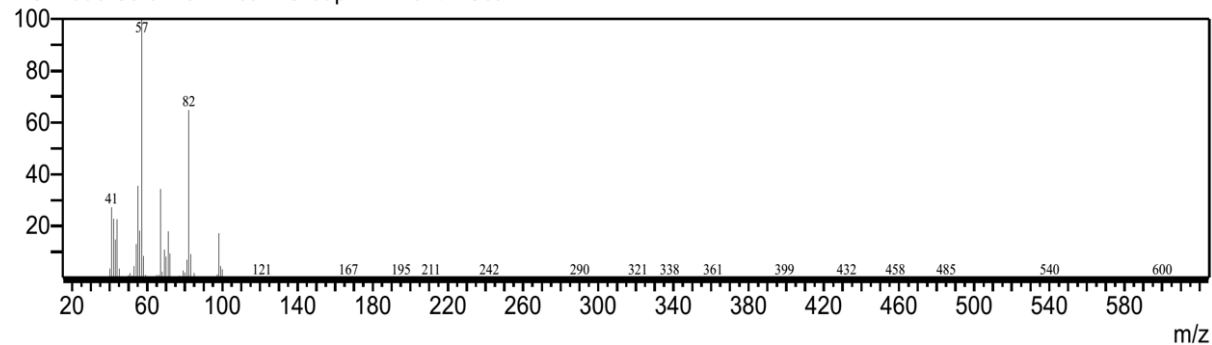



**Table S2.** Energies of all optimized structures.

| Carbene type              | Species                      | BP86/BS1         |                                     | BP86/BS1(SMD)                  | PBE0/BS2                       |
|---------------------------|------------------------------|------------------|-------------------------------------|--------------------------------|--------------------------------|
|                           |                              | G <sup>BS1</sup> | (G-E <sub>el</sub> ) <sup>BS1</sup> | E <sub>el</sub> <sup>Sol</sup> | E <sub>el</sub> <sup>BS2</sup> |
| [[Ru]NHC <sup>H</sup> ]   | 1(H)-PPh <sub>3</sub>        | -3554.665974     | 0.72826116                          | -3555.490115                   | -3555.0342                     |
|                           | 1a(H)-PPh <sub>3</sub>       | -2519.130707     | 0.47681831                          | -2519.697892                   | -2519.3316                     |
|                           | A(H)-PPh <sub>3</sub>        | -2252.477094     | 0.56292526                          | -2253.134026                   | -2252.8313                     |
|                           | TS-I(H)-PPh <sub>3</sub>     | -2252.478357     | 0.56142809                          | -2253.132118                   | -2252.8307                     |
|                           | B(H)-PPh <sub>3</sub>        | -2252.486952     | 0.56086789                          | -2253.136838                   | -2252.8358                     |
|                           | 2(H)-PPh <sub>3</sub>        | -3095.09395      | 0.73514464                          | -3095.921101                   | -3095.5142                     |
|                           | 2a(H)-PPh <sub>3</sub>       | -2059.548415     | 0.48372371                          | -2060.118049                   | -2059.7998                     |
|                           | 1(H)-PH <sub>3</sub>         | -2169.762269     | 0.27211656                          | -2170.118086                   | -2169.7598                     |
|                           | 1a(H)-PH <sub>3</sub>        | -1826.667998     | 0.24897346                          | -1827.003764                   | -1826.6859                     |
|                           | A(H)-PH <sub>3</sub>         | -1560.020744     | 0.33514418                          | -1560.442981                   | -1560.1897                     |
|                           | TS-I(H)-PH <sub>3</sub>      | -1560.021916     | 0.33377329                          | -1560.441601                   | -1560.1892                     |
|                           | B(H)-PH <sub>3</sub>         | -1560.031468     | 0.33377329                          | -1560.448606                   | -1560.1959                     |
|                           | 2(H)-PH <sub>3</sub>         | -1710.187349     | 0.27994911                          | -1710.54524                    | -1710.2346                     |
|                           | 2a(H)-PH <sub>3</sub>        | -1367.089007     | 0.25643237                          | -1367.426353                   | -1367.1557                     |
|                           | PS-C(H)-PH <sub>3</sub>      | -1870.711172     | 0.49599478                          | -1871.294938                   | -1871.0765                     |
|                           | PS-TS-II(H)-PH <sub>3</sub>  | -1870.705143     | 0.49501365                          | -1871.28905                    | -1871.0733                     |
|                           | PS-D(H)-PH <sub>3</sub>      | -1870.703918     | 0.49696454                          | -1871.291232                   | -1871.0746                     |
|                           | NPS-C(H)-PH <sub>3</sub>     | -1676.612993     | 0.3966251                           | -1677.095011                   | -1676.8458                     |
|                           | NPS-TS-II(H)-PH <sub>3</sub> | -1676.604184     | 0.39659682                          | -1677.089282                   | -1676.8401                     |
|                           | NPS-D(H)-PH <sub>3</sub>     | -1676.60529      | 0.39553552                          | -1677.089517                   | -1676.8402                     |
|                           | E(H)-PH <sub>3</sub>         | -1870.723865     | 0.49936923                          | -1871.306919                   | -1871.0958                     |
| TS-III(H)-PH <sub>3</sub> | -1870.723463                 | 0.49672008       | -1871.30497                         | -1871.0909                     |                                |
| F(H)-PH <sub>3</sub>      | -1870.721697                 | 0.49867222       | -1871.305771                        | -1871.0915                     |                                |
|                           |                              |                  |                                     |                                |                                |
| [[Ru]NHC <sup>]</sup> ]   | 1'-PPh <sub>3</sub>          | -3554.242555     | 0.71452201                          | -3555.017011                   | -3554.5923                     |
|                           | 1a'-PPh <sub>3</sub>         | -2518.707899     | 0.46160879                          | -2519.222876                   | -2518.8887                     |
|                           | 2'-PPh <sub>3</sub>          | -3094.663311     | 0.72069403                          | -3095.442088                   | -3095.0643                     |
|                           | 2a'-PPh <sub>3</sub>         | -2059.122222     | 0.46912149                          | -2059.64158                    | -2059.3535                     |
|                           | 1'-PH <sub>3</sub>           | -2169.340508     | 0.25763632                          | -2169.640619                   | -2169.32                       |
|                           | 1a'-PH <sub>3</sub>          | -1826.250517     | 0.23436493                          | -1826.529352                   | -1826.249                      |
|                           | A'-PH <sub>3</sub>           | -1559.605117     | 0.32153111                          | -1559.969953                   | -1559.7553                     |
|                           | TS-I'-PH <sub>3</sub>        | -1559.605848     | 0.31929578                          | -1559.967279                   | -1559.7535                     |
|                           | B'-PH <sub>3</sub>           | -1559.611853     | 0.32022854                          | -1559.973846                   | -1559.7583                     |
|                           | 2'-PH <sub>3</sub>           | -1709.764921     | 0.2653992                           | -1710.067541                   | -1709.7933                     |
|                           | 2a'-PH <sub>3</sub>          | -1366.67066      | 0.24209486                          | -1366.951112                   | -1366.7164                     |
|                           | PS-C'-PH <sub>3</sub>        | -1870.292323     | 0.48154134                          | -1870.820957                   | -1870.6388                     |
|                           | PS-TS-II'-PH <sub>3</sub>    | -1870.287313     | 0.48036181                          | -1870.815092                   | -1870.6361                     |
|                           | PS-D'-PH <sub>3</sub>        | -1870.287164     | 0.48280388                          | -1870.818428                   | -1870.6391                     |
|                           | NPS-C'-PH <sub>3</sub>       | -1676.193999     | 0.38293646                          | -1676.620366                   | -1676.4083                     |
|                           | NPS-TS-II'-PH <sub>3</sub>   | -1676.188053     | 0.3818219                           | -1676.614762                   | -1676.4041                     |
|                           | NPS-D'-PH <sub>3</sub>       | -1676.18706      | 0.38373081                          | -1676.616829                   | -1676.4052                     |
|                           | E'-PH <sub>3</sub>           | -1870.309827     | 0.48539478                          | -1870.835387                   | -1870.6626                     |
|                           | TS-III'-PH <sub>3</sub>      | -1870.310272     | 0.48248967                          | -1870.833121                   | -1870.6593                     |
|                           | F'-PH <sub>3</sub>           | -1870.308699     | 0.4849824                           | -1870.834482                   | -1870.6609                     |
|                           |                              |                  |                                     |                                |                                |
|                           | 5(Me)-PPh <sub>3</sub>       | -3593.911035     | 0.75515164                          | -3594.758213                   | -3594.3084                     |

|                          |                               |              |            |              |            |
|--------------------------|-------------------------------|--------------|------------|--------------|------------|
| [[Ru]NHC <sup>Me</sup> ] | 5a(Me)-PPh <sub>3</sub>       | -2558.379418 | 0.50268013 | -2558.969542 | -2558.6063 |
|                          | 6(Me)-PPh <sub>3</sub>        | -3134.346526 | 0.76096658 | -3135.19654  | -3134.7918 |
|                          | 6a(Me)-PPh <sub>3</sub>       | -2098.799669 | 0.50911737 | -2099.39176  | -2099.0771 |
|                          | 5(Me)-PH <sub>3</sub>         | -2209.009951 | 0.29823203 | -2209.38915  | -2209.0346 |
|                          | 5a(Me)-PH <sub>3</sub>        | -1865.91722  | 0.27361005 | -1866.275343 | -1865.9599 |
|                          | A(Me)-PH <sub>3</sub>         | -1599.272328 | 0.36070375 | -1599.717807 | -1599.4677 |
|                          | TS-I(Me)-PH <sub>3</sub>      | -1599.273384 | 0.35940482 | -1599.716394 | -1599.4673 |
|                          | B(Me)-PH <sub>3</sub>         | -1599.284007 | 0.35894054 | -1599.723576 | -1599.4746 |
|                          | 6(Me)-PH <sub>3</sub>         | -1749.440503 | 0.30500286 | -1749.820395 | -1749.5136 |
|                          | 6a(Me)-PH <sub>3</sub>        | -1406.341802 | 0.28164089 | -1406.701427 | -1406.4345 |
|                          | PS-C(Me)-PH <sub>3</sub>      | -1909.961511 | 0.52019498 | -1910.566973 | -1910.3521 |
|                          | PS-TS-II(Me)-PH <sub>3</sub>  | -1909.954831 | 0.51994067 | -1910.561297 | -1910.3485 |
|                          | PS-D(Me)-PH <sub>3</sub>      | -1909.954114 | 0.52246701 | -1910.565239 | -1910.3509 |
|                          | NPS-C(Me)-PH <sub>3</sub>     | -1715.864498 | 0.42131953 | -1716.36761  | -1716.1229 |
|                          | NPS-TS-II(Me)-PH <sub>3</sub> | -1715.854824 | 0.42156079 | -1716.361641 | -1716.1164 |
|                          | NPS-D(Me)-PH <sub>3</sub>     | -1715.853735 | 0.42317816 | -1716.363728 | -1716.117  |
|                          | E(Me)-PH <sub>3</sub>         | -1909.969104 | 0.52588108 | -1910.576216 | -1910.3701 |
|                          | TS-III(Me)-PH <sub>3</sub>    | -1909.967966 | 0.5210157  | -1910.571892 | -1910.362  |
|                          | F(Me)-PH <sub>3</sub>         | -1909.966402 | 0.52325818 | -1910.573572 | -1910.3635 |
|                          |                               |              |            |              |            |
|                          | <b>Reagents</b>               |              |            |              |            |
|                          | PPh <sub>3</sub>              | -1035.48     | 0.222005   | -1035.418087 | -          |
|                          | PH <sub>3</sub>               | -343.06      | 0.001719   | -343.0128892 | -          |
|                          | CyO                           | -309.513     | 0.114858   | -309.5442496 | -          |
|                          | Me <sub>2</sub> CO            | -192.938     | 0.051783   | -192.9595152 | -          |
|                          | KCl                           | -1060.09     | -0.02269   | -1059.938999 | -          |
|                          | KO <sup>t</sup> Bu            | -832.704     | 0.085887   | -832.6013806 | -          |
|                          | IPA                           | -194.102     | 0.076225   | -194.1401243 | -          |
|                          | CyOH                          | -310.681     | 0.13749    | -310.7281758 | -          |
|                          | HO <sup>t</sup> Bu            | -233.359     | 0.101111   | -233.4004697 | -          |
|                          |                               |              |            |              |            |
|                          |                               |              |            |              |            |
|                          |                               |              |            |              |            |

### Calculation of final Gibbs free energies

$$G^{\text{Sol}} = E_{\text{el}}^{\text{Sol}} + (G - E_{\text{el}})^{\text{BS1}} \quad (\text{i})$$

$$\Delta G^{\text{Solv.}} = G^{\text{Sol}} - G^{\text{BS1}} \quad (\text{ii})$$

$$G^{\text{BS2}} = E_{\text{el}}^{\text{BS2}} + (G - E_{\text{el}})^{\text{BS1}} + \Delta G^{\text{Solv.}} + 0.003012 \quad (\text{iii})$$

(Standard state conversion)

## Cartesian Coordinates of all optimized structure

### 1-PPh<sub>3</sub>

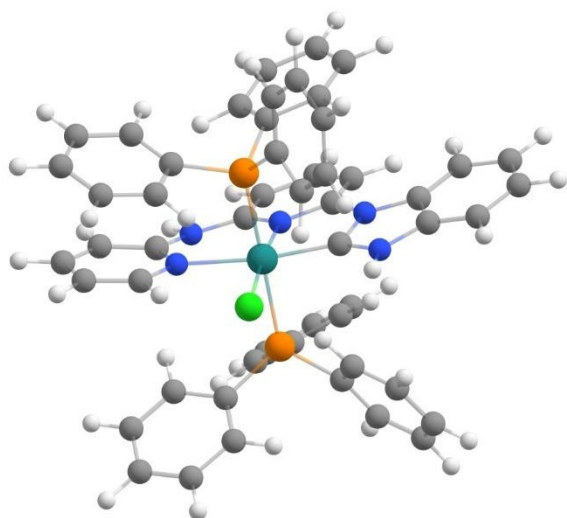

|    |                   |                   |                   |
|----|-------------------|-------------------|-------------------|
| Ru | -0.68481351437784 | 1.99306094577834  | -0.28468405141900 |
| Cl | -1.54366721532473 | 4.24215884540962  | 0.17365859337535  |
| P  | -0.01958243342594 | 2.65265411285379  | -2.47373711705246 |
| P  | -1.38939594548868 | 1.43715137906742  | 1.91306704841259  |
| N  | -1.88808142554340 | -0.90764136922639 | -1.19272118233655 |
| N  | 1.90953305458220  | 3.36796775088380  | 0.72808331402318  |
| N  | -2.56007858110134 | 1.39667372745676  | -1.13572071317317 |
| N  | 2.04161069066008  | 1.26495978030799  | 0.13047263680222  |
| N  | 0.13754223206123  | 0.15460122376005  | -0.52568868230020 |
| C  | 0.92247589844467  | 4.20724893486873  | -2.78735142368322 |
| C  | -1.07936391249795 | -0.34013604259611 | 2.29190709802855  |
| C  | -1.44221718955750 | 2.89482040194722  | -3.61245492851999 |
| C  | 1.53600662446417  | 4.39520556838595  | -4.04728666406561 |
| C  | 3.36579617346386  | 1.66635920969216  | 0.41840117171609  |
| C  | -2.78720949044950 | 0.11527197900227  | -1.50503004088569 |

|   |                   |                   |                   |
|---|-------------------|-------------------|-------------------|
| C | 2.18145162460783  | -1.15965199587715 | -0.33842283943514 |
| C | 1.11937520884693  | 1.36083478532439  | -3.12065576129501 |
| C | -3.16132844246829 | 1.74534464591287  | 2.27618857527282  |
| C | -4.71389518455606 | 2.02591551374217  | -2.05184065999693 |
| C | -0.47781471615253 | 2.34882545061221  | 3.22978605564612  |
| C | 1.68287109642699  | 6.42078461946688  | -2.10821488165526 |
| C | -3.52154006096414 | 2.32081635035175  | -1.39594457460273 |
| C | -3.51491600482211 | 2.82898608611514  | 3.10782534355316  |
| C | 1.45661649034755  | -2.31939967976261 | -0.64437047037835 |
| C | 1.48902403860830  | 0.04883182491339  | -0.27165157330170 |
| C | -3.97163177809336 | -0.26099901051862 | -2.18457326518112 |
| C | 4.62263235812848  | 1.04070740289263  | 0.35657809570053  |
| C | -2.09280708689894 | -1.30934760603590 | 2.41735162630389  |
| C | 0.98240294231294  | 5.23500000273240  | -1.82996644291086 |
| C | 1.13527079713467  | 2.33902886418523  | 0.29251754202777  |
| C | 1.67977162755294  | -0.92825242920098 | -3.78259551079800 |
| C | 2.32158421634693  | 6.59026978593122  | -3.34548807005939 |
| C | 3.26097895621633  | 3.02959397856018  | 0.80932113719192  |
| C | 0.58059685078776  | 4.48512447722850  | 3.71405428604147  |
| C | 5.63225176138004  | 3.15142527772288  | 1.11655381422865  |
| C | 0.71837388865250  | 0.05624296224366  | -3.49927388632273 |
| C | 2.23817546990132  | 5.57801217395411  | -4.31867276116760 |
| C | 0.27134809193000  | -0.74464689042834 | 2.38780657392493  |
| C | 3.44708947516557  | 0.64068448542232  | -3.25449375945201 |
| C | 4.38092983217616  | 3.78783399979247  | 1.16301199813107  |

|   |                   |                   |                   |
|---|-------------------|-------------------|-------------------|
| C | -5.53224553597520 | 1.35002878733552  | 1.83171102921442  |
| C | 5.75165331149894  | 1.80639480336887  | 0.71854112177715  |
| C | -3.10171367320114 | 2.30194962554072  | -5.29130754317377 |
| C | -0.10031456754560 | 3.64099434621001  | 2.84153112955169  |
| C | 2.49349808770484  | 1.62740199849515  | -2.98604076708640 |
| C | 0.08849236076257  | -2.23289866251990 | -0.89362734480871 |
| C | -3.30081622451900 | 4.40213356868376  | -4.09023110964734 |
| C | -2.14165992025643 | 4.09829444079168  | -3.37173154477404 |
| C | -0.42009357860541 | -3.05881163706255 | 2.68502089646193  |
| C | -0.18139311848955 | 1.90110975116513  | 4.54028581638496  |
| C | -4.94003445222634 | 0.70450905714338  | -2.46548150089601 |
| C | 0.59742658795599  | -2.09297260023671 | 2.58442962763024  |
| C | -4.86382191235921 | 3.16410495150137  | 3.30016986047218  |
| C | 0.90623822135147  | 4.04578289023452  | 5.00106959226518  |
| C | -1.76311989610153 | -2.66154566412369 | 2.60940923106467  |
| C | 3.04629564491004  | -0.63825539703420 | -3.66109080211448 |
| C | -3.79156654266150 | 3.50063569622238  | -5.04672945750199 |
| C | -4.18486354656207 | 1.01713675965510  | 1.62841357631458  |
| C | -5.87613364539801 | 2.42594544556500  | 2.66681254229293  |
| C | -1.92444583280596 | 1.99675982949640  | -4.58290380348123 |
| C | -0.54297954368886 | -0.97002209941343 | -0.85519822181035 |
| C | 0.52133411216613  | 2.75607966101838  | 5.41630734456028  |
| H | 1.51220111805559  | 4.28895342210648  | 0.90566525574455  |
| H | 1.46790581775746  | 3.61248276820219  | -4.81590088211721 |
| H | 3.24940524151909  | -1.20314869284141 | -0.11799241386448 |

|   |                   |                   |                   |
|---|-------------------|-------------------|-------------------|
| H | -5.44256257805718 | 2.82443314716361  | -2.23391955696135 |
| H | 1.71525252596805  | 7.22255738186064  | -1.35657920741033 |
| H | -3.28996062750244 | 3.33068915356401  | -1.03109720285352 |
| H | -2.73249804173332 | 3.41542082256304  | 3.60593665298748  |
| H | 1.96716152688103  | -3.28863111569583 | -0.68458252250190 |
| H | -4.11253512083938 | -1.30642152491127 | -2.49185944505441 |
| H | 4.74680481441703  | 0.00288951786691  | 0.03142947933021  |
| H | -3.14801897642430 | -1.01070859024054 | 2.39413519127276  |
| H | 0.41782954118128  | 5.12352892706390  | -0.89503143289995 |
| H | 1.35413212816541  | -1.93318892490717 | -4.08541008797411 |
| H | 2.87084130111659  | 7.51753640474745  | -3.56140434118539 |
| H | 0.85730918301385  | 5.49813512159937  | 3.38933822362144  |
| H | 6.53332790368875  | 3.71569050187310  | 1.39110226699005  |
| H | -0.34559367159452 | -0.20564784092124 | -3.54485821684800 |
| H | 2.71822522214630  | 5.71322399241546  | -5.29799413420234 |
| H | 1.06989898560268  | 0.00825085331708  | 2.33254510075968  |
| H | 4.51161990304323  | 0.87481438478029  | -3.14834539952405 |
| H | 4.28357577348611  | 4.83942952757840  | 1.46080124502164  |
| H | -6.31546331940401 | 0.76955646143764  | 1.32463994492904  |
| H | 6.74956268980882  | 1.34336863481673  | 0.68785653160368  |
| H | -3.47172785327784 | 1.59960234570429  | -6.05119637013914 |
| H | -0.39630870402128 | 3.99188768132449  | 1.84384879792052  |
| H | 2.82827482882545  | 2.62173745205103  | -2.66271954347870 |
| H | -0.50138022761784 | -3.12534748589619 | -1.13953898971940 |
| H | -3.82683934102500 | 5.34763323768726  | -3.89709721048159 |

|   |                   |                   |                   |
|---|-------------------|-------------------|-------------------|
| H | -1.77685845404279 | 4.79244911043094  | -2.60131550067685 |
| H | -0.16471449404224 | -4.11643502310744 | 2.83885749654686  |
| H | -0.48596667519217 | 0.90009938957466  | 4.87399802386639  |
| H | -5.85784753378892 | 0.42570181865619  | -3.00064725989577 |
| H | 1.65193256290358  | -2.39122311640185 | 2.66105192302288  |
| H | -5.12293677860585 | 4.01104554831201  | 3.95071532235703  |
| H | 1.45031013831315  | 4.70676448508855  | 5.69032935622679  |
| H | -2.56641478945445 | -3.40463192724400 | 2.71691791302179  |
| H | 3.79205330900032  | -1.41478916152805 | -3.87743793407778 |
| H | -4.70553596145616 | 3.73572566463437  | -5.60961266894125 |
| H | -3.94009979101611 | 0.19331395094842  | 0.94857643472113  |
| H | -6.93162969593374 | 2.69074124022051  | 2.82039864224741  |
| H | -1.38475592575020 | 1.07039276697546  | -4.81037163810965 |
| H | 0.76038659553357  | 2.41071499089449  | 6.43205512880322  |
| H | -2.26904129697888 | -1.82892341377346 | -1.40905380476083 |

---

**1a-PPh<sub>3</sub>**

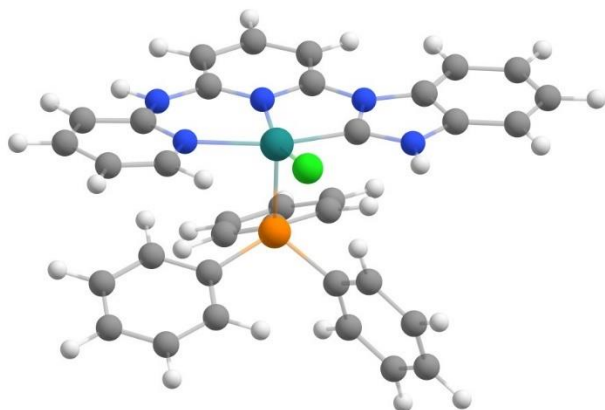

|    |                   |                   |                   |
|----|-------------------|-------------------|-------------------|
| Ru | -0.70288534419027 | 2.05512550058765  | -0.20633360940639 |
| Cl | -1.00739426280666 | 4.40247443949471  | -0.24710512296689 |
| P  | -1.21502673500102 | 1.51451927594128  | 1.89483078965790  |
| N  | -2.15737548226243 | -0.65101803041751 | -1.34717466191204 |
| N  | 2.01249576217967  | 3.17694168420743  | 0.72534899515586  |
| N  | -2.64517396708153 | 1.68734430798966  | -1.05852822122727 |
| N  | 1.96095286552208  | 1.07954282916420  | 0.07025331617272  |
| N  | -0.03967612454809 | 0.17848856735032  | -0.63026208047279 |
| C  | -0.59304527261257 | -0.14591083266195 | 2.39627966491071  |
| C  | 3.29663718161652  | 1.33442015638436  | 0.44551388902242  |
| C  | -3.00861712250947 | 0.44857531809947  | -1.47119087147132 |
| C  | 1.89330992499865  | -1.30546976016560 | -0.60087574100543 |
| C  | -3.03716306218609 | 1.59027016891488  | 2.09672478105246  |
| C  | -4.85770106196894 | 2.50365707060474  | -1.61872478999306 |
| C  | -0.56268412353643 | 2.58091523810024  | 3.24627933573134  |
| C  | -3.56615931392839 | 2.68867988385235  | -1.13556959461788 |
| C  | -3.60831282935249 | 2.72371775875703  | 2.71299233983263  |
| C  | 1.08044557574729  | -2.36047309815392 | -1.04508002998782 |
| C  | 1.30226586087382  | -0.05811727043867 | -0.39980028652340 |



|   |                   |                   |                   |
|---|-------------------|-------------------|-------------------|
| C | -4.29782631417340 | 0.19016665359780  | -1.99960549541943 |
| C | 4.46979412898577  | 0.56664575054975  | 0.47360847230719  |
| C | -1.38761145927674 | -1.30514850944897 | 2.49313731394032  |
| C | 1.16147095709245  | 2.22640776640275  | 0.26356287612125  |
| C | 3.31608333421757  | 2.69594376274939  | 0.86371592530498  |
| C | 0.14065845797558  | 4.75477440748791  | 4.09289140768440  |
| C | 5.65625994102950  | 2.53816728623546  | 1.34233348512429  |
| C | 0.79873715107448  | -0.24589656865469 | 2.62913531880845  |
| C | 4.48663506856182  | 3.31583168155650  | 1.31357718671009  |
| C | -5.27527563149699 | 0.78442061243355  | 1.54662202024294  |
| C | 5.64532270394868  | 1.19039454462918  | 0.92978529923322  |
| C | -0.29031269190141 | 3.94677221280525  | 3.02813057068937  |
| C | -0.27277956628366 | -2.13493018403435 | -1.29162538971827 |
| C | 0.59074597269954  | -2.64143619024007 | 2.98825089577555  |
| C | -0.41942918294063 | 2.03752750824941  | 4.54289887934256  |
| C | -5.22873396424646 | 1.22335020470978  | -2.06872407617855 |
| C | 1.38534110642899  | -1.48359216857112 | 2.92135626220088  |
| C | -5.00306204103992 | 2.88124190475174  | 2.74472990613770  |
| C | 0.30019720330415  | 4.20887858882657  | 5.37723491710726  |
| C | -0.79471239580626 | -2.54579260123030 | 2.78422296478299  |
| C | -3.88410606991089 | 0.62620345663155  | 1.50485747143918  |
| C | -5.83914021471267 | 1.91358052123266  | 2.16565191873480  |
| C | -0.80777498353990 | -0.84323892305430 | -1.08450140105103 |
| C | 0.01409763503464  | 2.85099893234871  | 5.60032530053427  |
| H | 1.68215089897413  | 4.12554153586134  | 0.91648960003592  |

|   |                   |                   |                   |
|---|-------------------|-------------------|-------------------|
| H | 2.95743715502253  | -1.46009810805961 | -0.40433080543963 |
| H | -5.55649830553285 | 3.35035542969058  | -1.64448642073553 |
| H | -3.20356707632799 | 3.66590519328299  | -0.78033113280075 |
| H | -2.96162625265427 | 3.48885120087898  | 3.16526004013835  |
| H | 1.51232548676978  | -3.35795472190224 | -1.20636274381790 |
| H | -4.55340049596914 | -0.82355957673512 | -2.34341126062829 |
| H | 4.49893458252910  | -0.48045899450281 | 0.15210220850549  |
| H | -2.47677651687617 | -1.24524322781960 | 2.37555395194621  |
| H | 0.34634865754436  | 5.82153398746894  | 3.91608196642458  |
| H | 6.59578624746925  | 2.99045912184065  | 1.69120747839261  |
| H | 1.42462993879778  | 0.65856191564916  | 2.61005075512590  |
| H | 4.48718682055190  | 4.36782916141064  | 1.63141852931598  |
| H | -5.92357044770791 | 0.02455927791857  | 1.08535908137873  |
| H | 6.57746384417161  | 0.60805182964303  | 0.96032925023840  |
| H | -0.44295306429572 | 4.37588818796112  | 2.02439386300745  |
| H | -0.92570565310263 | -2.94446315314730 | -1.64810660210781 |
| H | 1.04871352955938  | -3.61394376971981 | 3.22320554002912  |
| H | -0.64784988336943 | 0.97818901263541  | 4.72927411055507  |
| H | -6.23478622456116 | 1.03268172352378  | -2.47039459976989 |
| H | 2.46832611631109  | -1.54103988977380 | 3.10753710182710  |
| H | -5.43711913926505 | 3.76920355249034  | 3.22812722583635  |
| H | 0.64166859082469  | 4.84337515519756  | 6.20898052402710  |
| H | -1.42784167774501 | -3.44185952346053 | 2.86898321146647  |
| H | -3.45710911765698 | -0.24148271914330 | 0.98650186482941  |
| H | -6.93180574989859 | 2.03952463031301  | 2.19359436314306  |

|   |                   |                   |                   |
|---|-------------------|-------------------|-------------------|
| H | 0.12670922479015  | 2.42003875603116  | 6.60653219282988  |
| H | -2.60540310233070 | -1.51172984510812 | -1.66516942555966 |

---

**A (H)-PPh<sub>3</sub>**

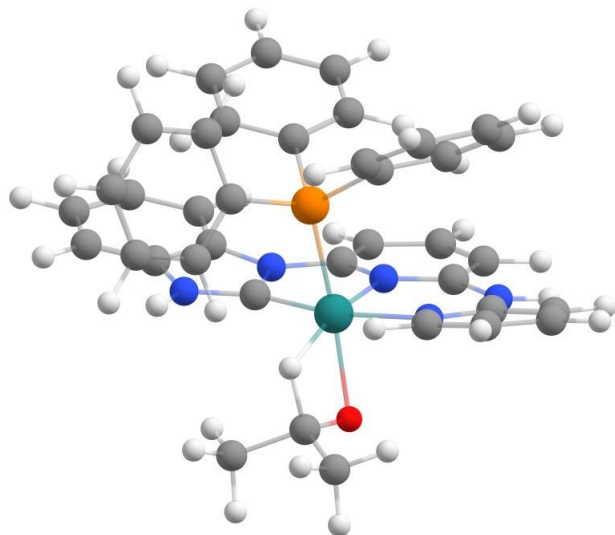

|    |                   |                   |                   |
|----|-------------------|-------------------|-------------------|
| Ru | -0.23523537456845 | 1.72321051134492  | -0.60261692568180 |
| H  | -0.70639813329166 | 3.33372579102099  | -1.22086037137901 |
| N  | -1.21288875377890 | -1.31287653643562 | -1.39488274348049 |
| N  | 2.16551537098747  | 3.31340653901663  | 0.59358912776942  |
| N  | -2.14965967045461 | 0.88919972719948  | -1.14487598077943 |
| N  | 2.38599387474255  | 1.13370848064577  | 0.38152845324908  |
| N  | 0.63078438309168  | -0.12483775853505 | -0.42400547784885 |
| C  | 3.53127244922885  | 1.57282931103333  | 1.08746719605603  |
| C  | -2.29353111611716 | -0.42734587968448 | -1.43382587232949 |
| C  | 2.71011354892811  | -1.30721566739797 | 0.06353060713117  |
| H  | 3.75753650746491  | -1.28170759978600 | 0.39049363977205  |
| C  | -4.55019279773842 | 1.19284554914584  | -1.40484833502793 |
| H  | -5.41409322097000 | 1.87516604647665  | -1.35884863225288 |

|   |                   |                   |                   |
|---|-------------------|-------------------|-------------------|
| C | -3.27066708776503 | 1.66574153758293  | -1.11434748412104 |
| H | -3.10722809864869 | 2.72029514397315  | -0.83399821058715 |
| C | 2.11931388488436  | -2.50640260208471 | -0.37097198315747 |
| H | 2.69821192071211  | -3.44537240568759 | -0.35523106754040 |
| C | 1.93609074523461  | -0.13983498804900 | 0.02495355520634  |
| C | -3.56044153267945 | -0.98001315546938 | -1.77223282160361 |
| H | -3.64354715964724 | -2.05360176444180 | -2.01884182680673 |
| C | 4.64046721127418  | 0.92587949605935  | 1.65662812515881  |
| H | 4.78119767180203  | -0.16369805435235 | 1.60909750779978  |
| C | 1.51249983324075  | 2.21286465779272  | 0.09961343733697  |
| C | 3.37726669244061  | 2.98250119264795  | 1.21563358691755  |
| C | 5.42882424306002  | 3.12057011138227  | 2.45333602770184  |
| H | 6.18947114593936  | 3.71146756854700  | 2.99224557703460  |
| C | 4.31459526088170  | 3.77563951046941  | 1.89216975436174  |
| H | 4.18243168269571  | 4.86712464772709  | 1.98567994584428  |
| C | 5.58447043296029  | 1.72185083131207  | 2.33797203745604  |
| H | 6.46363658744072  | 1.23368763362420  | 2.79268810000569  |
| C | 0.80312802244616  | -2.50231686682068 | -0.84299582306698 |
| H | 0.32957210224890  | -3.43251717593102 | -1.20223350152762 |
| C | -4.69238490568652 | -0.16534013391428 | -1.75836648267150 |
| H | -5.68155104842598 | -0.58684637046863 | -2.00780968141802 |
| C | 0.08004080317563  | -1.28275328531071 | -0.87665451512907 |
| H | -1.46760073215412 | -2.24706234408817 | -1.73124844768613 |
| O | 0.13790298914139  | 1.90749063426467  | -2.65793181688166 |
| C | -0.26185477725922 | 3.17629049197688  | -2.48090783180968 |

|   |                   |                   |                   |
|---|-------------------|-------------------|-------------------|
| C | 0.84713365067949  | 4.25238351256910  | -2.55778277719963 |
| C | -1.52510334704874 | 3.59036149484201  | -3.27052183325579 |
| P | -0.95074935759057 | 1.90495675102217  | 1.59713761475394  |
| C | 0.22388132301596  | 1.07340198069569  | 2.78219473958134  |
| C | -2.65393375449232 | 1.23989825121225  | 1.94473670885792  |
| C | -1.05792048150679 | 3.62417021037676  | 2.28679877663485  |
| C | 0.30447735416826  | -0.33816872276238 | 2.85105480340555  |
| C | 1.19217086146683  | 1.83764097529203  | 3.47933820349580  |
| C | -3.72321014644010 | 2.11109974995658  | 2.26253145780413  |
| C | -2.94097985863618 | -0.13173363049915 | 1.73566559250763  |
| C | -0.94994169647518 | 4.74440254586900  | 1.43556953087650  |
| C | -1.29040703585583 | 3.83015897035773  | 3.66983974146904  |
| C | 1.31222435888620  | -0.96489710372112 | 3.60648585338655  |
| H | -0.41859867778452 | -0.97194499756568 | 2.31397481152031  |
| C | 2.20127198122183  | 1.20827897368968  | 4.23050870755715  |
| H | 1.16779172602510  | 2.93902203944853  | 3.44073579037118  |
| C | -5.03609825042731 | 1.61879221240859  | 2.38968135971823  |
| H | -3.54003258619779 | 3.18847126359968  | 2.40973827090215  |
| C | -4.25059510949946 | -0.62181705277111 | 1.86990447792648  |
| H | -2.14278717089194 | -0.83550779361215 | 1.44657971812091  |
| C | -1.05492967375610 | 6.05136730725075  | 1.95184722538868  |
| H | -0.79876482706945 | 4.58331909941728  | 0.35150448912310  |
| C | -1.39417093304283 | 5.13414839844644  | 4.18468046695305  |
| H | -1.39324688890490 | 2.96507973691750  | 4.34943226735828  |
| C | 2.26653737846571  | -0.19494642200772 | 4.29730804628147  |

|   |                   |                   |                   |
|---|-------------------|-------------------|-------------------|
| H | 1.34955086563764  | -2.06785470134855 | 3.65210889442443  |
| H | 2.94650032094859  | 1.82633535106371  | 4.76148561088924  |
| C | -5.30525912263718 | 0.25232424056105  | 2.19702400082947  |
| H | -5.85504171366279 | 2.31539488107580  | 2.64328553583629  |
| H | -4.44980703239475 | -1.69653999478426 | 1.71104102526737  |
| C | -1.27257615021609 | 6.24750722049388  | 3.32811733230721  |
| H | -0.97262484488267 | 6.91950119186375  | 1.27367045688391  |
| H | -1.57406796788894 | 5.28351917934037  | 5.26420043225516  |
| H | 3.05923559514530  | -0.68814080317589 | 4.88705577991466  |
| H | -6.33509142537749 | -0.13293868727886 | 2.30006268644230  |
| H | -1.35431907895356 | 7.27061838474128  | 3.73607058419539  |
| H | 1.74915631634375  | 4.24927332830442  | 0.57797430057008  |
| H | -1.23422422776750 | 3.70527242335179  | -4.33939124404093 |
| H | -1.94240654635189 | 4.56269911062075  | -2.92511887972120 |
| H | -2.31264797143611 | 2.81201837933540  | -3.22441259873919 |
| H | 1.10536488874270  | 4.40799919387907  | -3.62986422289095 |
| H | 1.76858167285675  | 3.92397281874865  | -2.03618705841186 |
| H | 0.51529462874824  | 5.23424790798926  | -2.14922752556471 |

---

TS-I (H)-PPh<sub>3</sub>

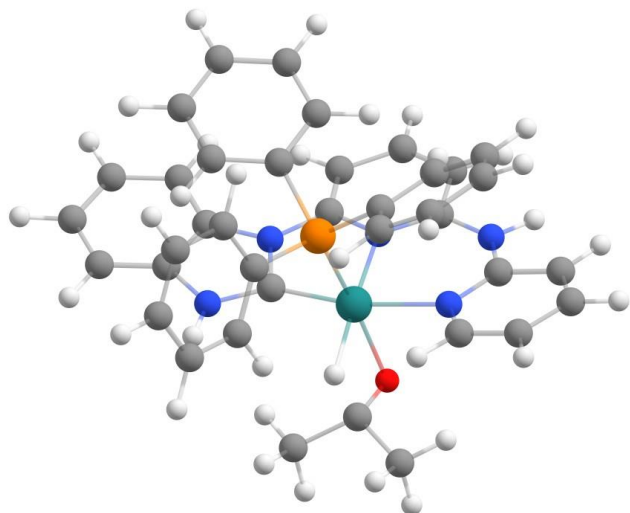

|    |                   |                   |                   |
|----|-------------------|-------------------|-------------------|
| Ru | -0.22573223792322 | 1.60080508076361  | -0.56970107383541 |
| H  | -1.02762313998827 | 3.04375713645022  | -1.06283878184694 |
| N  | -0.61317145042788 | -1.58699300327143 | -1.31266097003084 |
| N  | 1.86261669407319  | 3.62406995346717  | 0.55229682329855  |
| N  | -1.95070129055396 | 0.40373185836120  | -1.06863686758532 |
| N  | 2.48559795007526  | 1.52202379262475  | 0.35734687329425  |
| N  | 0.99103132365266  | -0.06430220576049 | -0.39312801084228 |
| C  | 3.54646445126540  | 2.18188774226810  | 1.02263404182158  |
| C  | -1.84286683736386 | -0.92129319810059 | -1.33915352162518 |
| C  | 3.26819073177943  | -0.81571226070204 | 0.04868197893122  |
| H  | 4.29950342203868  | -0.58747699495116 | 0.34680986927496  |
| C  | -4.37006930594893 | 0.23176741102573  | -1.27805157349984 |
| H  | -5.34876164630005 | 0.73454467210835  | -1.21941015281698 |
| C  | -3.20118095459471 | 0.94847906473450  | -1.02310618805232 |
| H  | -3.23763766786824 | 2.01883320778197  | -0.75960256178263 |
| C  | 2.90740981189101  | -2.11168049175638 | -0.36059361314394 |
| H  | 3.65662581224791  | -2.92153745639264 | -0.35146038699133 |

|   |                   |                   |                   |
|---|-------------------|-------------------|-------------------|
| C | 2.28203829751214  | 0.17999081704076  | 0.02162944258941  |
| C | -2.98563049235499 | -1.71276643027006 | -1.64377250947613 |
| H | -2.86427479711994 | -2.78595173756775 | -1.87607848267321 |
| C | 4.77409949544540  | 1.76707769062500  | 1.56481815967345  |
| H | 5.11873137138201  | 0.72356456008445  | 1.52590511495095  |
| C | 1.41573861800051  | 2.41302263143374  | 0.08909047114806  |
| C | 3.13194904151197  | 3.53908105855432  | 1.13976992266889  |
| C | 5.15508673898971  | 4.08544943453941  | 2.30919610637159  |
| H | 5.80550254929742  | 4.81925096848348  | 2.81582024832546  |
| C | 3.92084269335013  | 4.50737552330160  | 1.77642977620225  |
| H | 3.58653004263596  | 5.55560049088706  | 1.86053643275611  |
| C | 5.56935995789155  | 2.73940678987058  | 2.20598642066189  |
| H | 6.53795614147877  | 2.43444730830660  | 2.63822505123392  |
| C | 1.60496689083007  | -2.36826435755889 | -0.79983259284151 |
| H | 1.31201128004547  | -3.37709200854556 | -1.13897489261013 |
| C | -4.25357143559130 | -1.13337327048368 | -1.61347246533914 |
| H | -5.14682837186394 | -1.74251205301065 | -1.83583031552409 |
| C | 0.66208942981105  | -1.30848022760493 | -0.82485113354486 |
| H | -0.69514168952512 | -2.55717435622647 | -1.63337161686628 |
| O | 0.08687586571798  | 1.78568238222534  | -2.65892436680916 |
| C | -0.51650561334223 | 2.94881595782767  | -2.48712451317466 |
| C | 0.36515282654973  | 4.21269285671471  | -2.54147532952075 |
| C | -1.87004725158971 | 3.13652751147131  | -3.20159147200411 |
| P | -0.91453039196248 | 1.68217617601604  | 1.63666168671524  |
| C | 0.42309820435798  | 1.10890864785851  | 2.80442514523430  |



|   |                   |                   |                  |
|---|-------------------|-------------------|------------------|
| C | -2.44401151842074 | 0.69724918985924  | 2.02947627843180 |
| C | -1.33664766388206 | 3.35365833017744  | 2.32260881575937 |
| C | 0.77394724920214  | -0.25965358514186 | 2.88939645306025 |
| C | 1.24121266141296  | 2.05619735383930  | 3.46855898436077 |
| C | -3.65415223021737 | 1.34105374279261  | 2.38166975611428 |
| C | -2.45835647869161 | -0.70520086845383 | 1.82996235188030 |
| C | -1.45436131285034 | 4.47401379710534  | 1.47311681638731 |
| C | -1.57900131148155 | 3.51338294522155  | 3.71032272524226 |
| C | 1.89939908219881  | -0.66883457977464 | 3.62747608472997 |
| H | 0.17205336300312  | -1.02909390347723 | 2.38084105745204 |
| C | 2.36866018353710  | 1.64479099583884  | 4.20218823961489 |
| H | 1.00413125077961  | 3.13158608264246  | 3.41832793302345 |
| C | -4.83809906924827 | 0.59819607921948  | 2.55198606538427 |
| H | -3.68396281261196 | 2.43442546278143  | 2.52149264620025 |
| C | -3.63914897307609 | -1.44508004502109 | 2.00738355978922 |
| H | -1.54617338787462 | -1.23592488164585 | 1.51068456646019 |
| C | -1.79263765355877 | 5.73836525515712  | 1.99517662306775 |
| H | -1.29196673999021 | 4.34179621314727  | 0.38670758642827 |
| C | -1.91655115523245 | 4.77498625392248  | 4.23049855341063 |
| H | -1.50402447582263 | 2.64577808144329  | 4.39043961198876 |
| C | 2.70353323703838  | 0.28136808340455  | 4.28440719338810 |
| H | 2.14820084072505  | -1.74335555132022 | 3.68673627390174 |
| H | 2.99227950380892  | 2.40283045594897  | 4.70797759156408 |
| C | -4.83541472682715 | -0.79585337781713 | 2.36939877936824 |
| H | -5.77096924484073 | 1.11978762452576  | 2.83113035163460 |

|   |                   |                   |                   |
|---|-------------------|-------------------|-------------------|
| H | -3.62596237792901 | -2.53900841954634 | 1.85521821417796  |
| C | -2.02016856979781 | 5.89119351474843  | 3.375273144461655 |
| H | -1.88461138448128 | 6.60640222235478  | 1.31803959650297  |
| H | -2.10234866112662 | 4.88813400377518  | 5.31340468316897  |
| H | 3.58886824119558  | -0.04069333962532 | 4.86051215013169  |
| H | -5.76402375161399 | -1.37762675333724 | 2.50670215775141  |
| H | -2.28494817157643 | 6.88111174032867  | 3.78742215948031  |
| H | 1.27581655670926  | 4.46362701566880  | 0.53907116379559  |
| H | -2.44792027432508 | 3.99984965883074  | -2.80400711854624 |
| H | -2.49041013932850 | 2.21956565709925  | -3.15994913866936 |
| H | -1.65365957430725 | 3.34140349074969  | -4.27549454593877 |
| H | -0.12955947314097 | 5.09799905953871  | -2.08210282666524 |
| H | 0.54744152763325  | 4.45543090868651  | -3.61388762491365 |
| H | 1.34964236749680  | 4.04031141372920  | -2.06398708625021 |

---

**B (H)-PPh<sub>3</sub>**

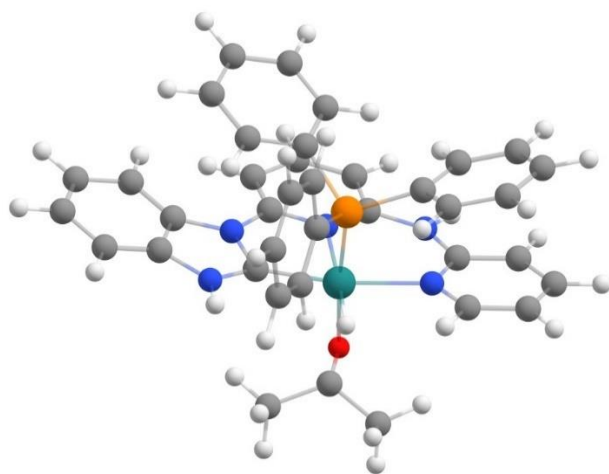

|    |                   |                  |                   |
|----|-------------------|------------------|-------------------|
| Ru | -0.34134514753386 | 1.66222151145698 | -0.49356737227815 |
|----|-------------------|------------------|-------------------|

|   |                   |                   |                   |
|---|-------------------|-------------------|-------------------|
| H | -1.31120383635156 | 2.98343619746298  | -0.53795859593835 |
| N | -0.59149838361781 | -1.57729103343057 | -1.18312746120806 |
| N | 1.70097571756975  | 3.75345259585334  | 0.57966211180268  |
| N | -1.99922673965324 | 0.38852275900957  | -1.01807174891777 |
| N | 2.41449550808643  | 1.68468333528654  | 0.33665396010973  |
| N | 0.98724091397834  | 0.01243210479494  | -0.35911374120958 |
| C | 3.47210175033823  | 2.39231154056283  | 0.95596785385711  |
| C | -1.83422963570664 | -0.93681439831911 | -1.26755157669085 |
| C | 3.29481797931872  | -0.62590267189014 | 0.04044339769844  |
| H | 4.32485171390211  | -0.35624303553980 | 0.30527068696078  |
| C | -4.39963818416410 | 0.13534205526673  | -1.34710404170084 |
| H | -5.39486047623581 | 0.60839693472981  | -1.34958022634912 |
| C | -3.26883987752910 | 0.89321183544367  | -1.04730134042329 |
| H | -3.34537915203938 | 1.96743901921703  | -0.81308774799894 |
| C | 2.97173970019899  | -1.94677760857624 | -0.32395244566917 |
| H | 3.75418465715630  | -2.72491060886618 | -0.31283507750765 |
| C | 2.26597782047500  | 0.32695904373900  | 0.01664063250895  |
| C | -2.93896204247396 | -1.76843325183441 | -1.60977257794897 |
| H | -2.77288082231765 | -2.83959083352711 | -1.82370907765521 |
| C | 4.74499130623370  | 2.03744184826239  | 1.43511747265402  |
| H | 5.13991800204270  | 1.01357425244967  | 1.36963162302030  |
| C | 1.28899943937367  | 2.52869405490982  | 0.12422708541296  |
| C | 2.99844125405147  | 3.72739750266014  | 1.10544704822600  |
| C | 5.04666389805595  | 4.36704256231287  | 2.18113580927176  |
| H | 5.68367984017615  | 5.12873933084006  | 2.66297955856902  |

|   |                   |                   |                   |
|---|-------------------|-------------------|-------------------|
| C | 3.76863515376463  | 4.72965104688940  | 1.71243867331405  |
| H | 3.38629918695467  | 5.75885580039350  | 1.82254235978555  |
| C | 5.52148974559496  | 3.04407984486150  | 2.04542394519802  |
| H | 6.52417998928600  | 2.78491246290664  | 2.42702242804586  |
| C | 1.67080764875408  | -2.27323527290961 | -0.71699752698741 |
| H | 1.41219443066540  | -3.30346950347577 | -1.01769326628803 |
| C | -4.22454055453031 | -1.23146152760928 | -1.64970321470747 |
| H | -5.08560062673097 | -1.87297025790203 | -1.90578495231168 |
| C | 0.68984995392448  | -1.24591421118664 | -0.74572180101750 |
| H | -0.65326778350600 | -2.55973394872531 | -1.46911769760189 |
| O | 0.18615346227335  | 1.47155171433546  | -2.61850631739632 |
| C | -0.26979112556824 | 2.66952683713592  | -2.69349108003271 |
| C | 0.69556724670603  | 3.85411373869772  | -2.73191629942894 |
| C | -1.63099992762088 | 2.92998026944181  | -3.33709442559534 |
| P | -0.99014424462642 | 1.69633984823410  | 1.70977043924214  |
| C | 0.36058389214916  | 1.00420930873374  | 2.79389534764416  |
| C | -2.56326053846559 | 0.77187851172151  | 2.06499755860249  |
| C | -1.32007160736231 | 3.33811272329410  | 2.50532301448646  |
| C | 0.64025157607876  | -0.38232272984947 | 2.83682697790557  |
| C | 1.26673016287862  | 1.89374653236008  | 3.42252531540840  |
| C | -3.74694308513941 | 1.48547859466543  | 2.37052816498497  |
| C | -2.64769692564428 | -0.62927953211074 | 1.87686556492000  |
| C | -1.43930207641899 | 4.52062260900745  | 1.74433653757282  |
| C | -1.49784756794907 | 3.39911312976023  | 3.91044932573691  |
| C | 1.78421237202042  | -0.86481532105972 | 3.49767631304351  |

|   |                   |                   |                   |
|---|-------------------|-------------------|-------------------|
| H | -0.02948648665946 | -1.10999102995119 | 2.35333475470357  |
| C | 2.41460828605786  | 1.40973411692289  | 4.07557850377095  |
| H | 1.08423682965439  | 2.98089474186979  | 3.40409337629789  |
| C | -4.97546192384917 | 0.81124083285504  | 2.50534708104009  |
| H | -3.71879319647542 | 2.58017146431344  | 2.50186883528581  |
| C | -3.87367204067102 | -1.30036008491254 | 2.01867343758502  |
| H | -1.75806750885148 | -1.21476195909212 | 1.59463923407463  |
| C | -1.70959613475178 | 5.75124449835303  | 2.37535262927529  |
| H | -1.34333681667738 | 4.45656033025718  | 0.64365555288295  |
| C | -1.76904920083698 | 4.62761420430646  | 4.53716727028338  |
| H | -1.42437991931370 | 2.48083604753353  | 4.52038466021141  |
| C | 2.67896745502734  | 0.02871819390204  | 4.11585157200368  |
| H | 1.97665605011586  | -1.95200570910597 | 3.52575386491626  |
| H | 3.10784656002320  | 2.12418404528878  | 4.55338913907792  |
| C | -5.04357407916964 | -0.58261875617812 | 2.33368161781732  |
| H | -5.88667007401088 | 1.38621672487503  | 2.74873715853237  |
| H | -3.91585872272071 | -2.39469466924203 | 1.87551194940244  |
| C | -1.86956623658955 | 5.80752796781558  | 3.77224172016183  |
| H | -1.80471517785998 | 6.66977968513407  | 1.76893941771923  |
| H | -1.90517740379766 | 4.66401752259061  | 5.63262267786572  |
| H | 3.57928396754009  | -0.35131107851034 | 4.63023570182723  |
| H | -6.00719634272561 | -1.11081523007789 | 2.44359790777350  |
| H | -2.08157483051107 | 6.77152093406654  | 4.26794621021379  |
| H | 1.07236637397312  | 4.56202324805276  | 0.59672855905857  |
| H | -2.11637683387301 | 3.84795923858272  | -2.94197352747100 |

|   |                   |                  |                   |
|---|-------------------|------------------|-------------------|
| H | -2.31596040739725 | 2.06568593288076 | -3.23297276066116 |
| H | -1.46107848048201 | 3.09212238169253 | -4.42950226162775 |
| H | 0.28749643233209  | 4.74716065637051 | -2.21038352470600 |
| H | 0.84021091512047  | 4.14544867311348 | -3.80087615681285 |
| H | 1.68757498655691  | 3.59005136640833 | -2.31460419362167 |

---

## 2-PPh3

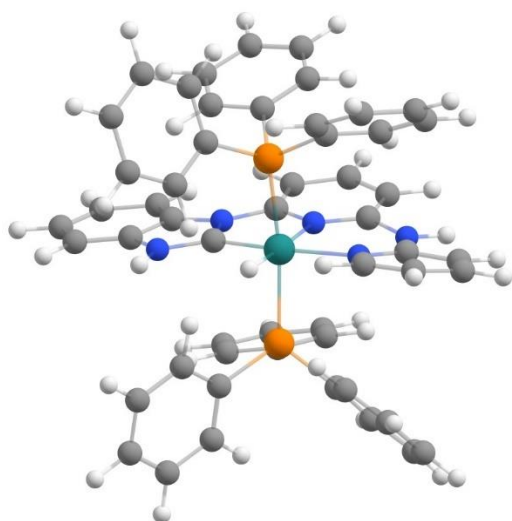

|    |                   |                   |                   |
|----|-------------------|-------------------|-------------------|
| Ru | -0.66615693220919 | 2.01617830058135  | -0.35970861685131 |
| H  | -0.94067151032396 | 3.60578299815805  | -0.04058496818992 |
| P  | -0.02141183431757 | 2.71272931269577  | -2.50772797316628 |
| P  | -1.23092249768987 | 1.63840553571054  | 1.89299045591055  |
| N  | -2.31487210486915 | -0.52669734264628 | -1.68825411633443 |
| N  | 2.23619528481702  | 2.81467514920303  | 0.47214275136622  |
| N  | -2.70207146109587 | 1.74904761106294  | -0.95908237313995 |
| N  | 1.86187140922743  | 0.69353198801905  | 0.02018787316725  |
| N  | -0.20517232665191 | -0.01121137087604 | -0.70821354732935 |

|   |                   |                   |                   |
|---|-------------------|-------------------|-------------------|
| C | 0.86666858382224  | 4.33427532181858  | -2.66139812935857 |
| C | -0.36076200413780 | 0.13340711234089  | 2.55664207986288  |
| C | -1.33474143410224 | 2.92669136335255  | -3.79661210802467 |
| C | 1.49522933354421  | 4.67897125182260  | -3.88213956661417 |
| C | 3.24035857124574  | 0.79084616228934  | 0.30696069924992  |
| C | -3.13205352342960 | 0.60676634959593  | -1.55660028877860 |
| C | 1.47960498638735  | -1.73400288803465 | -0.39753974469980 |
| C | 1.19904852225044  | 1.48908326597403  | -3.17164853804186 |
| C | -3.04422673666586 | 1.41413303727411  | 2.19982785179876  |
| C | -4.94851838665485 | 2.66978991265881  | -1.15282828885100 |
| C | -0.74760063734374 | 2.91967846834652  | 3.13923961555550  |
| C | 1.51440651640313  | 6.50346839641807  | -1.73556392651023 |
| C | -3.61669973784275 | 2.74101529543923  | -0.74523832715252 |
| C | -3.77927572364398 | 2.39188785882667  | 2.91041928791454  |
| C | 0.56134043229731  | -2.69191935328682 | -0.86205655555821 |
| C | 1.06409834977433  | -0.39511011400303 | -0.36179204336647 |
| C | -4.45896358080094 | 0.48530237472513  | -2.05353797889877 |
| C | 4.30968241126129  | -0.12182078610355 | 0.31759460300179  |
| C | -0.92992463077100 | -1.15988985944585 | 2.57236979927821  |
| C | 0.87037739896497  | 5.25831194770801  | -1.59512902755345 |
| C | 1.22794298388279  | 1.96339647846352  | 0.10638031379595  |
| C | 1.68640022704595  | -0.80043889630099 | -3.90425253887044 |
| C | 2.15697581632938  | 6.83263236503762  | -2.94345923747573 |
| C | 3.47097310815460  | 2.16675427999978  | 0.60106403135248  |
| C | -0.11045537421719 | 5.21570585848131  | 3.69080020212340  |

|   |                   |                   |                   |
|---|-------------------|-------------------|-------------------|
| C | 5.80693014431982  | 1.73232744916285  | 0.94699446597081  |
| C | 0.76012200765570  | 0.21964766416091  | -3.62459233843439 |
| C | 2.14194311897661  | 5.91957464609376  | -4.01768908016981 |
| C | 1.00403190334033  | 0.27876990922094  | 2.91128822074144  |
| C | 3.50998490963403  | 0.67512686057995  | -3.25678646251253 |
| C | 4.74396855658905  | 2.65678173580867  | 0.92570700910125  |
| C | -5.14773896023534 | 0.26343380630596  | 1.68023185988333  |
| C | 5.59070259276104  | 0.36999319403324  | 0.64443693422739  |
| C | -2.40104072583017 | 2.51423022856277  | -5.95827772702983 |
| C | -0.45208386395610 | 4.23920818062902  | 2.73490530257229  |
| C | 2.58632313088226  | 1.70269030220392  | -2.98983234738239 |
| C | -0.71360884511370 | -2.29780378126137 | -1.28575844325785 |
| C | -3.42074665843966 | 4.06717327031345  | -4.38436972939513 |
| C | -2.37231776956355 | 3.83658853773399  | -3.47854574566798 |
| C | 1.21123863399872  | -2.12932850847732 | 3.23802613214458  |
| C | -0.70700139373901 | 2.58887739444360  | 4.51604179259371  |
| C | -5.37160590502848 | 1.52095520945299  | -1.85087149227856 |
| C | 1.78208204985951  | -0.84145440065187 | 3.24962944876094  |
| C | -5.18135739176641 | 2.30298080121484  | 3.00509192120117  |
| C | -0.06143581418471 | 4.87978212397615  | 5.05664478539073  |
| C | -0.14799622607468 | -2.28139357313751 | 2.90870707666817  |
| C | 3.06437411106883  | -0.57870321385269 | -3.71530339130339 |
| C | -3.44434014961967 | 3.39700435401140  | -5.62348804560559 |
| C | -3.74964760863747 | 0.35456670006953  | 1.57571627391214  |
| C | -5.86994609236190 | 1.24003395252882  | 2.39312337840821  |



|   |                   |                   |                   |
|---|-------------------|-------------------|-------------------|
| C | -1.34719028518380 | 2.28057943503671  | -5.05299096268168 |
| C | -1.06499002967087 | -0.92695362658519 | -1.20253901199946 |
| C | -0.36349038002098 | 3.56542502449448  | 5.46716966337246  |
| H | 2.07589191579519  | 3.81897248274743  | 0.58958340750936  |
| H | 1.47921837647659  | 3.97504695303862  | -4.73389965233897 |
| H | 2.47785258704385  | -2.03375778035850 | -0.05687817764437 |
| H | -5.63374436794082 | 3.50612840101676  | -0.94001460463222 |
| H | 1.50623851639178  | 7.22495082845090  | -0.89860235088390 |
| H | -3.21889149560758 | 3.62445271417223  | -0.22012632112877 |
| H | -3.25637142565379 | 3.23492476549114  | 3.39341096763813  |
| H | 0.84791239574808  | -3.75680019918602 | -0.89528161841076 |
| H | -4.76617963237504 | -0.43911253250662 | -2.57482489916529 |
| H | 4.18402207894335  | -1.18494649824664 | 0.06747286019743  |
| H | -1.99746728541764 | -1.30546994923569 | 2.34310503135432  |
| H | 0.33264201212036  | 4.99213001337917  | -0.66588727315899 |
| H | 1.32644050585211  | -1.78067406327186 | -4.26410199681369 |
| H | 2.66298969640970  | 7.80819316267860  | -3.05473084116735 |
| H | 0.11592220843554  | 6.24719937630022  | 3.36585796374652  |
| H | 6.82345229697791  | 2.08089290536520  | 1.19868129813424  |
| H | -0.31768793511022 | 0.01827867907797  | -3.75061832345708 |
| H | 2.63309933607137  | 6.17975933208246  | -4.97228703884693 |
| H | 1.46479926282115  | 1.28240034851922  | 2.93754812814833  |
| H | 4.58788828356577  | 0.86016707661221  | -3.10351004945244 |
| H | 4.90661586286425  | 3.72488409984718  | 1.14997470847006  |
| H | -5.67903411149571 | -0.57359568369131 | 1.19321252214536  |

|   |                   |                   |                   |
|---|-------------------|-------------------|-------------------|
| H | 6.44281990461683  | -0.33144373853146 | 0.65851442777420  |
| H | -2.39834676956785 | 2.00644797441812  | -6.93947159979401 |
| H | -0.50882957902521 | 4.48738220766804  | 1.65929653339265  |
| H | 2.95427375744561  | 2.67753599526872  | -2.62514073920645 |
| H | -1.43728220224338 | -3.03875215696191 | -1.66805734855040 |
| H | -4.22257767807438 | 4.78075397114519  | -4.12351313833734 |
| H | -2.34356355834688 | 4.38558283075860  | -2.52080522940907 |
| H | 1.82174965735271  | -3.01079555209044 | 3.50315082991588  |
| H | -0.94272793166528 | 1.56178214051978  | 4.84789711177781  |
| H | -6.40669583565546 | 1.42801711731372  | -2.22279386201186 |
| H | 2.84223953839104  | -0.70390002250377 | 3.52752089590421  |
| H | -5.73834980812158 | 3.07458053142805  | 3.56607440647771  |
| H | 0.20946821282343  | 5.64428255461067  | 5.80658194317217  |
| H | -0.61288882641397 | -3.28338354740625 | 2.92145217105926  |
| H | 3.79049417180142  | -1.38304053511084 | -3.92879484986141 |
| H | -4.26884268692315 | 3.57704518679213  | -6.33605449189356 |
| H | -3.21062807383991 | -0.40446200382956 | 0.98472059690484  |
| H | -6.96952558190224 | 1.17149555280866  | 2.47032161395271  |
| H | -0.52501448297131 | 1.60595697211613  | -5.34516237414421 |
| H | -0.33241824710086 | 3.29873560248458  | 6.53866918852863  |
| H | -2.81523962079588 | -1.30130657455931 | -2.13581098273645 |

---

**2a-PPh3**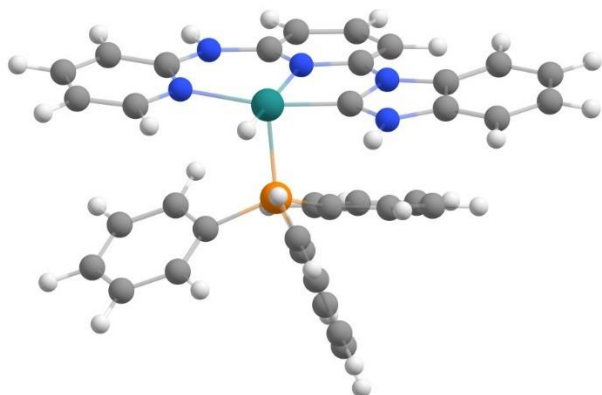

|    |                   |                   |                   |
|----|-------------------|-------------------|-------------------|
| Ru | -0.72049356276473 | 2.02676425483346  | -0.19232853371342 |
| H  | -1.03665648701701 | 3.58324828291489  | 0.20719632094725  |
| P  | -1.20146903684806 | 1.63847800873004  | 1.92784101413615  |
| N  | -2.22560164266758 | -0.51276238629191 | -1.71130677059375 |
| N  | 2.07719700221014  | 2.90307367583854  | 0.85203481311085  |
| N  | -2.64596180479742 | 1.78919143603051  | -1.06601933472467 |
| N  | 1.90765948048778  | 0.87269993148493  | 0.01136182999915  |
| N  | -0.10198552521513 | 0.10532082644120  | -0.82439580777597 |
| C  | -0.36633331961846 | 0.07779017972005  | 2.49739485075693  |
| C  | 3.25267233399946  | 1.01327754451206  | 0.42301084302868  |
| C  | -3.03821801715557 | 0.62735381248828  | -1.66513597410856 |
| C  | 1.69405657941354  | -1.52173905523744 | -0.64798845593213 |
| C  | -3.02737643124755 | 1.47196471143270  | 2.18521752743180  |

|   |                   |                   |                   |
|---|-------------------|-------------------|-------------------|
| C | -4.84250803958748 | 2.74298886897083  | -1.51971409330947 |
| C | -0.68806823730204 | 2.85804740812449  | 3.22516435511534  |
| C | -3.55263420856067 | 2.81611022092246  | -0.99934146220786 |
| C | -3.72811714920562 | 2.44331295286042  | 2.93795638355866  |
| C | 0.83073422598345  | -2.50413562307650 | -1.17412837257117 |
| C | 1.19495103244460  | -0.22135263634407 | -0.50277559821026 |
| C | -4.33330265596010 | 0.49316550367637  | -2.24144222103909 |
| C | 4.38805438120815  | 0.18503086956882  | 0.37457419170094  |
| C | -0.96410878145664 | -1.19871628027909 | 2.39357607359519  |
| C | 1.16255366328104  | 2.05703338673954  | 0.28538211851949  |
| C | 3.34733469308447  | 2.32639288032197  | 0.97177784194938  |
| C | -0.08964646361452 | 5.13278313584427  | 3.89613966786500  |
| C | 5.67198852076656  | 1.98493066386254  | 1.46486321869459  |
| C | 0.99598338326680  | 0.16332229445157  | 2.88003613941676  |
| C | 4.54556332457748  | 2.82954749699369  | 1.49940054704527  |
| C | -5.16644243458173 | 0.43222706048819  | 1.59156097093180  |
| C | 5.59252023390177  | 0.68982643137086  | 0.90722999879394  |
| C | -0.43899777021631 | 4.20828365149894  | 2.89291750193120  |
| C | -0.47659580786457 | -2.17317550564797 | -1.54063353418162 |
| C | 1.14774319695844  | -2.26771754946021 | 2.99699954564524  |
| C | -0.60229168696842 | 2.44629064177105  | 4.57725963462334  |
| C | -5.23781818059687 | 1.55111240041469  | -2.16509022270336 |
| C | 1.74586663751872  | -0.99907187349617 | 3.12712596902638  |
| C | -5.13354374043772 | 2.40580676451096  | 3.01529745063333  |
| C | 0.00875231139098  | 4.71583983853905  | 5.23744417837747  |

|   |                   |                   |                   |
|---|-------------------|-------------------|-------------------|
| C | -0.21002522694702 | -2.36190289170793 | 2.63999421255415  |
| C | -3.76501705218009 | 0.46990561197834  | 1.50651671485079  |
| C | -5.85635138444532 | 1.40272585683861  | 2.34466789468394  |
| C | -0.91708469131688 | -0.83710426935363 | -1.34760098392839 |
| C | -0.25311467757984 | 3.37329945565813  | 5.57582428843937  |
| H | 1.80898214592326  | 3.83297541024578  | 1.18938006341918  |
| H | 2.71388525329864  | -1.78395272639800 | -0.33952678724715 |
| H | -5.52367482324013 | 3.60411111986008  | -1.42399061368765 |
| H | -3.18201838901295 | 3.71796283725558  | -0.48590687098121 |
| H | -3.17777589155838 | 3.24064853087626  | 3.46541110378666  |
| H | 1.19125700234484  | -3.53975209948408 | -1.29625660476155 |
| H | -4.61788306677271 | -0.45227816546547 | -2.73739524010303 |
| H | 4.37237510542398  | -0.82018873322730 | -0.07164973280931 |
| H | -2.03153555933058 | -1.30067688326954 | 2.14098094105773  |
| H | 0.10006899613280  | 6.18773854519998  | 3.62837114810706  |
| H | 6.63222477898822  | 2.34522902191299  | 1.87245279725036  |
| H | 1.47803745058544  | 1.14942898417676  | 2.99851088352175  |
| H | 4.60280812764766  | 3.84718061856498  | 1.92202464943901  |
| H | -5.72560092882128 | -0.35909702820654 | 1.06133506399826  |
| H | 6.49421485729707  | 0.05393946110744  | 0.88000342881299  |
| H | -0.54431858101215 | 4.52373604557570  | 1.83768338521962  |
| H | -1.15660854082963 | -2.93401804229419 | -1.96188687353397 |
| H | 1.73581424403318  | -3.18212326691833 | 3.19169423784413  |
| H | -0.80868083253060 | 1.39735519686624  | 4.85548721759280  |
| H | -6.24607436190864 | 1.44938314495102  | -2.60310104007868 |

|   |                   |                   |                   |
|---|-------------------|-------------------|-------------------|
| H | 2.80477214342657  | -0.91021114648226 | 3.42837237557793  |
| H | -5.66595937868518 | 3.17168511012739  | 3.60684042005631  |
| H | 0.28461707464217  | 5.44024561504033  | 6.02431484976485  |
| H | -0.69529039711600 | -3.35107086681079 | 2.56155857867595  |
| H | -3.24830297257360 | -0.28104693674777 | 0.88695948727478  |
| H | -6.95864265761928 | 1.37606425685204  | 2.40742889932654  |
| H | -0.18660859002098 | 3.04385038800109  | 6.62800109801979  |
| H | -2.70743919305170 | -1.30337638024704 | -2.15232159790587 |

---

### 1'-PPh3

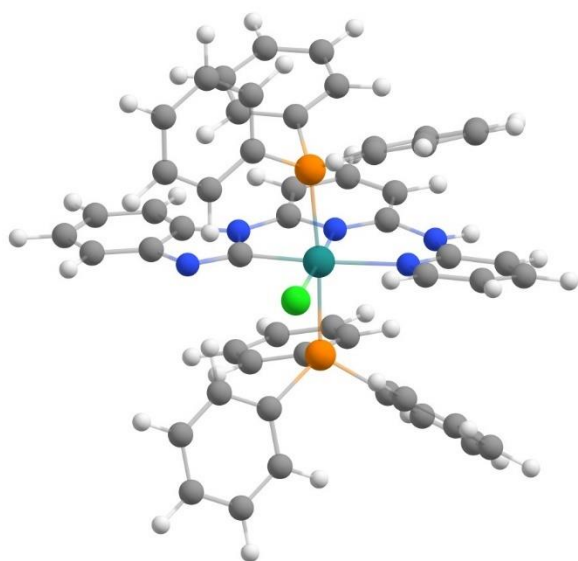

|    |                   |                   |                   |
|----|-------------------|-------------------|-------------------|
| Ru | -0.69734635715882 | 2.11042376945830  | -0.36457296665808 |
| Cl | -1.24929445431884 | 4.46997053781487  | 0.05213408255883  |
| P  | -0.04520915313433 | 2.72250518981482  | -2.55396288453950 |
| P  | -1.22702106150670 | 1.62225048199063  | 1.88233072326972  |
| N  | -2.24310204254095 | -0.46507170716730 | -1.71121838781219 |
| N  | 2.10903843052701  | 3.07960102696432  | 0.61444851120210  |
| N  | -2.76411298381546 | 1.76603374581440  | -0.97751262167249 |

|   |                   |                   |                   |
|---|-------------------|-------------------|-------------------|
| N | 1.88409458041202  | 0.89291646499668  | 0.04469883026355  |
| N | -0.16860675501851 | 0.16386133625999  | -0.69265905806843 |
| C | 0.82503869337251  | 4.33092371155385  | -2.87390782587879 |
| C | -0.40243130123442 | 0.05341994319638  | 2.46431997644732  |
| C | -1.43857682088785 | 2.84256835065367  | -3.77184512274020 |
| C | 0.90016395463189  | 4.81375499178006  | -4.20292444522234 |
| C | 3.22718282299739  | 1.03971855337263  | 0.42197424513845  |
| C | -3.12774352735201 | 0.61061117746437  | -1.58748852618571 |
| C | 1.58833890143865  | -1.51655250348036 | -0.42608541774416 |
| C | 1.16843613712671  | 1.48616375081671  | -3.21146466186906 |
| C | -3.05652322223246 | 1.47678681580280  | 2.13659246077788  |
| C | -5.05339713012890 | 2.56165734503161  | -1.20996253414421 |
| C | -0.71425601039578 | 2.74459471935812  | 3.26605749153476  |
| C | 2.14212598378757  | 6.24112892753967  | -2.12635828049554 |
| C | -3.73512126164145 | 2.70227819370337  | -0.77224469613129 |
| C | -3.75895505187022 | 2.57924861097232  | 2.68122274897652  |
| C | 0.70685856902892  | -2.50713413864774 | -0.87986178272492 |
| C | 1.13147788523794  | -0.18800007436417 | -0.35960540018465 |
| C | -4.43425061460776 | 0.41714237739347  | -2.11512785123356 |
| C | 4.33919761270537  | 0.18231436518680  | 0.47878427645575  |
| C | -0.95768635749134 | -1.24299532340828 | 2.38278435924678  |
| C | 1.44865545332853  | 5.05049845967315  | -1.83114726635784 |
| C | 1.22585601000881  | 2.19307975628172  | 0.16959519385154  |
| C | 1.71715110224283  | -0.79542131801623 | -3.92423455403315 |
| C | 2.21410464559434  | 6.72217426363191  | -3.44621349214568 |

|   |                   |                   |                   |
|---|-------------------|-------------------|-------------------|
| C | 3.33270797581490  | 2.42974106612292  | 0.77736930762375  |
| C | 0.51411480042828  | 4.65825161238588  | 4.14146253068340  |
| C | 5.67766515807833  | 2.09036406399368  | 1.27823941170224  |
| C | 0.76319444668832  | 0.19804007141674  | -3.63980643931547 |
| C | 1.59213527742179  | 6.00373780807815  | -4.48683749101978 |
| C | 0.94684219704775  | 0.18624746226102  | 2.88151812358385  |
| C | 3.50164897468804  | 0.74437240364601  | -3.32209786739525 |
| C | 4.56617058482297  | 2.95331402010084  | 1.21077723640542  |
| C | -5.20946206050387 | 0.41100414577443  | 1.63290332450600  |
| C | 5.56673497201321  | 0.72851541097130  | 0.91530712656821  |
| C | -2.69071568926318 | 2.25383272478656  | -5.78963963682297 |
| C | 0.09720860227624  | 3.87663240479905  | 3.04442722293572  |
| C | 2.55107475537530  | 1.74681070095288  | -3.05787792146878 |
| C | -0.58567819266104 | -2.15181586764198 | -1.28282470155278 |
| C | -3.57453543591999 | 3.93130874831154  | -4.26305971891703 |
| C | -2.45072856778180 | 3.77590209440351  | -3.43525963680626 |
| C | 1.15859486583537  | -2.23406264326472 | 3.09428933819226  |
| C | -1.09286944324891 | 2.39635108088769  | 4.58710003683676  |
| C | -5.40514036776357 | 1.40178571621025  | -1.92671055142416 |
| C | 1.71948485703405  | -0.94580719470626 | 3.18922682688741  |
| C | -5.16581513527591 | 2.58716088277243  | 2.71439906980252  |
| C | 0.12708902837075  | 4.32075145289631  | 5.45026140738477  |
| C | -0.18358808148932 | -2.37584849254454 | 2.69962623780331  |
| C | 3.08935041438151  | -0.52852358244842 | -3.75945084996126 |
| C | -3.70559477703997 | 3.16192199811571  | -5.43651778245668 |



|   |                   |                   |                   |
|---|-------------------|-------------------|-------------------|
| C | -3.80486937154146 | 0.40548933991571  | 1.58863247941629  |
| C | -5.89695236864965 | 1.50086540505323  | 2.20018509311254  |
| C | -1.55814889814523 | 2.09695839681603  | -4.96549566963882 |
| C | -0.98469835483936 | -0.79505390924972 | -1.19738187705919 |
| C | -0.67874402855487 | 3.18469417204688  | 5.67305804598445  |
| H | 0.41181675211288  | 4.26007397748692  | -5.02459716938900 |
| H | 2.60728471072928  | -1.76831552360622 | -0.10797348451850 |
| H | -5.78297435778135 | 3.36171481717845  | -1.00329611838875 |
| H | 2.62876306679283  | 6.79760707534897  | -1.30508809452071 |
| H | -3.38611646053332 | 3.61398273602728  | -0.25275566342354 |
| H | -3.19996128733736 | 3.44676392682068  | 3.07119205236637  |
| H | 1.03206268862945  | -3.56066236519382 | -0.92351952616245 |
| H | -4.67393154242273 | -0.51895326315010 | -2.65143624142505 |
| H | 4.29115759631368  | -0.87883176190409 | 0.18722825887789  |
| H | -2.00839901896452 | -1.39087874662519 | 2.08985844750244  |
| H | 1.41663206079678  | 4.67770636515175  | -0.79406905331938 |
| H | 1.38095078254738  | -1.79354815225785 | -4.25795414729641 |
| H | 2.75559561482036  | 7.65997957130766  | -3.66799423846668 |
| H | 1.15320296215726  | 5.54128350806883  | 3.96134287573543  |
| H | 6.65378924858377  | 2.48341218522012  | 1.61545508582176  |
| H | -0.30838526361580 | -0.04295759861599 | -3.73840363267580 |
| H | 1.64341935292089  | 6.37292282054150  | -5.52727508755403 |
| H | 1.40288440232067  | 1.18802618101098  | 2.96736510319415  |
| H | 4.57446782237973  | 0.96298039444464  | -3.17708298032308 |
| H | 4.64199451598325  | 4.02008689543598  | 1.48406724584590  |

|   |                   |                   |                   |
|---|-------------------|-------------------|-------------------|
| H | -5.77164675801652 | -0.43770078488148 | 1.20368157820154  |
| H | 6.45531201777594  | 0.07429342109774  | 0.96822700315841  |
| H | -2.77192677900546 | 1.66582735118339  | -6.72209858087550 |
| H | 0.41446757579485  | 4.14064382906787  | 2.02357924316955  |
| H | 2.89019236381808  | 2.73732660723045  | -2.70837521537825 |
| H | -1.29354415424403 | -2.90897150395170 | -1.66345534223914 |
| H | -4.35723680407443 | 4.66044749173059  | -3.98659388672990 |
| H | -2.34083397019666 | 4.38442800950500  | -2.51778666547480 |
| H | 1.76572904807656  | -3.12534626082276 | 3.33488992490033  |
| H | -1.71370747941657 | 1.49945541592112  | 4.76659384836207  |
| H | -6.42571370518702 | 1.25871552439917  | -2.32336855029762 |
| H | 2.77041595455560  | -0.81408743227809 | 3.50255816187291  |
| H | -5.69320917069481 | 3.45761822426456  | 3.14471344068176  |
| H | 0.45688314956463  | 4.93989215664782  | 6.30449423739491  |
| H | -0.64031470083461 | -3.37989092747746 | 2.63327025412435  |
| H | 3.83710240296101  | -1.31515580760437 | -3.96624823991929 |
| H | -4.59353601556120 | 3.28140245363365  | -6.08336890275048 |
| H | -3.29672250065343 | -0.43365491847685 | 1.08653752930433  |
| H | -7.00134915021549 | 1.50816486360685  | 2.22857560274496  |
| H | -0.75728679989579 | 1.40470055437976  | -5.27448700653324 |
| H | -0.98080449243941 | 2.90842349315481  | 6.69955749901295  |
| H | -2.68388649324766 | -1.26863809732665 | -2.16829736408219 |

---

**1a'-PPh3**

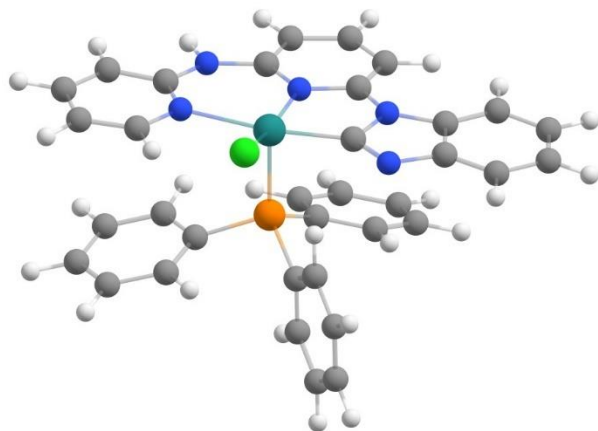

|    |                   |                   |                   |
|----|-------------------|-------------------|-------------------|
| Ru | -0.69576716398366 | 2.06007292054878  | -0.21358664316582 |
| Cl | -1.02611317066742 | 4.40242944133302  | -0.26747518660990 |
| P  | -1.18599581976430 | 1.54786201487368  | 1.87315583731424  |
| N  | -2.21478845043497 | -0.57509234809248 | -1.51546519633041 |
| N  | 2.04301645736747  | 3.08517378490752  | 0.85051779473418  |
| N  | -2.69803281196381 | 1.73151745471164  | -1.01519070734600 |
| N  | 1.93206389538132  | 0.93315059007138  | 0.11292517669092  |
| N  | -0.09507263145024 | 0.15587234310707  | -0.66399101891108 |
| C  | -0.35272372049088 | -0.01778475274770 | 2.44203421211184  |
| C  | 3.24912022223711  | 1.10265860372996  | 0.56848691361634  |
| C  | -3.08382348663623 | 0.51791321310642  | -1.48811539453757 |
| C  | 1.77053609596744  | -1.42994692571310 | -0.59412491635233 |
| C  | -3.02730755553738 | 1.44818503556625  | 2.09996991290715  |
| C  | -4.96393498348948 | 2.55137701593979  | -1.36400829523058 |
| C  | -0.70646604032541 | 2.69937139503889  | 3.24515631057037  |
| C  | -3.63980290229417 | 2.71869967378467  | -0.95442435136789 |
| C  | -3.69185589935180 | 2.60926834123613  | 2.56573290194659  |
| C  | 0.93821439971956  | -2.42973297995121 | -1.11920634021529 |
| C  | 1.23581681366140  | -0.14582406188733 | -0.38348748666281 |

|   |                   |                   |                   |
|---|-------------------|-------------------|-------------------|
| C | -4.40783102362012 | 0.27956036810613  | -1.95388922005939 |
| C | 4.38222645490831  | 0.27546938542497  | 0.65633939001151  |
| C | -0.84674600721277 | -1.32192771929521 | 2.21078599145410  |
| C | 1.21297938443064  | 2.19832504318138  | 0.32034406258692  |
| C | 3.28140085622998  | 2.46956401639901  | 1.01882651444575  |
| C | 0.24969002625214  | 4.76783038812279  | 4.10121050505084  |
| C | 5.59896404225249  | 2.17084447788288  | 1.65673022674997  |
| C | 0.96647554583881  | 0.12851939687519  | 2.94095922374946  |
| C | 4.46646370514321  | 3.00238123529433  | 1.56384932895682  |
| C | -5.21250036975980 | 0.42440110494771  | 1.66655018380930  |
| C | 5.55738673797307  | 0.82988788497105  | 1.21018924005125  |
| C | -0.08177672823861 | 3.94023807215836  | 3.00837082897527  |
| C | -0.39206576558261 | -2.13054365727156 | -1.43269137613617 |
| C | 1.26479066001095  | -2.29190974515678 | 2.96069149777747  |
| C | -0.99847115040277 | 2.29252785513754  | 4.57145928687836  |
| C | -5.35522752774563 | 1.30173914416106  | -1.88634856178964 |
| C | 1.76742096216680  | -0.99784418573403 | 3.19485064634672  |
| C | -5.09680589163140 | 2.66878244331693  | 2.59241637776778  |
| C | -0.03948959722559 | 4.36657617340715  | 5.41727387309424  |
| C | -0.04611671586354 | -2.44867910289820 | 2.47472289152851  |
| C | -3.80839105591692 | 0.36496688273782  | 1.63224959435131  |
| C | -5.86334971341821 | 1.57501170774426  | 2.14989533069155  |
| C | -0.87793788339433 | -0.82027349248269 | -1.19268900725590 |
| C | -0.66677705627281 | 3.12494963521136  | 5.65254945932760  |
| H | 2.81775912110855  | -1.64187449121342 | -0.34479449082441 |

|   |                   |                   |                   |
|---|-------------------|-------------------|-------------------|
| H | -5.67312005815617 | 3.39077324172825  | -1.27453688389244 |
| H | -3.26066887668397 | 3.68246926981762  | -0.56561399746413 |
| H | -3.10411095273036 | 3.48114429388357  | 2.90060159758346  |
| H | 1.33292176548380  | -3.44640471646229 | -1.28771006399089 |
| H | -4.67940652910458 | -0.71689828327136 | -2.34770969740820 |
| H | 4.38838614372056  | -0.77198370376847 | 0.31456635583287  |
| H | -1.86574918898309 | -1.48188173312217 | 1.82679801378747  |
| H | 0.74511299031383  | 5.73678502654561  | 3.91137124080185  |
| H | 6.53644265463801  | 2.57040249788283  | 2.08381403673738  |
| H | 1.37853823957889  | 1.13613538051643  | 3.12468462593150  |
| H | 4.48487547498577  | 4.05102189716904  | 1.90776125378113  |
| H | -5.80274172314027 | -0.43464207549228 | 1.30012222208664  |
| H | 6.45986907320316  | 0.19806107132244  | 1.29202032702182  |
| H | 0.15339254090088  | 4.25594743453842  | 1.97873245876108  |
| H | -1.06361230565080 | -2.89733467672989 | -1.85745866707110 |
| H | 1.89465512715053  | -3.17808708466651 | 3.15725652614761  |
| H | -1.48579871167009 | 1.31798641869924  | 4.75983658354721  |
| H | -6.38910064012514 | 1.12383136903934  | -2.23130633113139 |
| H | 2.79545497547849  | -0.85622552438694 | 3.57261604508465  |
| H | -5.59464174881913 | 3.58394359430002  | 2.96038258658048  |
| H | 0.22503750993171  | 5.02053139310996  | 6.26817422884143  |
| H | -0.45333225409118 | -3.45919744844432 | 2.29092062587648  |
| H | -3.32894287726790 | -0.52969098089466 | 1.20531437592632  |
| H | -6.96689366007372 | 1.62227174660873  | 2.17111699369207  |
| H | -0.89604376856582 | 2.80314765192916  | 6.68456481070818  |

H -2.66368745829775 -1.40805964044326 -1.90782458847273

---

**2'-PPh3**

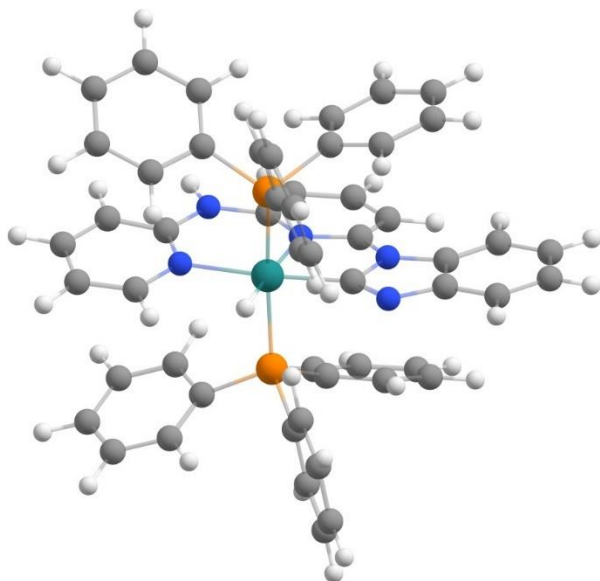

Ru -0.69546317149651 1.97915565247275 -0.38875038132279

H -0.92754359820016 3.57623545834525 -0.04994071180195

P 0.01497659775459 2.73422694195973 -2.47103871992775

P -1.20855989744583 1.64569651146574 1.84778832054185

N -2.42121250755891 -0.49181999132494 -1.73910091134505

N 2.21798386508448 2.72129898775750 0.50300266640037

N -2.73266791018895 1.78797092400858 -0.99833769686952

N 1.79957543463070 0.54745096456309 -0.02697866308298

N -0.29359754001645 -0.05763505920915 -0.75334442883758

C 0.69282286201470 4.45484710868018 -2.62247591344366

|   |                   |                   |                   |
|---|-------------------|-------------------|-------------------|
| C | -0.42130225773708 | 0.10673668880323  | 2.54524737584711  |
| C | -1.27892406091459 | 2.74587097676362  | -3.80295707789152 |
| C | 0.77458143082445  | 5.08237454452263  | -3.88805058525733 |
| C | 3.16723183462400  | 0.60003304705382  | 0.27532240952120  |
| C | -3.20169478256414 | 0.66327232375451  | -1.60424727490353 |
| C | 1.31483574958412  | -1.85393278530005 | -0.43286202152939 |
| C | 1.41800017770453  | 1.69238164074415  | -3.09241954055482 |
| C | -3.03136467659749 | 1.51794330108476  | 2.17920418822481  |
| C | -4.94853748946104 | 2.78643104505800  | -1.20360641380700 |
| C | -0.64437752591830 | 2.90006235948459  | 3.08807821697900  |
| C | 1.71663344037666  | 6.42032186159977  | -1.60014100251395 |
| C | -3.61609246674880 | 2.80942756272718  | -0.78890672426696 |
| C | -3.72290747789377 | 2.55849692586898  | 2.84292404719035  |
| C | 0.36312677580075  | -2.77132001035056 | -0.90189665838149 |
| C | 0.96584260171788  | -0.48815111870256 | -0.40075556542541 |
| C | -4.53009647103838 | 0.59051297371109  | -2.10923125150997 |
| C | 4.21457465723166  | -0.33694900278312 | 0.27296957959322  |
| C | -1.04728447373678 | -1.15917452198034 | 2.59031368374529  |
| C | 1.17106795183029  | 5.12764030897545  | -1.47655292422217 |
| C | 1.24462280484546  | 1.90321630440774  | 0.11318732980423  |
| C | 2.29398020450308  | -0.52408845588689 | -3.67145493039615 |
| C | 1.78254066410700  | 7.04981341318540  | -2.85757204679443 |
| C | 3.39632322765054  | 1.98111495452696  | 0.60572038900249  |
| C | 0.33910808962894  | 5.07195541761511  | 3.60922168400197  |
| C | 5.73896552932650  | 1.47230697520406  | 0.95901517258871  |

|   |                   |                   |                   |
|---|-------------------|-------------------|-------------------|
| C | 1.20475303742990  | 0.33519177602221  | -3.44074787022466 |
| C | 1.31260337852859  | 6.37669963564767  | -4.00311160858524 |
| C | 0.95466285534825  | 0.19590233496879  | 2.87587190090539  |
| C | 3.83369699427117  | 1.29368936335578  | -3.17904486269406 |
| C | 4.69130683295581  | 2.41441811805216  | 0.95190653191278  |
| C | -5.19258040013285 | 0.47551331598640  | 1.65669444234113  |
| C | 5.50485937584631  | 0.11920896637136  | 0.62200095544637  |
| C | -2.38855375926821 | 1.91604296263917  | -5.82257013960670 |
| C | -0.09634198289518 | 4.12630530504444  | 2.66023407696672  |
| C | 2.74757976184643  | 2.16260431744318  | -2.97096557344242 |
| C | -0.89589929530084 | -2.32541018889045 | -1.33390713647226 |
| C | -3.46156384051874 | 3.63737968798162  | -4.47949681139654 |
| C | -2.37065680827054 | 3.62604054946388  | -3.59543734333298 |
| C | 1.05770289861209  | -2.21429804427270 | 3.23966680850907  |
| C | -0.74759265786783 | 2.62341862206621  | 4.47334095884113  |
| C | -5.40940712610418 | 1.65588330528697  | -1.90815229481056 |
| C | 1.68638065144386  | -0.95380263528541 | 3.21780212856725  |
| C | -5.12921887125321 | 2.55417678693736  | 2.91575771310830  |
| C | 0.23051707892044  | 4.79793171287870  | 4.98486193777288  |
| C | -0.31228227670416 | -2.30972329123575 | 2.93512800826876  |
| C | 3.61239536352197  | -0.05074238960026 | -3.53086166613517 |
| C | -3.48051979603575 | 2.77286283840565  | -5.59219283287902 |
| C | -3.79011086876847 | 0.48407366618013  | 1.57400871394947  |
| C | -5.86954058944037 | 1.51289762297336  | 2.32699441982632  |
| C | -1.29278204572798 | 1.90274699203619  | -4.93642600565324 |



|   |                   |                   |                   |
|---|-------------------|-------------------|-------------------|
| C | -1.18488624725055 | -0.94082843388260 | -1.24808886725191 |
| C | -0.31509112950583 | 3.57096134872001  | 5.41666946474273  |
| H | 0.41014999777045  | 4.55916524889230  | -4.79043438733562 |
| H | 2.29957791734426  | -2.18943724547281 | -0.08334234527531 |
| H | -5.60375108993097 | 3.64697398366506  | -0.99112967955423 |
| H | 2.09652073102845  | 6.93737941973876  | -0.70035630069473 |
| H | -3.18587063760511 | 3.67668903794654  | -0.26124885023450 |
| H | -3.15675170363701 | 3.38802604921951  | 3.30051885426318  |
| H | 0.60443406835687  | -3.84818773659863 | -0.93060964690952 |
| H | -4.86328329593636 | -0.32066865454496 | -2.63854625098687 |
| H | 4.06860396110133  | -1.39188591529800 | -0.00890574029637 |
| H | -2.12216843988924 | -1.26239692643211 | 2.37080503765697  |
| H | 1.15153054994790  | 4.61701783391329  | -0.49809306917367 |
| H | 2.10634543380762  | -1.57966175576959 | -3.93869125642838 |
| H | 2.20513758857542  | 8.06715576523444  | -2.94834004594339 |
| H | 0.77554647844107  | 6.02723624588855  | 3.26619071181177  |
| H | 6.76134901129894  | 1.79495463111368  | 1.22734275880812  |
| H | 0.18059534187421  | -0.06971609359690 | -3.50644155357848 |
| H | 1.36505868255542  | 6.86305916219938  | -4.99420429819089 |
| H | 1.46313851243194  | 1.17605672443815  | 2.85903789182200  |
| H | 4.86341184353322  | 1.67120675019156  | -3.04955551142237 |
| H | 4.86428715595977  | 3.47532393056025  | 1.20382756903144  |
| H | -5.76283488741970 | -0.34083905836771 | 1.17797555812680  |
| H | 6.34481872793097  | -0.59849823042190 | 0.62484492448883  |
| H | -2.38056149785261 | 1.25374945790767  | -6.70759419946273 |

|   |                   |                   |                   |
|---|-------------------|-------------------|-------------------|
| H | -0.01249372274446 | 4.31696872353075  | 1.57612433287176  |
| H | 2.93770309541744  | 3.20892156801154  | -2.67845779743166 |
| H | -1.65003809293771 | -3.03339996031401 | -1.72051956025628 |
| H | -4.30544457714023 | 4.32698712394878  | -4.29742919393858 |
| H | -2.35456116553092 | 4.31818749847070  | -2.73488635319208 |
| H | 1.63464239817723  | -3.11965778207124 | 3.50131140872796  |
| H | -1.16568891612910 | 1.65860512430593  | 4.81423817052014  |
| H | -6.44483622287290 | 1.60009961327263  | -2.28719747253356 |
| H | 2.76017366665621  | -0.86003372044807 | 3.45914033076639  |
| H | -5.64941289758851 | 3.37784774391133  | 3.43775861792593  |
| H | 0.57714983196148  | 5.53954867774027  | 5.72751354334556  |
| H | -0.82090547050833 | -3.29046313031848 | 2.96480781147069  |
| H | 4.46787000708065  | -0.73253824523276 | -3.68464274993637 |
| H | -4.34039583612111 | 2.77766538463404  | -6.28615364330975 |
| H | -3.28541178258531 | -0.31330544404083 | 1.00305231625281  |
| H | -6.97294690560960 | 1.51201130578414  | 2.38313570395705  |
| H | -0.43572615438609 | 1.24147930633152  | -5.14756087693695 |
| H | -0.39903243927323 | 3.34993078022156  | 6.49622876292845  |
| H | -2.94081739095555 | -1.24570566624490 | -2.19820218978223 |

---

**2a'-PPh3**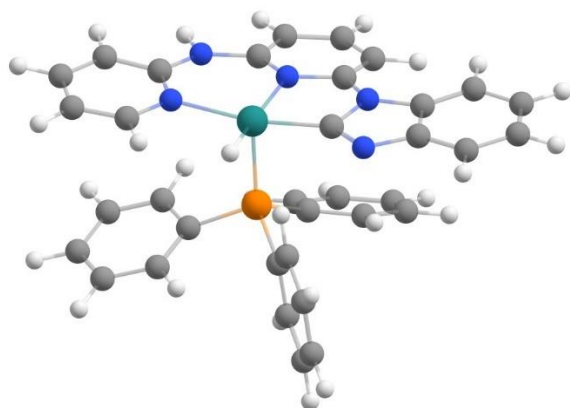

|    |                   |                   |                   |
|----|-------------------|-------------------|-------------------|
| Ru | -0.73130365772985 | 2.04065336660632  | -0.18513682158283 |
| H  | -1.07255256466791 | 3.58554897924709  | 0.26228001400284  |
| P  | -1.19533651618178 | 1.63644452242945  | 1.90470796373612  |
| N  | -2.23663494742505 | -0.50540787508744 | -1.68128739084524 |
| N  | 2.05862542107869  | 2.99546402453975  | 0.83399128532631  |
| N  | -2.66417517656754 | 1.79055392442916  | -1.03686361850004 |
| N  | 1.91228947819522  | 0.87787476060809  | -0.00463010059469 |
| N  | -0.10385758716727 | 0.12559948079373  | -0.81920467917651 |
| C  | -0.36324137106829 | 0.07575919131942  | 2.49835382480001  |
| C  | 3.25031512932645  | 1.03590687158766  | 0.38150545358490  |
| C  | -3.05823867815445 | 0.62562283804898  | -1.63170514288094 |
| C  | 1.68177711102612  | -1.51695662830959 | -0.61701728690824 |
| C  | -3.02989788500450 | 1.46608126221062  | 2.16237414803144  |
| C  | -4.88529964777991 | 2.71621532557693  | -1.44867295576657 |
| C  | -0.69852383240411 | 2.81533290681398  | 3.24629443868177  |

|   |                   |                   |                   |
|---|-------------------|-------------------|-------------------|
| C | -3.58548210291117 | 2.80243689463654  | -0.95140268204763 |
| C | -3.74960781692344 | 2.49467724415579  | 2.81466824564053  |
| C | 0.81291274022160  | -2.50115466465242 | -1.11849690715438 |
| C | 1.19948396000406  | -0.19923464881822 | -0.49184977354299 |
| C | -4.35927124300047 | 0.48030386255828  | -2.19338925474696 |
| C | 4.39461425101483  | 0.22061264863280  | 0.33646415084767  |
| C | -0.93587080531410 | -1.21349019358787 | 2.41809802830771  |
| C | 1.19425015166275  | 2.13761392210087  | 0.30145321466207  |
| C | 3.30621890004015  | 2.37888926783245  | 0.89753009668325  |
| C | 0.22031444264855  | 4.95161429984170  | 3.97635855081596  |
| C | 5.66398229121065  | 2.06625676563419  | 1.36357097087360  |
| C | 1.00003854414958  | 0.19315230724305  | 2.86985237527624  |
| C | 4.52248383106887  | 2.89073419451049  | 1.39242167760142  |
| C | -5.16367183085004 | 0.41637724586205  | 1.55464153832407  |
| C | 5.60181964515711  | 0.75435109435804  | 0.84024396068628  |
| C | -0.14760419674788 | 4.07500252911765  | 2.93626011361189  |
| C | -0.49739672242273 | -2.16904351956190 | -1.48618717017054 |
| C | 1.19939470113213  | -2.23308907468856 | 3.02347294429868  |
| C | -0.87149868111895 | 2.43369546216674  | 4.59896011343334  |
| C | -5.27860805449598 | 1.52546161866325  | -2.09739343227815 |
| C | 1.77387063188077  | -0.95096648044773 | 3.12690776022091  |
| C | -5.15737463680052 | 2.48018182495983  | 2.84030475951205  |
| C | 0.03898897841965  | 4.57683143386678  | 5.32026329046278  |
| C | -0.15873657997292 | -2.35866912770136 | 2.67871135989810  |
| C | -3.75911213842728 | 0.43359170414856  | 1.52179362266192  |

|   |                   |                   |                   |
|---|-------------------|-------------------|-------------------|
| C | -5.86996853731920 | 1.44086725257706  | 2.21474800816869  |
| C | -0.92211095608336 | -0.82587337976523 | -1.31582474987448 |
| C | -0.50830930713989 | 3.31469264477042  | 5.63180029375815  |
| H | 2.69964162946066  | -1.77549993133126 | -0.29678257733593 |
| H | -5.57520713219098 | 3.56777517079852  | -1.32979905141351 |
| H | -3.21327018587222 | 3.70500015007477  | -0.43896796989516 |
| H | -3.20420945370591 | 3.32331878280868  | 3.29817834305500  |
| H | 1.16406967202653  | -3.54314655556129 | -1.21696993390419 |
| H | -4.63794852252007 | -0.46895059503705 | -2.68665232992094 |
| H | 4.38565907683312  | -0.79820782330616 | -0.08375386500431 |
| H | -2.00075792697588 | -1.34086351624445 | 2.16600471564699  |
| H | 0.66214300759654  | 5.93360457949034  | 3.72894840005981  |
| H | 6.62527447353621  | 2.45025859895373  | 1.75028119115491  |
| H | 1.46514790618873  | 1.19161167681314  | 2.94862985164069  |
| H | 4.55912380521935  | 3.91964045599094  | 1.79072767747965  |
| H | -5.71198028636322 | -0.39849990033074 | 1.04841732275797  |
| H | 6.51317391250715  | 0.13019709509838  | 0.81926833327670  |
| H | 0.00827684580294  | 4.34545904886582  | 1.87774410206049  |
| H | -1.18925513932301 | -2.93180832648230 | -1.88493990881195 |
| H | 1.80912283308671  | -3.13354370171289 | 3.21945655677815  |
| H | -1.29157014325104 | 1.44102702015021  | 4.84544935933319  |
| H | -6.29291580520663 | 1.41280997511327  | -2.51883622680786 |
| H | 2.83717553264237  | -0.83518666903237 | 3.40276059682713  |
| H | -5.70054983733718 | 3.29499366929767  | 3.35256607381022  |
| H | 0.33084256233975  | 5.26701405741219  | 6.13280060600140  |

|   |                   |                   |                   |
|---|-------------------|-------------------|-------------------|
| H | -0.62437497655746 | -3.35868498888932 | 2.61147235290959  |
| H | -3.22923005166900 | -0.35127419730086 | 0.95754628326402  |
| H | -6.97463419110018 | 1.43221932093631  | 2.23355579276928  |
| H | -0.64819748638689 | 3.01416377898033  | 6.68605412529785  |
| H | -2.71573485333893 | -1.30371325478310 | -2.10892005886779 |

---

### 5-PPh3

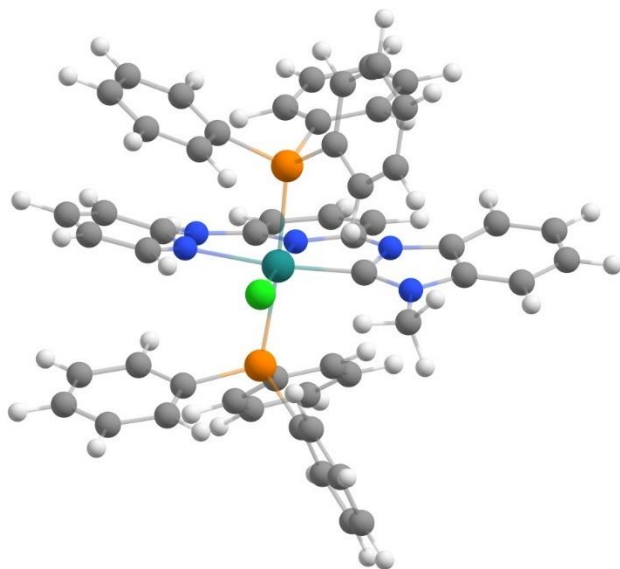

|    |                   |                   |                   |
|----|-------------------|-------------------|-------------------|
| Ru | -0.56136778355534 | 2.10865010949989  | -0.23829154434086 |
| Cl | -1.36239160578454 | 4.41754312665988  | 0.11696401213333  |
| P  | -0.00149698946820 | 2.70651907654466  | -2.50399204751159 |
| P  | -1.32419008112559 | 1.54068308434904  | 1.97729170607828  |
| N  | -1.93558148174669 | -0.77446867545329 | -1.08645965456058 |
| N  | 2.19982282973710  | 3.29491945327491  | 0.79841720663292  |
| N  | -2.52991973612819 | 1.55806054334780  | -1.00907850749041 |
| N  | 2.16355720018380  | 1.26056169414583  | -0.06327257075143 |
| N  | 0.16594008708180  | 0.22059153090818  | -0.54113440905890 |
| C  | 0.98311913888255  | 4.22215489641928  | -2.90877222553534 |

|   |                   |                   |                   |
|---|-------------------|-------------------|-------------------|
| C | -0.83167238330924 | -0.17573988780976 | 2.48963717307433  |
| C | -1.47566934516783 | 3.00937997059325  | -3.58990856291115 |
| C | 1.40453934941831  | 4.41203309235868  | -4.24920828314731 |
| C | 3.52452191241480  | 1.54738698219122  | 0.16602831054302  |
| C | -2.80792019251356 | 0.28231961207756  | -1.37927766771417 |
| C | 2.17040871352906  | -1.17714610837166 | -0.49503309777374 |
| C | 1.05160504279545  | 1.37295960853919  | -3.24612781927217 |
| C | -3.17180732474445 | 1.62728895135485  | 2.07066392672806  |
| C | -4.72929934490581 | 2.22472219966833  | -1.80944649682619 |
| C | -0.76377327339797 | 2.51262146371550  | 3.46364603738371  |
| C | 2.00697583544343  | 6.35392985430154  | -2.30361342755033 |
| C | -3.49617263540509 | 2.49797542562910  | -1.21422406329697 |
| C | -3.79990208373089 | 2.79352044627907  | 2.56488992105987  |
| C | 1.37907411634694  | -2.31716990991987 | -0.71191342059263 |
| C | 1.52904502110534  | 0.06520093211509  | -0.40453111398758 |
| C | -4.02320258234639 | -0.06745634285785 | -2.02397607136013 |
| C | 4.73058385061902  | 0.87476648491742  | -0.09984440358630 |
| C | -1.72628939902391 | -1.18471206492187 | 2.91191134019266  |
| C | 1.27317010479390  | 5.20574523609837  | -1.94397244212362 |
| C | 1.33071061655321  | 2.36822868609751  | 0.27288759873237  |
| C | 1.36771396121205  | -0.93536393790532 | -4.01642408255538 |
| C | 2.44932348726607  | 6.52658897177806  | -3.62688503906615 |
| C | 3.53272943669037  | 2.84717315604552  | 0.73778913657880  |
| C | -0.36147896407884 | 4.66649426590208  | 4.55920134026866  |
| C | 5.93064485914479  | 2.79693040452018  | 0.86689316745589  |

|   |                   |                   |                   |
|---|-------------------|-------------------|-------------------|
| C | 0.52173325222690  | 0.10856985435682  | -3.60182312896923 |
| C | 2.13959753409227  | 5.55538423428549  | -4.60166453619804 |
| C | 0.55778757884206  | -0.45422812529546 | 2.49712273924783  |
| C | 3.30352157231237  | 0.49281443574697  | -3.66493445486436 |
| C | 4.72579300671835  | 3.48666168958807  | 1.10807332171334  |
| C | -5.37476038468851 | 0.75155782096495  | 1.44029561063154  |
| C | 5.93095521308915  | 1.51989411675749  | 0.26445851798127  |
| C | -3.19626839843005 | 2.41805652787983  | -5.22433673832838 |
| C | -0.73791632210934 | 3.92719481976728  | 3.42224121015149  |
| C | 2.45824615933335  | 1.54392991384960  | -3.26603283192890 |
| C | 0.00054339586254  | -2.17616155736976 | -0.87535546448371 |
| C | -3.26158192353725 | 4.59412831923497  | -4.14054961384118 |
| C | -2.10437467331777 | 4.26894956561705  | -3.41364067659093 |
| C | 0.13347351786444  | -2.73556184202423 | 3.24332588994737  |
| C | -0.41718524514070 | 1.85665415694142  | 4.67038607860139  |
| C | -4.99245001326865 | 0.91339714713427  | -2.24360996755267 |
| C | 1.03617255001483  | -1.72119516238572 | 2.86886054460283  |
| C | -5.19841838611995 | 2.93522233805875  | 2.49356949633827  |
| C | -0.00146901635361 | 4.00806000552117  | 5.74965935040489  |
| C | -1.24496419674681 | -2.45805055654826 | 3.27672141902227  |
| C | 2.76221372973182  | -0.74771944441600 | -4.05069308221784 |
| C | -3.81693012364671 | 3.66705953066034  | -5.04332777154300 |
| C | -3.97784262643417 | 0.61065711612686  | 1.50022561455317  |
| C | -5.99112249675728 | 1.91719800409091  | 1.93361133093706  |
| C | -2.02948492456377 | 2.08947259110105  | -4.50667085084161 |



|   |                   |                   |                   |
|---|-------------------|-------------------|-------------------|
| C | -0.57579851287411 | -0.88294074946307 | -0.82142740815888 |
| C | -0.03392268611448 | 2.60187202945779  | 5.80055982672221  |
| C | 1.84969950590848  | 4.58390225558814  | 1.39047246171408  |
| H | 1.15838231131134  | 3.66153314603280  | -5.02188330292900 |
| H | 3.25326226998141  | -1.26657935867652 | -0.34618450054234 |
| H | -5.46092907413911 | 3.03809703763655  | -1.93775837498361 |
| H | 2.22063246040732  | 7.12655512600703  | -1.54324679949674 |
| H | -3.23905785145331 | 3.51056702378496  | -0.85978153640866 |
| H | -3.20178104105136 | 3.60264804184512  | 3.01417639059981  |
| H | 1.84589620633756  | -3.31536880187133 | -0.75733111858706 |
| H | -4.19265136071429 | -1.11136520941259 | -2.34324892482612 |
| H | 4.76639003591288  | -0.10372970735255 | -0.60111214684189 |
| H | -2.80560752593106 | -0.97787167514599 | 2.99097553697959  |
| H | 0.87136668158202  | 5.09706762861875  | -0.92731534791008 |
| H | 0.93185918598092  | -1.90792382103874 | -4.30613886103971 |
| H | 3.02468862875169  | 7.42681088899244  | -3.90741885898931 |
| H | -0.35384692148828 | 5.77037808968441  | 4.51045364768606  |
| H | 6.88909520738681  | 3.26970093724137  | 1.14259690561120  |
| H | -0.56226187116618 | -0.08119457730727 | -3.54086752721485 |
| H | 2.46827539630325  | 5.69387685918053  | -5.64706262467371 |
| H | 1.28070258650443  | 0.34333468834896  | 2.25419532121266  |
| H | 4.39637860142101  | 0.65275721466986  | -3.67973548920081 |
| H | 4.72649198475206  | 4.49176140301191  | 1.56135333082293  |
| H | -5.98566782950711 | -0.05701166428944 | 1.00087218960665  |
| H | 6.89084691584340  | 1.01267338055400  | 0.06551490713055  |

|   |                   |                   |                   |
|---|-------------------|-------------------|-------------------|
| H | -3.61196057732168 | 1.69120566473306  | -5.94495254792765 |
| H | -1.02404672009680 | 4.45021288550797  | 2.49365823164657  |
| H | 2.90395488489931  | 2.50773871317168  | -2.96630682502886 |
| H | -0.64081874344065 | -3.05279702840068 | -1.07071964862714 |
| H | -3.73247412122188 | 5.58323624413154  | -3.99873405416160 |
| H | -1.68908490793516 | 4.99809928526864  | -2.69630538636322 |
| H | 0.50705227749865  | -3.73392291552700 | 3.53247517380959  |
| H | -0.44752604869751 | 0.75707881920371  | 4.74152052427252  |
| H | -5.94156433860822 | 0.65500128503728  | -2.74464667072570 |
| H | 2.12362101881033  | -1.91420865963975 | 2.87417301927811  |
| H | -5.67015800263794 | 3.85338099671229  | 2.88638358077779  |
| H | 0.29642219718797  | 4.58949529588263  | 6.64038201477805  |
| H | -1.95876051417940 | -3.23393732301258 | 3.60684963870122  |
| H | 3.42551588635277  | -1.56880059302940 | -4.37555858307948 |
| H | -4.72667442674315 | 3.92311676453111  | -5.61499906093481 |
| H | -3.51615481007056 | -0.30356799770160 | 1.09466437332497  |
| H | -7.08865762296254 | 2.02976818317993  | 1.88373814566978  |
| H | -1.54733589670879 | 1.11926392969847  | -4.70210045522738 |
| H | 0.23583123453505  | 2.07362082304775  | 6.73246808443421  |
| H | -2.36066668690175 | -1.68644912560865 | -1.28055918301834 |
| H | 0.77663785381643  | 4.78334649954575  | 1.20547201136828  |
| H | 2.46113972826942  | 5.39004362355885  | 0.92902297478569  |
| H | 2.03863589645186  | 4.56333661187528  | 2.48644101334258  |

---

5a-PPh3

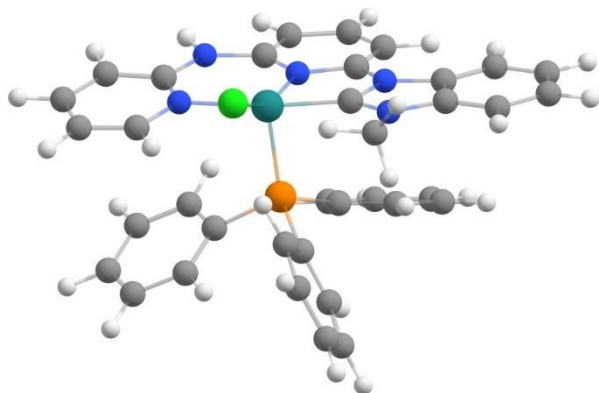

|    |                   |                   |                   |
|----|-------------------|-------------------|-------------------|
| Ru | -0.62499796449446 | 2.16654799924754  | -0.21943846883872 |
| Cl | -0.84304210610459 | 4.49952206134300  | -0.58655969751986 |
| P  | -1.16214597653727 | 1.59431176182611  | 1.89043478580042  |
| N  | -2.21511389772191 | -0.28294681326299 | -1.74913022759065 |
| N  | 2.25823715997349  | 2.98440444901759  | 0.79068612737091  |
| N  | -2.64155590797404 | 1.95021851774266  | -0.95375174208748 |
| N  | 1.92922897740337  | 0.90122231011049  | 0.12439257597903  |
| N  | -0.13520845394358 | 0.23943603891525  | -0.67477981242678 |
| C  | -0.24634079569027 | 0.09798099744621  | 2.49705720429796  |
| C  | 3.27168374383721  | 0.95119339984621  | 0.55977755749551  |
| C  | -3.05548264490272 | 0.82391428159940  | -1.58945765563289 |
| C  | 1.61414206678200  | -1.46109126302453 | -0.56748405365034 |
| C  | -2.97512118800478 | 1.27429381339405  | 2.09763631749210  |
| C  | -4.89257040629764 | 2.85191681289791  | -1.15750812298148 |
| C  | -0.81660764017963 | 2.84513882245031  | 3.20737724554621  |
| C  | -3.56624584096879 | 2.93304104289892  | -0.73287203583476 |
| C  | -3.76974851042935 | 2.16999472034047  | 2.85152144459608  |
| C  | 0.73299135392769  | -2.39698463060937 | -1.13774684993155 |
| C  | 1.15651666404950  | -0.15320507801021 | -0.36969401129969 |

|   |                   |                   |                   |
|---|-------------------|-------------------|-------------------|
| C | -4.37666239964958 | 0.68963219730960  | -2.09539815425700 |
| C | 4.32354302810517  | 0.02069844649568  | 0.64631337048792  |
| C | -0.76480487392436 | -1.21451242495003 | 2.41851540389176  |
| C | 1.28872085905892  | 2.15951803392518  | 0.28295493985772  |
| C | 3.46669042694078  | 2.29224214142644  | 0.98871676754805  |
| C | -0.64349498254608 | 5.16853172402225  | 3.94168412558020  |
| C | 5.73563733596160  | 1.80116370998450  | 1.60135456472009  |
| C | 1.08943289759479  | 0.27943086894760  | 2.93452656320464  |
| C | 4.68986178396681  | 2.73921385353272  | 1.51335383454319  |
| C | -5.00132596267281 | 0.03286238769552  | 1.49632827995854  |
| C | 5.55245093963972  | 0.46783095634132  | 1.17297056362899  |
| C | -0.80637039264950 | 4.22545681222364  | 2.90846731060204  |
| C | -0.54798912011809 | -1.99597937684465 | -1.52143184873106 |
| C | 1.37538293152199  | -2.13178763724372 | 3.15481264169529  |
| C | -0.68672215599410 | 2.41924323061602  | 4.55350684717285  |
| C | -5.30212899774157 | 1.70994281155105  | -1.87485372358320 |
| C | 1.89250471685813  | -0.82601461239996 | 3.26197018255613  |
| C | -5.16458185493326 | 1.99417223146305  | 2.92606513902000  |
| C | -0.49387097388133 | 4.74310504108338  | 5.27481787431361  |
| C | 0.04368189753543  | -2.32029899994976 | 2.74202539475529  |
| C | -3.61036208830406 | 0.20838069388736  | 1.41374284247594  |
| C | -5.78455764992168 | 0.92744744618714  | 2.25158425790720  |
| C | -0.95381323158875 | -0.65558082149499 | -1.29497177386633 |
| C | -0.52066801713141 | 3.36723933270351  | 5.57823196689191  |
| C | 2.11245860987039  | 4.40602423668921  | 1.10995023652537  |

|   |                   |                   |                   |
|---|-------------------|-------------------|-------------------|
| H | 2.63330100405141  | -1.75496784751571 | -0.29211160558995 |
| H | -5.58739849019486 | 3.67896464145959  | -0.93837576015848 |
| H | -3.18601600725781 | 3.82503004802302  | -0.20915564658781 |
| H | -3.30404989365081 | 3.01423273338857  | 3.38641315019728  |
| H | 1.05995981831927  | -3.43849582528914 | -1.29557196372845 |
| H | -4.66760824731313 | -0.22897714058923 | -2.63578168972183 |
| H | 4.22922070078678  | -1.02548146003957 | 0.32332157502473  |
| H | -1.81203063104675 | -1.38957478592493 | 2.12750808681656  |
| H | -0.63684623787431 | 6.24586440529538  | 3.69794557143925  |
| H | 6.71225618127946  | 2.11403062485867  | 2.00918046331699  |
| H | 1.50720431097737  | 1.29645792884996  | 3.03533009421234  |
| H | 4.82840160991519  | 3.78090003433368  | 1.84704052890596  |
| H | -5.47895462913224 | -0.80729643955158 | 0.96176461602277  |
| H | 6.38983600588900  | -0.24719236735286 | 1.24843111552545  |
| H | -0.93383116107602 | 4.56553703314709  | 1.86590130577351  |
| H | -1.24607997103693 | -2.70730919726502 | -1.99595169990641 |
| H | 2.00584709471070  | -3.00167011341431 | 3.41107459504780  |
| H | -0.72231700966656 | 1.34577522693722  | 4.80862583469388  |
| H | -6.33599161712171 | 1.61176536403072  | -2.24916308177529 |
| H | 2.92869115064552  | -0.66257078506335 | 3.60676963957923  |
| H | -5.76950782441024 | 2.70213566170421  | 3.51984278106424  |
| H | -0.36277302489354 | 5.48466187384421  | 6.08287927865041  |
| H | -0.37919233809961 | -3.33868435622717 | 2.67994490891317  |
| H | -3.02378334134001 | -0.48890154587169 | 0.79397208591420  |
| H | -6.87880919953113 | 0.79169768164390  | 2.31248406757530  |

|   |                   |                   |                   |
|---|-------------------|-------------------|-------------------|
| H | -0.41591623263711 | 3.02688575816175  | 6.62379026693464  |
| H | -2.67557621375556 | -1.04259158208027 | -2.26114234008970 |
| H | 1.16312866475794  | 4.77493985083310  | 0.67619844849091  |
| H | 2.95598995491824  | 4.97210105526478  | 0.65814535659719  |
| H | 2.11607421506606  | 4.55856199703783  | 2.21197182917890  |

---

### 6-PPh3

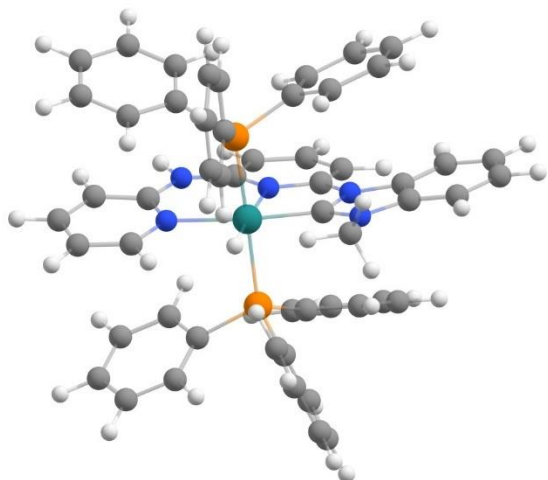

|    |                   |                   |                   |
|----|-------------------|-------------------|-------------------|
| Ru | -0.56523623393775 | 2.07522800502960  | -0.30398268471783 |
| H  | -0.65992661286431 | 3.65046797833069  | 0.14801836259123  |
| P  | 0.07085600361673  | 2.80908345211745  | -2.45069236464553 |
| P  | -1.19725971448300 | 1.63639090023591  | 1.92049183942943  |
| N  | -2.52028679312532 | -0.19925977708756 | -1.71976516276773 |
| N  | 2.42745726371063  | 2.49364095063280  | 0.52700921065566  |
| N  | -2.61222568854397 | 2.08929138776902  | -0.93593260567770 |
| N  | 1.78527081913346  | 0.44402412949751  | -0.00647488176805 |
| N  | -0.34454523991374 | 0.02952089748234  | -0.77448615192415 |
| C  | 0.38048638791641  | 4.60768999280137  | -2.77992955884764 |
| C  | -0.49138722452223 | 0.01972100904847  | 2.50699934117372  |

|   |                   |                   |                   |
|---|-------------------|-------------------|-------------------|
| C | -1.19386668949263 | 2.46698897773451  | -3.77288111281899 |
| C | 0.80167495839042  | 5.00773795449885  | -4.07275350481312 |
| C | 3.17272076542367  | 0.36055322838739  | 0.22976826994472  |
| C | -3.18074242693494 | 1.02677688785724  | -1.56500224234189 |
| C | 1.10964613814357  | -1.89989820948845 | -0.51362321524898 |
| C | 1.68001513587547  | 2.02034177075207  | -2.93565723302649 |
| C | -3.03030414939626 | 1.57422453415186  | 2.19581292857375  |
| C | -4.70873078996264 | 3.30914659306378  | -1.14792711259082 |
| C | -0.63897151824762 | 2.79995077186191  | 3.25135599580435  |
| C | 0.37270262157150  | 6.94894955621099  | -2.07670249296211 |
| C | -3.38342084842919 | 3.19706532176468  | -0.72767039498206 |
| C | -3.67656607299537 | 2.56790367377715  | 2.96830602821743  |
| C | 0.08828356706333  | -2.71828584238161 | -1.02884398780071 |
| C | 0.86345144625615  | -0.52087976240068 | -0.42977706500124 |
| C | -4.51020715499250 | 1.08687332850199  | -2.06649520327389 |
| C | 4.12490141940473  | -0.66944505090946 | 0.14841109529138  |
| C | -1.20086781836261 | -1.20179341005762 | 2.48425923649553  |
| C | 0.16089688450051  | 5.58553827972141  | -1.78927460538591 |
| C | 1.31565930752979  | 1.77796275089522  | 0.15183362182638  |
| C | 3.03485079507993  | 0.01359153645130  | -3.34191040945824 |
| C | 0.80453482541323  | 7.34054860409792  | -3.35676865529023 |
| C | 3.57179087320043  | 1.68120491481164  | 0.57782012366156  |
| C | -0.01203579253069 | 5.05371197813445  | 3.96926561427460  |
| C | 5.85479878206116  | 0.96397006076615  | 0.78805323670450  |
| C | 1.77946674920400  | 0.62986053884557  | -3.19197719479118 |

|   |                   |                   |                   |
|---|-------------------|-------------------|-------------------|
| C | 1.01677044869277  | 6.36687588086227  | -4.35511926491472 |
| C | 0.88467234206537  | 0.00121986772573  | 2.84807025515300  |
| C | 4.13229577793062  | 2.14278397101070  | -2.93776075804890 |
| C | 4.90633052829111  | 2.00387898017471  | 0.86398337872644  |
| C | -5.22896292512899 | 0.66820163978538  | 1.59196655575546  |
| C | 5.46839266709885  | -0.34646368270490 | 0.43348199083919  |
| C | -2.30623149411584 | 1.07496373071771  | -5.45404686724459 |
| C | -0.37713536355944 | 4.15380517886021  | 2.94988659115466  |
| C | 2.87781476012081  | 2.76642309247067  | -2.80677193413663 |
| C | -1.12638981904479 | -2.15577499655385 | -1.43999713080361 |
| C | -3.34092169609568 | 3.15554877746385  | -4.73932920053176 |
| C | -2.26244120129577 | 3.39376731207523  | -3.87116232511354 |
| C | 0.82520039721264  | -2.42443364258832 | 3.09169316572616  |
| C | -0.54845001164991 | 2.35988456199852  | 4.59450942143875  |
| C | -5.27935956529600 | 2.22961665641912  | -1.85283985184294 |
| C | 1.53604773467447  | -1.20884469895577 | 3.14076638020760  |
| C | -5.08156072154099 | 2.60955269348628  | 3.04882299045530  |
| C | 0.09493490313130  | 4.60687240513960  | 5.29978457098060  |
| C | -0.54470069678261 | -2.41417715710231 | 2.77209366183297  |
| C | 4.21703926092674  | 0.76507164065868  | -3.20905938233664 |
| C | -3.37114409031160 | 1.99118172657788  | -5.53090941408214 |
| C | -3.82719471834148 | 0.62963340860037  | 1.50216618106149  |
| C | -5.86242077156736 | 1.66202838832458  | 2.36277755330219  |
| C | -1.22650091842841 | 1.30757816954603  | -4.57960461514094 |
| C | -1.31315253142795 | -0.75740605459802 | -1.29379702258955 |



|   |                   |                   |                   |
|---|-------------------|-------------------|-------------------|
| C | -0.17782977335308 | 3.25945804010688  | 5.60988808941781  |
| C | 2.43940583195812  | 3.92975964193499  | 0.77382351051747  |
| H | 0.96273991790697  | 4.25210840075963  | -4.86313974406630 |
| H | 2.05473503974475  | -2.33644092152944 | -0.16786141480731 |
| H | -5.27594331892370 | 4.22993227200574  | -0.93597565693963 |
| H | 0.19514795283272  | 7.70887378318237  | -1.29470718226818 |
| H | -2.87393841619599 | 4.01643057648385  | -0.19549164535582 |
| H | -3.08226820284002 | 3.32142432155851  | 3.51214832641702  |
| H | 0.24378350245675  | -3.80795572979201 | -1.10483136438214 |
| H | -4.93094771600538 | 0.21928863371037  | -2.60489237485238 |
| H | 3.86456224211162  | -1.69586944640797 | -0.14695826652116 |
| H | -2.28038377184658 | -1.21960069580287 | 2.26459257330614  |
| H | -0.19419566071310 | 5.26010342542650  | -0.79426992671568 |
| H | 3.08528854334024  | -1.07005068791780 | -3.55019681701687 |
| H | 0.97183902593707  | 8.40873941506339  | -3.58306167428920 |
| H | 0.18994170096251  | 6.11132148393295  | 3.72155262328554  |
| H | 6.91497092952761  | 1.18017520328745  | 1.00622117067631  |
| H | 0.87763889525168  | 0.00012385833973  | -3.25136062803307 |
| H | 1.34840410002289  | 6.67107194859453  | -5.36392739141666 |
| H | 1.45374051770756  | 0.94667238946994  | 2.90118963935828  |
| H | 5.05280488132104  | 2.74340958230156  | -2.82957426924689 |
| H | 5.20525134568527  | 3.03094185502621  | 1.13245881629556  |
| H | -5.83242024898307 | -0.08145348529638 | 1.04974306775606  |
| H | 6.23198621966246  | -1.14119050032460 | 0.37251171550175  |
| H | -2.30428261070886 | 0.17206926564846  | -6.09113150811051 |

|   |                   |                   |                   |
|---|-------------------|-------------------|-------------------|
| H | -0.47112300139023 | 4.48990345841476  | 1.90205548520181  |
| H | 2.83316577192306  | 3.84954989745995  | -2.59984514544828 |
| H | -1.93212383807608 | -2.78719499697479 | -1.85320442424021 |
| H | -4.16199029935591 | 3.89177132697046  | -4.80158157230896 |
| H | -2.24871129146025 | 4.32055408307162  | -3.27094705443312 |
| H | 1.33613780459785  | -3.37679676983524 | 3.31968003996887  |
| H | -0.76814781498460 | 1.30855880474015  | 4.85142794527602  |
| H | -6.31648163611277 | 2.27787941330839  | -2.22750396174373 |
| H | 2.60710578780673  | -1.19974722693021 | 3.41050705369598  |
| H | -5.56779280033821 | 3.39234679038613  | 3.65802191229905  |
| H | 0.38687968352788  | 5.31042754990981  | 6.09978245940856  |
| H | -1.11741618946558 | -3.35860944375024 | 2.75507588718358  |
| H | 5.20205997081059  | 0.27724110539296  | -3.31104460424234 |
| H | -4.21571236120856 | 1.80713751283182  | -6.21854434453491 |
| H | -3.35565804422494 | -0.14224515800333 | 0.87194794099159  |
| H | -6.96434200569158 | 1.69606448490040  | 2.42863994110977  |
| H | -0.39914575136052 | 0.58149497942227  | -4.55894255563694 |
| H | -0.10460311901667 | 2.90537411484614  | 6.65366323388672  |
| H | -3.10551591549929 | -0.88287857488291 | -2.20972822004292 |
| H | 1.42534827560863  | 4.31381876250618  | 0.55427204688616  |
| H | 3.17467140672427  | 4.43123751123526  | 0.10558526860858  |
| H | 2.69792817000852  | 4.14796398291767  | 1.83387100524707  |

---

**6a-PPh3**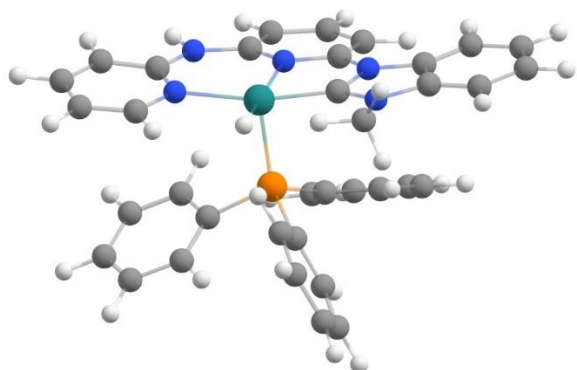

|    |                   |                   |                   |
|----|-------------------|-------------------|-------------------|
| Ru | -0.66856552032607 | 2.09764747802963  | -0.09988526724072 |
| H  | -0.96088763374218 | 3.65058098085107  | 0.33025026423130  |
| P  | -1.17494851547517 | 1.63669298825870  | 2.00696522317488  |
| N  | -2.22486650853845 | -0.35878015430852 | -1.71750961817434 |
| N  | 2.21002484455583  | 2.92510762545627  | 0.82224709102698  |
| N  | -2.60094738171503 | 1.91964639255174  | -0.97120287935488 |
| N  | 1.91873161582250  | 0.85103351776371  | 0.09864158820763  |
| N  | -0.11130322680462 | 0.16258379720810  | -0.75145234264357 |
| C  | -0.25639574266241 | 0.13431711773888  | 2.60206539736353  |
| C  | 3.28105408403617  | 0.94497375402862  | 0.45247579564415  |
| C  | -3.00665239684327 | 0.80015687236156  | -1.63895674059942 |
| C  | 1.60189447414515  | -1.54330983744155 | -0.51123215464755 |
| C  | -2.98981443638988 | 1.29925535022433  | 2.18845101846605  |
| C  | -4.76622624405625 | 2.94558496463677  | -1.42418578293411 |
| C  | -0.85237436582698 | 2.86750085734448  | 3.35355956889975  |
| C  | -3.48913742416554 | 2.96015375464794  | -0.86872374074822 |
| C  | -3.80859034682848 | 2.16151158402561  | 2.95410997911221  |
| C  | 0.71003031348600  | -2.49025726535039 | -1.05405701387230 |

|   |                   |                   |                   |
|---|-------------------|-------------------|-------------------|
| C | 1.16163656176075  | -0.21827277157675 | -0.39823492492411 |
| C | -4.28581269491937 | 0.73049051407223  | -2.26024290655509 |
| C | 4.37468910234509  | 0.06207417080105  | 0.41011164873771  |
| C | -0.79784960444705 | -1.17026231962728 | 2.56326394012207  |
| C | 1.23699784337640  | 2.08090609337363  | 0.34251471775356  |
| C | 3.45274418207044  | 2.27753340298238  | 0.92352415652993  |
| C | -0.74820448422193 | 5.18574624893204  | 4.12655185229183  |
| C | 5.77715595959496  | 1.85409737455112  | 1.35745735012297  |
| C | 1.10095437438619  | 0.29869870224763  | 2.97593658909577  |
| C | 4.69144508256618  | 2.75124814799785  | 1.38346929022200  |
| C | -4.99302266563831 | 0.07126119630127  | 1.48688564487499  |
| C | 5.61954324132156  | 0.53700670780425  | 0.87347914372769  |
| C | -0.89684861865009 | 4.25278051578949  | 3.08343048778340  |
| C | -0.56718785143355 | -2.10175976521751 | -1.46762016750143 |
| C | 1.36114577867690  | -2.11468745110623 | 3.20556789788045  |
| C | -0.67830215777838 | 2.42557335624836  | 4.68803088865896  |
| C | -5.16876591987110 | 1.80303176705813  | -2.14969006376210 |
| C | 1.90249241213323  | -0.81560054652800 | 3.27512640801223  |
| C | -5.20488856131579 | 1.98031858350032  | 2.98022375625047  |
| C | -0.55545957449773 | 4.74202744458308  | 5.44896897153634  |
| C | 0.00856487636672  | -2.28608492548408 | 2.85920623196133  |
| C | -3.60077288837968 | 0.25401413788289  | 1.45155929221920  |
| C | -5.80154914775680 | 0.93807549611421  | 2.24840718335821  |
| C | -0.95068178272019 | -0.74488286497509 | -1.29781901573285 |
| C | -0.52523491315966 | 3.36135664389406  | 5.72703070479749  |

|   |                   |                   |                   |
|---|-------------------|-------------------|-------------------|
| C | 1.99754114529294  | 4.32789713791980  | 1.16719841096210  |
| H | 2.59632793796098  | -1.84971780233516 | -0.16347736529102 |
| H | -5.43100889241487 | 3.81539355880621  | -1.29647277895554 |
| H | -3.11221101955614 | 3.82536164536321  | -0.30008632754216 |
| H | -3.36011939504781 | 2.98558668354497  | 3.53380301855552  |
| H | 1.02371348416983  | -3.54357775614045 | -1.15176354935020 |
| H | -4.57628620640598 | -0.17940229080721 | -2.81571468100484 |
| H | 4.29788323938252  | -0.96378673597202 | 0.02140733812503  |
| H | -1.86119105794807 | -1.32871400068743 | 2.32342732439242  |
| H | -0.78549433718190 | 6.26717690216585  | 3.90409722347285  |
| H | 6.76620519673657  | 2.18949004905833  | 1.71435294810330  |
| H | 1.53713457019621  | 1.31066162024027  | 3.04779376906668  |
| H | 4.81293191472184  | 3.78370637078573  | 1.75154355578703  |
| H | -5.45208930326239 | -0.75271614243770 | 0.91195210912516  |
| H | 6.48974737625219  | -0.14158179141903 | 0.85117647823959  |
| H | -1.05793216014392 | 4.58814416290497  | 2.04313989063940  |
| H | -1.26887971267084 | -2.83319503211233 | -1.90498919280953 |
| H | 1.99024359277051  | -2.99166209543964 | 3.44036579826071  |
| H | -0.66828172784055 | 1.34686667955862  | 4.92286715932722  |
| H | -6.16552361532717 | 1.75068555131732  | -2.62129723367133 |
| H | 2.95648067208062  | -0.66581329172432 | 3.56894392384418  |
| H | -5.83002424123139 | 2.66384557134814  | 3.58186784976208  |
| H | -0.43443595282528 | 5.47387014802913  | 6.26740406507278  |
| H | -0.43222931484621 | -3.29842917434232 | 2.82886381805984  |
| H | -2.98981732402097 | -0.42070134949420 | 0.82977283885947  |

|   |                   |                   |                   |
|---|-------------------|-------------------|-------------------|
| H | -6.89683631076247 | 0.79849883236526  | 2.27155934100490  |
| H | -0.38545068649188 | 3.00739935901328  | 6.76395378621205  |
| H | -2.71852218751147 | -1.11828877104008 | -2.19813436110923 |
| H | 0.97015525469304  | 4.60155741998795  | 0.85675105734140  |
| H | 2.72970833738248  | 4.96725800318579  | 0.62596519676711  |
| H | 2.11037658536951  | 4.48856690071096  | 2.26252912538056  |

---

**1-dft-PH3**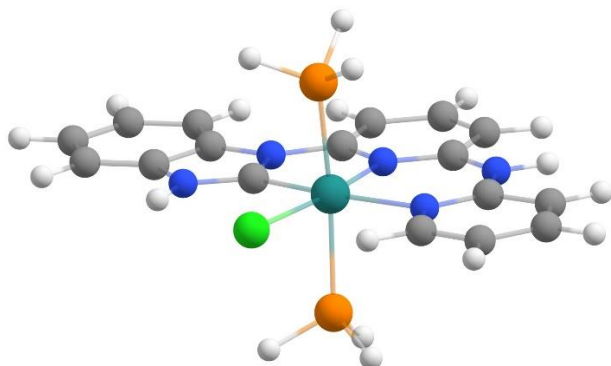

|    |                   |                   |                   |
|----|-------------------|-------------------|-------------------|
| Ru | -0.48978865376733 | 1.95975073695798  | -0.49897093811660 |
| Cl | -1.28647995914165 | 4.23237318836073  | -0.09752871934371 |
| P  | -1.16950877223039 | 1.55246989447320  | 1.70168873304028  |
| P  | -0.05079128985758 | 2.72041975068100  | -2.66710476202874 |
| N  | 0.45829990822551  | 0.15695082262693  | -0.73633296104574 |
| N  | 2.26215221560183  | 1.38209220871594  | 0.04709281366018  |
| N  | -2.39816556520383 | 1.20347324834105  | -1.18955854070635 |
| N  | 1.96970271354576  | 3.51409817517133  | 0.53679558675288  |
| N  | -1.47652986903482 | -1.00386810083547 | -1.54112640215428 |
| C  | -0.12864934591980 | -0.98271637096253 | -1.18845750517035 |
| C  | -4.89702016515141 | 0.25932379207824  | -2.08440614241448 |
| C  | 0.60963178651424  | -2.18841055203655 | -1.31704544098875 |
| C  | 5.83509151615614  | 2.09656371366144  | 1.12734271478552  |
| C  | 4.35654454371633  | 4.05207774773675  | 1.27658068107469  |
| C  | 5.62359617827615  | 3.45864238123677  | 1.43556116142809  |
| C  | 3.32027636595532  | 3.23556281306705  | 0.80190283234299  |
| C  | 1.30779137330146  | 2.42061672296528  | 0.08104209961279  |
| C  | 4.79373374243518  | 1.27438592469745  | 0.65019398971555  |

|   |                   |                   |                   |
|---|-------------------|-------------------|-------------------|
| C | -3.79229581569018 | -0.59289708954563 | -2.02863848239100 |
| C | 1.80139532500696  | 0.13313333917127  | -0.39943653621445 |
| C | 1.96359198963173  | -2.20063723950765 | -0.97234709128069 |
| C | -3.48601785630882 | 2.02693959082181  | -1.24869940213612 |
| C | -4.74297950621977 | 1.60312171125611  | -1.68502489961631 |
| C | 2.58178193850410  | -1.02532949225255 | -0.50406318087888 |
| C | -2.54154717204109 | -0.09214473595210 | -1.57258389159853 |
| C | 3.52519985276195  | 1.85806373487875  | 0.48893522107590  |
| H | -0.78665093206530 | 0.34980690598403  | 2.40350966516961  |
| H | -1.18262522432285 | 2.96040453203290  | -3.52095584444662 |
| H | 0.60919885482167  | 3.98680137686787  | -2.81185035141548 |
| H | 0.75044605989271  | 1.95669335906873  | -3.59462310737942 |
| H | -0.80639428304100 | 2.50970782956565  | 2.70844547934937  |
| H | -2.58496077097923 | 1.49447677384649  | 1.94910153788456  |
| H | -1.76763022456229 | -1.93354420621549 | -1.86190372355276 |
| H | -5.87132983412327 | -0.12179253908996 | -2.43692267193175 |
| H | 0.11376395781915  | -3.10327278053915 | -1.68568365188780 |
| H | 6.83936655188619  | 1.65908187901057  | 1.26126956261098  |
| H | 4.18461527899529  | 5.11547933020692  | 1.51489863579982  |
| H | 6.46429308790822  | 4.06961034899252  | 1.80684442763400  |
| H | 4.99827135903429  | 0.21827949345295  | 0.42004385530985  |
| H | -3.88368980623999 | -1.65041150239464 | -2.33537416024035 |
| H | 2.54943573931430  | -3.13063071279147 | -1.06667508112029 |
| H | -3.29418893263169 | 3.06706318821768  | -0.92132013779737 |
| H | -5.58376604781244 | 2.31596876416893  | -1.71025035612898 |



|   |                  |                   |                   |
|---|------------------|-------------------|-------------------|
| H | 3.64464721421931 | -1.02233936929706 | -0.22961484470770 |
| H | 1.47764528532090 | 4.41078029770588  | 0.65062502334647  |

---

**1a-dft-PH3**

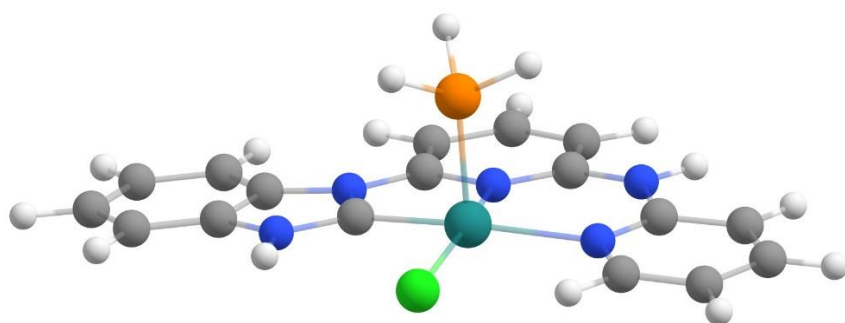

|    |                   |                   |                   |
|----|-------------------|-------------------|-------------------|
| Ru | -0.55520065032469 | 1.92078206233858  | -0.30670271186440 |
| Cl | -1.24671325124187 | 4.18021541405037  | -0.17232770457409 |
| P  | -1.08898432568611 | 1.44808269066567  | 1.77178192825077  |
| N  | 0.41280094954628  | 0.14222294042356  | -0.63252316648020 |
| N  | 2.21921950403568  | 1.36876451273098  | 0.14842118996930  |
| N  | -2.39838476902402 | 1.21730497513704  | -1.16706808628260 |
| N  | 1.92241665371170  | 3.49331398053688  | 0.66235246278918  |
| N  | -1.52136040282497 | -1.02397171697316 | -1.41852723434868 |

|   |                   |                   |                   |
|---|-------------------|-------------------|-------------------|
| C | -0.16689853228185 | -0.99538451822310 | -1.10286977539458 |
| C | -4.85605735767779 | 0.31667648362577  | -2.22214667244902 |
| C | 0.58250203208341  | -2.18980360179497 | -1.27246356009106 |
| C | 5.83884502936970  | 2.14367278477523  | 1.00274539947403  |
| C | 4.33996866646269  | 4.07386630362690  | 1.24911792126055  |
| C | 5.62363274262986  | 3.50233905242751  | 1.32670577181412  |
| C | 3.28966489136485  | 3.23815098816386  | 0.84127229476376  |
| C | 1.25298045764104  | 2.39183220053002  | 0.23754921018464  |
| C | 4.78495346234878  | 1.30332455711822  | 0.59082789012699  |
| C | -3.78026797142971 | -0.56026448164665 | -2.07778691039716 |
| C | 1.76312456115737  | 0.12357290725497  | -0.31539619762695 |
| C | 1.93900019914000  | -2.19588810509817 | -0.94243095932245 |
| C | -3.46225506352423 | 2.06533857031072  | -1.32038359303803 |
| C | -4.69411154523025 | 1.66427247476896  | -1.83642179440937 |
| C | 2.55122410263212  | -1.02375289607452 | -0.45430127345605 |
| C | -2.55169971593305 | -0.08249094175330 | -1.54397219893555 |
| C | 3.49815594325125  | 1.86437689962945  | 0.51374273811815  |
| H | -0.38776991164618 | 0.38450970948588  | 2.44886313695472  |
| H | -0.95366144471335 | 2.48709496924758  | 2.75817044240208  |
| H | -2.44840242773394 | 1.04229240932107  | 2.01963390483489  |
| H | -1.81982218440157 | -1.95487191541209 | -1.72969225815103 |
| H | -5.81311107355044 | -0.04591984374536 | -2.63617709281173 |
| H | 0.09179287527251  | -3.09926922800029 | -1.66066193358060 |
| H | 6.85742903918088  | 1.72448505349785  | 1.07113138643306  |
| H | 4.16503673195129  | 5.13466468954703  | 1.49648063201616  |

|   |                   |                   |                   |
|---|-------------------|-------------------|-------------------|
| H | 6.47588029641836  | 4.12732820081895  | 1.64439495497313  |
| H | 4.99468061305523  | 0.25244373467174  | 0.34226199449937  |
| H | -3.87505625736751 | -1.61929130255546 | -2.37801700637941 |
| H | 2.53420351258777  | -3.11644121622506 | -1.06618560517449 |
| H | -3.26931504477191 | 3.10784083725412  | -1.00530854591783 |
| H | -5.51189747188772 | 2.39733428343914  | -1.93407550986460 |
| H | 3.61682260262342  | -1.01772401854238 | -0.19051944960400 |
| H | 1.43548453478701  | 4.39448010064640  | 0.76314598128900  |

---

### A(H)-PH3

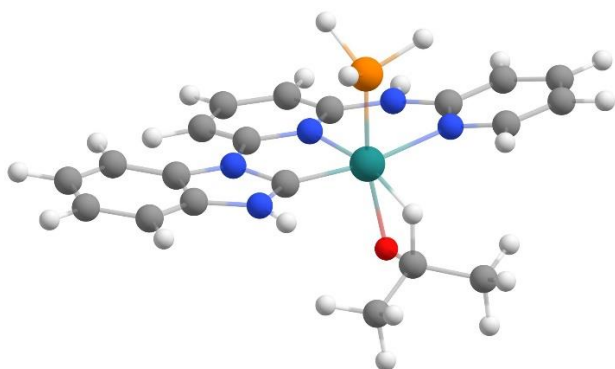

|    |                   |                   |                   |
|----|-------------------|-------------------|-------------------|
| Ru | -0.02569197376287 | 1.48058595263637  | -0.99644105608684 |
| P  | -0.89817090547592 | 1.82691193455946  | 1.09763756489662  |
| N  | -1.75237925136151 | -1.19906755823425 | -1.85049387767635 |
| N  | 2.64075267337541  | 2.36596411949185  | 0.35581155214579  |
| N  | -2.06601304316175 | 1.18325546161593  | -1.68325132142043 |
| N  | 2.26405616874637  | 0.20619667548681  | 0.15829369080380  |
| N  | 0.29070824551425  | -0.54022262841138 | -0.77836109004245 |
| C  | 3.47070156074868  | 0.32506776762386  | 0.89375787136719  |
| C  | -2.53829922291537 | -0.05302490307764 | -1.98531806141162 |
| C  | 1.95059742293105  | -2.23282423354532 | -0.19624212986668 |

|   |                   |                   |                   |
|---|-------------------|-------------------|-------------------|
| H | 2.94489345189724  | -2.49037766483086 | 0.19118663143266  |
| C | -4.24565101147990 | 2.13159657256215  | -2.21298673755183 |
| H | -4.88278862037036 | 3.02899668091101  | -2.27615323265214 |
| C | -2.92333581135496 | 2.24106320832522  | -1.78174596057441 |
| H | -2.50069830449074 | 3.21987878997275  | -1.49537801329626 |
| C | 1.09301323395017  | -3.22997966953541 | -0.69532663539929 |
| H | 1.40413193335399  | -4.28811110760684 | -0.67052844224716 |
| C | 1.51596857276764  | -0.90196971497503 | -0.25433277543960 |
| C | -3.87141998633854 | -0.24415381528635 | -2.44897898866520 |
| H | -4.22546650256109 | -1.26025036174555 | -2.69927134259354 |
| C | 4.35757162947112  | -0.59323499477670 | 1.48293463379507  |
| H | 4.19974148995684  | -1.68130865921057 | 1.44796207705633  |
| C | 1.73688581691753  | 1.47927673113413  | -0.16547021662402 |
| C | 3.70785968839707  | 1.72496556816452  | 1.00484448001112  |
| C | 5.71889274557277  | 1.31427338551044  | 2.24693112999608  |
| H | 6.61258711808228  | 1.68171279567131  | 2.78002491385925  |
| C | 4.82764062739766  | 2.24121998136856  | 1.67226761511414  |
| H | 5.00222400368969  | 3.32809101731370  | 1.74805652185708  |
| C | 5.48255896235217  | -0.07501335806301 | 2.15699278572425  |
| H | 6.19216164039045  | -0.77839473325205 | 2.62559762039788  |
| C | -0.14460090005634 | -2.87650988027035 | -1.23811689577319 |
| H | -0.82359687076483 | -3.64699068449165 | -1.64286005713855 |
| C | -4.72502096963910 | 0.85219566898534  | -2.56831998640357 |
| H | -5.76018731683874 | 0.71219089987830  | -2.92511772671711 |
| C | -0.52131503699624 | -1.50887519859070 | -1.27834793883775 |

|   |                   |                   |                   |
|---|-------------------|-------------------|-------------------|
| H | -2.23456723184389 | -2.03755105155625 | -2.19086435350664 |
| C | -0.54056014750588 | 3.59793291170486  | -3.72754500619318 |
| C | 0.49364340795557  | 2.87121932329699  | -2.83881361820915 |
| H | 0.01148184324972  | 3.15839407045577  | -1.60559634566958 |
| H | -1.50891374304908 | 3.06021938531338  | -3.76196995205856 |
| H | -0.70881619995223 | 4.65124507258368  | -3.41097857749967 |
| H | -0.13685464796378 | 3.61586642972297  | -4.76538080740849 |
| C | 1.85563537491338  | 3.60295128709871  | -2.82144415910650 |
| H | 2.61452303644758  | 3.03104171460758  | -2.25107040536344 |
| H | 2.21849548987261  | 3.68220931443887  | -3.87132816737369 |
| H | 1.77768134497739  | 4.63702411639246  | -2.41587416084873 |
| O | 0.54674988749886  | 1.53606707231277  | -2.99216885318239 |
| H | -2.28067797863414 | 2.22351369136110  | 1.22081212122313  |
| H | -0.33927503061547 | 2.82701386876889  | 1.97427068284784  |
| H | -0.93022858058091 | 0.75593657840896  | 2.07104585981055  |
| H | 2.53070191728611  | 3.38031216978121  | 0.26692914049921  |

---

**TS-I-(H)-PH3**

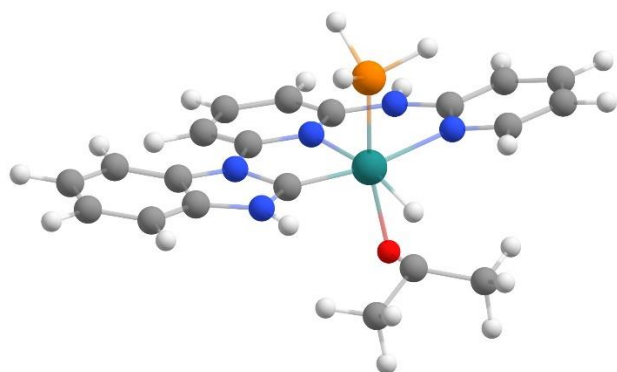

|    |                   |                  |                   |
|----|-------------------|------------------|-------------------|
| Ru | -0.02397897258248 | 1.49728423447062 | -1.00558197553016 |
| P  | -0.90010377206397 | 1.85781420822507 | 1.07620259802730  |

|   |                   |                   |                   |
|---|-------------------|-------------------|-------------------|
| N | -1.74857203435148 | -1.19797608875840 | -1.85004284359156 |
| N | 2.63431878808374  | 2.37592221662389  | 0.36059678490978  |
| N | -2.07036215188916 | 1.18690265864586  | -1.67984418627077 |
| N | 2.26720900041895  | 0.21532750757874  | 0.14660342614046  |
| N | 0.29626808323391  | -0.54075474377851 | -0.78635461619249 |
| C | 3.46900699513085  | 0.33472601853117  | 0.88942114472570  |
| C | -2.53944694845232 | -0.05343601323589 | -1.97402930017285 |
| C | 1.96785531941177  | -2.22474243428606 | -0.22187032249599 |
| H | 2.96638332023135  | -2.47953020136400 | 0.15649866849896  |
| C | -4.25971410019821 | 2.12280482339390  | -2.19453457902247 |
| H | -4.90117338335718 | 3.01724333870799  | -2.25639154850182 |
| C | -2.93416988017495 | 2.24021469823454  | -1.77607202737702 |
| H | -2.51210412070400 | 3.22156870828510  | -1.49870223919885 |
| C | 1.11155657795344  | -3.22366934326018 | -0.72055732169580 |
| H | 1.42866080290928  | -4.28023970239659 | -0.70272772506593 |
| C | 1.52428914595085  | -0.89599003200199 | -0.27031475145192 |
| C | -3.87701342179374 | -0.25182186854124 | -2.42255451425248 |
| H | -4.22916342513142 | -1.27063409594275 | -2.66446644187620 |
| C | 4.35444341641951  | -0.58406101470141 | 1.48013788591500  |
| H | 4.19929608297361  | -1.67228301301497 | 1.43867236008238  |
| C | 1.73717242087545  | 1.48981380149946  | -0.17339237235125 |
| C | 3.70062135985107  | 1.73478941578090  | 1.01036113619678  |
| C | 5.70480561244373  | 1.32317369439066  | 2.26366876506645  |
| H | 6.59383501674228  | 1.69042004037169  | 2.80465433974600  |
| C | 4.81427112564806  | 2.25048156288789  | 1.68854222263696  |

|   |                   |                   |                   |
|---|-------------------|-------------------|-------------------|
| H | 4.98452335637263  | 3.33748395611399  | 1.77208873439953  |
| C | 5.47332200214623  | -0.06627554506706 | 2.16465695419939  |
| H | 6.18180018745486  | -0.76998216870840 | 2.63448966950422  |
| C | -0.13189870554337 | -2.87560887309840 | -1.25394589876029 |
| H | -0.80918105633588 | -3.64855061283744 | -1.65688478786761 |
| C | -4.73710009328516 | 0.83952996582678  | -2.53848341376401 |
| H | -5.77520774086263 | 0.69284389837118  | -2.88388807090663 |
| C | -0.51366179775553 | -1.50889693135925 | -1.28572522753205 |
| H | -2.23222577848915 | -2.03573931607010 | -2.19011190976607 |
| C | -0.53346871415345 | 3.59702026814536  | -3.70611756870715 |
| C | 0.50798541638555  | 2.82706780063170  | -2.87058937569290 |
| H | -0.02590144766365 | 3.15366819789558  | -1.50358343926164 |
| H | -1.50764704638390 | 3.07080537430804  | -3.74405515184918 |
| H | -0.68191503980108 | 4.64007248346808  | -3.34996156587838 |
| H | -0.14677771485369 | 3.64830272772104  | -4.75006497594432 |
| C | 1.87139540083823  | 3.54522824024821  | -2.81930304227654 |
| H | 2.62917019772640  | 2.94380673404717  | -2.27929950140182 |
| H | 2.22903095663336  | 3.66911358669449  | -3.86752018876158 |
| H | 1.80139251388957  | 4.56169616059930  | -2.37125044248960 |
| O | 0.52795271103719  | 1.50858937342362  | -3.02381097955905 |
| H | -2.21575602872932 | 2.44066640037438  | 1.18342372123924  |
| H | -0.23189680932201 | 2.72023278419406  | 2.01855399215887  |
| H | -1.11894286885750 | 0.75310713298947  | 1.98607459115066  |
| H | 2.52352724197332  | 3.38999998574261  | 0.26943531086878  |

---

**B(H)-PH3**

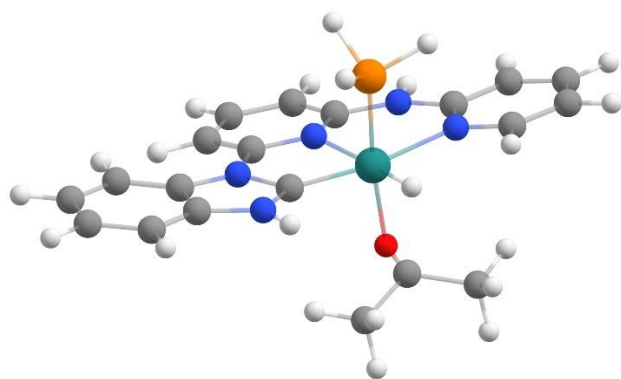

|    |                   |                   |                   |
|----|-------------------|-------------------|-------------------|
| Ru | -0.14817191339534 | 1.58626014625776  | -0.81310303955784 |
| P  | -1.01709423076189 | 1.84046293581978  | 1.26157281284729  |
| N  | -1.79088859048153 | -1.14071688937681 | -1.80083966756544 |
| N  | 2.51358488037155  | 2.43856381820008  | 0.54837341431660  |
| N  | -2.15967098080115 | 1.24383238755775  | -1.55059468516592 |
| N  | 2.21980598839432  | 0.28647145166474  | 0.17733491512074  |
| N  | 0.25805434712997  | -0.50177360940200 | -0.75510490640457 |
| C  | 3.45069832959072  | 0.40001756227348  | 0.87249526510576  |
| C  | -2.58791375678892 | 0.00363928600996  | -1.91127501989540 |
| C  | 1.99799287847157  | -2.14264579702317 | -0.33355354600762 |
| H  | 3.01301299510695  | -2.38970147357761 | 0.00308985074015  |
| C  | -4.34320988807576 | 2.15562707015541  | -2.13481644177955 |
| H  | -4.99842088590002 | 3.03993038635282  | -2.19872719901516 |
| C  | -3.04018064278160 | 2.28460446075708  | -1.65512672115746 |
| H  | -2.64043952390380 | 3.26292735337469  | -1.33858062631193 |
| C  | 1.15606179045897  | -3.14074253974795 | -0.86221721385916 |
| H  | 1.50886521935404  | -4.18528134396420 | -0.90939590498430 |
| C  | 1.50704119403716  | -0.82926305673873 | -0.29483040502248 |
| C  | -3.90261066708736 | -0.20151739051696 | -2.42290015553285 |



|   |                   |                   |                   |
|---|-------------------|-------------------|-------------------|
| H | -4.22280758121779 | -1.21694222963390 | -2.71815028965545 |
| C | 4.40149190357970  | -0.52145932552727 | 1.34695132064491  |
| H | 4.29081787617541  | -1.60883581414284 | 1.22466968995118  |
| C | 1.62920049747869  | 1.56208945172257  | -0.01805975948066 |
| C | 3.63323703083328  | 1.79522261854339  | 1.09607228731882  |
| C | 5.71082422255284  | 1.37529627793428  | 2.22102306324991  |
| H | 6.60935801835961  | 1.73736846662588  | 2.74965158009397  |
| C | 4.75683704248403  | 2.30430109107134  | 1.76314218332270  |
| H | 4.88627150121061  | 3.38791565730968  | 1.92627761852857  |
| C | 5.53049249845346  | -0.01078478398264 | 2.01987363761432  |
| H | 6.28839053646467  | -0.71789594042076 | 2.39868761786112  |
| C | -0.11441691312993 | -2.81292846851459 | -1.34161751344004 |
| H | -0.77511187872847 | -3.58804959256948 | -1.76735758947837 |
| C | -4.78008399354950 | 0.87513298366562  | -2.53830807823819 |
| H | -5.79891454939835 | 0.71968799780404  | -2.93376774034768 |
| C | -0.53430013069532 | -1.45620491231429 | -1.28813739181087 |
| H | -2.27019938036983 | -1.97017170158005 | -2.16651316116249 |
| C | -0.44731152863014 | 3.44380455679986  | -3.60615487182812 |
| C | 0.58554211655837  | 2.56980165364944  | -2.89994010606737 |
| H | -0.34182686651073 | 3.21977942946154  | -0.72041963437656 |
| H | -1.44750748266451 | 2.96907586183909  | -3.63068084905229 |
| H | -0.51690581076947 | 4.46010476854506  | -3.16316561561428 |
| H | -0.11259288956415 | 3.57060285119587  | -4.66472203306000 |
| C | 1.97968731360718  | 3.18220215514894  | -2.78516140140365 |
| H | 2.70051191088083  | 2.48298408501327  | -2.31659324218103 |

|   |                   |                  |                   |
|---|-------------------|------------------|-------------------|
| H | 2.34163129556168  | 3.39925952858363 | -3.81974030603826 |
| H | 1.97328459737281  | 4.15165047922317 | -2.24122329257229 |
| O | 0.44349842119299  | 1.29207955622128 | -2.88541050878212 |
| H | -2.36775973106636 | 2.33017898100017 | 1.37493192813179  |
| H | -0.38969654037898 | 2.73877112269130 | 2.19343316484596  |
| H | -1.14132047121026 | 0.70505208560058 | 2.14675139707905  |
| H | 2.35555242217975  | 3.45043635095966 | 0.53579717007656  |

---

## 2-dft-PH3

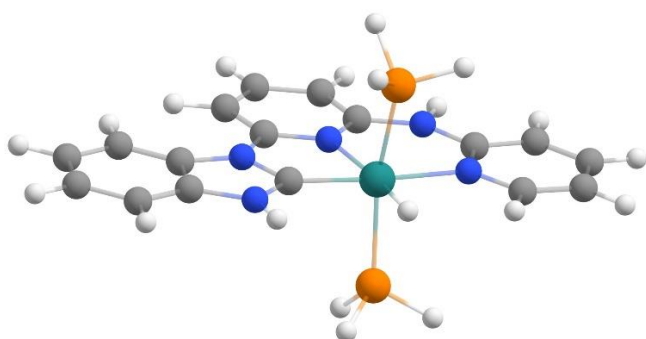

|    |                   |                   |                   |
|----|-------------------|-------------------|-------------------|
| Ru | -0.50930241591216 | 1.97874257132731  | -0.50207064784094 |
| H  | -1.13128883270728 | 3.48751354755803  | -0.25853919834092 |
| P  | -1.23243536579700 | 1.69503790756464  | 1.67913208545872  |
| P  | -0.12986448972874 | 2.84523425702266  | -2.61589711497632 |
| N  | 0.48165261453888  | 0.11763549927009  | -0.74395022654201 |
| N  | 2.25986545388506  | 1.36858424562307  | 0.03972038486012  |
| N  | -2.38461205432629 | 1.17337775228164  | -1.20114096532559 |
| N  | 1.99742035192742  | 3.49973785539257  | 0.53667509822172  |
| N  | -1.44979297180145 | -1.03930179287621 | -1.54169538246949 |
| C  | -0.09885201684586 | -1.02028671386409 | -1.18830174169789 |
| C  | -4.87360116326401 | 0.19613657796118  | -2.11256366616565 |

|   |                   |                   |                   |
|---|-------------------|-------------------|-------------------|
| C | 0.63896308196598  | -2.22651332791866 | -1.30955766012951 |
| C | 5.84786201015088  | 2.04441700263418  | 1.10309470006651  |
| C | 4.39091643935335  | 4.01203191157050  | 1.26601909605671  |
| C | 5.65338818469677  | 3.40721998986488  | 1.41719653533866  |
| C | 3.34488982386371  | 3.20604692834344  | 0.79450406103101  |
| C | 1.30371139701038  | 2.41792903339099  | 0.07685585336344  |
| C | 4.79515495541681  | 1.23491041321064  | 0.62919089300619  |
| C | -3.75907033130313 | -0.64057048938793 | -2.04305102539660 |
| C | 1.81190396640382  | 0.11119958504085  | -0.40196287787134 |
| C | 1.99253153255750  | -2.22502272047639 | -0.95725847684047 |
| C | -3.48706378857488 | 1.97915975626559  | -1.27612607930321 |
| C | -4.73720378628402 | 1.54362545815453  | -1.71904365722450 |
| C | 2.60353226265415  | -1.04478796187747 | -0.49375419718186 |
| C | -2.51370788826973 | -0.12820152052741 | -1.58034337369208 |
| C | 3.52938788948638  | 1.82916722897934  | 0.47618925918704  |
| H | -0.89045573222789 | 0.53983036654995  | 2.48160431743361  |
| H | -1.27641671910120 | 3.11005762715155  | -3.44735387525539 |
| H | 0.50131992582381  | 4.13200190530058  | -2.73640459116654 |
| H | 0.66746259766329  | 2.16994086679688  | -3.61795361667516 |
| H | -0.89179536490556 | 2.69040558718458  | 2.65981958694571  |
| H | -2.65348906809793 | 1.66481722189615  | 1.91481471782611  |
| H | -1.74287739945764 | -1.96930735851420 | -1.85932986710447 |
| H | -5.84046037713441 | -0.19818579517190 | -2.47061603130929 |
| H | 0.15163478628730  | -3.14775836804678 | -1.67377524993814 |
| H | 6.84796629845501  | 1.59516819035730  | 1.22922509834867  |

|   |                   |                   |                   |
|---|-------------------|-------------------|-------------------|
| H | 4.23080918418712  | 5.07665747629042  | 1.50790031166560  |
| H | 6.50211049333649  | 4.00866906298537  | 1.78574502807096  |
| H | 4.99236681183410  | 0.17898161751404  | 0.39440394636434  |
| H | -3.83644057297450 | -1.70047383549061 | -2.34550152041464 |
| H | 2.58490282686169  | -3.15204750035705 | -1.04173520058831 |
| H | -3.31746928021389 | 3.02103366286163  | -0.95567522197407 |
| H | -5.58461491419815 | 2.24797477955882  | -1.75400723019363 |
| H | 3.66441142590859  | -1.04159639199658 | -0.21391602122476 |
| H | 1.54894021885722  | 4.41188789060183  | 0.66503374359763  |

---

### 2a-dft-PH3

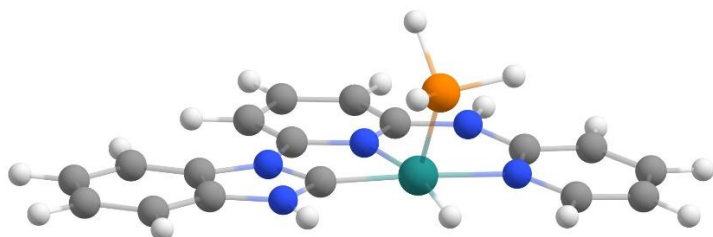

|    |                   |                   |                   |
|----|-------------------|-------------------|-------------------|
| Ru | -0.57935778565612 | 1.84539004985051  | -0.25296832432622 |
| H  | -1.15059884335097 | 3.37570534546358  | -0.15123560189765 |
| P  | -1.30346428350950 | 2.04959954642698  | 1.79587549831694  |
| N  | 0.45909725909395  | 0.05494279110808  | -0.69070992156452 |
| N  | 2.23126757374350  | 1.31935874057791  | 0.09326023798003  |
| N  | -2.37785355263405 | 1.10247637874058  | -1.11351495998469 |
| N  | 1.91113941431555  | 3.38379260767262  | 0.79758831649151  |
| N  | -1.45881968556560 | -1.11135200832786 | -1.49393299386748 |
| C  | -0.10019155587456 | -1.07207010658535 | -1.19232103004767 |
| C  | -4.83006584179994 | 0.19014735714221  | -2.19044850388308 |

|   |                   |                   |                   |
|---|-------------------|-------------------|-------------------|
| C | 0.67173106200419  | -2.24318369565926 | -1.42085372673954 |
| C | 5.85530992055441  | 2.09029400695504  | 0.94435472367611  |
| C | 4.32526226542876  | 3.95437976096124  | 1.39707712106566  |
| C | 5.62221825430562  | 3.40734189080887  | 1.39776133950571  |
| C | 3.28372904351485  | 3.13721501285690  | 0.93358528245345  |
| C | 1.23226903954621  | 2.31555389690738  | 0.28149362688355  |
| C | 4.80796807137977  | 1.27024348456907  | 0.47693170136662  |
| C | -3.73175327224028 | -0.66254685925958 | -2.09944980756186 |
| C | 1.80983561927448  | 0.08117526748416  | -0.41547426531615 |
| C | 2.03583732160571  | -2.21038039046404 | -1.12509838765149 |
| C | -3.47201246038688 | 1.92635135058148  | -1.21801694529937 |
| C | -4.69844433747845 | 1.52254301548936  | -1.73930500737481 |
| C | 2.62995159501268  | -1.03620385297274 | -0.61645375940542 |
| C | -2.50557272105251 | -0.18473657174219 | -1.55417370064125 |
| C | 3.50702404453885  | 1.80481080844263  | 0.47901094504595  |
| H | -0.99453984108312 | 1.03067119142509  | 2.77721926017540  |
| H | -0.93436924754497 | 3.19394845248532  | 2.59298867157188  |
| H | -2.73280073988704 | 2.10101581903509  | 1.99274256314279  |
| H | -1.74778740232082 | -2.03201178539612 | -1.84237265521516 |
| H | -5.78223548483169 | -0.17606639746843 | -2.61209088688523 |
| H | 0.20248585901850  | -3.15507451793009 | -1.82917876176838 |
| H | 6.88267523773399  | 1.68733611333612  | 0.95182902140921  |
| H | 4.13576390661404  | 4.98442850520044  | 1.74431521357746  |
| H | 6.46839258594271  | 4.01899653727946  | 1.75511210441829  |
| H | 5.03715899205877  | 0.25407487636813  | 0.12452450221561  |

|   |                   |                   |                   |
|---|-------------------|-------------------|-------------------|
| H | -3.80526531203404 | -1.70805443737023 | -2.44911606353075 |
| H | 2.65711260491853  | -3.10656884708399 | -1.29410885248820 |
| H | -3.30884770965979 | 2.95482605858896  | -0.85529265581017 |
| H | -5.53555078998530 | 2.23788809376492  | -1.79355066122928 |
| H | 3.70152359778829  | -1.01528446698113 | -0.38118521234908 |
| H | 1.44708759850225  | 4.27680697771884  | 0.99062255554128  |

---

### NPS-C-(H)-PH3

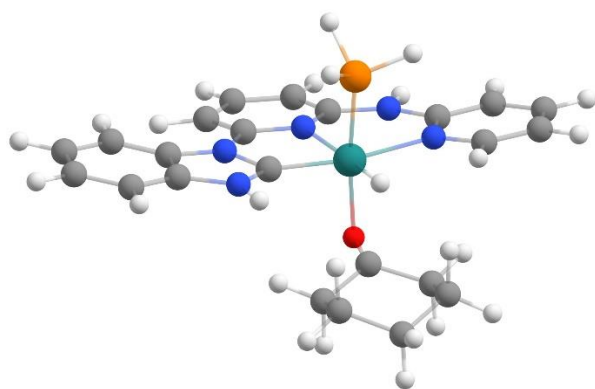

|    |                   |                  |                   |
|----|-------------------|------------------|-------------------|
| Ru | 0.06900795454256  | 3.06459127407087 | -0.83496099922070 |
| P  | -0.44562251993177 | 4.95142251263777 | 0.30654897970832  |
| N  | -2.08810425359807 | 0.92698601368500 | 0.54147083871974  |
| N  | 2.99377813213414  | 4.07653815502447 | -0.52184074152238 |
| N  | -2.05554985785384 | 2.71011817855234 | -1.10141990519509 |
| N  | 2.33347776112933  | 2.47555252375230 | 0.83944357584474  |
| N  | 0.16249544871573  | 1.68775962065775 | 0.78452592796756  |
| C  | 3.65454056019428  | 2.80628104286935 | 1.23513072279623  |
| C  | -2.71258684490251 | 1.74023741033820 | -0.40950332344993 |
| C  | 1.68466539397196  | 0.57626528773020 | 2.31632556847636  |
| H  | 2.69071905939639  | 0.45091097728346 | 2.73693243633158  |

|   |                   |                   |                   |
|---|-------------------|-------------------|-------------------|
| C | -4.13893258902055 | 3.30792993924176  | -2.21697265484177 |
| H | -4.65580762592680 | 3.95972969067673  | -2.94039088155805 |
| C | -2.77624692128061 | 3.47718947682196  | -1.97404645484558 |
| H | -2.19630509694068 | 4.25598863201728  | -2.49784134935770 |
| C | 0.63687764174286  | -0.28250665667603 | 2.70230629936956  |
| H | 0.82170056567109  | -1.06553948639400 | 3.45759486862511  |
| C | 1.40323959729708  | 1.55546146941927  | 1.35211725403637  |
| C | -4.10305886141657 | 1.50168788023155  | -0.61475434946472 |
| H | -4.61062402951297 | 0.70132028188765  | -0.04680420009476 |
| C | 4.51649015975223  | 2.36448744561763  | 2.25489224278522  |
| H | 4.22904396191786  | 1.59633678307381  | 2.98744296758194  |
| C | 1.91715240481189  | 3.27490248085935  | -0.25689611623896 |
| C | 4.07267463378127  | 3.83318623326147  | 0.34046964822695  |
| C | 6.20582859925534  | 3.95977926749655  | 1.43186856034962  |
| H | 7.21536883077219  | 4.39591876501022  | 1.52420509179587  |
| C | 5.34397094618109  | 4.41998147071752  | 0.41786502745310  |
| H | 5.65466602465011  | 5.21197745988725  | -0.28482506527685 |
| C | 5.79429108001797  | 2.95518173460880  | 2.33496886226002  |
| H | 6.48568055889970  | 2.62091251247709  | 3.12755233052918  |
| C | -0.62766190280299 | -0.15948688888202 | 2.12202520541158  |
| H | -1.45028743665093 | -0.83671780778261 | 2.41057074616726  |
| C | -4.81665458018244 | 2.28303679391638  | -1.52171920907397 |
| H | -5.89341058269730 | 2.10111254809296  | -1.68311907905120 |
| C | -0.83048473706994 | 0.84257331812401  | 1.13494944066466  |
| H | -2.73319058179690 | 0.22508166668992  | 0.91919983237467  |

|   |                   |                  |                   |
|---|-------------------|------------------|-------------------|
| H | 0.11702695412914  | 4.22058480378426 | -2.00596190657687 |
| O | 0.33147135766894  | 1.22990427018359 | -1.95972765592822 |
| H | -1.68397601867496 | 5.61862499809191 | -0.00751810589365 |
| H | 0.42954218768959  | 6.09069742129981 | 0.23293029335440  |
| H | -0.59397028102292 | 4.92054347262371 | 1.74370674723280  |
| H | 2.99254270540233  | 4.74605377168651 | -1.29762823469151 |
| C | 0.62727306171321  | 2.02067999234461 | -2.93174404044115 |
| C | 2.08739145024123  | 2.25140344961700 | -3.33178294843282 |
| C | -0.36177898660447 | 2.24692445833185 | -4.07864603070410 |
| C | 2.31673203605501  | 3.56710168714958 | -4.10541626492474 |
| H | 2.33442381523406  | 1.39240836281361 | -4.00878940314111 |
| H | 2.75669708479683  | 2.14093133106354 | -2.45288827192796 |
| C | -0.11908641601764 | 3.54890914238125 | -4.87138586970233 |
| H | -0.20527562084406 | 1.37065040932028 | -4.76071737040356 |
| H | -1.40773346521357 | 2.15499495033819 | -3.71817430152576 |
| C | 1.35443709582611  | 3.69405111927721 | -5.30531616820425 |
| H | 3.37564878925253  | 3.62745831589384 | -4.44670352856569 |
| H | 2.14870915455221  | 4.43258318321659 | -3.41769210456376 |
| H | -0.79023301867234 | 3.58077431970854 | -5.75996287283038 |
| H | -0.39988338247667 | 4.41934010434055 | -4.22984308155139 |
| H | 1.50805967640560  | 4.66983739469726 | -5.82060033523720 |
| H | 1.60074092730959  | 2.90685503483988 | -6.05935064362468 |

---

**PS-C(H)-PH3**



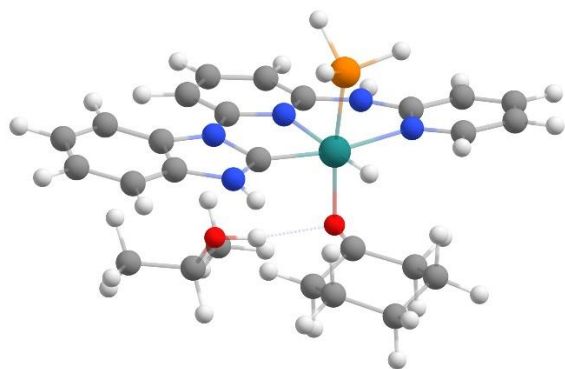

|    |                   |                   |                   |
|----|-------------------|-------------------|-------------------|
| Ru | -0.44867177845515 | 1.83863794940954  | -0.56276025926806 |
| H  | -1.13676589244669 | 3.33009261921094  | -0.47219392440912 |
| P  | -1.25106002916287 | 1.95624838469539  | 1.56126563384214  |
| N  | -1.25254564445145 | -1.28152483451908 | -1.39778263624993 |
| N  | 1.94190635198629  | 3.49126398476761  | 0.56105201782832  |
| N  | -2.30810393069482 | 0.88659323899137  | -1.16138787938084 |
| N  | 2.17885805740186  | 1.30437935162804  | 0.48963938573972  |
| N  | 0.52195729284835  | -0.04504608949080 | -0.38344859056539 |
| C  | 3.37261432358089  | 1.80754662345367  | 1.06052346488006  |
| C  | -2.35863311506956 | -0.43211179043832 | -1.49220200730878 |
| C  | 2.60619821960054  | -1.13389316206282 | 0.21473602530291  |
| H  | 3.63237492393251  | -1.08175689014082 | 0.59811741687483  |
| C  | -4.68970270499322 | 1.08585004168784  | -1.64131743285168 |
| H  | -5.58413126212793 | 1.72949556261736  | -1.67306066323128 |
| C  | -3.46734823569256 | 1.60893710198014  | -1.22164758918637 |
| H  | -3.37322507393587 | 2.66683992599758  | -0.92307947202690 |
| C  | 2.07835923676936  | -2.35294852909064 | -0.24714574037990 |
| H  | 2.69145560405185  | -3.26898322450574 | -0.19458342279633 |
| C  | 1.79818323128840  | 0.00835966371568  | 0.11547814914350  |
| C  | -3.56866190797550 | -1.03057024923698 | -1.95114653164187 |

|   |                   |                   |                   |
|---|-------------------|-------------------|-------------------|
| H | -3.57864191683005 | -2.09957462384606 | -2.23016923943889 |
| C | 4.54843921896904  | 1.22190991992560  | 1.56282489397269  |
| H | 4.71591889343225  | 0.13542554051273  | 1.57718886475676  |
| C | 1.29502072533354  | 2.35952864466364  | 0.15657238141430  |
| C | 3.20825478798731  | 3.22152394236178  | 1.10053657130861  |
| C | 5.37270682009288  | 3.48235255415475  | 2.10007050535302  |
| H | 6.17398766721341  | 4.12167284184656  | 2.50885303304178  |
| C | 4.19347963770167  | 4.07735584647955  | 1.61272890225618  |
| H | 4.05051016926241  | 5.17127371025929  | 1.63293490620694  |
| C | 5.54128968279878  | 2.08042805182904  | 2.07710332940503  |
| H | 6.47244778078153  | 1.63907621842582  | 2.47228749840381  |
| C | 0.78993601655121  | -2.40870935607034 | -0.78670759619023 |
| H | 0.37237072794142  | -3.36000653793005 | -1.15942087389186 |
| C | -4.73396816135508 | -0.27062682691973 | -2.03096711098659 |
| H | -5.67297366650730 | -0.73100444191236 | -2.38434246204122 |
| C | 0.02642103015516  | -1.21344761137163 | -0.84629565990578 |
| H | -1.46981987254489 | -2.22457239752483 | -1.73655980770401 |
| O | 0.09668446172121  | 1.67724558815031  | -2.64486128489131 |
| C | -0.20936786005097 | 2.94680195978333  | -2.59997733368845 |
| C | 0.90263374127407  | 4.00086676022080  | -2.61826138375694 |
| C | -1.49833683934678 | 3.43310779279132  | -3.26959311874061 |
| C | 0.43797804445480  | 5.38128918494616  | -2.10943117486500 |
| H | 1.18710990847589  | 4.10002779787123  | -3.69835572945634 |
| H | 1.81611637438128  | 3.62663070367774  | -2.11135372576776 |
| C | -1.95957188098083 | 4.82601995419945  | -2.79288527559059 |

|   |                   |                   |                   |
|---|-------------------|-------------------|-------------------|
| H | -1.24652161592316 | 3.48760273090921  | -4.36060782802519 |
| H | -2.30089617797749 | 2.67084001611842  | -3.19126471155107 |
| C | -0.82157558989450 | 5.86628490691922  | -2.85858020332127 |
| H | 1.26346422562227  | 6.12241455699993  | -2.21294100302778 |
| H | 0.19761907642312  | 5.31256746538564  | -1.01855147010793 |
| H | -2.82922215308329 | 5.16400712949777  | -3.40158974898441 |
| H | -2.32300533058908 | 4.74703445115460  | -1.73897641838246 |
| H | -1.16716479957187 | 6.84083408954096  | -2.44386031007113 |
| H | -0.55799992945714 | 6.06269178258545  | -3.92652612405424 |
| C | 2.98519585809562  | -0.72844158213732 | -3.84933236606470 |
| C | 3.64941246769946  | 0.58612619678659  | -3.39761655553328 |
| H | 3.69861576429585  | 1.27533828535987  | -4.28518840856569 |
| H | 1.95249838423152  | -0.55000681078173 | -4.22788493673307 |
| H | 3.56086338169133  | -1.21216965789184 | -4.67086116156362 |
| H | 2.92208847042826  | -1.44765766577299 | -3.00069092291490 |
| C | 5.07890056033984  | 0.37662600220745  | -2.88211099860488 |
| H | 5.51611948571001  | 1.33834967820338  | -2.53410329542740 |
| H | 5.09082721805964  | -0.33631995082579 | -2.02532410751995 |
| H | 5.73626648947883  | -0.03385375281615 | -3.68012462183512 |
| O | 2.90366994760636  | 1.21249184088398  | -2.34113413392995 |
| H | 1.95664524442457  | 1.30919858804050  | -2.62380308829554 |
| H | -0.98989205227360 | 0.88327445436595  | 2.49188947512520  |
| H | -2.67653628690751 | 2.04439252180528  | 1.74969029339176  |
| H | -0.85580139662016 | 3.04925139726600  | 2.40650410326007  |
| H | 1.54404560082467  | 4.42441843100144  | 0.41401348921807  |

---

**NPS-TS-II(H)-PH3**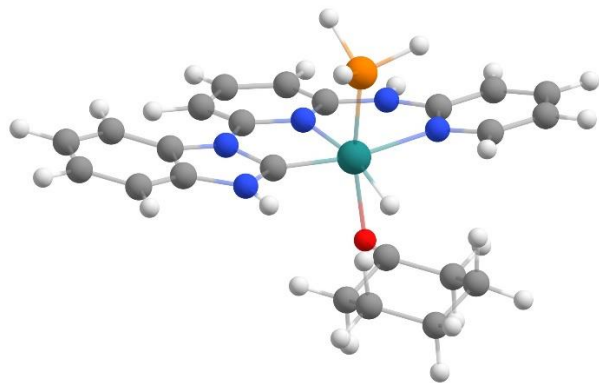

|    |                   |                   |                   |
|----|-------------------|-------------------|-------------------|
| Ru | -0.30314138779952 | 1.73308351846614  | -0.78664868115723 |
| H  | -0.75866906390857 | 3.30652035020552  | -1.35819495056596 |
| P  | -1.03439188882392 | 2.03701278090351  | 1.35817917974311  |
| N  | -1.32622988917067 | -1.36549735808632 | -1.33834514978646 |
| N  | 2.15270320451413  | 3.35924457311952  | 0.23005374748705  |
| N  | -2.24573498475688 | 0.86104761820706  | -1.22605202388023 |
| N  | 2.33781659263744  | 1.16573951950814  | 0.17159785161633  |
| N  | 0.55731765295343  | -0.13326998964018 | -0.51484794987192 |
| C  | 3.53160682676001  | 1.64199207636913  | 0.77006730938851  |
| C  | -2.39726764630532 | -0.47359369421491 | -1.42622132401010 |
| C  | 2.65484962277781  | -1.28931316610870 | -0.05017656938232 |
| H  | 3.71374871493163  | -1.25203905115913 | 0.23708040445609  |
| C  | -4.64087299478869 | 1.16755250853685  | -1.54871758944615 |
| H  | -5.49730883835976 | 1.86110464203680  | -1.57603280937497 |
| C  | -3.36078350710796 | 1.64755734016348  | -1.27060014106315 |
| H  | -3.19001773434505 | 2.71903935545548  | -1.06854093631670 |
| C  | 2.05126311230260  | -2.50632878037355 | -0.41631218952730 |

|   |                   |                   |                   |
|---|-------------------|-------------------|-------------------|
| H | 2.63464301236127  | -3.44219997251142 | -0.38460099815630 |
| C | 1.87622721526505  | -0.12532495192426 | -0.11255291382721 |
| C | -3.66963695740297 | -1.03685404437079 | -1.73139037506409 |
| H | -3.76181635460650 | -2.12469871411689 | -1.90058679986756 |
| C | 4.67474257239745  | 1.02505988825006  | 1.30811455306471  |
| H | 4.80213807696689  | -0.06701714305285 | 1.34211726256515  |
| C | 1.46878022180392  | 2.23605424139237  | -0.15360925595392 |
| C | 3.40363878301673  | 3.06037143033664  | 0.79144178161307  |
| C | 5.55310321082897  | 3.26627083162012  | 1.83761962727088  |
| H | 6.36297598952521  | 3.88685863020477  | 2.25820640298558  |
| C | 4.40398466519733  | 3.89140469233816  | 1.31562385566061  |
| H | 4.29421613842164  | 4.98932121924384  | 1.32309941917191  |
| C | 5.68032428111715  | 1.85995854431802  | 1.83771804420465  |
| H | 6.58668646158820  | 1.39650960382094  | 2.26389653372706  |
| C | 0.71921811067902  | -2.52606958467244 | -0.83723382707718 |
| H | 0.23639600919184  | -3.47235173537740 | -1.13711413202213 |
| C | -4.79291094156554 | -0.21331911848401 | -1.79881125196698 |
| H | -5.78211531135496 | -0.64338790957751 | -2.03333849786705 |
| C | -0.00934289014284 | -1.30918734395369 | -0.88865673778731 |
| H | -1.60047855458191 | -2.31973607406379 | -1.59448255619944 |
| O | 0.03377696974940  | 1.76970702838843  | -2.85251673707990 |
| C | -0.32332237497486 | 3.04452490412079  | -2.73306886053672 |
| C | 0.78524091267036  | 4.11579064607148  | -2.86832273090537 |
| C | -1.61409366728710 | 3.49635643208597  | -3.45684813585433 |
| C | 0.32225550678830  | 5.51568204149551  | -2.41560580814617 |

|   |                   |                  |                   |
|---|-------------------|------------------|-------------------|
| H | 1.03893455377842  | 4.14026284308301 | -3.95659507094153 |
| H | 1.70961243978643  | 3.78180662043703 | -2.35158331346179 |
| C | -2.08562726695394 | 4.89923220359924 | -3.02192088865702 |
| H | -1.35019155551343 | 3.50414201436844 | -4.54292490137823 |
| H | -2.41108109623097 | 2.73053991656388 | -3.34873589358913 |
| C | -0.96372951102748 | 5.95252700778903 | -3.15099797851090 |
| H | 1.13508108618130  | 6.26033979973970 | -2.57782265368173 |
| H | 0.12427680172988  | 5.50405785298109 | -1.31218002319296 |
| H | -2.97482747889505 | 5.20434886236322 | -3.61963590461247 |
| H | -2.43072979701067 | 4.86002353261832 | -1.95732827575435 |
| H | -1.31402862807159 | 6.93777240501973 | -2.76672648005861 |
| H | -0.72859885774803 | 6.10910880024625 | -4.23176186786992 |
| H | -0.66352456759550 | 3.22170227550674 | 2.09169710598459  |
| H | -2.45514734444244 | 2.09775210993068 | 1.60538118042642  |
| H | -0.70948743014657 | 1.08778251838217 | 2.40191788293645  |
| H | 1.77294977499689  | 4.30222545240053 | 0.10223104210065  |

---

**PS-TS-II(H)-PH3**

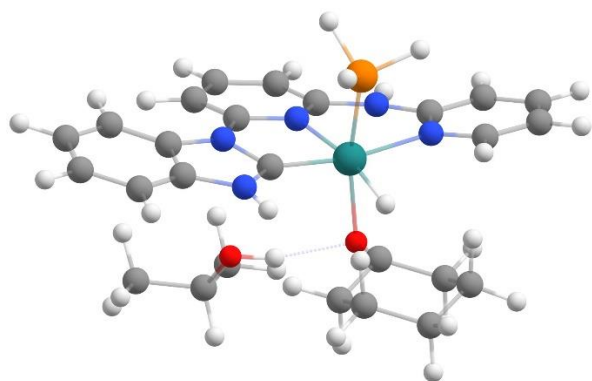

|    |                   |                  |                   |
|----|-------------------|------------------|-------------------|
| Ru | -0.34693927946394 | 1.73895571696764 | -0.66708591971357 |
| H  | -0.81665522925089 | 3.31178578485621 | -1.14567344531824 |

|   |                   |                   |                   |
|---|-------------------|-------------------|-------------------|
| P | -1.16458085026980 | 2.00459641217458  | 1.44198166731446  |
| N | -1.24928051612344 | -1.36425322582802 | -1.36871432392613 |
| N | 2.06183423302606  | 3.39125672627631  | 0.43301822640935  |
| N | -2.24222004766665 | 0.82929259317694  | -1.21604310946366 |
| N | 2.22432644895663  | 1.19839674064551  | 0.48616254182124  |
| N | 0.53310164550322  | -0.12266358984707 | -0.36023065770071 |
| C | 3.41181481030964  | 1.68968357200228  | 1.07774298077512  |
| C | -2.34152475404742 | -0.50094548571622 | -1.47552060986575 |
| C | 2.60605048330706  | -1.24478700980094 | 0.25262454637147  |
| H | 3.63490937313913  | -1.19600723173389 | 0.63078316872292  |
| C | -4.62967334117134 | 1.07470364193371  | -1.63826340553092 |
| H | -5.50642674451301 | 1.74188171546716  | -1.67605261495449 |
| C | -3.38057619197083 | 1.58120843254836  | -1.27897620497026 |
| H | -3.25478877867706 | 2.64778617213796  | -1.02502382582771 |
| C | 2.06345936718147  | -2.46267624706880 | -0.19327296494724 |
| H | 2.66298987853395  | -3.38690124999965 | -0.13282135422542 |
| C | 1.81492565894744  | -0.09256917448975 | 0.14364597784154  |
| C | -3.57902349211198 | -1.08804936651451 | -1.86802556823378 |
| H | -3.62725142845539 | -2.16995164864239 | -2.08635779079093 |
| C | 4.53871468085788  | 1.08912817943533  | 1.66617227876645  |
| H | 4.65527817347270  | -0.00091873293580 | 1.75484465180044  |
| C | 1.39166953702294  | 2.25946817058588  | 0.06370513074391  |
| C | 3.29750673000567  | 3.10812742995199  | 1.03447380218688  |
| C | 5.42748728134678  | 3.34458781147136  | 2.11175424767234  |
| H | 6.23514763583904  | 3.97672029530752  | 2.51918471295434  |

|   |                   |                   |                   |
|---|-------------------|-------------------|-------------------|
| C | 4.29313644136026  | 3.95438550810416  | 1.54186525778575  |
| H | 4.19245978379233  | 5.05231318126203  | 1.49766257596444  |
| C | 5.54215255373704  | 1.93858345002145  | 2.17577426125809  |
| H | 6.43685303343464  | 1.48722166982511  | 2.63811383959246  |
| C | 0.77390130129328  | -2.50037565748000 | -0.73090709679617 |
| H | 0.33995192953388  | -3.44793944074976 | -1.09432107796475 |
| C | -4.72409385270194 | -0.29750836214078 | -1.95617127681570 |
| H | -5.68626647580075 | -0.74686893887377 | -2.25748951716247 |
| C | 0.02595175669491  | -1.29759549399393 | -0.80940341143159 |
| H | -1.47930660208310 | -2.31379904918091 | -1.67967796968582 |
| O | 0.08637010845400  | 1.80419455953199  | -2.74465420493182 |
| C | -0.29446909490738 | 3.07103283812082  | -2.58679438608562 |
| C | 0.79661422256711  | 4.16056846396112  | -2.65066958326941 |
| C | -1.57575920531475 | 3.52213405505523  | -3.31804410276772 |
| C | 0.29882769077659  | 5.53227765671500  | -2.15261868699833 |
| H | 1.06413803087884  | 4.23810878068694  | -3.73389391823289 |
| H | 1.72233522617784  | 3.81541207689638  | -2.14455997218730 |
| C | -2.08321830440341 | 4.89869611537901  | -2.84143096747533 |
| H | -1.28881109971207 | 3.57725433285392  | -4.39732038428760 |
| H | -2.35983453141978 | 2.73843339191166  | -3.25830348901066 |
| C | -0.97805473412732 | 5.97592483129981  | -2.90029754675246 |
| H | 1.10216857546480  | 6.29563284279621  | -2.26740179532186 |
| H | 0.07466937385803  | 5.47345355756772  | -1.05597612391081 |
| H | -2.96229993094289 | 5.21076605845939  | -3.45017238438488 |
| H | -2.45358915664378 | 4.81047637736957  | -1.78865774943083 |



|   |                   |                   |                   |
|---|-------------------|-------------------|-------------------|
| H | -1.35610632860189 | 6.93800713502201  | -2.48511098147133 |
| H | -0.72032413506980 | 6.18080774507426  | -3.96770382178922 |
| C | 3.03341818867444  | -0.65527815351648 | -3.75400263255936 |
| C | 3.67203856153934  | 0.68661948317952  | -3.34740087959533 |
| H | 3.76690277651915  | 1.32122463854724  | -4.27134798561925 |
| H | 2.01725116282003  | -0.50376504471477 | -4.18507529355298 |
| H | 3.64589810636240  | -1.17897530590733 | -4.52283490920843 |
| H | 2.93779823030182  | -1.32909350751135 | -2.87159077599924 |
| C | 5.07251836566886  | 0.51415785016889  | -2.74543413009477 |
| H | 5.49629850462483  | 1.49847685094403  | -2.44756607191032 |
| H | 5.03498557930230  | -0.13057094172436 | -1.83672310674566 |
| H | 5.76850768188010  | 0.04373359192209  | -3.47461667920490 |
| O | 2.87347876766067  | 1.37177675110333  | -2.37056081958695 |
| H | 1.94252783741137  | 1.46267390707464  | -2.70645753033177 |
| H | -0.83519224614629 | 1.06049740181687  | 2.48791403110187  |
| H | -2.59459073225494 | 2.00641050886614  | 1.63584693039684  |
| H | -0.86332185253793 | 3.20050285724785  | 2.18679132790891  |
| H | 1.70170920815119  | 4.33055499464725  | 0.23959090065362  |

---

**NPS-D(H)-PH3**

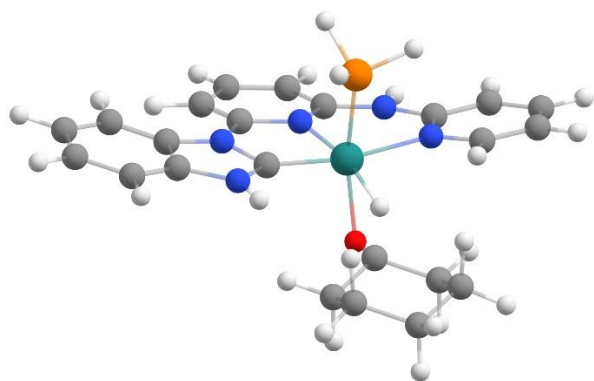

|    |                   |                   |                   |
|----|-------------------|-------------------|-------------------|
| Ru | -0.42134739241801 | 1.47899044028740  | -0.98042223831534 |
| H  | -0.71202688180232 | 2.99857248370946  | -1.78744903785278 |
| P  | -1.06420233930499 | 2.15752319038888  | 1.10877039778403  |
| N  | -1.81656249109202 | -1.51558733524670 | -1.09885459129095 |
| N  | 2.23191836590749  | 2.92223505429476  | -0.21131512506077 |
| N  | -2.46371950033471 | 0.79874445969736  | -1.28888660775839 |
| N  | 2.14972345295900  | 0.73677494854591  | 0.04566144270988  |
| N  | 0.21385756358650  | -0.41802271839639 | -0.45073466067018 |
| C  | 3.40386952917024  | 1.14364843680183  | 0.56704822772064  |
| C  | -2.77562452684143 | -0.52246296304630 | -1.30826674551831 |
| C  | 2.16155257209839  | -1.74481103233924 | 0.18086360730595  |
| H  | 3.22086784773337  | -1.79739927038914 | 0.46394996979097  |
| C  | -4.80948480397624 | 1.34492817998508  | -1.65108956891247 |
| H  | -5.57782117493241 | 2.12627118478055  | -1.77100728706693 |
| C  | -3.47734085746806 | 1.70074187171380  | -1.43800875320226 |
| H  | -3.17833505174671 | 2.76156601374352  | -1.37913487946471 |
| C  | 1.40898604059656  | -2.91815968570674 | -0.00924095378291 |
| H  | 1.87412419603904  | -3.90439330844048 | 0.15853057773470  |
| C  | 1.53011712069011  | -0.51492095213759 | -0.05044412915158 |

|   |                   |                   |                   |
|---|-------------------|-------------------|-------------------|
| C | -4.11015280590529 | -0.96488449123730 | -1.53738581939350 |
| H | -4.33374549750035 | -2.04653723634309 | -1.56039890208550 |
| C | 4.47498297222079  | 0.47456918493598  | 1.18490263929252  |
| H | 4.47097275987959  | -0.60889506105979 | 1.37484529437293  |
| C | 1.41045809091459  | 1.84777083729663  | -0.42862139315799 |
| C | 3.44846363636409  | 2.55552313053740  | 0.38469402637547  |
| C | 5.62771584202789  | 2.64391571570021  | 1.38464829615254  |
| H | 6.51492405548632  | 3.21429623888432  | 1.70933560058830  |
| C | 4.55200783720438  | 3.32409837463430  | 0.78136367001774  |
| H | 4.57556703434927  | 4.41698586910986  | 0.63124758497313  |
| C | 5.58443345803427  | 1.24706480597217  | 1.58625319905354  |
| H | 6.43674349971282  | 0.74151733611152  | 2.07191923017587  |
| C | 0.07875561180439  | -2.83390887526630 | -0.42786060583003 |
| H | -0.51994556103095 | -3.74682980268862 | -0.59094054744710 |
| C | -5.12809826296268 | -0.02860577212890 | -1.71569398575128 |
| H | -6.16478420403606 | -0.36407772225688 | -1.89239088585925 |
| C | -0.49716248062115 | -1.55694388342863 | -0.65530241102882 |
| H | -2.20567490353801 | -2.45615039691963 | -1.22251936378797 |
| O | -0.13134383342489 | 1.20020373681559  | -3.03085321057171 |
| C | -0.33564729637136 | 2.51614074600451  | -3.08405092358454 |
| C | 0.89033496016134  | 3.41618321323532  | -3.37194617479009 |
| C | -1.57387022801782 | 3.00952495425702  | -3.87108228619413 |
| C | 0.60320300749447  | 4.91192972984409  | -3.12820599759454 |
| H | 1.12963130953038  | 3.25225001852798  | -4.45125692157533 |
| H | 1.77514756557490  | 3.05165874570118  | -2.80897827213410 |

|   |                   |                  |                   |
|---|-------------------|------------------|-------------------|
| C | -1.86967182902400 | 4.50657978152291 | -3.64564928145181 |
| H | -1.32612236900605 | 2.82798453764749 | -4.94564625742905 |
| H | -2.45399952590730 | 2.36771815724223 | -3.65447108580957 |
| C | -0.63258448374808 | 5.38834448836853 | -3.92268132902830 |
| H | 1.49579788456054  | 5.52314471908715 | -3.39516469504406 |
| H | 0.42190291288471  | 5.08453345758299 | -2.03540941346286 |
| H | -2.72467484600633 | 4.82580569779786 | -4.28443429759483 |
| H | -2.20268748675318 | 4.66381482294972 | -2.58802364238818 |
| H | -0.85767562991613 | 6.45344722213315 | -3.68621696951980 |
| H | -0.39632675070915 | 5.35786757336578 | -5.01403574125562 |
| H | -0.78057147140624 | 1.34834795761520 | 2.27453408712710  |
| H | -0.57857674378650 | 3.40186697489455 | 1.65101871763586  |
| H | -2.46675743279844 | 2.37100425492385 | 1.37305231244964  |
| H | 1.96697953540137  | 3.87680196038356 | -0.47276388944314 |

---

### PS-D(H)-PH3

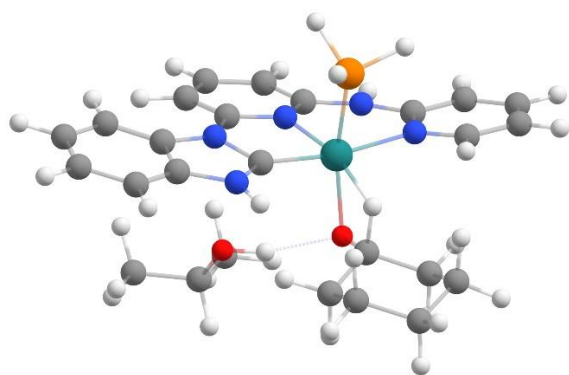

|    |                   |                   |                   |
|----|-------------------|-------------------|-------------------|
| Ru | -0.32503250179572 | 1.72845903339560  | -0.60995391162835 |
| H  | -0.76761991281344 | 3.34273944401542  | -1.25752041784704 |
| P  | -1.14636694851698 | 1.91393614722360  | 1.51518445855974  |
| N  | -1.22674986737857 | -1.34754694340323 | -1.35463194595012 |

|   |                   |                   |                   |
|---|-------------------|-------------------|-------------------|
| N | 2.07308669835411  | 3.39301623398362  | 0.50082208883032  |
| N | -2.21539912651947 | 0.84077299537494  | -1.18738548029236 |
| N | 2.25197393545100  | 1.20126570362677  | 0.52417352782299  |
| N | 0.55569308432856  | -0.10585866599134 | -0.33498349822151 |
| C | 3.44343426495861  | 1.69280147134660  | 1.10803791439945  |
| C | -2.31649334937368 | -0.48361780515469 | -1.46912156988240 |
| C | 2.62699125308687  | -1.23990859723329 | 0.27344683337043  |
| H | 3.65416704688729  | -1.19476604799892 | 0.65648882567577  |
| C | -4.59391760564529 | 1.10599114648101  | -1.63839571781364 |
| H | -5.46730588092362 | 1.77744410693198  | -1.67732817604063 |
| C | -3.34753951353648 | 1.60063407180168  | -1.25340700924342 |
| H | -3.22150890284516 | 2.66232702171231  | -0.97783954109384 |
| C | 2.08232348173153  | -2.45429600728513 | -0.17819659892285 |
| H | 2.67839116635758  | -3.38084805014617 | -0.12136271773204 |
| C | 1.84094049002271  | -0.08453494928465 | 0.17003624156884  |
| C | -3.55013444534785 | -1.05928626315775 | -1.88837475484725 |
| H | -3.60052609150091 | -2.13716524043622 | -2.12512143082481 |
| C | 4.58317311509796  | 1.09286125624664  | 1.67132497080150  |
| H | 4.71116387361176  | 0.00268977679515  | 1.74030893961976  |
| C | 1.40912541444394  | 2.26021540361853  | 0.12433536086593  |
| C | 3.31793988496427  | 3.11075506567510  | 1.08489831121319  |
| C | 5.46032195144032  | 3.34892880318027  | 2.13647412082635  |
| H | 6.26878169445949  | 3.98169766130863  | 2.54130280574773  |
| C | 4.31379042118651  | 3.95774369777007  | 1.59032849060309  |
| H | 4.20473782515647  | 5.05537205272730  | 1.56166460866172  |

|   |                   |                   |                   |
|---|-------------------|-------------------|-------------------|
| C | 5.58700805615239  | 1.94317140860214  | 2.17877899070410  |
| H | 6.49206966096369  | 1.49257039707047  | 2.62124326095980  |
| C | 0.79341390639243  | -2.48335809136821 | -0.71724240863124 |
| H | 0.35639762753562  | -3.42709036270903 | -1.08686622128489 |
| C | -4.68971138192845 | -0.26066114471835 | -1.97939554077277 |
| H | -5.64986711175651 | -0.70006829161138 | -2.30112097484986 |
| C | 0.04659385733264  | -1.28013338157156 | -0.79197684822783 |
| H | -1.45178686767015 | -2.29566670661711 | -1.67352316816754 |
| O | 0.10242525776455  | 1.89399471493862  | -2.66106395248019 |
| C | -0.31953640367069 | 3.17171086447943  | -2.49371386235233 |
| C | 0.76445419873650  | 4.27435062478953  | -2.58976460399036 |
| C | -1.57717977129789 | 3.58418958134483  | -3.29683702144352 |
| C | 0.23688369133082  | 5.65136167318211  | -2.13755667702265 |
| H | 1.05267609792086  | 4.31939210711231  | -3.66832335613852 |
| H | 1.68486671949238  | 3.96225400830932  | -2.05209241037585 |
| C | -2.11846488718817 | 4.96353667371136  | -2.86591436856231 |
| H | -1.25445778564975 | 3.61493068027227  | -4.36584581301810 |
| H | -2.35471888142629 | 2.79299882844826  | -3.24041372885249 |
| C | -1.02894108486301 | 6.05685777479237  | -2.92444550631585 |
| H | 1.03147887803410  | 6.42357689315615  | -2.25400294318295 |
| H | -0.00707718840422 | 5.61864553149254  | -1.04366998741476 |
| H | -2.98748842151886 | 5.24703003208388  | -3.50252337897693 |
| H | -2.51500277594796 | 4.89591275732774  | -1.82063830747193 |
| H | -1.43137186511597 | 7.02258736884470  | -2.54175487910143 |
| H | -0.74945887418788 | 6.23976104327200  | -3.99036653858078 |

|   |                   |                   |                   |
|---|-------------------|-------------------|-------------------|
| C | 2.85515498198177  | -0.58304110576878 | -3.74371709248941 |
| C | 3.58031802091681  | 0.71919066091833  | -3.35155157554440 |
| H | 3.67465645286601  | 1.35548323422300  | -4.27461383995549 |
| H | 1.82921547647269  | -0.37406014917702 | -4.12420510808459 |
| H | 3.40379464203785  | -1.12710338654475 | -4.54614590633992 |
| H | 2.76718076327749  | -1.26409351583189 | -2.86600217285569 |
| C | 4.99178639091164  | 0.46345390428636  | -2.80705617280442 |
| H | 5.47754509569125  | 1.41942525883507  | -2.51153148496849 |
| H | 4.95404771430702  | -0.19339908498370 | -1.90696372416916 |
| H | 5.63398067401181  | -0.03131737831551 | -3.56887339916456 |
| O | 2.85852238982451  | 1.43759510176113  | -2.34106067557683 |
| H | 1.92130051067570  | 1.58358924337955  | -2.64532407377229 |
| H | -0.77328250806778 | 0.95636282828952  | 2.53418450875432  |
| H | -2.57434476329622 | 1.85063965915634  | 1.71760356872434  |
| H | -0.89575097044719 | 3.09844454911613  | 2.29877678184400  |
| H | 1.70632902246457  | 4.33275267289780  | 0.32320588372736  |

---

### E(H)-PH3

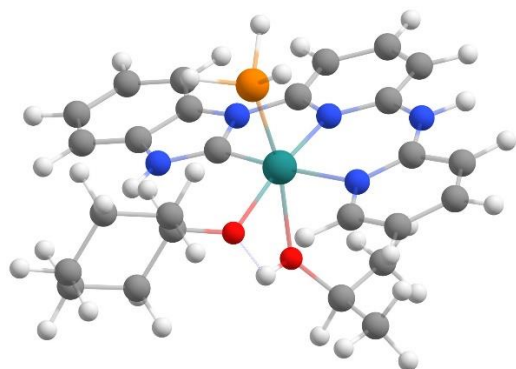

|    |                  |                  |                   |
|----|------------------|------------------|-------------------|
| Ru | 0.01017041678338 | 1.33822882230482 | -1.08724894150868 |
|----|------------------|------------------|-------------------|

|   |                   |                   |                   |
|---|-------------------|-------------------|-------------------|
| H | 0.19192303071863  | 4.45754645755311  | -1.07729181041802 |
| P | -1.17952733163620 | 2.08321248916723  | 0.66374538121399  |
| N | -1.27242700963401 | -1.67075670309525 | -0.67108955926283 |
| N | 2.43681323483200  | 3.11287232129557  | -0.28335412436015 |
| N | -1.74462222849641 | 0.36363528206327  | -1.87905139678503 |
| N | 2.40556563524902  | 1.04258249027725  | 0.46110814999060  |
| N | 0.62958409474918  | -0.33640630496906 | -0.07710846291918 |
| C | 3.62245505785164  | 1.60383169568009  | 0.92506352335122  |
| C | -2.07329132943324 | -0.90584307896127 | -1.52886854818621 |
| C | 2.39579190046568  | -1.29729285528007 | 1.31016093759839  |
| H | 3.35190986687088  | -1.18959211601655 | 1.83786736664325  |
| C | -3.76354819511843 | 0.51740146902415  | -3.21785560410389 |
| H | -4.40188494699530 | 1.12282272977152  | -3.88248643268776 |
| C | -2.57958014129874 | 1.05429058484063  | -2.70856647286230 |
| H | -2.21597825506084 | 2.07239914337918  | -2.94912817554814 |
| C | 1.69622093448719  | -2.51876203301209 | 1.33989920166887  |
| H | 2.11089976952459  | -3.37842683329070 | 1.89295515971339  |
| C | 1.83556171782269  | -0.23327385634542 | 0.59204474986727  |
| C | -3.26009799013460 | -1.52123280157138 | -2.01584936749499 |
| H | -3.50502958968074 | -2.55776828578803 | -1.72207687093188 |
| C | 4.70287851516474  | 1.12558872547911  | 1.68812063555096  |
| H | 4.74833530208700  | 0.10046832350115  | 2.08388818322107  |
| C | 1.67211762121110  | 1.98465368499212  | -0.29672968984941 |
| C | 3.62869206937775  | 2.94271632547082  | 0.43635665165141  |
| C | 5.76378571626540  | 3.33891399344489  | 1.45589972012875  |



|   |                   |                   |                   |
|---|-------------------|-------------------|-------------------|
| H | 6.61680100732967  | 4.00348260248819  | 1.67641703654505  |
| C | 4.68758918616537  | 3.82618752661925  | 0.69005969127435  |
| H | 4.67835110152953  | 4.85938303100974  | 0.30297703560954  |
| C | 5.76814154854427  | 2.01325321445023  | 1.94320561092261  |
| H | 6.62583078410730  | 1.65665966735469  | 2.53918429601149  |
| C | 0.47726182337487  | -2.63835055269070 | 0.66793433126794  |
| H | -0.08276474175468 | -3.58965244230888 | 0.68100084758265  |
| C | -4.10860278796081 | -0.80366548949804 | -2.86187148644221 |
| H | -5.03349062104686 | -1.27208536878560 | -3.24157026448373 |
| C | -0.04076352923596 | -1.51941313595332 | -0.03412229299420 |
| H | -1.66822049523731 | -2.60354146200643 | -0.51347512219822 |
| O | -0.37407153193468 | 2.91159559169420  | -2.38792223353463 |
| C | -0.32091782086121 | 4.28830240580851  | -2.07368389930576 |
| C | 0.49311070784254  | 5.06260259543859  | -3.13889268458025 |
| C | -1.73725897397491 | 4.89862496454983  | -1.93602638264271 |
| C | 0.54012286001492  | 6.57989765811329  | -2.84948108631095 |
| H | 0.02155350417661  | 4.87626733323550  | -4.13508697807370 |
| H | 1.52512170712426  | 4.63809952478393  | -3.20288750848999 |
| C | -1.69484883290265 | 6.41165034201115  | -1.63112105649176 |
| H | -2.28272618444819 | 4.72244359821380  | -2.89611234178262 |
| H | -2.30932719620406 | 4.35207823339045  | -1.14792676803373 |
| C | -0.87549790807573 | 7.17475621537543  | -2.69345560079183 |
| H | 1.09981233230173  | 7.10592796125512  | -3.65697749529635 |
| H | 1.11952212293664  | 6.76122421483063  | -1.90893726582240 |
| H | -2.72972925415767 | 6.82013139411894  | -1.56669786724337 |

|   |                   |                   |                   |
|---|-------------------|-------------------|-------------------|
| H | -1.23856718474243 | 6.57592389186754  | -0.62266775365672 |
| H | -0.81338500410968 | 8.25646546926693  | -2.43289731086361 |
| H | -1.40580681271367 | 7.12278806609835  | -3.67595701264890 |
| C | 0.01093836203098  | -0.11695193519261 | -4.87683189491230 |
| C | 1.27608734007944  | -0.00602559538513 | -4.01475751633841 |
| H | 2.12355071484130  | 0.32230722296887  | -4.66872388660835 |
| H | -0.29361026461303 | 0.87216320680600  | -5.28693931631920 |
| H | 0.20230257497963  | -0.78739408227004 | -5.74452397227420 |
| H | -0.84573932661261 | -0.53833165355221 | -4.30744103561325 |
| C | 1.66951832106711  | -1.32424867433345 | -3.34388984928545 |
| H | 2.55683772655927  | -1.19223255009681 | -2.68687692259687 |
| H | 0.83317599341966  | -1.73661157321257 | -2.73616758573882 |
| H | 1.92818541206930  | -2.08291816789021 | -4.11483866857202 |
| O | 1.16648093039072  | 1.01916882751882  | -2.98146800176285 |
| H | 0.74926794755806  | 1.88349652264302  | -3.30751157633278 |
| H | -0.96443757583299 | 1.51204802641219  | 1.97427543483024  |
| H | -2.61740642545485 | 1.97055440225919  | 0.62818209504869  |
| H | -1.08726286740316 | 3.47174650006216  | 1.04584728524830  |
| H | 2.14605346486148  | 3.97078280261614  | -0.76614722997929 |

---

**TS-III(H)-PH3**

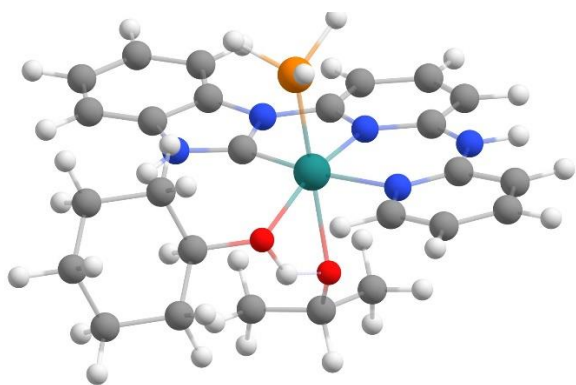

|    |                   |                   |                   |
|----|-------------------|-------------------|-------------------|
| Ru | -0.77982571243300 | -0.52778043129417 | 0.18886956649333  |
| H  | 0.51769740813038  | 2.31479505013940  | -1.10304176723228 |
| P  | -1.85487000196561 | 0.18059049435936  | 2.07459103230589  |
| N  | -2.08317528643099 | -3.55109633991864 | 0.37052204702780  |
| N  | 1.66563974337091  | 1.16970261684330  | 1.12298214788575  |
| N  | -2.67125513989642 | -1.37529058665478 | -0.47640217287450 |
| N  | 1.62597586154379  | -0.95885481243270 | 1.67668874148577  |
| N  | -0.17234228997482 | -2.26615662812380 | 1.05422177411579  |
| C  | 2.79405208318438  | -0.42433378395522 | 2.27571026041401  |
| C  | -2.96425723584350 | -2.68426356189842 | -0.28336107997943 |
| C  | 1.66501042353791  | -3.38168953526628 | 2.22131166200730  |
| H  | 2.66028419628848  | -3.33509945291574 | 2.68126227618979  |
| C  | -4.81194021440485 | -1.06970367240207 | -1.58393769128176 |
| H  | -5.50938045600133 | -0.38685958359135 | -2.09654395291227 |
| C  | -3.58431015157352 | -0.59280087049582 | -1.11944472193785 |
| H  | -3.26895620410729 | 0.45483844175004  | -1.26869142333909 |
| C  | 0.97183560718572  | -4.60327719141304 | 2.13001505361376  |
| H  | 1.41895743744922  | -5.52450665246750 | 2.54016107238540  |
| C  | 1.06144305722327  | -2.23910998936720 | 1.68236812643794  |

|   |                   |                   |                   |
|---|-------------------|-------------------|-------------------|
| C | -4.19201545834544 | -3.24488695928579 | -0.73343649355426 |
| H | -4.40395119031158 | -4.31604326345623 | -0.56488323746614 |
| C | 3.80956766706113  | -0.94753118694547 | 3.09568388251912  |
| H | 3.82610802236242  | -1.99470295406923 | 3.43155033486165  |
| C | 0.91924888104200  | 0.03558573869190  | 0.95335154671372  |
| C | 2.81205280644433  | 0.94981326136236  | 1.90067843020083  |
| C | 4.85349924162401  | 1.28544977671380  | 3.11591619524785  |
| H | 5.67572562026176  | 1.93923535282774  | 3.45416095497164  |
| C | 3.83327607571168  | 1.82082963739882  | 2.30587327911279  |
| H | 3.83580051703023  | 2.88242981060962  | 2.00515345362204  |
| C | 4.83631173372459  | -0.07169229493741 | 3.50521024187848  |
| H | 5.64379874535088  | -0.46270355251162 | 4.14787202079818  |
| C | -0.27893239266911 | -4.64462769726866 | 1.51258327334242  |
| H | -0.83617709363258 | -5.59411984001789 | 1.43196007420740  |
| C | -5.12031554892017 | -2.43142393970552 | -1.38479216634150 |
| H | -6.07685531201396 | -2.85581488709583 | -1.73646249394862 |
| C | -0.83476164957068 | -3.45357364735116 | 0.97485509073663  |
| H | -2.44875559378962 | -4.50828871085618 | 0.40793933040093  |
| O | -1.20336190531688 | 1.11076089407437  | -1.16613689287885 |
| C | -0.60327872687054 | 2.41428636733693  | -1.18806006383656 |
| C | -0.89199251887871 | 3.09953990825919  | -2.54086438935582 |
| C | -1.11538922591233 | 3.27178350218249  | -0.01678074443801 |
| C | -0.29391806722878 | 4.52325749842730  | -2.58899410260007 |
| H | -1.99929332766165 | 3.14391181087831  | -2.68151906024337 |
| H | -0.49022655794380 | 2.47433302331752  | -3.37239922155444 |

|   |                   |                   |                   |
|---|-------------------|-------------------|-------------------|
| C | -0.52320990999212 | 4.69908507383206  | -0.05575752786590 |
| H | -2.22977028516481 | 3.32046279214982  | -0.07953055646292 |
| H | -0.87802218037894 | 2.77512718995442  | 0.95439437024481  |
| C | -0.79136458383573 | 5.38709098457889  | -1.41105439685342 |
| H | -0.54459056002030 | 5.00454445818220  | -3.56156529304113 |
| H | 0.82209111843028  | 4.45873494821228  | -2.55822541966597 |
| H | -0.93626419873332 | 5.30393561574201  | 0.78360168474575  |
| H | 0.58181073530605  | 4.65036741105923  | 0.11903443424084  |
| H | -0.31063572578798 | 6.39176016569553  | -1.43481324034014 |
| H | -1.88910773608825 | 5.56558295469637  | -1.52005324706705 |
| C | 1.30948519014033  | -2.79857725357731 | -2.07475403188334 |
| C | 0.98457176414998  | -1.34218572046220 | -2.44825997250962 |
| H | 0.77744317906710  | -1.31784400790585 | -3.55126481323960 |
| H | 0.43022221755425  | -3.45564036656966 | -2.25462748079826 |
| H | 2.15533598132785  | -3.18589298634361 | -2.68597736644899 |
| H | 1.60429094767216  | -2.89083909613391 | -1.00468684708478 |
| C | 2.17219961648214  | -0.39709624793450 | -2.18256469401536 |
| H | 1.91429882196743  | 0.65911942730960  | -2.42354265689723 |
| H | 2.50974838822489  | -0.44297057267991 | -1.12278711792895 |
| H | 3.04367306349238  | -0.67624320396448 | -2.81701106858280 |
| O | -0.23873217337316 | -0.92121508289651 | -1.83302722684798 |
| H | -0.67418102629333 | 0.33008798382778  | -1.84645989566720 |
| H | -2.18395431575251 | -0.75639484599953 | 3.12888089239226  |
| H | -3.16791050860640 | 0.75565897022829  | 1.92076314415358  |
| H | -1.29172963863398 | 1.19944572914320  | 2.92654943821080  |

H 1.41758395201608 2.05897452038106 0.67699869601119

---

**F(H)-PH3**

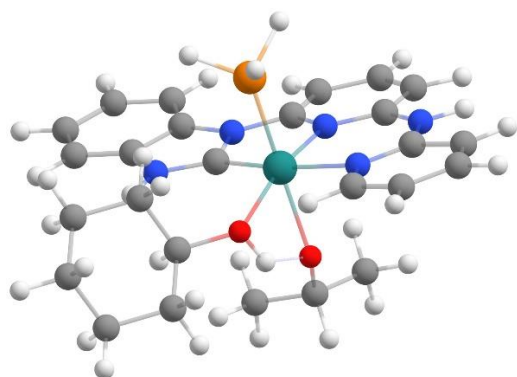

|    |          |          |          |
|----|----------|----------|----------|
| Ru | -0.31962 | 1.24173  | -1.16538 |
| H  | 0.95588  | 4.13186  | -2.46226 |
| P  | -1.40472 | 1.94398  | 0.73085  |
| N  | -1.61179 | -1.78439 | -0.99239 |
| N  | 2.12230  | 2.94846  | -0.24180 |
| N  | -2.21554 | 0.38951  | -1.82991 |
| N  | 2.07750  | 0.82619  | 0.33559  |
| N  | 0.28724  | -0.48705 | -0.29536 |
| C  | 3.24491  | 1.36506  | 0.93145  |
| C  | -2.49554 | -0.92373 | -1.64947 |

|   |          |          |          |
|---|----------|----------|----------|
| C | 2.11658  | -1.59238 | 0.89510  |
| H | 3.10720  | -1.54014 | 1.36431  |
| C | -4.35370 | 0.67963  | -2.94776 |
| H | -5.05626 | 1.35933  | -3.45752 |
| C | -3.13475 | 1.16600  | -2.47036 |
| H | -2.83774 | 2.21997  | -2.60737 |
| C | 1.42731  | -2.81604 | 0.80473  |
| H | 1.87264  | -3.73394 | 1.22411  |
| C | 1.51581  | -0.45404 | 0.34427  |
| C | -3.71258 | -1.49571 | -2.11484 |
| H | -3.91199 | -2.57106 | -1.95812 |
| C | 4.25767  | 0.84886  | 1.75906  |
| H | 4.27155  | -0.19476 | 2.10592  |
| C | 1.37370  | 1.81352  | -0.40140 |
| C | 3.26621  | 2.73492  | 0.54157  |
| C | 5.30580  | 3.07978  | 1.75775  |
| H | 6.12856  | 3.73572  | 2.09047  |
| C | 4.28802  | 3.60826  | 0.93984  |
| H | 4.29350  | 4.66655  | 0.62765  |
| C | 5.28546  | 1.72704  | 2.16133  |
| H | 6.09107  | 1.34124  | 2.80946  |
| C | 0.18237  | -2.86313 | 0.17633  |
| H | -0.37207 | -3.81420 | 0.09535  |
| C | -4.64614 | -0.68796 | -2.76531 |
| H | -5.59444 | -1.12076 | -3.12880 |

|   |          |          |          |
|---|----------|----------|----------|
| C | -0.37134 | -1.67709 | -0.37415 |
| H | -1.96859 | -2.74505 | -0.96066 |
| O | -0.75792 | 2.91628  | -2.51409 |
| C | -0.16358 | 4.23229  | -2.53867 |
| C | -0.47256 | 4.92178  | -3.88296 |
| C | -0.67992 | 5.06437  | -1.35388 |
| C | 0.10210  | 6.35585  | -3.92008 |
| H | -1.58125 | 4.95032  | -4.01584 |
| H | -0.06506 | 4.31175  | -4.72293 |
| C | -0.11129 | 6.50155  | -1.38375 |
| H | -1.79531 | 5.09583  | -1.40735 |
| H | -0.42575 | 4.56124  | -0.39075 |
| C | -0.40155 | 7.19880  | -2.72971 |
| H | -0.16416 | 6.84166  | -4.88606 |
| H | 1.21910  | 6.30984  | -3.89846 |
| H | -0.52845 | 7.08970  | -0.53483 |
| H | 0.99537  | 6.46908  | -1.21738 |
| H | 0.06241  | 8.21133  | -2.74641 |
| H | -1.50282 | 7.36029  | -2.82905 |
| C | 1.61240  | -1.18034 | -3.41091 |
| C | 1.41466  | 0.31317  | -3.73679 |
| H | 1.24448  | 0.38642  | -4.84498 |
| H | 0.68241  | -1.75348 | -3.62098 |
| H | 2.42867  | -1.61812 | -4.02897 |
| H | 1.88907  | -1.33673 | -2.34342 |



|   |          |         |          |
|---|----------|---------|----------|
| C | 2.67894  | 1.13859 | -3.41979 |
| H | 2.51810  | 2.22095 | -3.62650 |
| H | 2.99283  | 1.02683 | -2.35728 |
| H | 3.53516  | 0.80533 | -4.04922 |
| O | 0.22218  | 0.82756 | -3.15075 |
| H | -0.27431 | 2.23804 | -3.19198 |
| H | -1.71614 | 1.00538 | 1.78935  |
| H | -2.72739 | 2.50063 | 0.58738  |
| H | -0.85575 | 2.97207 | 1.58195  |
| H | 1.87770  | 3.83503 | -0.69366 |

---

**1'-dft-PH3**

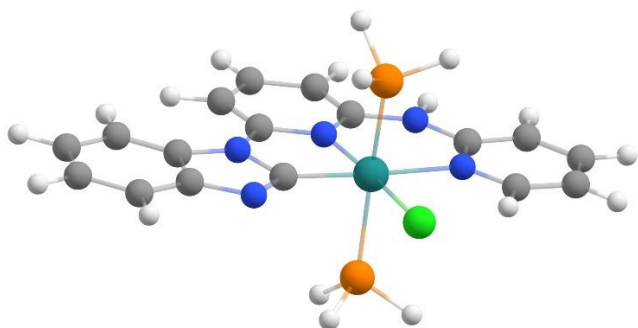

|    |                   |                  |                   |
|----|-------------------|------------------|-------------------|
| Ru | -0.51642351121788 | 1.96412319389673 | -0.50953466887391 |
| Cl | -1.48352752528255 | 4.18630605257842 | -0.16502164891201 |
| P  | -1.06708147746372 | 1.65884468447964 | 1.71891763972036  |
| P  | 0.01777123699796  | 2.79388719060672 | -2.60397939619916 |
| N  | 0.43886922378435  | 0.16365400436645 | -0.74378892015220 |
| N  | 2.25247318428565  | 1.35970985546648 | 0.03451435556549  |
| N  | -2.43304685166825 | 1.17494185760933 | -1.20178654613469 |
| N  | 1.94627888995497  | 3.56503240388160 | 0.53415931608535  |

|   |                   |                   |                   |
|---|-------------------|-------------------|-------------------|
| N | -1.48802964915736 | -1.01469760661376 | -1.55454349527645 |
| C | -0.13708873920962 | -0.97924612976972 | -1.19605826948190 |
| C | -4.92416483045750 | 0.18772872844637  | -2.10645864432294 |
| C | 0.59217872637228  | -2.18849674266986 | -1.32987575310408 |
| C | 5.81580689839675  | 2.05416455742752  | 1.13038201311534  |
| C | 4.32886557407637  | 4.00543607610609  | 1.26056773524882  |
| C | 5.59729492141217  | 3.41762971677712  | 1.43196606312285  |
| C | 3.27376066924132  | 3.20588941539944  | 0.78014535505338  |
| C | 1.31487292129129  | 2.49467068743924  | 0.09211638286846  |
| C | 4.77309854307028  | 1.23297271022724  | 0.64747740742453  |
| C | -3.80408093814129 | -0.64412885641997 | -2.04785261875973 |
| C | 1.78843922910571  | 0.14040890865313  | -0.40536852377735 |
| C | 1.94904875031120  | -2.20388976259900 | -0.98556976215040 |
| C | -3.53712261716371 | 1.97465324940525  | -1.26457480953926 |
| C | -4.78827611618856 | 1.53203926133799  | -1.70415546024929 |
| C | 2.56318843180579  | -1.03253074621008 | -0.51758576463958 |
| C | -2.56166865875818 | -0.12190697957602 | -1.58739641508908 |
| C | 3.50699636019965  | 1.81908551928652  | 0.47640964176333  |
| H | -0.65063674274364 | 0.49499957122040  | 2.47547724387577  |
| H | -1.04079674057892 | 3.06892443126578  | -3.54580385281218 |
| H | 0.67372646825717  | 4.07100712672154  | -2.64193591339480 |
| H | 0.89181705221734  | 2.09505628137945  | -3.52457828219136 |
| H | -0.60544741169218 | 2.66305425841154  | 2.63604042233952  |
| H | -2.45598475934091 | 1.63315048552024  | 2.10947096884796  |
| H | -1.76281931682222 | -1.94789844116616 | -1.87562839299072 |

|   |                   |                   |                   |
|---|-------------------|-------------------|-------------------|
| H | -5.89143631714302 | -0.20925373501544 | -2.46210631377634 |
| H | 0.08856799854021  | -3.09854209941080 | -1.70076568628905 |
| H | 6.81977154719703  | 1.61599610093923  | 1.27308321814429  |
| H | 4.14442831878228  | 5.06878988451891  | 1.49231980724829  |
| H | 6.43661837206805  | 4.03008994013761  | 1.80807301339667  |
| H | 4.98058097614680  | 0.17409874851417  | 0.42289178092717  |
| H | -3.87293601862446 | -1.70370291127840 | -2.35526911712791 |
| H | 2.53443697710122  | -3.13460037576245 | -1.08217839434416 |
| H | -3.35441732291883 | 3.01798000184887  | -0.93482931217403 |
| H | -5.63838822974241 | 2.23440184086786  | -1.72915085224715 |
| H | 3.62628250369936  | -1.02441235824526 | -0.24346555073787 |

---

### 1a'-dft-PH3

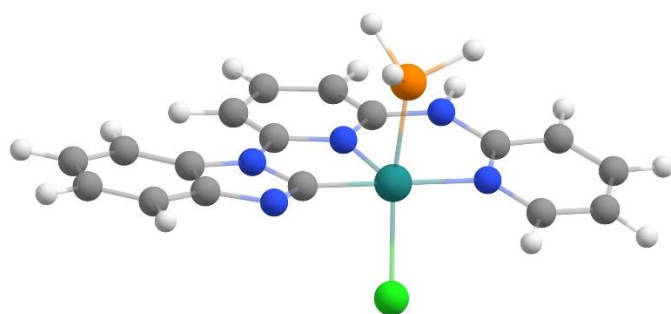

|    |                   |                   |                   |
|----|-------------------|-------------------|-------------------|
| Ru | -0.49164190986623 | 1.90577831944351  | -0.48514810951833 |
| Cl | -0.21530888261026 | 3.02195322565589  | -2.53598388381690 |
| P  | -1.01032553215629 | 1.40705757593344  | 1.66210634461074  |
| N  | 0.43189954279410  | 0.16516908149844  | -0.66645322852955 |
| N  | 2.27527358835794  | 1.38356566891131  | 0.00077192261364  |
| N  | -2.36989315973425 | 1.19279261175657  | -1.24254413886232 |
| N  | 1.89316699539935  | 3.53255712898423  | 0.66164528607386  |
| N  | -1.56648780722385 | -1.06097920704067 | -1.21005919618827 |

|   |                   |                   |                   |
|---|-------------------|-------------------|-------------------|
| C | -0.17732795202001 | -0.99329888898267 | -1.04897839789994 |
| C | -4.89334656513368 | 0.27837333528592  | -2.09089133753807 |
| C | 0.56320406087737  | -2.18306702977417 | -1.25199361666170 |
| C | 5.82470383978333  | 2.12070131431197  | 1.10111808501566  |
| C | 4.27331942415971  | 4.00537290843743  | 1.39301431762589  |
| C | 5.56296852669706  | 3.44941336965063  | 1.50583309566419  |
| C | 3.23923792561833  | 3.20775352641770  | 0.86727924328456  |
| C | 1.30672803699408  | 2.47467405252388  | 0.14128614051672  |
| C | 4.80422780069850  | 1.30199750487943  | 0.56936609910585  |
| C | -3.85356148911126 | -0.62484166522414 | -1.84980540924604 |
| C | 1.81058354202563  | 0.16570704820926  | -0.43142600885104 |
| C | 1.94746207956206  | -2.17463160528681 | -1.03684419104208 |
| C | -3.37878799915565 | 2.06422248999067  | -1.51899149013595 |
| C | -4.65126527074003 | 1.65943302716257  | -1.93278275924512 |
| C | 2.58424601837396  | -0.99589255679922 | -0.62171539364294 |
| C | -2.58678342668950 | -0.13170471443920 | -1.43310388151392 |
| C | 3.51810721092082  | 1.85601349511151  | 0.45981038193057  |
| H | -0.38855700769490 | 0.27788999877959  | 2.33046761257969  |
| H | -0.73615268840533 | 2.38553522462623  | 2.68803683107006  |
| H | -2.37281728039796 | 1.10247145252932  | 2.05109624430555  |
| H | -1.87445701789293 | -2.02150635115772 | -1.39075306413323 |
| H | -5.88210913689073 | -0.09106311221729 | -2.41471745615507 |
| H | 0.04431547005402  | -3.09923512647285 | -1.58360680252312 |
| H | 6.84571210937691  | 1.71033551678916  | 1.19734373085943  |
| H | 4.05979092193395  | 5.04308881420954  | 1.70258749717156  |

|   |                   |                   |                   |
|---|-------------------|-------------------|-------------------|
| H | 6.38644019312441  | 4.06210313168909  | 1.91504826206561  |
| H | 5.04096043956608  | 0.27170842137257  | 0.25654772477902  |
| H | -4.00500821367938 | -1.71030484198770 | -1.99180050352201 |
| H | 2.53705280614956  | -3.09324589641344 | -1.19909631496172 |
| H | -3.12539340328267 | 3.13277622079206  | -1.39594717838563 |
| H | -5.43271657841968 | 2.41150378402443  | -2.13136079798212 |
| H | 3.66894078863736  | -0.96696725318046 | -0.45078565891750 |

---

### A'-PH3

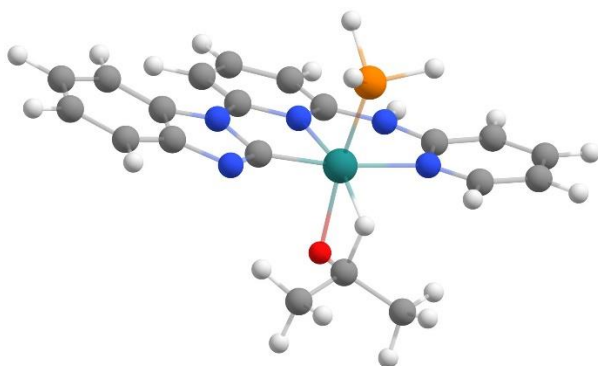

|    |                   |                   |                   |
|----|-------------------|-------------------|-------------------|
| Ru | -0.03649596644407 | 1.44661139012527  | -1.00924665605830 |
| P  | -0.88880778728351 | 1.79568308792937  | 1.06533526006369  |
| N  | -1.76909070210828 | -1.21315489390226 | -1.86579841652480 |
| N  | 2.60097075760710  | 2.39536106134736  | 0.32928034913942  |
| N  | -2.05252568290764 | 1.17344727541798  | -1.76167530492232 |
| N  | 2.23921666798734  | 0.15230758963205  | 0.18155973109495  |
| N  | 0.27610536951694  | -0.56106597631674 | -0.78950377303544 |
| C  | 3.45852776595959  | 0.28751852388986  | 0.86994249903375  |
| C  | -2.55379745676268 | -0.06803850669466 | -2.00458858968968 |
| C  | 1.89898369187883  | -2.27659490084689 | -0.15460005450440 |
| H  | 2.87900089332894  | -2.53921029112808 | 0.26601204912206  |

|   |                   |                   |                   |
|---|-------------------|-------------------|-------------------|
| C | -4.24825332090294 | 2.12241171820682  | -2.24856066602006 |
| H | -4.87528129081839 | 3.02647978533853  | -2.32276651738658 |
| C | -2.90723792910663 | 2.23255419373541  | -1.87349021600026 |
| H | -2.46392766907213 | 3.21633871269767  | -1.63959113404725 |
| C | 1.03998410440999  | -3.26525782893709 | -0.65789106271557 |
| H | 1.33447995322029  | -4.32807052773831 | -0.61336835320645 |
| C | 1.49538814661713  | -0.92885673391516 | -0.23485338828715 |
| C | -3.90608041897347 | -0.26232958841736 | -2.40630583849538 |
| H | -4.27686880843072 | -1.28514785561176 | -2.60137552283399 |
| C | 4.37380439567346  | -0.61149349638837 | 1.44290840793476  |
| H | 4.23152787406487  | -1.70438223755098 | 1.42335313158126  |
| C | 1.74703767608967  | 1.49386261759539  | -0.13134014617743 |
| C | 3.65560536550197  | 1.71061700401254  | 0.93826468484715  |
| C | 5.72343748163625  | 1.32678707799502  | 2.14091110167385  |
| H | 6.62680708413346  | 1.71571168580413  | 2.64464048642009  |
| C | 4.79988437788364  | 2.22808299294915  | 1.57598383116074  |
| H | 4.95149298714268  | 3.32042819139660  | 1.62566056757937  |
| C | 5.51253447204838  | -0.06950730256625 | 2.07900128781734  |
| H | 6.24815890256832  | -0.75517578687748 | 2.53608216126224  |
| C | -0.18580556386940 | -2.90109460939718 | -1.22791775323333 |
| H | -0.87308051404864 | -3.66362103234049 | -1.63455622346166 |
| C | -4.75748931740533 | 0.83759174420278  | -2.53508194478327 |
| H | -5.80764019118110 | 0.69492755160986  | -2.84414244606705 |
| C | -0.53790142215326 | -1.52843763951488 | -1.28354585978973 |
| H | -2.26252364676090 | -2.05557780895597 | -2.17584681437154 |

|   |                   |                  |                   |
|---|-------------------|------------------|-------------------|
| C | -0.45503509974255 | 3.55438190651720 | -3.74627266768350 |
| C | 0.56541444939320  | 2.91712530983374 | -2.76658388563793 |
| H | 0.01116648807821  | 3.15362075530496 | -1.60457391164489 |
| H | -1.35643149336753 | 2.91955192678329 | -3.86691964937775 |
| H | -0.76118963437000 | 4.58065082220919 | -3.43969919505339 |
| H | 0.03412467350615  | 3.63129941686453 | -4.74445183971142 |
| C | 1.85431377859072  | 3.76401379391755 | -2.65374209072326 |
| H | 2.49849863520912  | 3.42408669824548 | -1.81755082090639 |
| H | 2.41348781460947  | 3.66676215539844 | -3.61239559966400 |
| H | 1.61819175045461  | 4.84138284283436 | -2.49771751057028 |
| O | 0.73652906067411  | 1.58806580217795 | -2.94156774928778 |
| H | -2.27281128647246 | 2.20142567822887 | 1.23084398005555  |
| H | -0.30854218296855 | 2.80605668868628 | 1.91779642513287  |
| H | -0.92125723263425 | 0.74812101621228 | 2.07228564795316  |

---

### TS-I'-PH3

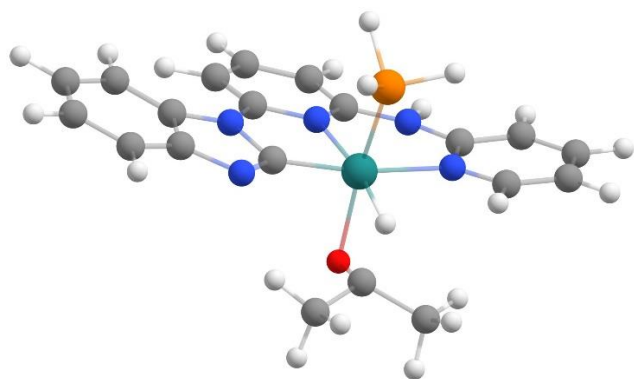

|    |                   |                   |                   |
|----|-------------------|-------------------|-------------------|
| Ru | -0.03033913648943 | 1.48459487393283  | -1.02804513193211 |
| P  | -0.85772648906258 | 1.89110857791717  | 1.03275376736119  |
| N  | -1.75396173255164 | -1.20380063339808 | -1.89257779707044 |
| N  | 2.61910257709409  | 2.40471028259383  | 0.32018787712082  |

|   |                   |                   |                   |
|---|-------------------|-------------------|-------------------|
| N | -2.05219893273939 | 1.18575857006122  | -1.76358368430933 |
| N | 2.23517425147867  | 0.16445643746003  | 0.17442893106760  |
| N | 0.28021991100893  | -0.56098927097227 | -0.80233911969525 |
| C | 3.44826810814357  | 0.29008671684219  | 0.87430327118326  |
| C | -2.54576102595087 | -0.05968458164158 | -2.00851890306377 |
| C | 1.91604436497695  | -2.26509037482960 | -0.18743385315835 |
| H | 2.89973683792807  | -2.52614238265620 | 0.22532251558829  |
| C | -4.26444671226666 | 2.11625500676838  | -2.21667629877083 |
| H | -4.90060785420931 | 3.01505227770281  | -2.27657781344379 |
| C | -2.92012042765921 | 2.23695030719370  | -1.85799472052487 |
| H | -2.48083483177858 | 3.22224674635838  | -1.62565801563928 |
| C | 1.06435608534621  | -3.25389916422173 | -0.70296911924706 |
| H | 1.36888040144435  | -4.31453606851832 | -0.67107700457687 |
| C | 1.49847724794461  | -0.91931518919955 | -0.25196578428692 |
| C | -3.90159870846413 | -0.26261889211155 | -2.39509345607480 |
| H | -4.26531913940559 | -1.28767487760553 | -2.59192874965156 |
| C | 4.34687098570245  | -0.61557830938711 | 1.46413751589339  |
| H | 4.19158417881951  | -1.70676236279427 | 1.45196274188267  |
| C | 1.75617573920386  | 1.51447405698512  | -0.14729191509313 |
| C | 3.65974459152175  | 1.71085961685894  | 0.94093510319003  |
| C | 5.70924880557998  | 1.31130559585025  | 2.16947506375599  |
| H | 6.61058736178415  | 1.69287507725417  | 2.68241936006216  |
| C | 4.80171079039348  | 2.21952989438013  | 1.59003011089004  |
| H | 4.96307494683024  | 3.31056801145889  | 1.63765487346542  |
| C | 5.48345440595799  | -0.08281248497565 | 2.11157094563123  |



|   |                   |                   |                   |
|---|-------------------|-------------------|-------------------|
| H | 6.20520949637421  | -0.77434518391993 | 2.58183281650527  |
| C | -0.16499129579443 | -2.89624637025888 | -1.27029978396433 |
| H | -0.84472661583493 | -3.66080211290475 | -1.68567406379558 |
| C | -4.76540697511609 | 0.82899647724446  | -2.50605189318503 |
| H | -5.81789765103444 | 0.67796188510366  | -2.80306654781182 |
| C | -0.52391623766287 | -1.52424474733826 | -1.30969518623265 |
| H | -2.24656328153220 | -2.04282218187510 | -2.21297379499693 |
| C | -0.47707898397304 | 3.49606568963609  | -3.71290995138646 |
| C | 0.59541159920059  | 2.83163998440930  | -2.82000895305271 |
| H | -0.05472790314371 | 3.14526220229368  | -1.39581819686325 |
| H | -1.35159807090436 | 2.83217401493935  | -3.86440564420562 |
| H | -0.81465527916530 | 4.48252830303103  | -3.32366931729539 |
| H | -0.01460892148611 | 3.67179725305989  | -4.71282864939180 |
| C | 1.84898668862660  | 3.70853727845621  | -2.65148785371252 |
| H | 2.51215384984035  | 3.34683599892966  | -1.84070352470848 |
| H | 2.40559428824965  | 3.68699556684324  | -3.61803921039930 |
| H | 1.57675933017428  | 4.76580300507187  | -2.43509236632536 |
| O | 0.75893338968509  | 1.53274295788075  | -2.99443964374656 |
| H | -2.22949622747313 | 2.33759034441424  | 1.18769597724980  |
| H | -0.24202627153395 | 2.90342501029427  | 1.85423112346398  |
| H | -0.91595152807767 | 0.86568716738265  | 2.06058395330100  |

---

**B'-PH3**

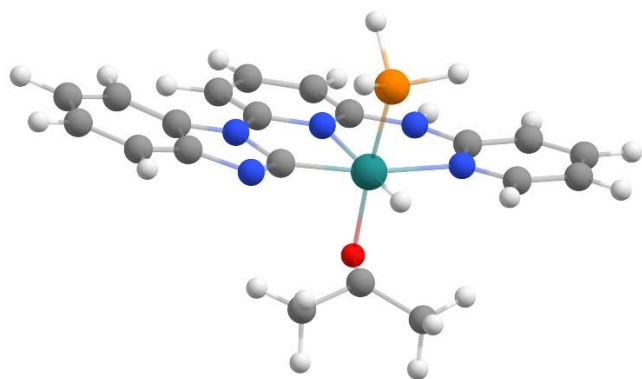

|    |                   |                   |                   |
|----|-------------------|-------------------|-------------------|
| Ru | -0.16447893026516 | 1.56742907421460  | -0.88818079277882 |
| P  | -0.90654652295295 | 1.94490802998669  | 1.20512580284688  |
| N  | -1.79928146198285 | -1.16812558082032 | -1.85526006960267 |
| N  | 2.44649275588781  | 2.49414916407901  | 0.51690601420432  |
| N  | -2.18300355315262 | 1.21005821153533  | -1.61649401758968 |
| N  | 2.20440204766376  | 0.25645682066728  | 0.13269287358333  |
| N  | 0.24585420439333  | -0.51610908462858 | -0.80413062860850 |
| C  | 3.41925777571766  | 0.38936451794527  | 0.82927978796689  |
| C  | -2.61447536177610 | -0.03815609705364 | -1.94835027202830 |
| C  | 1.97183411915540  | -2.16710508356980 | -0.34373854441243 |
| H  | 2.98168233408882  | -2.41103595817676 | 0.01198367086255  |
| C  | -4.40204592617611 | 2.08936877538125  | -2.12482750083439 |
| H  | -5.06689118321480 | 2.96786685114777  | -2.17245321745032 |
| C  | -3.08053422036262 | 2.23597293091922  | -1.69932919260299 |
| H  | -2.67706845677815 | 3.22103511777949  | -1.40780965990881 |
| C  | 1.13153930981361  | -3.16476545368465 | -0.86255676783005 |
| H  | 1.47774932357500  | -4.21294084226183 | -0.88933997812733 |
| C  | 1.49858364615345  | -0.83665923820636 | -0.32667877438728 |
| C  | -3.94651157298595 | -0.26409505797261 | -2.40642991002441 |

|   |                   |                   |                   |
|---|-------------------|-------------------|-------------------|
| H | -4.26429772896707 | -1.28778610850881 | -2.67672053759530 |
| C | 4.39090035209274  | -0.50918992648541 | 1.30333439466386  |
| H | 4.31451365868249  | -1.60037849244518 | 1.16867944547380  |
| C | 1.63818841204346  | 1.60715536250503  | -0.04523431331543 |
| C | 3.53829207663557  | 1.80663523608000  | 1.04751269101298  |
| C | 5.63427241001256  | 1.41839455883754  | 2.20052727818957  |
| H | 6.51808420732589  | 1.80338943229938  | 2.74077882751103  |
| C | 4.65644249875003  | 2.31886716186500  | 1.73502286554077  |
| H | 4.74509118160664  | 3.40702824152615  | 1.89866861847860  |
| C | 5.50191665879958  | 0.02690078454337  | 1.99131090165218  |
| H | 6.27874687027121  | -0.66038831750563 | 2.37145616572639  |
| C | -0.13620129663615 | -2.83745711945687 | -1.36009625386083 |
| H | -0.80164269546402 | -3.61227043892166 | -1.77965487448976 |
| C | -4.84195915203227 | 0.80098603289885  | -2.49976198033629 |
| H | -5.87353979639463 | 0.62999410269347  | -2.85429225305535 |
| C | -0.54126276852107 | -1.47696043777132 | -1.32664391115512 |
| H | -2.27268295753441 | -2.00550998290717 | -2.20734084811071 |
| C | -0.34590733813765 | 3.51931185615641  | -3.50647086395433 |
| C | 0.63196313810353  | 2.56305587786399  | -2.80933992972985 |
| H | -0.40113758658758 | 3.19244087539862  | -0.77566405347678 |
| H | -1.37877487817107 | 3.11784208088065  | -3.52545189555771 |
| H | -0.34527563028374 | 4.52904291599785  | -3.04163355627300 |
| H | -0.01478731781798 | 3.63980289711351  | -4.56782953047162 |
| C | 2.05330756459358  | 3.11357328533481  | -2.67735495125851 |
| H | 2.76128338303159  | 2.31787780607756  | -2.37178546152805 |

|   |                   |                  |                   |
|---|-------------------|------------------|-------------------|
| H | 2.37387760801662  | 3.50607315838899 | -3.67430657355109 |
| H | 2.11985824570701  | 3.94524838692497 | -1.94431152090456 |
| O | 0.44993237681498  | 1.28359564049655 | -2.93672893808249 |
| H | -2.23160420655806 | 2.49151744925450 | 1.40476117566502  |
| H | -0.17218285316150 | 2.86196290995655 | 2.03337290258635  |
| H | -1.02514276302187 | 0.87139767362681 | 2.17290815692832  |

---

### 2a'-dft-PH3

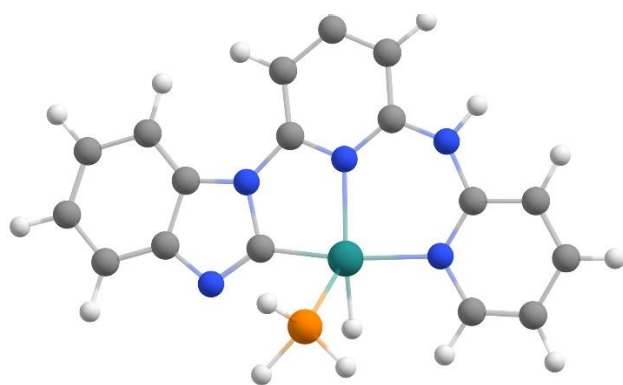

|    |                   |                   |                   |
|----|-------------------|-------------------|-------------------|
| Ru | -0.58127154078616 | 1.74150973165960  | -0.18142155257048 |
| H  | -0.96910463219134 | 3.27951918042380  | -0.47111714080246 |
| P  | -1.34246217427088 | 2.63983528545586  | 1.65194647689886  |
| N  | 0.48658172813690  | -0.00775773199635 | -0.73193662733743 |
| N  | 2.25884602118855  | 1.22784624427241  | 0.07907733947239  |
| N  | -2.37485896137459 | 0.98637557507423  | -1.02569261659033 |
| N  | 1.84559967844691  | 3.28155734210817  | 0.99485596666746  |
| N  | -1.42493654213967 | -1.18146282183910 | -1.54428839850608 |
| C  | -0.05609605887036 | -1.11198435375886 | -1.29581593416262 |
| C  | -4.86540483155171 | 0.03875460036897  | -2.02961066116188 |
| C  | 0.73357495693461  | -2.24042628764402 | -1.64299352876728 |
| C  | 5.84521055081082  | 2.02272790444513  | 1.02604649449388  |

|   |                   |                   |                   |
|---|-------------------|-------------------|-------------------|
| C | 4.24026679859042  | 3.78279563067607  | 1.62343188134154  |
| C | 5.55747932934376  | 3.28485526909561  | 1.59182665360723  |
| C | 3.20549685150514  | 2.99562550165268  | 1.07964723259244  |
| C | 1.24115550032928  | 2.26186337443333  | 0.39584183391476  |
| C | 4.82390726405905  | 1.21602549506606  | 0.47473022986842  |
| C | -3.73647981553124 | -0.78045340273682 | -2.01933093339078 |
| C | 1.85413295105934  | 0.05022282421311  | -0.49873294206762 |
| C | 2.11041166196390  | -2.18188630850711 | -1.39669743604564 |
| C | -3.49738152953389 | 1.78033440968085  | -1.07069648549905 |
| C | -4.73784756710190 | 1.36025771994634  | -1.54273377879166 |
| C | 2.69166001094999  | -1.03774944677530 | -0.82460910274453 |
| C | -2.50032270876972 | -0.28669964668683 | -1.51448688136640 |
| C | 3.50905300560796  | 1.70889690308979  | 0.51082556357254  |
| H | -1.16676070101168 | 1.93438381966962  | 2.90913758447555  |
| H | -0.86350625281964 | 3.92332705975946  | 2.10378246014268  |
| H | -2.76714973599415 | 2.89133663575170  | 1.81262675601409  |
| H | -1.69602678288565 | -2.08976105996257 | -1.93345988277858 |
| H | -5.82699008303908 | -0.33962916746735 | -2.41735692622060 |
| H | 0.27213656952516  | -3.13205689881378 | -2.10213153038360 |
| H | 6.88621055273281  | 1.65354897536062  | 1.01000178373122  |
| H | 4.00300698588869  | 4.76902671459592  | 2.05887474546677  |
| H | 6.38042658466089  | 3.89006649236617  | 2.01326690792018  |
| H | 5.08821721760824  | 0.23959206247748  | 0.03727367278218  |
| H | -3.79258792261827 | -1.81662962436035 | -2.40078473626958 |
| H | 2.74976942513454  | -3.04303615748954 | -1.65994875206608 |

|   |                   |                   |                   |
|---|-------------------|-------------------|-------------------|
| H | -3.34677019216289 | 2.80671615201544  | -0.69701382562656 |
| H | -5.59046022499867 | 2.05992012553037  | -1.53626760941636 |
| H | 3.77150461317446  | -0.99638812115087 | -0.63124630039656 |

---

### 2'-dft-PH3

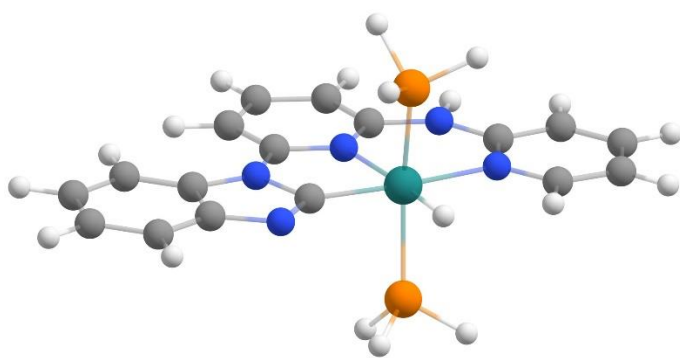

|    |                   |                   |                   |
|----|-------------------|-------------------|-------------------|
| Ru | -0.53831138738013 | 1.94554981898781  | -0.52350204152297 |
| H  | -1.19384962553175 | 3.44577449182756  | -0.29265047185937 |
| P  | -1.12341378993589 | 1.79029276551706  | 1.68712035546259  |
| P  | -0.04754772214823 | 2.90817054597740  | -2.54480667798395 |
| N  | 0.46130223918429  | 0.09543606189504  | -0.75617671227302 |
| N  | 2.24738146981385  | 1.32754400823804  | 0.02187798945942  |
| N  | -2.40585515602139 | 1.13704362146932  | -1.21516890674945 |
| N  | 1.93729992724204  | 3.53546002225016  | 0.52476096057705  |
| N  | -1.46729645101789 | -1.06850380698060 | -1.55528653151822 |
| C  | -0.11055089393651 | -1.04342613826851 | -1.20056295554057 |
| C  | -4.89990435673959 | 0.14524227645348  | -2.12521865386487 |
| C  | 0.61955947676262  | -2.25234564921693 | -1.32904247119228 |

|   |                   |                   |                   |
|---|-------------------|-------------------|-------------------|
| C | 5.81236984237869  | 2.03571712443454  | 1.10749839070366  |
| C | 4.32009286775365  | 3.98102165431429  | 1.24480507504366  |
| C | 5.59124641664152  | 3.39803172660449  | 1.41166199996839  |
| C | 3.26491141230029  | 3.17917416712752  | 0.76704759000952  |
| C | 1.30056075778896  | 2.46413048271335  | 0.08088459135352  |
| C | 4.76976255351020  | 1.21258214054251  | 0.62746985598516  |
| C | -3.77896755571916 | -0.68530830125086 | -2.05562478822489 |
| C | 1.79967655019018  | 0.09610571781325  | -0.41343453863521 |
| C | 1.97738502662509  | -2.25019987787775 | -0.97920540515678 |
| C | -3.51451354095375 | 1.93277922735765  | -1.29080845449913 |
| C | -4.76582194113970 | 1.49277587844931  | -1.73194349167735 |
| C | 2.58589650907784  | -1.07355949073606 | -0.51587259381227 |
| C | -2.53468892994066 | -0.16672420257384 | -1.59450360971080 |
| C | 3.49983320873429  | 1.79281308153228  | 0.46113585965597  |
| H | -0.73161740370047 | 0.70033378167127  | 2.56599396247777  |
| H | -1.11363364848907 | 3.24703469873139  | -3.46342779501573 |
| H | 0.59451013939721  | 4.19542476725556  | -2.52188412740496 |
| H | 0.82226174190223  | 2.31645830673383  | -3.54850471264222 |
| H | -0.68921922002184 | 2.85262926137452  | 2.55462325048737  |
| H | -2.51843950951834 | 1.79110006953825  | 2.07316417742770  |
| H | -1.75205358622544 | -2.00023146601949 | -1.87208123548827 |
| H | -5.86551586379933 | -0.25398498789200 | -2.48197440301878 |
| H | 0.12674479788710  | -3.17020785404710 | -1.69542654351736 |
| H | 6.81810532307468  | 1.59990308908537  | 1.24541366596398  |
| H | 4.13383592009782  | 5.04393691052706  | 1.47799317941613  |

|   |                   |                   |                   |
|---|-------------------|-------------------|-------------------|
| H | 6.42996161374240  | 4.01294499267972  | 1.78539780493611  |
| H | 4.98103674358374  | 0.15526880265689  | 0.39989168230014  |
| H | -3.84903623252133 | -1.74666907112070 | -2.35673271488847 |
| H | 2.57047418884905  | -3.17712531200355 | -1.06820764045695 |
| H | -3.34398596743056 | 2.97479144839429  | -0.97004278913058 |
| H | -5.61488956107831 | 2.19574485260880  | -1.76504671942227 |
| H | 3.64824361671155  | -1.06372963677465 | -0.23904340602141 |

---

### NPS-C'-PH3

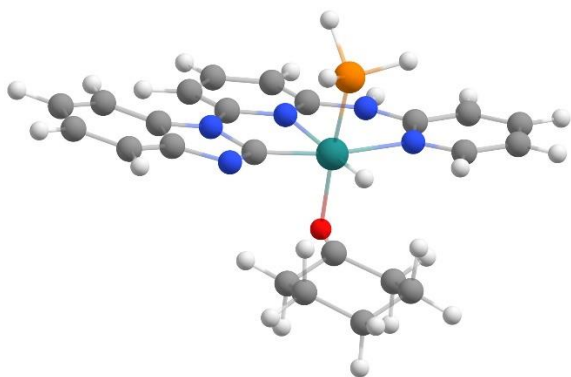

|    |                   |                  |                   |
|----|-------------------|------------------|-------------------|
| Ru | 0.04251416339987  | 2.98564327486946 | -0.88609673362251 |
| P  | -0.32948901836209 | 4.93990399467428 | 0.16971444199801  |
| N  | -2.10650456308636 | 0.86920505918209 | 0.52592407578288  |
| N  | 2.93745811914916  | 4.08236163059195 | -0.61639552201026 |
| N  | -2.09082816154742 | 2.63485110559137 | -1.12934295002007 |
| N  | 2.30950461411689  | 2.42610900192228 | 0.82265355490145  |
| N  | 0.14307908542792  | 1.64353878744122 | 0.75794457631068  |
| C  | 3.61674783342784  | 2.77984631204979 | 1.20332672934755  |
| C  | -2.74849988486214 | 1.68621778961519 | -0.40690408749941 |
| C  | 1.65308294026520  | 0.57365779866000 | 2.33666119559616  |
| H  | 2.65642449199383  | 0.47061670883374 | 2.77098797475744  |



|   |                   |                   |                   |
|---|-------------------|-------------------|-------------------|
| C | -4.20464379996509 | 3.27614961120159  | -2.16784156631414 |
| H | -4.72997025005596 | 3.93683299801780  | -2.87742971156326 |
| C | -2.82824801781081 | 3.41075528144784  | -1.97763436188412 |
| H | -2.24817143394517 | 4.17119551252279  | -2.52843109363861 |
| C | 0.60796732669073  | -0.27484692855066 | 2.73461158031469  |
| H | 0.78752113842666  | -1.03616300960456 | 3.51397219602497  |
| C | 1.38996731909274  | 1.53387707984465  | 1.33519949293718  |
| C | -4.15159822392411 | 1.47877050234090  | -0.55861653124048 |
| H | -4.65432360394114 | 0.69375255837464  | 0.03549738784484  |
| C | 4.49928795559567  | 2.36271169124718  | 2.21480940642358  |
| H | 4.24053050265288  | 1.58564533614439  | 2.95203771848892  |
| C | 1.93259982008905  | 3.26604622678997  | -0.32900152203865 |
| C | 3.97768663360907  | 3.81756375134922  | 0.27459311285541  |
| C | 6.13346312841426  | 3.99848445375311  | 1.36610138139073  |
| H | 7.13285930122071  | 4.46324961126458  | 1.44587338240046  |
| C | 5.24621298720638  | 4.42486953087577  | 0.35882312831463  |
| H | 5.51962414417307  | 5.21894636539372  | -0.35767397013657 |
| C | 5.76463061903307  | 2.98668821413754  | 2.28145186320087  |
| H | 6.47518664081475  | 2.67397695442834  | 3.06734308660240  |
| C | -0.65541954057470 | -0.17268292703057 | 2.13903477573582  |
| H | -1.48185579975898 | -0.84180816394758 | 2.43639951857608  |
| C | -4.88226754410200 | 2.27115571765308  | -1.44371736206365 |
| H | -5.96835634493458 | 2.11327084945667  | -1.56421323755674 |
| C | -0.84509635866668 | 0.80467144456824  | 1.12669261543484  |
| H | -2.74561819472855 | 0.17366747634317  | 0.92226643674667  |

|   |                   |                  |                   |
|---|-------------------|------------------|-------------------|
| H | 0.06656328362098  | 4.15841602512564 | -2.03812366125946 |
| O | 0.32474142239772  | 1.15778614856960 | -1.99281398795359 |
| H | -1.52806939973393 | 5.69434713388600 | -0.12829456859353 |
| H | 0.63049192735564  | 5.99739881215526 | 0.00585160696741  |
| H | -0.44276362939358 | 5.01156963968108 | 1.61353054650470  |
| C | 0.64372034788404  | 2.03339993676729 | -2.89731073604324 |
| C | 2.11311328377667  | 2.23080208735614 | -3.29153919887573 |
| C | -0.31681188675286 | 2.29422982495870 | -4.07263307522915 |
| C | 2.37861577179486  | 3.57065573319013 | -4.00621809666725 |
| H | 2.34025611471904  | 1.38518242117360 | -3.99431367848157 |
| H | 2.77612396848944  | 2.09680154701808 | -2.41307843694645 |
| C | -0.05134981728842 | 3.62486440534434 | -4.80624309349512 |
| H | -0.14523409441218 | 1.44591465300730 | -4.78629242447907 |
| H | -1.37318876166340 | 2.19773727847861 | -3.74317946292726 |
| C | 1.43189642291324  | 3.77272044329297 | -5.20856689406891 |
| H | 3.44078472650794  | 3.61236219254724 | -4.34315855916188 |
| H | 2.25653345038645  | 4.39271659695455 | -3.26343288966214 |
| H | -0.70992399492360 | 3.70581957717215 | -5.70346327196868 |
| H | -0.32811321806389 | 4.46740657549893 | -4.12669957321733 |
| H | 1.60335366724017  | 4.77238243018018 | -5.67313413959213 |
| H | 1.67117239061168  | 3.02017493618881 | -6.00175738724733 |

---

**PS-C'-PH3**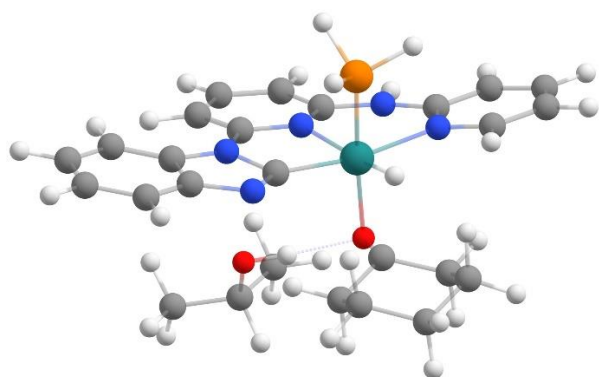

|    |                   |                   |                   |
|----|-------------------|-------------------|-------------------|
| Ru | -0.41275738893137 | 1.84843313639768  | -0.59559996310819 |
| H  | -1.15535741618457 | 3.31230283747684  | -0.50957904678130 |
| P  | -1.19436714698885 | 2.09917508943209  | 1.50656152552074  |
| N  | -1.11934790323448 | -1.29787075519192 | -1.41863512734599 |
| N  | 1.81560734423743  | 3.61236006251612  | 0.66919248005794  |
| N  | -2.23436766631231 | 0.84057973875648  | -1.23779402171017 |
| N  | 2.20654227196563  | 1.36923630511809  | 0.53794470233748  |
| N  | 0.59916089345395  | -0.00636994718025 | -0.37095642030760 |
| C  | 3.32346031050207  | 1.90686645771691  | 1.20042956515445  |
| C  | -2.25121065472493 | -0.48918805606371 | -1.53072023292693 |
| C  | 2.70655101477940  | -1.04305117687051 | 0.25745244010516  |
| H  | 3.72946984918975  | -0.95366952005307 | 0.64518150602921  |
| C  | -4.62391509749052 | 0.95557578158304  | -1.72044428462702 |
| H  | -5.53423539592636 | 1.57566395934521  | -1.77233588387709 |
| C  | -3.41367790999374 | 1.52441979862972  | -1.32081487218504 |

|   |                   |                   |                   |
|---|-------------------|-------------------|-------------------|
| H | -3.34483975161207 | 2.59377131180235  | -1.05660495465297 |
| C | 2.21736701367404  | -2.27360549353005 | -0.20041253620410 |
| H | 2.85438885178196  | -3.17334294689258 | -0.13833241129505 |
| C | 1.87088002920974  | 0.09010418261536  | 0.15272440346548  |
| C | -3.44557883340807 | -1.13652890734472 | -1.96637899484344 |
| H | -3.42362306241164 | -2.21422328792968 | -2.21106978454509 |
| C | 4.49344800786582  | 1.36748752993201  | 1.76207024514289  |
| H | 4.72436710846790  | 0.29029505788311  | 1.74501204448669  |
| C | 1.30065113530858  | 2.48177632170515  | 0.21002507909368  |
| C | 3.04320578585000  | 3.31544265649556  | 1.26505030538716  |
| C | 5.13511214350089  | 3.64710518024204  | 2.43981994180026  |
| H | 5.86564588592715  | 4.31596637166280  | 2.92974079471267  |
| C | 3.95799414133079  | 4.18743919124662  | 1.88662532437735  |
| H | 3.73882861807662  | 5.26848542896152  | 1.93107630273649  |
| C | 5.39645747160559  | 2.25933773405965  | 2.38113355524250  |
| H | 6.32429148392193  | 1.85793238944582  | 2.82649366295662  |
| C | 0.93336171635446  | -2.36787622437416 | -0.75556654908807 |
| H | 0.54157323102516  | -3.33025453644129 | -1.12843552025821 |
| C | -4.63350470450777 | -0.41333913490522 | -2.06753003084858 |
| H | -5.55990035831472 | -0.91076511572310 | -2.40427341572401 |
| C | 0.14918501459761  | -1.18933550349676 | -0.83588909022942 |
| H | -1.30034948245722 | -2.25171142809730 | -1.74528828880740 |
| O | 0.21978092990436  | 1.69931711390587  | -2.65023132399799 |
| C | -0.09410169630861 | 2.97314139867946  | -2.53709377210880 |
| C | 1.02159289380408  | 4.02325991362273  | -2.52583595219751 |

|   |                   |                   |                   |
|---|-------------------|-------------------|-------------------|
| C | -1.36048041448737 | 3.47625153762956  | -3.24953907774592 |
| C | 0.54981297380104  | 5.39188317300375  | -1.99793993747368 |
| H | 1.33688748104216  | 4.12781888802870  | -3.59837793878485 |
| H | 1.90891866773469  | 3.65165084518853  | -1.97577782009230 |
| C | -1.83716637553372 | 4.85469812380153  | -2.74836381556126 |
| H | -1.07723310992921 | 3.56156148948679  | -4.33132471266601 |
| H | -2.16620115856742 | 2.71303862337629  | -3.21111688535065 |
| C | -0.69645644974151 | 5.89546946647791  | -2.75711104630428 |
| H | 1.37851581093216  | 6.13255181467682  | -2.08399339971744 |
| H | 0.33650641154824  | 5.29035460309738  | -0.90890371148300 |
| H | -2.69547955017416 | 5.20954442951717  | -3.36670566775727 |
| H | -2.21977715659656 | 4.74395826061649  | -1.70413340024549 |
| H | -1.05479924818653 | 6.85761436614866  | -2.32085589444176 |
| H | -0.41941395352849 | 6.12288511741719  | -3.81726188588204 |
| C | 2.58522438780914  | -0.85737331180676 | -4.00453011518191 |
| C | 3.41726340158275  | 0.39529998973904  | -3.65469771448484 |
| H | 3.35494625157673  | 1.10115275001608  | -4.53187141660766 |
| H | 1.51305724358920  | -0.59400652990279 | -4.15215189147371 |
| H | 2.94746655958327  | -1.33836618810449 | -4.94306523413735 |
| H | 2.64436560595774  | -1.60800683781267 | -3.18282082871734 |
| C | 4.89900887818655  | 0.05994257529610  | -3.42768183796509 |
| H | 5.46866022380604  | 0.97763453315216  | -3.16138027353595 |
| H | 5.00963293990449  | -0.66336485478481 | -2.58672238783756 |
| H | 5.35869920200653  | -0.38804586186419 | -4.33740452331073 |
| O | 2.94301102649137  | 1.03575496171284  | -2.47334654477040 |

|   |                   |                  |                   |
|---|-------------------|------------------|-------------------|
| H | 1.97658900289287  | 1.25543558264558 | -2.59275053929605 |
| H | -0.91586703613734 | 1.10895647002343 | 2.52680516345912  |
| H | -2.62029651113201 | 2.18418175829526 | 1.73523555464956  |
| H | -0.78791378195839 | 3.26007130979043 | 2.24906638177919  |

---

**NPS-TS-II'-PH3**

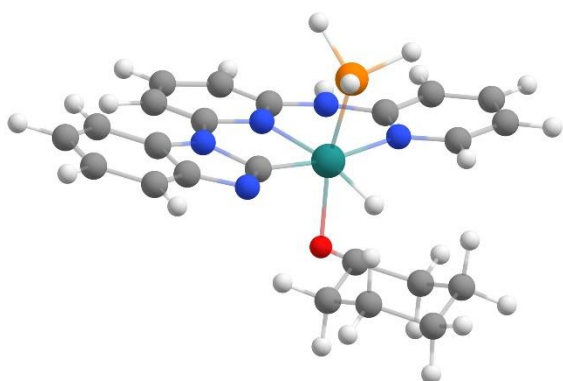

|    |                   |                   |                   |
|----|-------------------|-------------------|-------------------|
| Ru | -0.31059721826492 | 1.72219893328925  | -0.83856125405066 |
| H  | -0.76250408600915 | 3.30150857735193  | -1.28575593619339 |
| P  | -0.99250474000449 | 2.09822938521928  | 1.28093828845733  |
| N  | -1.33563758082763 | -1.37773766502022 | -1.37793116573535 |
| N  | 2.10352547901501  | 3.39794584000320  | 0.17043235371336  |
| N  | -2.24885755235402 | 0.85245751324446  | -1.30505850495556 |
| N  | 2.32351507313727  | 1.12920907919467  | 0.16857676985248  |
| N  | 0.54523971477557  | -0.14953896280298 | -0.54571100894301 |
| C  | 3.51055211186143  | 1.61939842023965  | 0.74161371609502  |
| C  | -2.41058752529746 | -0.49088389011193 | -1.45444255873539 |
| C  | 2.61966998836941  | -1.32291132050364 | -0.01518506407538 |
| H  | 3.66980167049810  | -1.28836965780147 | 0.30475422459452  |
| C  | -4.65974557181738 | 1.14152241373848  | -1.56092848122571 |

|   |                   |                   |                   |
|---|-------------------|-------------------|-------------------|
| H | -5.51526809508264 | 1.83678665177436  | -1.58668401389373 |
| C | -3.36960446127482 | 1.63119699074284  | -1.34470359281604 |
| H | -3.19170799897987 | 2.70923515121127  | -1.18924385181496 |
| C | 2.01496822230195  | -2.53587037892032 | -0.37867777682080 |
| H | 2.58834507607396  | -3.47729297158684 | -0.31857078298453 |
| C | 1.86038875152337  | -0.13814277399224 | -0.11169782092695 |
| C | -3.69226444093880 | -1.06523136771622 | -1.69439696701675 |
| H | -3.78559138903504 | -2.15965755369097 | -1.81816511896961 |
| C | 4.66382632502861  | 1.02618259820769  | 1.28298745585831  |
| H | 4.80688140732389  | -0.06549826889277 | 1.33553996576906  |
| C | 1.47736138155915  | 2.27994937507471  | -0.17130661568595 |
| C | 3.33773161275300  | 3.04737968856930  | 0.72016506611494  |
| C | 5.51157165869538  | 3.28829791268904  | 1.76303600116407  |
| H | 6.31567393871418  | 3.92882919053769  | 2.16836240313946  |
| C | 4.35029096822408  | 3.88270094676151  | 1.23176993355693  |
| H | 4.21646815967422  | 4.97834136642728  | 1.21229702123471  |
| C | 5.66433547394872  | 1.88339948695651  | 1.79224890582181  |
| H | 6.58076468152833  | 1.44118118912625  | 2.22222844726885  |
| C | 0.68953534505670  | -2.55171930555262 | -0.83097213982570 |
| H | 0.19990824937413  | -3.49615076467373 | -1.12668691875614 |
| C | -4.82174661730730 | -0.24694625689221 | -1.75507143806570 |
| H | -5.81756480311621 | -0.68633493738017 | -1.93987720956120 |
| C | -0.01876592942669 | -1.32531033292761 | -0.90963778069279 |
| H | -1.61374857162576 | -2.33591365509715 | -1.60996513069528 |
| O | 0.14523406775864  | 1.79248937359659  | -2.90693228398949 |

|   |                   |                  |                   |
|---|-------------------|------------------|-------------------|
| C | -0.23787090316255 | 3.04665597218912 | -2.74088288083418 |
| C | 0.83711376967159  | 4.15473458372794 | -2.79043619346989 |
| C | -1.53065640340099 | 3.49045923231828 | -3.47280270088445 |
| C | 0.31237343622152  | 5.52195132275676 | -2.31171539595363 |
| H | 1.14345757319330  | 4.21614905269286 | -3.86556622558670 |
| H | 1.73129423474565  | 3.85226569952853 | -2.20969774319348 |
| C | -2.05865344350571 | 4.85932027874127 | -2.99855989128766 |
| H | -1.24879138363959 | 3.55133877409117 | -4.55369603804292 |
| H | -2.30302043588427 | 2.69437434013283 | -3.40781671024667 |
| C | -0.96590596045890 | 5.94882182611214 | -3.06429964660636 |
| H | 1.10769654511668  | 6.29427352710819 | -2.42837130024116 |
| H | 0.11172815273392  | 5.45549225484951 | -1.21492941712810 |
| H | -2.94907209908665 | 5.15864895207514 | -3.60043203264672 |
| H | -2.41510647139681 | 4.76862216770274 | -1.94122972630065 |
| H | -1.35781634286076 | 6.91015458180768 | -2.65597371912227 |
| H | -0.71551443804369 | 6.14805547856862 | -4.13613356967826 |
| H | -0.58359876395315 | 3.30982295092560 | 1.94666373552223  |
| H | -2.40929764626293 | 2.19047664529576 | 1.57881446974019  |
| H | -0.66679219585960 | 1.19839233898293 | 2.37444784974993  |

---

**PS-TS-II'-PH3**



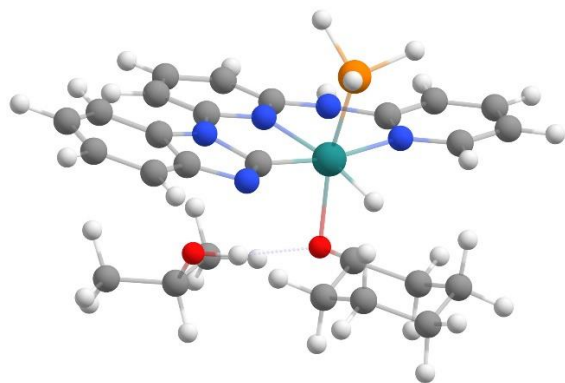

|    |                   |                   |                   |
|----|-------------------|-------------------|-------------------|
| Ru | -0.25835826870836 | 1.77781627063415  | -0.69236229827749 |
| H  | -0.77470670731036 | 3.34469437355545  | -1.06675188244856 |
| P  | -1.10904319742202 | 2.04772051202889  | 1.37902106467848  |
| N  | -1.02906721314292 | -1.35820261538596 | -1.41795394012183 |
| N  | 1.96861647538232  | 3.55819844834917  | 0.54941616964061  |
| N  | -2.09498660703621 | 0.80278841989402  | -1.33792137151735 |
| N  | 2.29140045489359  | 1.30352599558862  | 0.56641282483693  |
| N  | 0.67647049677096  | -0.05502820390582 | -0.35525231832257 |
| C  | 3.39799887539282  | 1.84382795999281  | 1.24323722792023  |
| C  | -2.14868278620946 | -0.53927585798793 | -1.56150689230959 |
| C  | 2.75916792803658  | -1.11635446100244 | 0.34066787710781  |
| H  | 3.77422497566407  | -1.02764378846709 | 0.74992162609619  |
| C  | -4.48789548744233 | 0.94736393748851  | -1.80104639162785 |
| H  | -5.38471651281153 | 1.58511041844020  | -1.87094931875059 |
| C  | -3.26036076440671 | 1.50693005546647  | -1.44013363897905 |
| H  | -3.17367068390964 | 2.58379661646062  | -1.21491248251697 |
| C  | 2.26680428629065  | -2.35005091784402 | -0.10559245167592 |
| H  | 2.89006114893031  | -3.25675439571772 | -0.01549221663604 |
| C  | 1.94161880978611  | 0.02436923256394  | 0.20002874200814  |

|   |                   |                   |                   |
|---|-------------------|-------------------|-------------------|
| C | -3.35998513268838 | -1.18076387238969 | -1.95289538596970 |
| H | -3.36462722835135 | -2.27026614417913 | -2.13884052577759 |
| C | 4.52090595694930  | 1.30018417947753  | 1.88976799496239  |
| H | 4.70947620453126  | 0.21601639505129  | 1.95032725968976  |
| C | 1.43620367909685  | 2.41422458240954  | 0.14411723393536  |
| C | 3.16163706250458  | 3.26163329159074  | 1.21318219374401  |
| C | 5.21109152526188  | 3.59502780617249  | 2.45979945765682  |
| H | 5.94215057362818  | 4.26844052852445  | 2.94269298563396  |
| C | 4.07856626197741  | 4.13937282564183  | 1.82328565411960  |
| H | 3.89553392508714  | 5.22770284477003  | 1.79619010502611  |
| C | 5.42653685582334  | 2.19851244843988  | 2.49581606613228  |
| H | 6.31863643384834  | 1.79560486625890  | 3.00782932083023  |
| C | 0.99326761749164  | -2.43259883817247 | -0.68504932616255 |
| H | 0.59407642940128  | -3.39470029927729 | -1.05076124112599 |
| C | -4.53279329009559 | -0.43543802492036 | -2.08129999143932 |
| H | -5.47401880100201 | -0.92726079885116 | -2.38314420447308 |
| C | 0.22495314876646  | -1.24772946370125 | -0.80564711473173 |
| H | -1.21664230756045 | -2.31972904098840 | -1.71710412875947 |
| O | 0.34377583562236  | 1.93887327293221  | -2.73641580021898 |
| C | -0.12027159672297 | 3.16962467943323  | -2.51878407766251 |
| C | 0.89863559612394  | 4.32315929018555  | -2.45461647689175 |
| C | -1.37986164607344 | 3.57284141474274  | -3.31912578076528 |
| C | 0.27392377598452  | 5.64011819496292  | -1.95658386573659 |
| H | 1.26721692197979  | 4.44702452266852  | -3.50468422499334 |
| H | 1.77015549320896  | 4.03955770339229  | -1.83144026448710 |

|   |                    |                   |                   |
|---|--------------------|-------------------|-------------------|
| C | -2.00953997704215  | 4.89262165583108  | -2.82994777419804 |
| H | -1.03205742857772  | 3.69198261944499  | -4.37580621557076 |
| H | -2.112051391222103 | 2.73781772018431  | -3.33639179033472 |
| C | -0.97247459910632  | 6.03613748617639  | -2.77657046808593 |
| H | 1.03513184718560   | 6.45347243759742  | -1.98903685295849 |
| H | 0.00721429183818   | 5.51642901412421  | -0.87927990525327 |
| H | -2.87063924765759  | 5.17159003538056  | -3.48171123551729 |
| H | -2.43240362980713  | 4.73847629261679  | -1.80510210348961 |
| H | -1.43979393750929  | 6.95803978782487  | -2.35722945978642 |
| H | -0.66272187580638  | 6.29388462814351  | -3.81996272033034 |
| C | 2.37684960500854   | -0.76371829779339 | -3.92009933879139 |
| C | 3.39135253892448   | 0.36234529045284  | -3.62218929180826 |
| H | 3.44773848994780   | 1.01820778761584  | -4.53830682679460 |
| H | 1.35814370814859   | -0.34657075762085 | -4.08659127492805 |
| H | 2.66297725798051   | -1.33870291931886 | -4.83192537028941 |
| H | 2.32272628746297   | -1.47606590360950 | -3.06490365532422 |
| C | 4.80059719447639   | -0.18859701438825 | -3.35520455483733 |
| H | 5.50542016971041   | 0.64118616115372  | -3.12634860372416 |
| H | 4.78909027205096   | -0.87642132436915 | -2.47804073732510 |
| H | 5.19121404631429   | -0.74963471562448 | -4.23416450415652 |
| O | 3.01666662301649   | 1.13443259483514  | -2.48562515611946 |
| H | 2.09820843811420   | 1.49505216512450  | -2.63428389098098 |
| H | -0.78566431663093  | 1.13775222550918  | 2.46265142175426  |
| H | -2.54482463807579  | 2.02950323867215  | 1.57995290309351  |
| H | -0.82835824628609  | 3.26633542771058  | 2.09348121411660  |

---

**NPS-D'-PH3**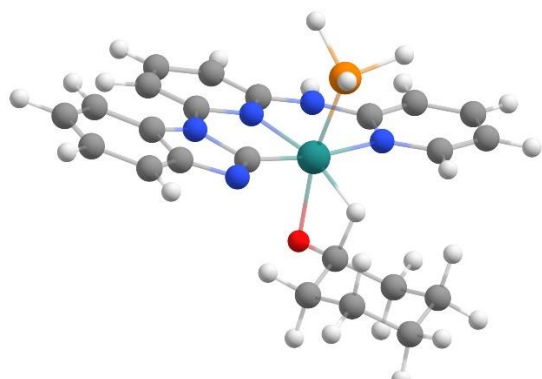

|    |                   |                   |                   |
|----|-------------------|-------------------|-------------------|
| Ru | -0.41750326133207 | 1.43506842429388  | -0.98375654019048 |
| H  | -0.66598462400081 | 2.98608615371255  | -1.83629576876104 |
| P  | -1.02943935286675 | 2.11929334427342  | 1.09078992287139  |
| N  | -1.83219391292537 | -1.53414871928167 | -1.10636533621355 |
| N  | 2.19676656878406  | 2.93285461213954  | -0.23482067240163 |
| N  | -2.45358519403636 | 0.77717418669233  | -1.35203394663543 |
| N  | 2.14559665661724  | 0.67717192478055  | 0.07835358758566  |
| N  | 0.20429603454507  | -0.44373322373200 | -0.45443651529411 |
| C  | 3.40135047648867  | 1.09142949085670  | 0.55798457607790  |
| C  | -2.78853816484058 | -0.54093041020030 | -1.31793252292424 |
| C  | 2.11974463692885  | -1.79275102181936 | 0.24523399904858  |
| H  | 3.16898423750397  | -1.84699175067262 | 0.56527297761364  |
| C  | -4.80733563297769 | 1.33778100477248  | -1.67283939064913 |
| H  | -5.56595704577158 | 2.12736946842065  | -1.80306047339476 |
| C  | -3.46319520245208 | 1.68196903381577  | -1.51084374516918 |
| H  | -3.14864291347882 | 2.74019878442961  | -1.49942977281749 |
| C  | 1.36015755847848  | -2.95701619560240 | 0.05527494086691  |
| H  | 1.80762965591492  | -3.94686825428758 | 0.25094000640393  |

|   |                   |                   |                   |
|---|-------------------|-------------------|-------------------|
| C | 1.51992488199496  | -0.54558253052960 | -0.02167253960232 |
| C | -4.13440939773543 | -0.97366936734117 | -1.49134719648591 |
| H | -4.36936351203691 | -2.05344716079887 | -1.46615251327834 |
| C | 4.49422014787208  | 0.43969061856638  | 1.15397052709750  |
| H | 4.50908729007761  | -0.64449776980368 | 1.35238495758767  |
| C | 1.43449625537267  | 1.86203761280188  | -0.40457580420884 |
| C | 3.39885899508642  | 2.51318426362462  | 0.33921045705556  |
| C | 5.62116449146993  | 2.62484874155288  | 1.29801422771950  |
| H | 6.50968671664426  | 3.21101507949754  | 1.59473147529426  |
| C | 4.52102582975885  | 3.27946538004303  | 0.71029956139309  |
| H | 4.51879806353815  | 4.37013777890491  | 0.53959241877420  |
| C | 5.60712004566272  | 1.22888615071728  | 1.51975290152333  |
| H | 6.47955051123611  | 0.74015756615835  | 1.98902909230383  |
| C | 0.03772656714603  | -2.86245110333512 | -0.39526757284299 |
| H | -0.57435637895317 | -3.76708641279654 | -0.55686816797765 |
| C | -5.14874473674895 | -0.03162710233822 | -1.67646757873299 |
| H | -6.19432144100173 | -0.35958443470150 | -1.81064550325646 |
| C | -0.51174915121789 | -1.57997712838839 | -0.64870971467103 |
| H | -2.22854941394729 | -2.47397099421155 | -1.20076787722706 |
| O | 0.03041351799965  | 1.26977864297122  | -3.02248161340345 |
| C | -0.25264030593433 | 2.58538416145001  | -3.03181016557030 |
| C | 0.93193313987868  | 3.55969107441728  | -3.26450469272588 |
| C | -1.47390876304835 | 2.99851023555994  | -3.90210598734011 |
| C | 0.52780322240760  | 5.03558529109052  | -3.07262923344257 |
| H | 1.26824670635535  | 3.38265037721416  | -4.31607750183783 |

|   |                   |                  |                   |
|---|-------------------|------------------|-------------------|
| H | 1.77511729249475  | 3.29912417719339 | -2.59270368506402 |
| C | -1.87979885043869 | 4.47338988241915 | -3.70716910844321 |
| H | -1.15750554421537 | 2.82926066000790 | -4.96060889568799 |
| H | -2.32369816763569 | 2.30377333687639 | -3.72628343740639 |
| C | -0.68786457298114 | 5.42738966054844 | -3.93899336827275 |
| H | 1.39541128612090  | 5.69868093949334 | -3.29730994099467 |
| H | 0.29306450613512  | 5.20159679903517 | -1.99225028204047 |
| H | -2.72912898043001 | 4.73268544029836 | -4.38247057270868 |
| H | -2.26145653781714 | 4.61813764386020 | -2.66411573485424 |
| H | -0.99169345629730 | 6.48108897950578 | -3.73401545657300 |
| H | -0.39968332238543 | 5.39291610404982 | -5.01914410212061 |
| H | -0.75647710041421 | 1.32929748456344 | 2.27950071529412  |
| H | -0.50539010189558 | 3.35958092837627 | 1.60997776490397  |
| H | -2.42554025269642 | 2.37147214085540 | 1.39720882180581  |

---

### PS-D'-PH3

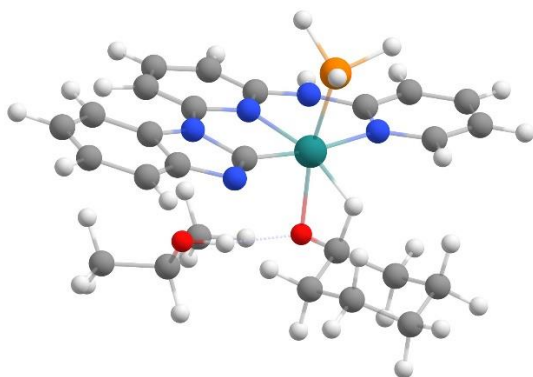

|    |                   |                   |                   |
|----|-------------------|-------------------|-------------------|
| Ru | -0.24443665141447 | 1.73420141291758  | -0.59488215097564 |
| H  | -0.70241089980229 | 3.37383448380481  | -1.22901422753820 |
| P  | -1.10699168660981 | 1.88963956334389  | 1.49065285655439  |
| N  | -1.04226594539319 | -1.36168754838697 | -1.35203057897306 |

|   |                   |                   |                   |
|---|-------------------|-------------------|-------------------|
| N | 1.97592095572336  | 3.52215516620004  | 0.63947636878468  |
| N | -2.07529194023895 | 0.80846884886528  | -1.29256126859221 |
| N | 2.31773032522311  | 1.27180569890652  | 0.62230725048737  |
| N | 0.68231411046385  | -0.06201702711035 | -0.30153327980248 |
| C | 3.44115014943598  | 1.81265160989378  | 1.27056419612077  |
| C | -2.14673193379954 | -0.53008236138115 | -1.52454554975341 |
| C | 2.76807201031311  | -1.14668994103799 | 0.36404951411667  |
| H | 3.78594026293646  | -1.06610260802993 | 0.76810619531739  |
| C | -4.45030642256807 | 1.00114419761169  | -1.81813579986140 |
| H | -5.33341205886765 | 1.65513643307161  | -1.90865266252672 |
| C | -3.22225707919994 | 1.53655550719278  | -1.42280918416500 |
| H | -3.12370113587188 | 2.61070565957116  | -1.18656654568222 |
| C | 2.26490959466084  | -2.37432429884483 | -0.08685926247345 |
| H | 2.88279626963027  | -3.28579243827809 | -0.01180712263591 |
| C | 1.95854504359701  | 0.00014515032018  | 0.24355977066947  |
| C | -3.35832174960764 | -1.14892189569787 | -1.94830118662645 |
| H | -3.37829404151115 | -2.23726343521339 | -2.13967023057787 |
| C | 4.59044409738431  | 1.27048822416647  | 1.86954040915693  |
| H | 4.79119335157412  | 0.18741813319363  | 1.90658691078145  |
| C | 1.44563376228753  | 2.37645853385907  | 0.23963185070965  |
| C | 3.19218017371270  | 3.22875431474031  | 1.26406180725172  |
| C | 5.28049615558982  | 3.56444650862869  | 2.44305000924118  |
| H | 6.02265622542037  | 4.23838106260461  | 2.90791280529975  |
| C | 4.12231865412795  | 4.10697808144770  | 1.85270388965373  |
| H | 3.93073085656379  | 5.19411502262111  | 1.84389716318013  |

|   |                   |                   |                   |
|---|-------------------|-------------------|-------------------|
| C | 5.50917676689545  | 2.16956932391915  | 2.45423070455419  |
| H | 6.42282486790488  | 1.76871234285914  | 2.92840110208586  |
| C | 0.98432264777542  | -2.44110553539106 | -0.65102869835481 |
| H | 0.57425128153618  | -3.39637733212821 | -1.02253906380748 |
| C | -4.51337125306786 | -0.38009787349331 | -2.10287398342747 |
| H | -5.45593775524706 | -0.85304622508864 | -2.42953326036326 |
| C | 0.21852527762582  | -1.25349141904537 | -0.75487283753479 |
| H | -1.23459776108487 | -2.32333410007722 | -1.64772897781690 |
| O | 0.36127753959009  | 2.04472368611103  | -2.59307859737496 |
| C | -0.15738169197859 | 3.28791225609645  | -2.39346465368579 |
| C | 0.85433997908757  | 4.45855371231458  | -2.34711859329212 |
| C | -1.35533756705915 | 3.63631469825034  | -3.31723433905941 |
| C | 0.18078570879562  | 5.79142102639265  | -1.96298520890672 |
| H | 1.29589494329158  | 4.52586078946416  | -3.37199757084235 |
| H | 1.67680752771492  | 4.22410179010729  | -1.64028790935354 |
| C | -2.03212313703538 | 4.96869499879451  | -2.93586803128734 |
| H | -0.93178501965429 | 3.70510822160852  | -4.34899887945628 |
| H | -2.07931318056120 | 2.79325622783649  | -3.34212834143769 |
| C | -1.01444455153816 | 6.12889450410868  | -2.87917770075055 |
| H | 0.93259124492714  | 6.61398735211838  | -1.98514368068950 |
| H | -0.16088009421505 | 5.72423846331340  | -0.90062937880805 |
| H | -2.85444683045205 | 5.20015681573491  | -3.65306517006748 |
| H | -2.52119585537948 | 4.86302633175758  | -1.93373069314147 |
| H | -1.51593960726345 | 7.06544426195952  | -2.53920490688314 |
| H | -0.64143502363314 | 6.33506990516784  | -3.91315834774640 |



|   |                   |                   |                   |
|---|-------------------|-------------------|-------------------|
| C | 2.24315372945330  | -0.64807678285728 | -3.87256820490260 |
| C | 3.29761319430540  | 0.45006464802120  | -3.60888249409666 |
| H | 3.32093829537950  | 1.11960896653239  | -4.51667797425724 |
| H | 1.22549291123537  | -0.20534873822861 | -3.95898583768221 |
| H | 2.45813542873983  | -1.20091899617381 | -4.81721842477960 |
| H | 2.23114992023849  | -1.38577114839668 | -3.03722716549557 |
| C | 4.70538346608249  | -0.13785588489118 | -3.42531641496228 |
| H | 5.44188048333562  | 0.67185650927569  | -3.22598881537852 |
| H | 4.72320465284877  | -0.83467477282317 | -2.55519467691308 |
| H | 5.03437851958187  | -0.69862452879856 | -4.32939925148482 |
| O | 3.00079596730904  | 1.21053851207413  | -2.44296359516474 |
| H | 2.08938887402372  | 1.60865995895444  | -2.54804845058064 |
| H | -0.73734213615059 | 0.95491260316908  | 2.53876663446248  |
| H | -2.53979804422449 | 1.79479422323364  | 1.69829578088874  |
| H | -0.89083417289331 | 3.08746914923739  | 2.26559396065305  |

---

**E'-PH3**

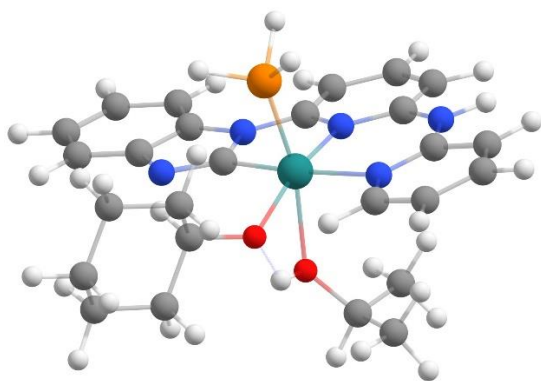

|    |                   |                  |                   |
|----|-------------------|------------------|-------------------|
| Ru | -0.01899406576275 | 1.29962617358325 | -1.09278878125461 |
| H  | 0.55016762209227  | 4.34267160169512 | -1.36906537015005 |
| P  | -1.14238662558451 | 2.04092608163996 | 0.67734671500033  |

|   |                   |                   |                   |
|---|-------------------|-------------------|-------------------|
| N | -1.21709443822291 | -1.74519991108442 | -0.74662251501201 |
| N | 2.24029370835233  | 3.21976555172479  | -0.14754711898395 |
| N | -1.77840090625081 | 0.31156711632468  | -1.86336383363603 |
| N | 2.37648102016798  | 1.03521515803180  | 0.48192133615964  |
| N | 0.64706073959005  | -0.36644295546900 | -0.11930891070067 |
| C | 3.50908105891246  | 1.65413742806383  | 1.03968841230691  |
| C | -2.08429812750142 | -0.96611022711294 | -1.51844272130261 |
| C | 2.48719809223018  | -1.34502465551467 | 1.16369541205765  |
| H | 3.46142328161630  | -1.23005226013322 | 1.65746263358703  |
| C | -3.89550763867600 | 0.49319808874382  | -3.04204163677226 |
| H | -4.58139447737668 | 1.11477714053498  | -3.64196831560943 |
| C | -2.67429209937313 | 1.01893221685348  | -2.61092583471716 |
| H | -2.32153427766549 | 2.04139851784392  | -2.85665994588168 |
| C | 1.83909350564991  | -2.59092743052654 | 1.13188735334273  |
| H | 2.30476553564032  | -3.46810827363958 | 1.61339844828013  |
| C | 1.86920831021650  | -0.24633988950244 | 0.53531731788835  |
| C | -3.30612124199701 | -1.57183847153042 | -1.92808095640071 |
| H | -3.52935010239508 | -2.61388594715086 | -1.63471571015051 |
| C | 4.58647305165208  | 1.22213065816806  | 1.83230495522467  |
| H | 4.70043752488168  | 0.18027366384698  | 2.17374733711181  |
| C | 1.62259993787573  | 2.05484844838438  | -0.25745676858763 |
| C | 3.39100857581005  | 3.02560071282824  | 0.61969159103331  |
| C | 5.45100356118917  | 3.52877943029587  | 1.79027289192919  |
| H | 6.22943338399495  | 4.25078663308063  | 2.09655253379580  |
| C | 4.37016100160293  | 3.96397764774140  | 0.99853536420728  |

|   |                   |                   |                   |
|---|-------------------|-------------------|-------------------|
| H | 4.27571914677851  | 5.01425403420786  | 0.67207851983052  |
| C | 5.55612112285376  | 2.18062733713916  | 2.20114584305193  |
| H | 6.41207355191559  | 1.86384867392126  | 2.82356152706152  |
| C | 0.60393473740283  | -2.71810257650071 | 0.48483269624391  |
| H | 0.07848716787822  | -3.68868205200759 | 0.44752304644981  |
| C | -4.21604279828170 | -0.83632789933099 | -2.69285244729118 |
| H | -5.16850040020174 | -1.29594097154118 | -3.01102968657512 |
| C | 0.03001713114415  | -1.57657065946865 | -0.13041185344565 |
| H | -1.57488526061673 | -2.69571768732759 | -0.61261921729287 |
| O | -0.42074897467249 | 2.83685555210010  | -2.45561887761758 |
| C | -0.19686537167683 | 4.21729641971189  | -2.19687562037478 |
| C | 0.39545689260927  | 4.90091430648806  | -3.45113875941703 |
| C | -1.50921916872519 | 4.92621540601109  | -1.78220139271662 |
| C | 0.61131217247764  | 6.41547613961522  | -3.23476439484379 |
| H | -0.29862759786336 | 4.73191675605136  | -4.31348934534915 |
| H | 1.36098365520172  | 4.40695613108594  | -3.71327325343735 |
| C | -1.29386571582751 | 6.43611407895281  | -1.53959123677757 |
| H | -2.26975138695613 | 4.77922584771445  | -2.59067250414915 |
| H | -1.92768530201002 | 4.44050428187914  | -0.86843072434470 |
| C | -0.68672405971235 | 7.11945543075884  | -2.78383367292317 |
| H | 1.00608410588614  | 6.88682644801009  | -4.16598850590939 |
| H | 1.39879400765631  | 6.56327123707815  | -2.45536214482199 |
| H | -2.25396944895146 | 6.92803748939609  | -1.25379305736304 |
| H | -0.60358908543603 | 6.57294081649791  | -0.67066916782884 |
| H | -0.49345851698914 | 8.19944226456329  | -2.58015311368325 |

|   |                   |                   |                   |
|---|-------------------|-------------------|-------------------|
| H | -1.43175668830333 | 7.08846888562604  | -3.61795992609250 |
| C | -0.04264830217112 | 0.02675673156647  | -4.87595921130465 |
| C | 1.25094716909989  | 0.06949297399568  | -4.04493856310470 |
| H | 2.08535132268440  | 0.39996364850233  | -4.71813958874219 |
| H | -0.33249014644500 | 1.04176694723922  | -5.22885652431996 |
| H | 0.10294055221992  | -0.61355754285380 | -5.77583427917061 |
| H | -0.89254741404284 | -0.39154861328676 | -4.29439391962723 |
| C | 1.62725995923061  | -1.29670497141822 | -3.45956758243235 |
| H | 2.53326021995427  | -1.21866451342405 | -2.81966106263295 |
| H | 0.79890235392272  | -1.71390835719970 | -2.84433469828787 |
| H | 1.84290350465938  | -2.02346042240518 | -4.27478400831372 |
| O | 1.20463147617599  | 1.03425327055040  | -2.96924501634303 |
| H | 0.71355242826388  | 1.91317616307314  | -3.20776118026927 |
| H | -1.00162254654571 | 1.36880954415507  | 1.95640118014500  |
| H | -2.59081205396762 | 2.07980237158004  | 0.66162969613752  |
| H | -0.91760834928802 | 3.38145483157207  | 1.16592814511760  |

---

### TS-III'-PH3

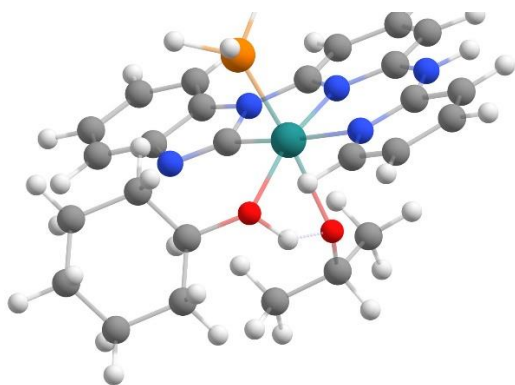

|    |                   |                   |                   |
|----|-------------------|-------------------|-------------------|
| Ru | -0.84707563421844 | -0.57994316738353 | 0.17031947296131  |
| H  | 0.51123362908443  | 2.17658155504324  | -0.99605050981527 |

|   |                   |                   |                   |
|---|-------------------|-------------------|-------------------|
| P | -1.83464213435482 | 0.16609703719687  | 2.04808662627700  |
| N | -2.17959658277888 | -3.57821113535992 | 0.41225021907215  |
| N | 1.59673965078387  | 1.15910288303374  | 0.99356053590136  |
| N | -2.72452350282230 | -1.43115659871534 | -0.52213762779519 |
| N | 1.56177345581131  | -1.01365388555241 | 1.67477616471804  |
| N | -0.25150734014574 | -2.30083756725297 | 1.06711591534930  |
| C | 2.74165821976120  | -0.47250920549934 | 2.21646306282998  |
| C | -3.04244704757705 | -2.72720103492110 | -0.28026962204744 |
| C | 1.54811042886182  | -3.40812172726583 | 2.30568713277639  |
| H | 2.53234950340743  | -3.35371438931011 | 2.78958392449836  |
| C | -4.85270559465863 | -1.13251089646115 | -1.65810337067928 |
| H | -5.53344486386626 | -0.45716451410830 | -2.20290407082929 |
| C | -3.61658467523801 | -0.66088594804171 | -1.20571328646679 |
| H | -3.27134933244007 | 0.37385362047427  | -1.38929052301337 |
| C | 0.84112273143526  | -4.61972219909391 | 2.24107731379054  |
| H | 1.26624658360551  | -5.53319424985787 | 2.69151217005633  |
| C | 0.98110878868339  | -2.26405404519902 | 1.71377438743721  |
| C | -4.28020978852879 | -3.28249256477248 | -0.71408790745698 |
| H | -4.51260725104786 | -4.34220744798316 | -0.50231058259619 |
| C | 3.77760064417869  | -0.96976476311809 | 3.02544844333126  |
| H | 3.80148410910305  | -2.00666388586424 | 3.39826755364665  |
| C | 0.88413654938584  | 0.04264679185587  | 0.91295657017828  |
| C | 2.73048500624867  | 0.89314546376132  | 1.76464588218221  |
| C | 4.82463085660104  | 1.25754604421689  | 2.92665112215017  |
| H | 5.65821512857602  | 1.92260507195705  | 3.21620249458257  |

|   |                   |                   |                   |
|---|-------------------|-------------------|-------------------|
| C | 3.78215671094785  | 1.75867309034834  | 2.12237343225318  |
| H | 3.77205854211627  | 2.80543568911317  | 1.77193140781392  |
| C | 4.82125150524383  | -0.08338689907082 | 3.37289173347458  |
| H | 5.64751142267799  | -0.45137452960818 | 4.00700136299415  |
| C | -0.40108386768995 | -4.66564639459924 | 1.59931074857312  |
| H | -0.97425724172867 | -5.60747270653128 | 1.53796938392403  |
| C | -5.19029928199525 | -2.47833640086568 | -1.40383295079885 |
| H | -6.15406111677044 | -2.89842842194515 | -1.74188426460757 |
| C | -0.92552758412505 | -3.48039260128470 | 1.02138021254851  |
| H | -2.55817602425711 | -4.52717073709721 | 0.48582323937758  |
| O | -1.24932922486278 | 1.04860776301655  | -1.18759412031794 |
| C | -0.58831736472747 | 2.32619559569989  | -1.14940766182679 |
| C | -0.81939102225148 | 3.05548734881738  | -2.49066293125214 |
| C | -1.09587222182609 | 3.17245740249110  | 0.02999437257145  |
| C | -0.16049451091256 | 4.45259834637151  | -2.49245399429733 |
| H | -1.92058846135892 | 3.15252622923021  | -2.66117975235922 |
| H | -0.42362601568162 | 2.43565964484221  | -3.33025350924589 |
| C | -0.44200309835471 | 4.57156335509249  | 0.03666003284747  |
| H | -2.20923593687820 | 3.26481144906306  | -0.03751471160185 |
| H | -0.85372132641129 | 2.64543229127095  | 0.97966686952005  |
| C | -0.64923996789194 | 5.30777149268056  | -1.30394639929235 |
| H | -0.36166847383385 | 4.97188563736395  | -3.45896268653571 |
| H | 0.94951447963717  | 4.33536352984883  | -2.42847632605341 |
| H | -0.84323252894224 | 5.17841337458984  | 0.88213876261543  |
| H | 0.65151075302875  | 4.45155815524407  | 0.23166239500041  |

|   |                   |                   |                   |
|---|-------------------|-------------------|-------------------|
| H | -0.12576739777473 | 6.29295521529156  | -1.29303872235001 |
| H | -1.73668319355013 | 5.53437172596854  | -1.43742801626813 |
| C | 1.67847386000631  | -2.48732754615121 | -1.80074019971825 |
| C | 1.03134994655251  | -1.25959355456151 | -2.46526518599500 |
| H | 0.81743842884350  | -1.53591354406994 | -3.53436279576155 |
| H | 0.95437138791868  | -3.32950691605332 | -1.73114267446100 |
| H | 2.55484857068398  | -2.83778979190381 | -2.39255641157287 |
| H | 2.04332563910953  | -2.24828840739643 | -0.77737476045468 |
| C | 1.98476889385542  | -0.04823390556036 | -2.48065212848269 |
| H | 1.53400792452810  | 0.81284594385863  | -3.02439760750379 |
| H | 2.23612629321909  | 0.28899277908258  | -1.45098425689747 |
| H | 2.93547894589892  | -0.30440265076044 | -3.00305486305392 |
| O | -0.24253585131544 | -0.96781201775349 | -1.87910749978371 |
| H | -0.67893458408212 | 0.22370297789706  | -1.86292156315472 |
| H | -2.18704741101649 | -0.75186747873566 | 3.12006159775929  |
| H | -3.12891749435524 | 0.80533274995180  | 1.95356934960374  |
| H | -1.20194363952487 | 1.15378347503541  | 2.89224960173064  |

---

**F'-PH3**

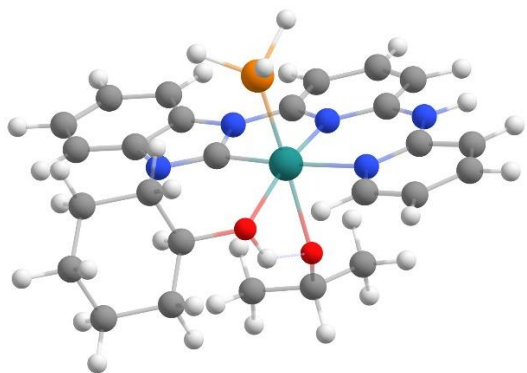

|    |                   |                  |                   |
|----|-------------------|------------------|-------------------|
| Ru | -0.39582314527483 | 1.21991397948292 | -1.18619856165204 |
|----|-------------------|------------------|-------------------|

|   |                   |                   |                   |
|---|-------------------|-------------------|-------------------|
| H | 0.91349744043856  | 4.05338952392999  | -2.15898674143169 |
| P | -1.41056155075141 | 1.92671993303609  | 0.71092112295566  |
| N | -1.66884242325277 | -1.79476947989151 | -0.92540945607149 |
| N | 1.98830270438754  | 3.02916784517265  | -0.35678493563858 |
| N | -2.25578968305338 | 0.33013511649884  | -1.88140006422376 |
| N | 2.03758582847875  | 0.84586900233868  | 0.28663301096655  |
| N | 0.24445333501051  | -0.47875029123518 | -0.30243335309043 |
| C | 3.21147750150864  | 1.41549938731230  | 0.81217926719528  |
| C | -2.54417851172528 | -0.97151628813010 | -1.63508253283073 |
| C | 2.08602955338606  | -1.55071001673055 | 0.90607072270719  |
| H | 3.07665450340118  | -1.47676759636477 | 1.37414145916718  |
| C | -4.37748251840089 | 0.56722798599069  | -3.04479689750344 |
| H | -5.06778530895272 | 1.22153043696950  | -3.60301836437222 |
| C | -3.15804999571101 | 1.07141344221763  | -2.58180866751306 |
| H | -2.84707046789305 | 2.11504746032539  | -2.76932015749930 |
| C | 1.40006593511715  | -2.77494519838897 | 0.85583450454103  |
| H | 1.85021651996241  | -3.68007413466517 | 1.29866593578599  |
| C | 1.48761818072862  | -0.41684774734997 | 0.32537562566851  |
| C | -3.76267870726681 | -1.56089629742404 | -2.07861332214891 |
| H | -3.96974327437084 | -2.62522410099304 | -1.86364686087970 |
| C | 4.28215368218377  | 0.93633484740994  | 1.58582964086160  |
| H | 4.34901387704760  | -0.10700372901283 | 1.93470425197805  |
| C | 1.31427903663054  | 1.88987854971170  | -0.44608531746757 |
| C | 3.14596667813691  | 2.78794419125263  | 0.38500479411581  |
| C | 5.25550100283394  | 3.19708946916564  | 1.50462690745360  |



|   |                   |                   |                   |
|---|-------------------|-------------------|-------------------|
| H | 6.07474881624255  | 3.88311426072473  | 1.78619915475321  |
| C | 4.17862924406484  | 3.67944150565137  | 0.73484467741249  |
| H | 4.12889108974694  | 4.73144671603512  | 0.40391226626671  |
| C | 5.30588906818852  | 1.84883848766937  | 1.92508568768057  |
| H | 6.15942856319183  | 1.49545490111628  | 2.53067699815178  |
| C | 0.14698585648982  | -2.84410376032621 | 0.23795781341081  |
| H | -0.40889571875605 | -3.79667951825007 | 0.18597662555397  |
| C | -4.68493032929928 | -0.78454605985604 | -2.78378301909327 |
| H | -5.63383494897047 | -1.23079689688142 | -3.13007322554149 |
| C | -0.40891483036968 | -1.67079324383270 | -0.33430011011915 |
| H | -2.02793620382033 | -2.75035313689064 | -0.84121598126290 |
| O | -0.81596733509785 | 2.91858842556118  | -2.52911575918752 |
| C | -0.15819353925043 | 4.21109791540783  | -2.43837265743043 |
| C | -0.24810125132864 | 4.93052235310048  | -3.79801397775459 |
| C | -0.80963343642120 | 5.03763516279971  | -1.32201247494109 |
| C | 0.38692460717850  | 6.33734454776351  | -3.72154660644838 |
| H | -1.32313552484889 | 5.01193143706077  | -4.09604613194305 |
| H | 0.25549842734218  | 4.31931894945968  | -4.58455439124668 |
| C | -0.17876831189412 | 6.44471589366480  | -1.23894229319968 |
| H | -1.90894271436734 | 5.11638337691118  | -1.51494739936111 |
| H | -0.67454045079988 | 4.50755498516170  | -0.35269301999588 |
| C | -0.24474348989140 | 7.18138548303271  | -2.59383667758887 |
| H | 0.28681764283170  | 6.85593979671286  | -4.70367311191253 |
| H | 1.48414226556048  | 6.23571152211127  | -3.53442001633790 |
| H | -0.68268260005340 | 7.04225061556224  | -0.44366633068723 |

|   |                   |                   |                   |
|---|-------------------|-------------------|-------------------|
| H | 0.88703806688689  | 6.33978081964935  | -0.92114531365542 |
| H | 0.26048398439256  | 8.17330093194652  | -2.52275062527927 |
| H | -1.31331063635405 | 7.39362351761896  | -2.84807454445286 |
| C | 1.59731519745126  | -1.18462305340817 | -3.41729478559725 |
| C | 1.41424199434070  | 0.31684845726405  | -3.73279905131177 |
| H | 1.28354873259468  | 0.39637897287937  | -4.84909743021482 |
| H | 0.67050784379802  | -1.75046897072040 | -3.66217425140898 |
| H | 2.43453474865648  | -1.62226369379980 | -4.00921703033743 |
| H | 1.83139456797433  | -1.34906487451009 | -2.34120485451491 |
| C | 2.68206359244846  | 1.12403847921395  | -3.37531926065764 |
| H | 2.52643241499427  | 2.21234576285020  | -3.54602220081949 |
| H | 2.97272777741865  | 0.98978856182842  | -2.31017099075854 |
| H | 3.54587951537943  | 0.80017347750008  | -4.00167063294292 |
| O | 0.21732858707719  | 0.82613170408800  | -3.17432191498482 |
| H | -0.29220421509013 | 2.27285342620449  | -3.18553116812658 |
| H | -1.69533578596616 | 0.99859652258536  | 1.79456776355189  |
| H | -2.74100957828328 | 2.49366206679995  | 0.64264324728970  |
| H | -0.82604189598694 | 2.95227788191152  | 1.54693099396990  |

---

### 5-dft-PH3

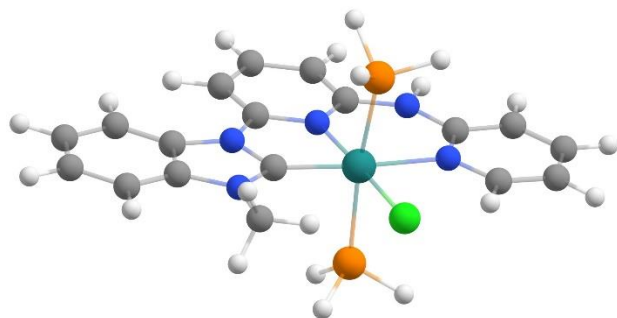

|    |                   |                  |                   |
|----|-------------------|------------------|-------------------|
| Ru | -0.53939673561849 | 1.99467407049988 | -0.49625298416563 |
|----|-------------------|------------------|-------------------|

|    |                   |                   |                   |
|----|-------------------|-------------------|-------------------|
| Cl | -1.60706762841330 | 4.17725401385837  | -0.17877573191421 |
| P  | -1.21835755318890 | 1.58165112358039  | 1.70026898274426  |
| P  | -0.08731637670866 | 2.76638300884416  | -2.65442385663272 |
| N  | 0.43046805535957  | 0.19313171922982  | -0.72931042550354 |
| N  | 2.22980808120179  | 1.42192509153092  | 0.04859069801153  |
| N  | -2.44507839184218 | 1.17446322987392  | -1.21585729438676 |
| N  | 2.00102870121322  | 3.55892048359849  | 0.57033058007355  |
| N  | -1.47945615258517 | -1.01563101234411 | -1.53186821010966 |
| C  | -0.13813117836757 | -0.96096757390416 | -1.17343608186373 |
| C  | -4.91409025937234 | 0.14601905033984  | -2.14563276127037 |
| C  | 0.60944907494922  | -2.16214519079638 | -1.28973258390784 |
| C  | 5.84136561963945  | 2.02930024242369  | 1.06948025254880  |
| C  | 4.40850904443383  | 4.00951961867757  | 1.27363595575615  |
| C  | 5.66572454113133  | 3.39005561783387  | 1.40289559548997  |
| C  | 3.34789756945166  | 3.21863256655645  | 0.80505107793544  |
| C  | 1.29046165182115  | 2.48663587979175  | 0.10447414770174  |
| C  | 4.77429794593356  | 1.23705956291763  | 0.59965271811070  |
| C  | -3.78573057966557 | -0.66970462261195 | -2.05956357728978 |
| C  | 1.76919210626451  | 0.17583291719982  | -0.38958232319247 |
| C  | 1.95928496479466  | -2.16449214302011 | -0.93682431061512 |
| C  | -3.56097149238787 | 1.95878228589987  | -1.30738472540920 |
| C  | -4.79839446367577 | 1.49618650746593  | -1.75926998266086 |
| C  | 2.55939481174060  | -0.97935632134055 | -0.47632789246904 |
| C  | -2.55742562096733 | -0.12748486696603 | -1.58851094595584 |
| C  | 3.51289147551645  | 1.84854014233646  | 0.47188094038017  |

|   |                   |                   |                   |
|---|-------------------|-------------------|-------------------|
| H | -0.76316921643673 | 0.42278860263183  | 2.43186922487128  |
| H | -1.20500758943063 | 2.95490677058200  | -3.53992999178798 |
| H | 0.52012546067500  | 4.06054840673132  | -2.78958341415332 |
| H | 0.77167782874030  | 2.03827851745392  | -3.55846880347501 |
| H | -0.93006693822251 | 2.57965420090089  | 2.69165294391732  |
| H | -2.62892996058548 | 1.43459937778711  | 1.94041367845032  |
| H | -1.74829016377512 | -1.95519904924888 | -1.84244618087838 |
| H | -5.87124281522128 | -0.26624603420155 | -2.50982727270019 |
| H | 0.11875625245881  | -3.08133809134386 | -1.65438259895495 |
| H | 6.83808447321702  | 1.56759950509669  | 1.17616065427435  |
| H | 4.26699636704599  | 5.07253041253114  | 1.52960815246895  |
| H | 6.52538819995298  | 3.97788629948262  | 1.76804819948126  |
| H | 4.96320882990058  | 0.18397870979164  | 0.34792073788330  |
| H | -3.83745249300659 | -1.73330130812081 | -2.35445040817502 |
| H | 2.55374002305484  | -3.09024787284354 | -1.01720483299403 |
| H | -3.41450051322404 | 3.00811886636402  | -0.99100447728430 |
| H | -5.65474180779948 | 2.18929626682121  | -1.80510949787410 |
| H | 3.61727114687869  | -0.96818571168371 | -0.18971141479862 |
| C | 1.49810523656496  | 4.91320635796881  | 0.81579892467813  |
| H | 0.41875775729478  | 4.95317222157529  | 0.56523901826149  |
| H | 2.05527927543372  | 5.64135293956737  | 0.18541254809947  |
| H | 1.64519343582636  | 5.18031521068093  | 1.88581754928451  |

---

**5a-dft-PH3**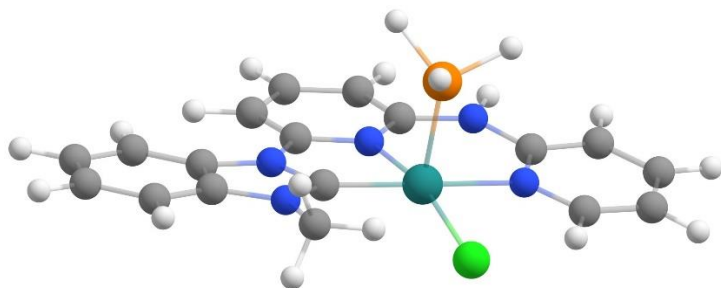

|    |                   |                   |                   |
|----|-------------------|-------------------|-------------------|
| Ru | -0.56223753335435 | 1.97921376423829  | -0.44706606182644 |
| Cl | -1.38236514056928 | 4.18426305295600  | -0.65294169410527 |
| P  | -1.15415708977950 | 1.62956560555941  | 1.63561250028849  |
| N  | 0.40511951129352  | 0.18235273441428  | -0.68471279756815 |
| N  | 2.22275005420462  | 1.43879292956853  | 0.01032494444212  |
| N  | -2.42635141149060 | 1.18453332102793  | -1.24894213466990 |
| N  | 1.95321365807970  | 3.52974261441235  | 0.68202470781143  |
| N  | -1.53590216742397 | -1.05925884622318 | -1.33331966465613 |
| C  | -0.17019516136198 | -0.98238836025983 | -1.09495456151901 |
| C  | -4.91951697353385 | 0.15148372603260  | -2.10989179347911 |
| C  | 0.59185488908549  | -2.16683057122882 | -1.27314940916094 |
| C  | 5.83699407983744  | 2.06698376995018  | 1.00157893988415  |
| C  | 4.36286703054009  | 3.99305582389652  | 1.36920537430639  |
| C  | 5.63586445594760  | 3.39736249189442  | 1.43198203016556  |
| C  | 3.31133903181024  | 3.20884663439524  | 0.86863563640606  |
| C  | 1.26487976528394  | 2.47755525295662  | 0.14397523592182  |
| C  | 4.78066801107772  | 1.28228690479882  | 0.49744444163513  |
| C  | -3.82340899931828 | -0.69037420174152 | -1.92497820986284 |
| C  | 1.76544409869288  | 0.19070685050715  | -0.43049046271927 |

|   |                   |                   |                   |
|---|-------------------|-------------------|-------------------|
| C | 1.96293590116845  | -2.13953217593649 | -1.01863335052639 |
| C | -3.51413282216993 | 1.99432482288920  | -1.44110280474356 |
| C | -4.75905104867632 | 1.53092806116720  | -1.86508125596780 |
| C | 2.57050971490469  | -0.94393991538584 | -0.59108653950627 |
| C | -2.58156317990499 | -0.14546703168165 | -1.49476758662246 |
| C | 3.50235099306038  | 1.86848330064663  | 0.43867972944478  |
| H | -0.40141915095304 | 0.69584751073808  | 2.43807283221312  |
| H | -1.15661411452150 | 2.75445907745536  | 2.53582862867583  |
| H | -2.48476635360407 | 1.12751965951091  | 1.87180216491270  |
| H | -1.82772230779775 | -2.01437909881779 | -1.56745536086543 |
| H | -5.88703856423887 | -0.26173675650471 | -2.44442993559860 |
| H | 0.09765558244661  | -3.09290933844498 | -1.61458299558459 |
| H | 6.84697132913852  | 1.62542103240771  | 1.05586659268304  |
| H | 4.20246722101403  | 5.03343844245700  | 1.69688237344369  |
| H | 6.48939977024726  | 3.98022507668314  | 1.81873861274000  |
| H | 4.99005044452459  | 0.25557580184333  | 0.16528245838925  |
| H | -3.90992713348954 | -1.77549069659724 | -2.11393056954302 |
| H | 2.57189937130613  | -3.04902447169602 | -1.15610596360927 |
| H | -3.33364462260675 | 3.06530784388721  | -1.23777274223123 |
| H | -5.58918975299526 | 2.24426609230933  | -1.99840747308429 |
| H | 3.64800657182100  | -0.91073021968230 | -0.39158988641312 |
| C | 1.41286536866165  | 4.84216895836120  | 1.04795017770199  |
| H | 0.33081348326051  | 4.87144826500521  | 0.81478122111399  |
| H | 1.92137600669829  | 5.63658533672611  | 0.45849073565723  |
| H | 1.58679718368443  | 5.02904692550435  | 2.13094391602632  |

---

**A(Me)-PH3**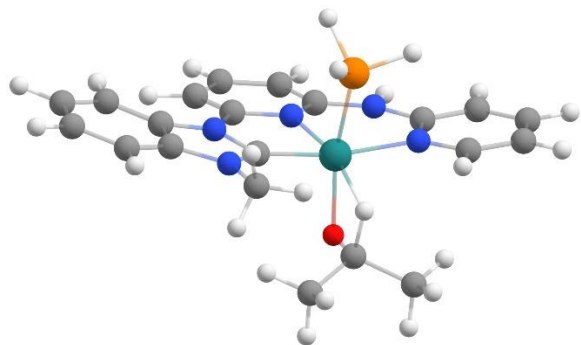

|    |                   |                   |                   |
|----|-------------------|-------------------|-------------------|
| Ru | -0.03516080407981 | 1.49634252933634  | -0.99124699648668 |
| P  | -0.91427103715389 | 1.87749810295521  | 1.09001816842247  |
| N  | -1.77556359435378 | -1.18995463048474 | -1.80562341360608 |
| N  | 2.60213426565993  | 2.39614921190910  | 0.43827251277933  |
| N  | -2.07200977573082 | 1.19611228907274  | -1.67795540218908 |
| N  | 2.27593399399246  | 0.22814926723733  | 0.12664234851308  |
| N  | 0.28928560257038  | -0.52315671800788 | -0.77952663136492 |
| C  | 3.46973477594937  | 0.33186004716443  | 0.88015368931377  |
| C  | -2.55895686370959 | -0.04321454384501 | -1.94240499633801 |
| C  | 1.99953241459051  | -2.20010600090289 | -0.31014028857262 |
| H  | 3.01376603872485  | -2.44781921947412 | 0.02906759408526  |
| C  | -4.25558619737683 | 2.14779481534329  | -2.18777466060610 |
| H  | -4.88674934224741 | 3.04855260881771  | -2.26196733432226 |
| C  | -2.92371463497766 | 2.25789773044315  | -1.78761557631514 |
| H  | -2.48823934458207 | 3.24049432029573  | -1.53509861311941 |
| C  | 1.14349583079275  | -3.19831494232142 | -0.80936502670605 |
| H  | 1.47545556789520  | -4.25018500972830 | -0.83055872789544 |
| C  | 1.53720645775219  | -0.87705160014767 | -0.30778238575301 |

|   |                   |                   |                   |
|---|-------------------|-------------------|-------------------|
| C | -3.90445083151602 | -0.23609406197217 | -2.36863501323265 |
| H | -4.27114802599462 | -1.25560121703321 | -2.58451726043533 |
| C | 4.36586893086258  | -0.59650548894898 | 1.43800086673068  |
| H | 4.22995674698336  | -1.68440269777105 | 1.34845424569143  |
| C | 1.73004519285471  | 1.50670662142842  | -0.14307573752015 |
| C | 3.67259925214995  | 1.72793327636753  | 1.06190435566323  |
| C | 5.67524075042668  | 1.29809919699816  | 2.31475661830233  |
| H | 6.55350546033323  | 1.65761553590071  | 2.87811443750209  |
| C | 4.77198026638991  | 2.23349582143799  | 1.77251034884405  |
| H | 4.92579433971948  | 3.31742969663150  | 1.90565417701123  |
| C | 5.47034018502693  | -0.08944167944306 | 2.15387454999327  |
| H | 6.18807567782377  | -0.80023844997783 | 2.59832478965140  |
| C | -0.11849410259135 | -2.85239793444014 | -1.29768262965651 |
| H | -0.79618646404647 | -3.62260171765941 | -1.70513024670959 |
| C | -4.75302054101724 | 0.86302886646210  | -2.49647367516289 |
| H | -5.79736350763419 | 0.72173103604336  | -2.82484222210960 |
| C | -0.51996800851310 | -1.49120719954156 | -1.28518092628878 |
| H | -2.26605716345629 | -2.03134776957790 | -2.12625913849163 |
| C | -0.54114678478443 | 3.49553990545188  | -3.81971303903113 |
| C | 0.49542266790769  | 2.80779606977958  | -2.90291738330931 |
| H | 0.02024237389271  | 3.15261603988178  | -1.68173976067976 |
| H | -1.51232604512032 | 2.96183775635873  | -3.82124398031513 |
| H | -0.70208820944594 | 4.56364987381002  | -3.55294946192344 |
| H | -0.14461542435260 | 3.46194863965034  | -4.85995836872777 |
| C | 1.86424330044506  | 3.52260593820945  | -2.93705664141839 |



|   |                   |                  |                   |
|---|-------------------|------------------|-------------------|
| H | 2.61250797551277  | 2.99476706298566 | -2.31204937972545 |
| H | 2.23088301275038  | 3.50115095332434 | -3.98844102935645 |
| H | 1.79782078469638  | 4.58891496546675 | -2.62731222451909 |
| O | 0.54073729450175  | 1.46724349858435 | -2.98584441104503 |
| H | -2.30798716615755 | 2.23913393670407 | 1.20200729425443  |
| H | -0.38970617139218 | 2.91066353102622 | 1.95015529410308  |
| H | -0.91950447011722 | 0.83050274634130 | 2.08921259533506  |
| C | 2.42348371700324  | 3.84472030328360 | 0.47972774564949  |
| H | 1.46250836128465  | 4.09745294098790 | -0.01105499895520 |
| H | 3.25255406407850  | 4.36289243308721 | -0.05091943759058 |
| H | 2.39795920778002  | 4.19933331249933 | 1.53448538763302  |

---

### TS-I(Me)-PH3

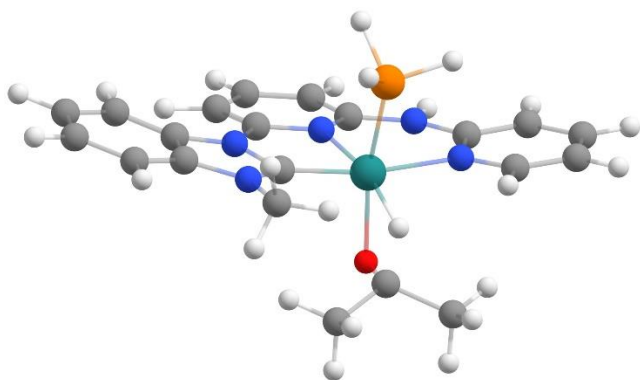

|    |                   |                   |                   |
|----|-------------------|-------------------|-------------------|
| Ru | -0.03482960680010 | 1.51075134163728  | -0.99543457701204 |
| P  | -0.91550787736574 | 1.90382111220552  | 1.07423337701494  |
| N  | -1.77378595347890 | -1.18994036278717 | -1.80343680825572 |
| N  | 2.60100179343435  | 2.39984837839161  | 0.44380545762179  |
| N  | -2.07198827637740 | 1.19978220545640  | -1.68213390793481 |
| N  | 2.27541145460860  | 0.23290815629748  | 0.12259610036132  |
| N  | 0.29027021837043  | -0.52558391185718 | -0.78099944531973 |

|   |                   |                   |                   |
|---|-------------------|-------------------|-------------------|
| C | 3.46803106376232  | 0.33407870830693  | 0.87834734918502  |
| C | -2.55793813488869 | -0.04272110891997 | -1.93761172782058 |
| C | 2.00550535253212  | -2.19639376509975 | -0.31813770281059 |
| H | 3.02140870284400  | -2.44312305641865 | 0.01656925180159  |
| C | -4.26237352281931 | 2.14256710189900  | -2.18387980426534 |
| H | -4.89617675137397 | 3.04144840387457  | -2.25874248526680 |
| C | -2.92847468757156 | 2.25839367241884  | -1.79250710315062 |
| H | -2.49318211798498 | 3.24269450951043  | -1.54803691645456 |
| C | 1.14952026246520  | -3.19622625215200 | -0.81504507169062 |
| H | 1.48421936303805  | -4.24727669008582 | -0.83723986155997 |
| C | 1.53855725743322  | -0.87453247235182 | -0.31288416384964 |
| C | -3.90593346467747 | -0.24052224521533 | -2.35432566362139 |
| H | -4.27129499105976 | -1.26216507852147 | -2.56235029388461 |
| C | 4.36397616630571  | -0.59618449825248 | 1.43367959307834  |
| H | 4.22883733436411  | -1.68378906827514 | 1.34031584643574  |
| C | 1.72959286476551  | 1.51342341309018  | -0.14348441456453 |
| C | 3.67080027820770  | 1.72916093328069  | 1.06633197590859  |
| C | 5.67220584487090  | 1.29518144664738  | 2.31938336699591  |
| H | 6.54989394590129  | 1.65254596191096  | 2.88500339582914  |
| C | 4.76912750869879  | 2.23242452046514  | 1.77998084509783  |
| H | 4.92257643536539  | 3.31581622251490  | 1.91774166701632  |
| C | 5.46751018105032  | -0.09166636774215 | 2.15278956985222  |
| H | 6.18472376521425  | -0.80422660502805 | 2.59528701142112  |
| C | -0.11508095796549 | -2.85439133143547 | -1.29963881960785 |
| H | -0.79202907833357 | -3.62660644634030 | -1.70451487881873 |

|   |                   |                   |                   |
|---|-------------------|-------------------|-------------------|
| C | -4.75863726905560 | 0.85514003816104  | -2.48267730261118 |
| H | -5.80466484379907 | 0.70911269485736  | -2.80354677520269 |
| C | -0.51741650491896 | -1.49318193430275 | -1.28536815139288 |
| H | -2.26698785565511 | -2.03079815497004 | -2.12131372485711 |
| C | -0.53101003432257 | 3.49926272358211  | -3.78848381085299 |
| C | 0.51613112696553  | 2.77942064490885  | -2.91596316929353 |
| H | -0.02086836337309 | 3.15240461702333  | -1.56718956582761 |
| H | -1.49537613522988 | 2.95462895744115  | -3.81345964359693 |
| H | -0.69994512949846 | 4.55242807689995  | -3.47354701447266 |
| H | -0.13634300367405 | 3.51848448231124  | -4.83054885703363 |
| C | 1.87500880647618  | 3.50460043020448  | -2.90148117667708 |
| H | 2.62290640309261  | 2.95891460555730  | -2.29245489127748 |
| H | 2.24971977972679  | 3.52727194623456  | -3.95081684271478 |
| H | 1.79580030855378  | 4.55778052441212  | -2.55427419101777 |
| O | 0.55029507742214  | 1.45655906210022  | -3.00554751845923 |
| H | -2.30460699784385 | 2.28462491682578  | 1.17534641882715  |
| H | -0.37931252730945 | 2.93320076210274  | 1.93056461055026  |
| H | -0.94021629340901 | 0.85999991321596  | 2.07655172211492  |
| C | 2.42457403230979  | 3.84850259847222  | 0.49279843531602  |
| H | 1.46787810450957  | 4.10606055514475  | -0.00360207451709 |
| H | 3.25919179859453  | 4.36758777711001  | -0.02847383667765 |
| H | 2.39310514790282  | 4.19643793528297  | 1.54968619794223  |

---

**B(Me)-PH3**

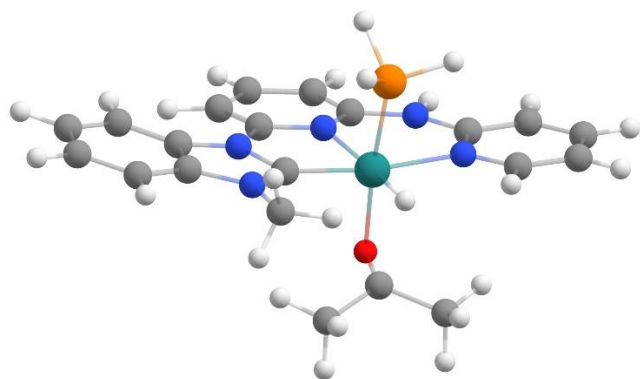

|    |                   |                   |                   |
|----|-------------------|-------------------|-------------------|
| Ru | -0.16031861506586 | 1.59470240405466  | -0.79142052608258 |
| P  | -1.02715439096933 | 1.83001120879064  | 1.27921647087411  |
| N  | -1.79777975958429 | -1.13410550377869 | -1.78222973358305 |
| N  | 2.50545661130969  | 2.45499781660697  | 0.60140810205875  |
| N  | -2.16144814667005 | 1.25101331244576  | -1.54132978504840 |
| N  | 2.22008312709437  | 0.29843539449934  | 0.17864339238470  |
| N  | 0.25510469578415  | -0.49067434258277 | -0.74633173851674 |
| C  | 3.44546515129876  | 0.39528050103158  | 0.88113816744641  |
| C  | -2.59411655762666 | 0.00977284831188  | -1.89407928080665 |
| C  | 2.01626805756351  | -2.12095977759853 | -0.37576622994638 |
| H  | 3.03956444163504  | -2.36217271818224 | -0.06108552596668 |
| C  | -4.34543365035453 | 2.16357470626599  | -2.12561369712369 |
| H  | -4.99860851313772 | 3.04909557413045  | -2.19343746127149 |
| C  | -3.04063104954084 | 2.29311353533691  | -1.65107507630141 |
| H  | -2.63737722579603 | 3.27230996033085  | -1.34226875496666 |
| C  | 1.17717631989530  | -3.11949079735696 | -0.90738228566329 |
| H  | 1.54001496487226  | -4.15936124778029 | -0.97655774230116 |
| C  | 1.51213434139930  | -0.81330514538283 | -0.30706487025174 |
| C  | -3.91140083510553 | -0.19614745561249 | -2.39877662836015 |

|   |                   |                   |                   |
|---|-------------------|-------------------|-------------------|
| H | -4.23431618639873 | -1.21300594998273 | -2.68601917730040 |
| C | 4.39506020862703  | -0.53441326313883 | 1.34151423936950  |
| H | 4.28792248861577  | -1.61927904096331 | 1.19660284454637  |
| C | 1.62814901360131  | 1.57906060115173  | 0.01118877887521  |
| C | 3.62063459023831  | 1.78397092554588  | 1.13587449086414  |
| C | 5.69355894937861  | 1.34596951307549  | 2.26509842148221  |
| H | 6.58774485072290  | 1.69895769743724  | 2.80713210852095  |
| C | 4.73908139700962  | 2.28204839018931  | 1.82149726932023  |
| H | 4.86767445641703  | 3.36087233545138  | 2.01089174828470  |
| C | 5.51854934356144  | -0.03557779726546 | 2.03287378334374  |
| H | 6.27569017486675  | -0.74902093243512 | 2.40130855493587  |
| C | -0.10277622787016 | -2.79672128926476 | -1.36411100610820 |
| H | -0.76176025431487 | -3.57106050314364 | -1.79389764824518 |
| C | -4.78729988559968 | 0.88132175573100  | -2.51795551520192 |
| H | -5.80814485023741 | 0.72533759964760  | -2.90794401334099 |
| C | -0.53322248983705 | -1.44462284194643 | -1.28626983493184 |
| H | -2.27781492112729 | -1.96495399119380 | -2.14365067960722 |
| C | -0.45695998037981 | 3.39563693462828  | -3.65249994765288 |
| C | 0.59100888537400  | 2.55265142423493  | -2.93247566016153 |
| H | -0.38212468975775 | 3.22618825817061  | -0.72924329748586 |
| H | -1.44289154829240 | 2.89228139938150  | -3.68478774619025 |
| H | -0.55897041380573 | 4.41081464592936  | -3.21320497023808 |
| H | -0.11401864205730 | 3.53064130043639  | -4.70742831823391 |
| C | 1.97428995044123  | 3.18655326935499  | -2.82468332818150 |
| H | 2.68589768346626  | 2.53879016899481  | -2.27508493306835 |

|   |                   |                  |                   |
|---|-------------------|------------------|-------------------|
| H | 2.36551610888600  | 3.31417985390432 | -3.86367660235874 |
| H | 1.94245375836338  | 4.19960820201944 | -2.37055242628557 |
| O | 0.46236724731891  | 1.27936940648601 | -2.86868226630037 |
| H | -2.40513327940721 | 2.23777794738623 | 1.39898789743272  |
| H | -0.45213389505310 | 2.77695361160578 | 2.19688742313291  |
| H | -1.07256552684505 | 0.70101183270803 | 2.17983389386655  |
| C | 2.31585286454596  | 3.90088196291923 | 0.68393097313175  |
| H | 1.34961164991398  | 4.15149233253159 | 0.20101999467848  |
| H | 3.14142431088144  | 4.43417929360935 | 0.16218088314409  |
| H | 2.29701589175202  | 4.22986467327332 | 1.74713726938948  |

---

### 6-dft-PH3

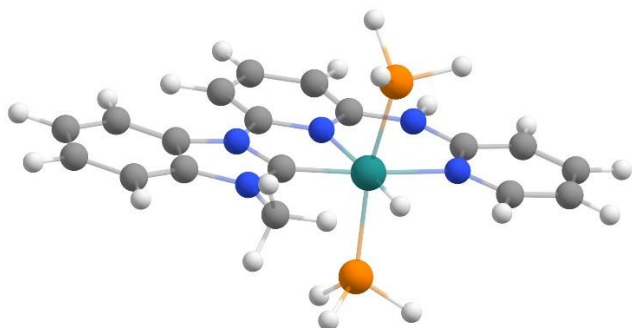

|    |                   |                   |                   |
|----|-------------------|-------------------|-------------------|
| Ru | -0.50247378147718 | 1.98790182955286  | -0.50162806604013 |
| H  | -1.16818817387398 | 3.48000960987609  | -0.27245562212278 |
| P  | -1.20621752405084 | 1.69950853954117  | 1.68405304930574  |
| P  | -0.11219747756954 | 2.84425690264063  | -2.61623506227638 |
| N  | 0.48642682985172  | 0.12701612851368  | -0.74004560137240 |
| N  | 2.26887268739825  | 1.37203121175229  | 0.04173365996365  |
| N  | -2.37763812282683 | 1.18526797966527  | -1.19570379716079 |
| N  | 2.02037102879405  | 3.51805369235944  | 0.53892102314701  |
| N  | -1.44677436964357 | -1.02728497632413 | -1.53924832695102 |

|   |                   |                   |                   |
|---|-------------------|-------------------|-------------------|
| C | -0.09584258640476 | -1.00967287434751 | -1.18587798084183 |
| C | -4.86979536571101 | 0.21075552576892  | -2.10514573578957 |
| C | 0.63896093831526  | -2.21722431965569 | -1.30993785167542 |
| C | 5.86046826949774  | 2.01437934954943  | 1.10821720968079  |
| C | 4.41845249287165  | 3.99311845753328  | 1.26581367197527  |
| C | 5.67629667473154  | 3.37880157167823  | 1.41999376146004  |
| C | 3.36593386263190  | 3.19460289501768  | 0.79321267741858  |
| C | 1.32296629681884  | 2.43294218822807  | 0.07977526985413  |
| C | 4.80160189859355  | 1.21297278914791  | 0.63352705536405  |
| C | -3.75584510225714 | -0.62666076314196 | -2.03795902512555 |
| C | 1.81651620349912  | 0.11732527888719  | -0.39967438904572 |
| C | 1.99280478772417  | -2.21888951176768 | -0.95928413005784 |
| C | -3.48041375164232 | 1.99137825099547  | -1.26817105388220 |
| C | -4.73148266055484 | 1.55750578474778  | -1.70977372099680 |
| C | 2.60583973015862  | -1.04052312858308 | -0.49463222172533 |
| C | -2.50942672925530 | -0.11580013071104 | -1.57604552442958 |
| C | 3.54137433548425  | 1.81791802518383  | 0.47750972736703  |
| H | -0.79861177783475 | 0.57583274570900  | 2.50004070745612  |
| H | -1.24989188353878 | 3.08022730674969  | -3.46903714477247 |
| H | 0.49447127102805  | 4.14271701905206  | -2.73895782303440 |
| H | 0.71501553290193  | 2.17901464292906  | -3.60036655137575 |
| H | -0.91571127787498 | 2.72317433934687  | 2.65189796291692  |
| H | -2.62283262197372 | 1.59712525476394  | 1.92934335934369  |
| H | -1.74029396780136 | -1.95676804666879 | -1.85792076478504 |
| H | -5.83746468142449 | -0.18213700429231 | -2.46257421379269 |

|   |                   |                   |                   |
|---|-------------------|-------------------|-------------------|
| H | 0.14892815608855  | -3.13640260728692 | -1.67565950225382 |
| H | 6.85652481552557  | 1.55685099289283  | 1.23684844723993  |
| H | 4.26991377035251  | 5.05889287387250  | 1.50739210550692  |
| H | 6.52911194746493  | 3.97397752515049  | 1.78936628401700  |
| H | 4.99147557681478  | 0.15510460319753  | 0.40182809348111  |
| H | -3.83419562651477 | -1.68617185437989 | -2.34152257597948 |
| H | 2.58371478753790  | -3.14660388029512 | -1.04640119950598 |
| H | -3.31014367397580 | 3.03269364951043  | -0.94677239309436 |
| H | -5.57828558725066 | 2.26268210147496  | -1.74242241268641 |
| H | 3.66716158109821  | -1.03978566728673 | -0.21740387424539 |
| C | 1.44740442310498  | 4.84720632518897  | 0.74176533812537  |
| H | 0.37501172284148  | 4.80209685029855  | 0.46084474576546  |
| H | 1.96950509635052  | 5.59719683662531  | 0.10629190412059  |
| H | 1.54230202597655  | 5.15323568733942  | 1.80769051150972  |

---

### 6a-dft-PH3

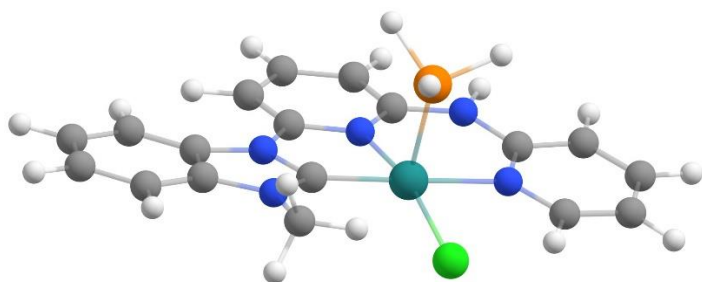

|    |                   |                  |                   |
|----|-------------------|------------------|-------------------|
| Ru | -0.56223753335435 | 1.97921376423829 | -0.44706606182644 |
| Cl | -1.38236514056928 | 4.18426305295600 | -0.65294169410527 |
| P  | -1.15415708977950 | 1.62956560555941 | 1.63561250028849  |
| N  | 0.40511951129352  | 0.18235273441428 | -0.68471279756815 |
| N  | 2.22275005420462  | 1.43879292956853 | 0.01032494444212  |



|   |                   |                   |                   |
|---|-------------------|-------------------|-------------------|
| N | -2.42635141149060 | 1.18453332102793  | -1.24894213466990 |
| N | 1.95321365807970  | 3.52974261441235  | 0.68202470781143  |
| N | -1.53590216742397 | -1.05925884622318 | -1.33331966465613 |
| C | -0.17019516136198 | -0.98238836025983 | -1.09495456151901 |
| C | -4.91951697353385 | 0.15148372603260  | -2.10989179347911 |
| C | 0.59185488908549  | -2.16683057122882 | -1.27314940916094 |
| C | 5.83699407983744  | 2.06698376995018  | 1.00157893988415  |
| C | 4.36286703054009  | 3.99305582389652  | 1.36920537430639  |
| C | 5.63586445594760  | 3.39736249189442  | 1.43198203016556  |
| C | 3.31133903181024  | 3.20884663439524  | 0.86863563640606  |
| C | 1.26487976528394  | 2.47755525295662  | 0.14397523592182  |
| C | 4.78066801107772  | 1.28228690479882  | 0.49744444163513  |
| C | -3.82340899931828 | -0.69037420174152 | -1.92497820986284 |
| C | 1.76544409869288  | 0.19070685050715  | -0.43049046271927 |
| C | 1.96293590116845  | -2.13953217593649 | -1.01863335052639 |
| C | -3.51413282216993 | 1.99432482288920  | -1.44110280474356 |
| C | -4.75905104867632 | 1.53092806116720  | -1.86508125596780 |
| C | 2.57050971490469  | -0.94393991538584 | -0.59108653950627 |
| C | -2.58156317990499 | -0.14546703168165 | -1.49476758662246 |
| C | 3.50235099306038  | 1.86848330064663  | 0.43867972944478  |
| H | -0.40141915095304 | 0.69584751073808  | 2.43807283221312  |
| H | -1.15661411452150 | 2.75445907745536  | 2.53582862867583  |
| H | -2.48476635360407 | 1.12751965951091  | 1.87180216491270  |
| H | -1.82772230779775 | -2.01437909881779 | -1.56745536086543 |
| H | -5.88703856423887 | -0.26173675650471 | -2.44442993559860 |

|   |                   |                   |                   |
|---|-------------------|-------------------|-------------------|
| H | 0.09765558244661  | -3.09290933844498 | -1.61458299558459 |
| H | 6.84697132913852  | 1.62542103240771  | 1.05586659268304  |
| H | 4.20246722101403  | 5.03343844245700  | 1.69688237344369  |
| H | 6.48939977024726  | 3.98022507668314  | 1.81873861274000  |
| H | 4.99005044452459  | 0.25557580184333  | 0.16528245838925  |
| H | -3.90992713348954 | -1.77549069659724 | -2.11393056954302 |
| H | 2.57189937130613  | -3.04902447169602 | -1.15610596360927 |
| H | -3.33364462260675 | 3.06530784388721  | -1.23777274223123 |
| H | -5.58918975299526 | 2.24426609230933  | -1.99840747308429 |
| H | 3.64800657182100  | -0.91073021968230 | -0.39158988641312 |
| C | 1.41286536866165  | 4.84216895836120  | 1.04795017770199  |
| H | 0.33081348326051  | 4.87144826500521  | 0.81478122111399  |
| H | 1.92137600669829  | 5.63658533672611  | 0.45849073565723  |
| H | 1.58679718368443  | 5.02904692550435  | 2.13094391602632  |

---

**NPS-C(Me)-PH3**

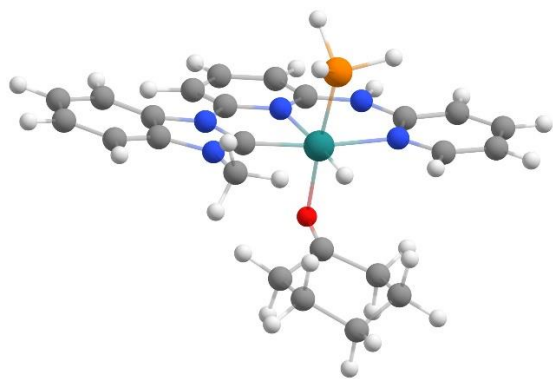

|    |                   |                  |                   |
|----|-------------------|------------------|-------------------|
| Ru | 0.12300074328788  | 3.17308053395906 | -0.77320776331966 |
| P  | -0.43187129305977 | 5.00161254681378 | 0.40235275608072  |
| N  | -2.06279991706372 | 1.01929479177039 | 0.52692811917487  |
| N  | 3.05612299944493  | 4.19984483954987 | -0.35579447741608 |

|   |                   |                   |                   |
|---|-------------------|-------------------|-------------------|
| N | -1.97620777702426 | 2.80338820926292  | -1.11126886949286 |
| N | 2.38394067574279  | 2.48507164065685  | 0.87363916191241  |
| N | 0.20119334281951  | 1.73333128692610  | 0.78853819935684  |
| C | 3.69668204011259  | 2.78191509894629  | 1.31168073837631  |
| C | -2.66008243063122 | 1.84153320032185  | -0.43213856845422 |
| C | 1.72071302284788  | 0.50611422654749  | 2.23190408436000  |
| H | 2.73037328166578  | 0.33709354226419  | 2.62719651824497  |
| C | -4.03147870517261 | 3.42320417667617  | -2.26963246707330 |
| H | -4.52555074659656 | 4.07991856351609  | -3.00444277765781 |
| C | -2.67174742157100 | 3.57595501814625  | -2.00133140363315 |
| H | -2.06904629763768 | 4.34406470653758  | -2.51437908507090 |
| C | 0.66251492550927  | -0.35287437016938 | 2.58600509457487  |
| H | 0.84253905641263  | -1.18087229932113 | 3.29292271308944  |
| C | 1.44481089416091  | 1.54682560190766  | 1.33189832312625  |
| C | -4.04998653782437 | 1.62230234776472  | -0.66172791250780 |
| H | -4.57805494927394 | 0.82974052896645  | -0.10153407651190 |
| C | 4.54960861454518  | 2.26183596380040  | 2.30192727101887  |
| H | 4.26032398479321  | 1.43567543009950  | 2.96749217564997  |
| C | 1.97922246597353  | 3.36824635163420  | -0.16351827776273 |
| C | 4.11812598788808  | 3.87726745011807  | 0.50818083696930  |
| C | 6.23954635292831  | 3.92610574957659  | 1.63139029889847  |
| H | 7.24559575854666  | 4.35799767682158  | 1.77035498058186  |
| C | 5.38595118315913  | 4.46245173191194  | 0.64789269905995  |
| H | 5.70419887053041  | 5.30977157493343  | 0.01773675995366  |
| C | 5.82356269218731  | 2.84966449259944  | 2.44465017822316  |

|   |                   |                   |                   |
|---|-------------------|-------------------|-------------------|
| H | 6.50768792896557  | 2.45453489420950  | 3.21530432445944  |
| C | -0.60644053762705 | -0.17380255691987 | 2.03066337361074  |
| H | -1.43816259424698 | -0.85171666803548 | 2.29022911079097  |
| C | -4.73680646642922 | 2.41118688712928  | -1.58281410383586 |
| H | -5.81314549019269 | 2.24439802963003  | -1.76226205809166 |
| C | -0.80014302935477 | 0.88334234433045  | 1.10144115758954  |
| H | -2.72362227262108 | 0.32738728914560  | 0.89568518689944  |
| H | 0.18118208294169  | 4.30620585900413  | -1.97451736707295 |
| O | 0.48518907234557  | 1.29990033668742  | -1.91677655733001 |
| H | -1.72521474668619 | 5.59565479224821  | 0.16463279250749  |
| H | 0.36079726488616  | 6.19967340453926  | 0.30337523835424  |
| H | -0.49904089599078 | 4.94939301134278  | 1.84572881118439  |
| C | 3.10101504914479  | 5.30880002476858  | -1.30401699349707 |
| C | 0.67078278312706  | 1.96208046811538  | -2.98744062075293 |
| C | 2.07542502878316  | 2.32792292490048  | -3.46106922348271 |
| C | -0.40960269650740 | 2.01044178928938  | -4.06519128940384 |
| C | 2.13082478520171  | 3.53499132096030  | -4.42337262885068 |
| H | 2.42619364473752  | 1.41311890474480  | -4.00826504300834 |
| H | 2.75617326974947  | 2.43702896010519  | -2.59034304154584 |
| C | -0.32114166376829 | 3.22698955968049  | -5.01096165337761 |
| H | -0.23781766013779 | 1.07541613686036  | -4.66118919464668 |
| H | -1.41405739419790 | 1.88818716837406  | -3.60848190938807 |
| C | 1.10469550170290  | 3.41062863328589  | -5.56678190558374 |
| H | 3.16269533334002  | 3.64138250557492  | -4.82956172152402 |
| H | 1.91656333320316  | 4.46545205451758  | -3.84774910291380 |

|   |                   |                  |                   |
|---|-------------------|------------------|-------------------|
| H | -1.05596733734195 | 3.10963478707951 | -5.83966896877377 |
| H | -0.61839537660161 | 4.14663730541008 | -4.45149082787550 |
| H | 1.14944953644305  | 4.31141618434467 | -6.22054995110171 |
| H | 1.36854931358826  | 2.54245405352687 | -6.21944242705586 |
| H | 2.12059574812095  | 5.36268240483424 | -1.81855213705882 |
| H | 3.90427374856640  | 5.15100919198947 | -2.05786905126295 |
| H | 3.29635392015528  | 6.26595738578789 | -0.77065744771328 |

---

### PS-C(Me)-PH3

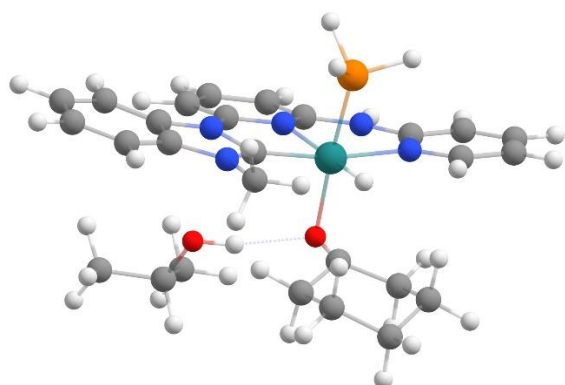

|    |                   |                   |                   |
|----|-------------------|-------------------|-------------------|
| Ru | -0.43746762568256 | 1.84255675986350  | -0.46168626454673 |
| H  | -1.04812069857229 | 3.37702447245006  | -0.44890989526299 |
| P  | -1.22262090614126 | 2.00116073691093  | 1.65057782381665  |
| N  | -1.41242536387064 | -1.23714005258152 | -1.28141582142757 |
| N  | 2.04078548382702  | 3.36644754324783  | 0.73364214514361  |
| N  | -2.33965942026752 | 0.98665752635780  | -1.03782735586821 |
| N  | 2.19648287092015  | 1.17306075799470  | 0.50470635887920  |
| N  | 0.45473204659044  | -0.08655889719910 | -0.33221393702744 |
| C  | 3.41183857779096  | 1.58291164982749  | 1.09504480035201  |
| C  | -2.47813003445256 | -0.33559831183261 | -1.33080410160770 |
| C  | 2.56019855668489  | -1.24027311228256 | 0.02656272272221  |

|   |                   |                   |                   |
|---|-------------------|-------------------|-------------------|
| H | 3.62006785351207  | -1.21589371076431 | 0.30711992152929  |
| C | -4.73011973212800 | 1.30163638562885  | -1.40859735509688 |
| H | -5.58875047109084 | 1.99300503320420  | -1.41680174006759 |
| C | -3.46222760685059 | 1.76895877268812  | -1.06642904111554 |
| H | -3.29521438877901 | 2.82866331213748  | -0.80994455926026 |
| C | 1.97455214428600  | -2.42274126984996 | -0.45949998966941 |
| H | 2.57423657156807  | -3.34729462018858 | -0.51770538532122 |
| C | 1.76329384174884  | -0.08637428561013 | 0.07387768081554  |
| C | -3.74097166569863 | -0.88021270936767 | -1.70721018087435 |
| H | -3.82118400239983 | -1.95464519083979 | -1.95182230242178 |
| C | 4.56167745232587  | 0.91525688590884  | 1.55313493443613  |
| H | 4.68026165162758  | -0.17649526583998 | 1.49971067927404  |
| C | 1.35020097752917  | 2.28288883987493  | 0.25497433150646  |
| C | 3.30134047734973  | 2.99264633923759  | 1.23476338691807  |
| C | 5.47911532185927  | 3.09815742169926  | 2.23730802962654  |
| H | 6.30718559528543  | 3.67561559442403  | 2.68316746886856  |
| C | 4.32231760725275  | 3.77165661474782  | 1.79953362439306  |
| H | 4.22830270021786  | 4.86613940401682  | 1.89719154599728  |
| C | 5.59034136760347  | 1.69553577918408  | 2.11964182155809  |
| H | 6.50289667828055  | 1.19079092430185  | 2.48101345161372  |
| C | 0.64435031035898  | -2.42798169033512 | -0.88855568722068 |
| H | 0.17942052782680  | -3.34881941718000 | -1.28140529958071 |
| C | -4.86803290731752 | -0.06156960428240 | -1.75000612944869 |
| H | -5.84764174874393 | -0.48063177232886 | -2.03851485527367 |
| C | -0.09551434172062 | -1.21818114523372 | -0.82421874325589 |

|   |                   |                   |                   |
|---|-------------------|-------------------|-------------------|
| H | -1.68776880023148 | -2.16920405668228 | -1.60801432430299 |
| O | 0.17977879608929  | 1.60310809657839  | -2.54748511940580 |
| C | -0.20858658803468 | 2.83373658088003  | -2.66986603803959 |
| C | 0.81828115662223  | 3.96492458727501  | -2.73336509348074 |
| C | -1.51057222034877 | 3.12670131546052  | -3.41644591502379 |
| C | 0.22532378379266  | 5.37597648553838  | -2.53214019564977 |
| H | 1.23059918545046  | 3.89981381992955  | -3.77512617771606 |
| H | 1.68235657810055  | 3.75381493524831  | -2.06871530219984 |
| C | -2.08089137749006 | 4.53991664922003  | -3.18444840552404 |
| H | -1.22569551069776 | 3.02769034530529  | -4.49712260123849 |
| H | -2.25673911390228 | 2.32579245692963  | -3.23991771086552 |
| C | -1.00947534431459 | 5.62248015348780  | -3.42075647183162 |
| H | 1.01185761071952  | 6.13968408325678  | -2.73071133584630 |
| H | -0.07414991371051 | 5.50230951696413  | -1.46579026228332 |
| H | -2.96011383740771 | 4.70236464948245  | -3.84871424614063 |
| H | -2.45699569273168 | 4.61875480862710  | -2.13555747544229 |
| H | -1.43018959222101 | 6.63416443806772  | -3.21989650798884 |
| H | -0.70787552966831 | 5.62100128619896  | -4.49694024700242 |
| C | 3.30746801912067  | -0.47132396214340 | -3.84679850932936 |
| C | 3.82357550887651  | 0.88716127916255  | -3.33615133572818 |
| H | 3.77582709994686  | 1.62000169528557  | -4.18862775293463 |
| H | 2.25082678326213  | -0.39796486058421 | -4.19313972108622 |
| H | 3.91368387999871  | -0.83680873280901 | -4.70658409475543 |
| H | 3.35215592324016  | -1.24001043483397 | -3.04127703362931 |
| C | 5.27637673067715  | 0.82117039934545  | -2.84924962411278 |

|   |                   |                  |                   |
|---|-------------------|------------------|-------------------|
| H | 5.60856474722743  | 1.81179859650586 | -2.46800009624576 |
| H | 5.38205951776803  | 0.08356863312802 | -2.02029656644272 |
| H | 5.96163545798317  | 0.51800299719043 | -3.67133600033162 |
| O | 3.03117928971644  | 1.37085400890296 | -2.23894813067722 |
| H | 2.07618096460325  | 1.38062371063360 | -2.50614546949302 |
| H | -0.94091988045745 | 0.95391234374012 | 2.60492744561742  |
| H | -2.64890233617059 | 2.07615534705506 | 1.85043732443147  |
| H | -0.83895889058698 | 3.11490667747678 | 2.47573216590453  |
| C | 1.53685164318108  | 4.73464612775819 | 0.77423794649708  |
| H | 0.48837520973761  | 4.72731557173325 | 0.41604084208458  |
| H | 2.14435557456378  | 5.40151696028569 | 0.12266303514029  |
| H | 1.57114346656599  | 5.12573379240920 | 1.81567692196992  |

---

**NPS-TS-II(Me)-PH3**

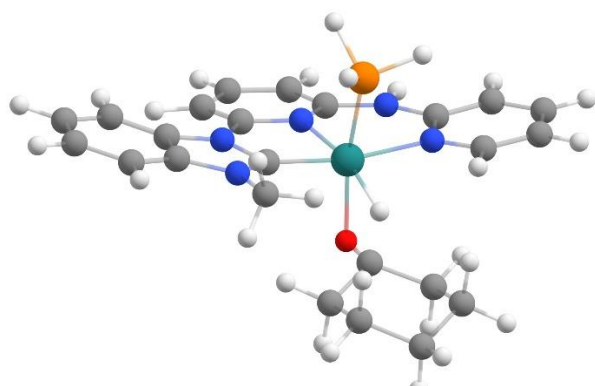

|    |                   |                   |                   |
|----|-------------------|-------------------|-------------------|
| Ru | -0.29391977974727 | 1.78930651115871  | -0.71500043339327 |
| H  | -0.77127121480604 | 3.34712602378350  | -1.32380761177012 |
| P  | -1.05416312604311 | 2.05848328920743  | 1.41804548754765  |
| N  | -1.35010724037239 | -1.30330977596791 | -1.27868064265333 |



|   |                   |                   |                   |
|---|-------------------|-------------------|-------------------|
| N | 2.15464001819345  | 3.37010534364926  | 0.44953354022334  |
| N | -2.23470621920705 | 0.93673305978188  | -1.17598142278425 |
| N | 2.37525289316007  | 1.18935723633125  | 0.14727829829903  |
| N | 0.56950754576321  | -0.08867701971929 | -0.51266232235314 |
| C | 3.57199799509626  | 1.61245015806990  | 0.77280098325588  |
| C | -2.41242875176022 | -0.40017736257213 | -1.33972785361734 |
| C | 2.71087157396230  | -1.23309517554088 | -0.28050410401181 |
| H | 3.78937974603708  | -1.19131547776783 | -0.08000844143158 |
| C | -4.63640160435744 | 1.26889218548981  | -1.42934455684684 |
| H | -5.48300472586686 | 1.97466389280720  | -1.44920079056743 |
| C | -3.34145273983661 | 1.73797763804273  | -1.20898003828444 |
| H | -3.14802900602721 | 2.81223730185836  | -1.04641708302203 |
| C | 2.09866711201253  | -2.43651402962202 | -0.67595497049958 |
| H | 2.69630279755204  | -3.36097266702508 | -0.74979197937945 |
| C | 1.91204971395101  | -0.08355887442087 | -0.20524618616538 |
| C | -3.70301788052505 | -0.95339751652741 | -1.58078430671542 |
| H | -3.81516206309052 | -2.04416305176724 | -1.71568667729853 |
| C | 4.73296152568462  | 0.95921185066255  | 1.22253663460676  |
| H | 4.87832808109869  | -0.12761356693637 | 1.13553166020792  |
| C | 1.48827649246834  | 2.27657731820967  | -0.05132179213872 |
| C | 3.42132146765418  | 3.01514145785771  | 0.94981835603466  |
| C | 5.58597964121451  | 3.14389771930309  | 1.97984652542748  |
| H | 6.39381185190994  | 3.72902133302229  | 2.45207396070895  |
| C | 4.41791148732178  | 3.80198654324189  | 1.54719101736320  |
| H | 4.29603096653239  | 4.89040602640120  | 1.67667398628819  |

|   |                   |                   |                   |
|---|-------------------|-------------------|-------------------|
| C | 5.73487103631055  | 1.74856371452004  | 1.82451253014994  |
| H | 6.65567904527472  | 1.25690281959065  | 2.18280506123759  |
| C | 0.73968485274832  | -2.45411682299863 | -0.99730096095024 |
| H | 0.24879272517328  | -3.38759968280360 | -1.32311815808346 |
| C | -4.81724483676910 | -0.11667374543796 | -1.63033584909559 |
| H | -5.82026156047659 | -0.53900627617923 | -1.81478097785099 |
| C | -0.00520870314078 | -1.24799271112876 | -0.92310793642388 |
| H | -1.64113839166537 | -2.25567473146526 | -1.52285398090314 |
| O | 0.15163934648072  | 1.78197043095176  | -2.76500131272698 |
| C | -0.28395661480301 | 3.02962098191380  | -2.74651363023067 |
| C | 0.75856130140291  | 4.15943705387524  | -2.90220376306477 |
| C | -1.57668307458442 | 3.32498164085144  | -3.53857985813691 |
| C | 0.17904096679918  | 5.57500663147213  | -2.69824779340083 |
| H | 1.12804186766634  | 4.05751785620323  | -3.95282806013119 |
| H | 1.63852967614365  | 3.96241147005417  | -2.25325987891601 |
| C | -2.14352591341257 | 4.73965701002298  | -3.31313755687014 |
| H | -1.27344591039057 | 3.21045535559092  | -4.60917734082986 |
| H | -2.33040169219027 | 2.52982851548366  | -3.36112981435170 |
| C | -1.07308291846769 | 5.82124496649278  | -3.56437471710893 |
| H | 0.96278586801201  | 6.33677925224796  | -2.91546358359243 |
| H | -0.09742602491858 | 5.71609064425898  | -1.62463374647199 |
| H | -3.02812233948917 | 4.90137065288735  | -3.97068940300332 |
| H | -2.51992995154254 | 4.83077397666164  | -2.26278460431153 |
| H | -1.48849574462813 | 6.83452502313247  | -3.36048444765228 |
| H | -0.78758608435788 | 5.81468331781939  | -4.64449340826998 |

|   |                   |                  |                   |
|---|-------------------|------------------|-------------------|
| H | -0.76060477237350 | 3.25617089521590 | 2.16671412111978  |
| H | -2.47834383482904 | 2.03798331896667 | 1.65751099688170  |
| H | -0.68143268442645 | 1.12611746542049 | 2.46033777961640  |
| C | 1.61174839412522  | 4.72207855492141 | 0.53043151262781  |
| H | 0.57290110944426  | 4.70692206130183 | 0.14571698127254  |
| H | 2.21575224846862  | 5.43101053244997 | -0.07850730260599 |
| H | 1.60731605644318  | 5.07353945669495 | 1.58656986504673  |

---

### PS-TS-II(Me)-PH3

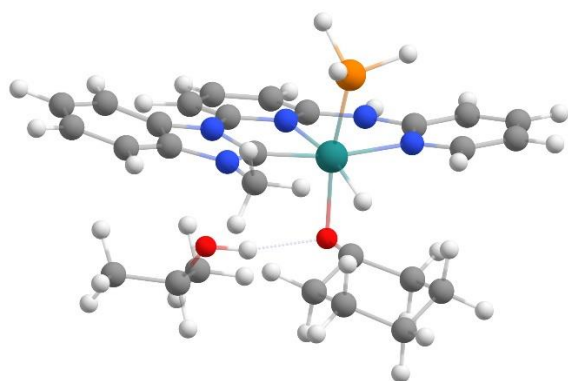

|    |                   |                   |                   |
|----|-------------------|-------------------|-------------------|
| Ru | -0.35371087009375 | 1.76513922624059  | -0.58069828268597 |
| H  | -0.81046078932076 | 3.33132173189140  | -1.13435509674724 |
| P  | -1.16678167635387 | 2.05038629450228  | 1.52187656690158  |
| N  | -1.37684960401810 | -1.31156666511920 | -1.26122841090736 |
| N  | 2.09197477875126  | 3.32773906681239  | 0.63899514805499  |
| N  | -2.27743053317407 | 0.91952064746515  | -1.11006123070456 |
| N  | 2.23722750795601  | 1.12867170175242  | 0.48894071835610  |
| N  | 0.48446534693499  | -0.12675630302558 | -0.32547425639535 |
| C  | 3.43389669133553  | 1.54701014053171  | 1.10907715052713  |
| C  | -2.44220372340606 | -0.41283622753047 | -1.32343226621585 |
| C  | 2.58740807608079  | -1.29141041334103 | 0.07125233290242  |

|   |                   |                   |                   |
|---|-------------------|-------------------|-------------------|
| H | 3.64507500724059  | -1.26109762578021 | 0.36130755051230  |
| C | -4.67411091326165 | 1.24620136759730  | -1.41883291835686 |
| H | -5.52448580547977 | 1.94747900727457  | -1.43712369111493 |
| C | -3.38937690332059 | 1.71427990688033  | -1.14469692896458 |
| H | -3.20786196154839 | 2.78376114652633  | -0.94213475119726 |
| C | 2.00356732782996  | -2.48168418089951 | -0.39559035102684 |
| H | 2.59934380366945  | -3.40951383509328 | -0.43388861339080 |
| C | 1.79671285487698  | -0.13364070436998 | 0.08990147595968  |
| C | -3.72164830050742 | -0.96325157884535 | -1.62430229709050 |
| H | -3.82248402037717 | -2.04930117039957 | -1.79986078468504 |
| C | 4.55676934053827  | 0.88310230759660  | 1.63368116116412  |
| H | 4.66128560613209  | -0.21167064310835 | 1.62428722491602  |
| C | 1.41279422712872  | 2.23245891444149  | 0.16820874545234  |
| C | 3.33137041680407  | 2.96151475772601  | 1.19608563381377  |
| C | 5.47140077344509  | 3.07963569405597  | 2.27592045766278  |
| H | 6.28844589207313  | 3.66451009972186  | 2.73233218906634  |
| C | 4.33876464220261  | 3.74927139132667  | 1.77277134631668  |
| H | 4.25345767115194  | 4.84728035245288  | 1.83091334724284  |
| C | 5.57225003961440  | 1.67280687564448  | 2.21134229196333  |
| H | 6.46499641030574  | 1.17251556689031  | 2.62459509252774  |
| C | 0.67658380915286  | -2.48456922529808 | -0.83329297463739 |
| H | 0.20818634287139  | -3.40909471508491 | -1.21307813920249 |
| C | -4.83959464482586 | -0.13193279220058 | -1.67715813214858 |
| H | -5.83383461863106 | -0.55287963594246 | -1.90676647592347 |
| C | -0.06319996416674 | -1.27459383814227 | -0.79790275880933 |

|   |                   |                   |                   |
|---|-------------------|-------------------|-------------------|
| H | -1.65094388020483 | -2.25471866342624 | -1.55539048505429 |
| O | 0.15833399971530  | 1.74428170256679  | -2.64277473863013 |
| C | -0.28213515193424 | 2.99510229741824  | -2.61465550507012 |
| C | 0.75529432097879  | 4.12656629476548  | -2.75315816461436 |
| C | -1.56934945828677 | 3.28456739427198  | -3.40970668033836 |
| C | 0.16823148203285  | 5.53941826429779  | -2.55360031921379 |
| H | 1.12914132360107  | 4.03161707244797  | -3.80363523724263 |
| H | 1.63801346640295  | 3.92743265139261  | -2.10948117412138 |
| C | -2.14609850885784 | 4.69418749065938  | -3.18048366860783 |
| H | -1.25567606539128 | 3.18213695508180  | -4.47895954165796 |
| H | -2.31951524172070 | 2.48355848028969  | -3.24830652168064 |
| C | -1.08069961685618 | 5.78206469378413  | -3.42484561704383 |
| H | 0.95190622055080  | 6.30166385759941  | -2.76861177180505 |
| H | -0.11333125749209 | 5.68227045665223  | -1.48218562630845 |
| H | -3.02910502032352 | 4.85139739618965  | -3.84105788749262 |
| H | -2.52624630125356 | 4.77850331796478  | -2.13123468096570 |
| H | -1.50215079835381 | 6.79247925418761  | -3.21954951209070 |
| H | -0.79129623140485 | 5.78023485930548  | -4.50396425343717 |
| C | 3.23798653422351  | -0.45539070163845 | -3.79754586008861 |
| C | 3.77939736784309  | 0.91177934167428  | -3.33763579995150 |
| H | 3.78384604706619  | 1.60060649939101  | -4.22737497890600 |
| H | 2.19453607716892  | -0.36871144162605 | -4.17852417470876 |
| H | 3.85798365211291  | -0.88049812688226 | -4.61935937564394 |
| H | 3.23732203350081  | -1.18357320515654 | -2.95387632286496 |
| C | 5.21349202776946  | 0.82619293753659  | -2.79988004698617 |

|   |                   |                  |                   |
|---|-------------------|------------------|-------------------|
| H | 5.56757715130527  | 1.82542585516009 | -2.46323592672859 |
| H | 5.26802400888239  | 0.13396190789527 | -1.92776723106609 |
| H | 5.91397053559311  | 0.45468001805576 | -3.58009839390795 |
| O | 2.96841363150463  | 1.47335172090240 | -2.29429068123972 |
| H | 2.02361246790300  | 1.51693967205848 | -2.59841565296326 |
| H | -0.82348756903142 | 1.11814728216725 | 2.57354151410498  |
| H | -2.59663545496505 | 2.04000590459728 | 1.72303644845736  |
| H | -0.87904149215752 | 3.25164790635690 | 2.26527902740830  |
| C | 1.59496134734116  | 4.69821846666499 | 0.63221421430432  |
| H | 0.56083167302759  | 4.69453458566830 | 0.23572579548404  |
| H | 2.23028273043934  | 5.35045270819400 | -0.00740173638316 |
| H | 1.58911171165976  | 5.10965825038172 | 1.66643049391912  |

---

**NPS-D(Me)-PH3**

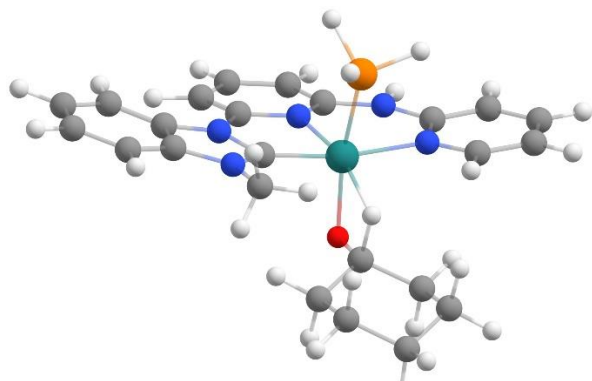

|    |                   |                  |                   |
|----|-------------------|------------------|-------------------|
| Ru | -0.40574970091646 | 1.52797255614959 | -0.87412447543579 |
|----|-------------------|------------------|-------------------|

|   |                   |                   |                   |
|---|-------------------|-------------------|-------------------|
| H | -0.68534564627417 | 3.04315054780019  | -1.83201975572040 |
| P | -1.09089903317962 | 2.11986171481545  | 1.23167424258775  |
| N | -1.83080683935117 | -1.44654722498224 | -1.04135123795378 |
| N | 2.22746471192038  | 2.95836724793866  | 0.05507572193687  |
| N | -2.44009889651915 | 0.87348551850631  | -1.22826090114766 |
| N | 2.19090084862395  | 0.74599454127590  | 0.04743471819510  |
| N | 0.23311372167120  | -0.37525828931047 | -0.44298344213211 |
| C | 3.44370695885091  | 1.10616628774755  | 0.59906524362639  |
| C | -2.77923936369827 | -0.44073328594903 | -1.22851481009812 |
| C | 2.22111175286143  | -1.73410406354751 | -0.04142836311179 |
| H | 3.29805496688369  | -1.79845121864609 | 0.16150355507013  |
| C | -4.78250426731289 | 1.46276226653138  | -1.54588818476482 |
| H | -5.53715223905849 | 2.25802641537153  | -1.66086535019548 |
| C | -3.43895214368145 | 1.79431356829974  | -1.37046009115953 |
| H | -3.11668405702258 | 2.84976536679615  | -1.33583864084047 |
| C | 1.46260083101809  | -2.89585354328377 | -0.27231957386186 |
| H | 1.94112683249389  | -3.88820270728305 | -0.21459722601302 |
| C | 1.57232421055329  | -0.49524385954029 | -0.13072536728560 |
| C | -4.12805847920730 | -0.85952134967347 | -1.41427277790185 |
| H | -4.37325633495189 | -1.93673353791576 | -1.41689031877053 |
| C | 4.53427310358566  | 0.38849146282989  | 1.12059775656527  |
| H | 4.55368415900093  | -0.70974863743687 | 1.17805192110280  |
| C | 1.43069972043132  | 1.89216260626596  | -0.28793465608974 |
| C | 3.45769029079856  | 2.52806621137648  | 0.58665824915289  |
| C | 5.64802713165731  | 2.54086413359059  | 1.56907840783242  |

|   |                   |                   |                   |
|---|-------------------|-------------------|-------------------|
| H | 6.52852692686265  | 3.08613765699732  | 1.95034236189301  |
| C | 4.55155860682990  | 3.26655688853993  | 1.06311037665504  |
| H | 4.55703563971980  | 4.36925755879314  | 1.04603199916001  |
| C | 5.63412307352959  | 1.12950614419608  | 1.60099239498027  |
| H | 6.50233356484054  | 0.58653155134209  | 2.01250207966875  |
| C | 0.10855771269627  | -2.78872746209206 | -0.59637888275601 |
| H | -0.49697731745529 | -3.69009891118487 | -0.79469876006460 |
| C | -5.13134747275868 | 0.09504845792270  | -1.57813437266885 |
| H | -6.17921196699603 | -0.22118946217803 | -1.72098336807100 |
| C | -0.48462759101873 | -1.50299009193023 | -0.69201643300912 |
| H | -2.23337715465157 | -2.38223946359736 | -1.15849933334927 |
| O | -0.01948300684336 | 1.25295087700324  | -2.89246002439446 |
| C | -0.31289841173521 | 2.55843079864056  | -3.02843841682383 |
| C | 0.87056751280492  | 3.49589047926007  | -3.38001427688176 |
| C | -1.55191105371171 | 2.87545637221184  | -3.90414688253332 |
| C | 0.48261725701369  | 4.98941987641820  | -3.40706547673633 |
| H | 1.20465282757351  | 3.17594930965940  | -4.39706350039405 |
| H | 1.72844363913301  | 3.29427605104269  | -2.70250406098941 |
| C | -1.93330953791282 | 4.36845479545682  | -3.91473381935241 |
| H | -1.26318035005684 | 2.55086928024834  | -4.93378507347494 |
| H | -2.40505141942657 | 2.22513538768288  | -3.61696005911386 |
| C | -0.73564520440558 | 5.25431589318356  | -4.31541783931959 |
| H | 1.35565245173095  | 5.59995621794847  | -3.73410388988427 |
| H | 0.23928479709091  | 5.33533654765806  | -2.37175928113759 |
| H | -2.79280303964593 | 4.53488968825250  | -4.60385853865104 |



|   |                   |                  |                   |
|---|-------------------|------------------|-------------------|
| H | -2.29384253132146 | 4.67207718462366 | -2.89873057491318 |
| H | -1.01827879741470 | 6.33122155383245 | -4.27797093958736 |
| H | -0.46029994207554 | 5.04226544751669 | -5.37717134126125 |
| H | -0.72466423322840 | 1.31050379322567 | 2.37368174076065  |
| H | -0.72592800888453 | 3.38738546169857 | 1.81942250560871  |
| H | -2.50573757459709 | 2.19845154847746 | 1.51327545381799  |
| C | 1.83958307577967  | 4.36201150064160 | -0.03468652524838 |
| H | 0.79551361295687  | 4.41921332143547 | -0.40137402633946 |
| H | 2.50219081940134  | 4.91515678078668 | -0.73676349316225 |
| H | 1.90045085699928  | 4.84365623855948 | 0.96698563398615  |

---

### PS-D(Me)-PH3

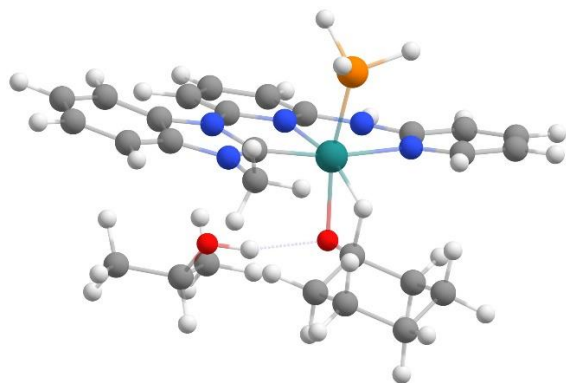

|    |                   |                   |                   |
|----|-------------------|-------------------|-------------------|
| Ru | -0.30267162310570 | 1.73679687850359  | -0.55589649094953 |
| H  | -0.75599419182617 | 3.35697694502750  | -1.24870223864700 |
| P  | -1.10996065602911 | 1.92756542428567  | 1.57195125251252  |
| N  | -1.25086623597580 | -1.32225794334676 | -1.34941782045289 |
| N  | 2.12871953127879  | 3.33088867209659  | 0.68745701754816  |
| N  | -2.19908592814624 | 0.87366321663135  | -1.13581661341808 |
| N  | 2.28846938155901  | 1.13350078125359  | 0.54595106207136  |
| N  | 0.55938360205663  | -0.12023444768560 | -0.32257159534809 |

|   |                   |                   |                   |
|---|-------------------|-------------------|-------------------|
| C | 3.49536128204139  | 1.56286932250573  | 1.14258867418279  |
| C | -2.32848777133694 | -0.44355364602032 | -1.43498998548438 |
| C | 2.63228166015892  | -1.29641761264723 | 0.19700654232937  |
| H | 3.66995360978296  | -1.27167248125642 | 0.55129871367624  |
| C | -4.58436138950617 | 1.18038125671196  | -1.52843328303786 |
| H | -5.44812446821887 | 1.86522780372652  | -1.53532277430083 |
| C | -3.32307895560208 | 1.64993402218082  | -1.16205201615964 |
| H | -3.17706432741472 | 2.70407243337063  | -0.86829239293992 |
| C | 2.06425722360691  | -2.49285715425690 | -0.27002780460130 |
| H | 2.65132705134118  | -3.42661928933768 | -0.25336451822745 |
| C | 1.85565571950173  | -0.13027710407238 | 0.14837789757861  |
| C | -3.57844733891480 | -0.99388985645785 | -1.84036663741800 |
| H | -3.64860535942836 | -2.06696567881902 | -2.09324020155705 |
| C | 4.63424532256106  | 0.91578972486910  | 1.65514717303844  |
| H | 4.75433150383934  | -0.17726198028388 | 1.65882125536494  |
| C | 1.45794237434115  | 2.22845034156692  | 0.22024442943888  |
| C | 3.38425890385770  | 2.97585032533455  | 1.21858449485003  |
| C | 5.54168523006234  | 3.12797598069013  | 2.25602991513127  |
| H | 6.36272394546528  | 3.72487239186156  | 2.68907820154220  |
| C | 4.39257502452890  | 3.78109057699136  | 1.76952787816817  |
| H | 4.29660132357726  | 4.87840055426189  | 1.81933297028380  |
| C | 5.65315097324494  | 1.72137642055712  | 2.20372461013926  |
| H | 6.55860629823133  | 1.23281372448098  | 2.60312019200265  |
| C | 0.76185242417126  | -2.49150263486580 | -0.77569015009232 |
| H | 0.30327021220817  | -3.41880647878096 | -1.16050310752212 |

|   |                   |                   |                   |
|---|-------------------|-------------------|-------------------|
| C | -4.70773953590652 | -0.17790974754285 | -1.89397451655039 |
| H | -5.68078095886219 | -0.59737582395159 | -2.20328092722941 |
| C | 0.02972456620506  | -1.27740974256078 | -0.80308666044668 |
| H | -1.48970954337946 | -2.26222536941504 | -1.68186041666749 |
| O | 0.12776115819435  | 1.87573223696690  | -2.60483732901677 |
| C | -0.32751426871694 | 3.14375500417949  | -2.50055666621864 |
| C | 0.70871270260368  | 4.27683188336798  | -2.69307332346847 |
| C | -1.60590683459294 | 3.44513128186961  | -3.32707485752055 |
| C | 0.12389230680591  | 5.68342413259010  | -2.43989468512731 |
| H | 1.01097155638397  | 4.20757377001749  | -3.76708703304777 |
| H | 1.63239294966542  | 4.06622224873643  | -2.11155055341688 |
| C | -2.19981455747109 | 4.84011188947070  | -3.05632821614200 |
| H | -1.27867543562914 | 3.38553184207650  | -4.39386052842522 |
| H | -2.35103077831993 | 2.63254520908908  | -3.20106749918277 |
| C | -1.14552717807385 | 5.94556162379273  | -3.27701879170561 |
| H | 0.89977104262306  | 6.45449965245715  | -2.65210706931615 |
| H | -0.14173955356264 | 5.80579657133778  | -1.36174399572841 |
| H | -3.08245364006945 | 5.00801927977285  | -3.71515834366084 |
| H | -2.58684247284982 | 4.89350940157501  | -2.00692526784283 |
| H | -1.56933110023449 | 6.94472985033580  | -3.02592066901529 |
| H | -0.87928606172583 | 5.98634246323462  | -4.36113431462723 |
| C | 2.91512323589977  | -0.49465836904978 | -3.75632094754842 |
| C | 3.61499443795162  | 0.81320521302658  | -3.33732509789266 |
| H | 3.67634473832142  | 1.47860871188906  | -4.24274495869532 |
| H | 1.87771188348137  | -0.30011337251328 | -4.11259761780967 |

|   |                   |                   |                   |
|---|-------------------|-------------------|-------------------|
| H | 3.46236919246977  | -1.00040142336123 | -4.58438134223507 |
| H | 2.85932490021444  | -1.20396818136104 | -2.89849870392401 |
| C | 5.04311138209948  | 0.57711134542139  | -2.82918599453376 |
| H | 5.51073540616836  | 1.53532238128432  | -2.51238434716094 |
| H | 5.04192476986812  | -0.10971500514458 | -1.95113779153240 |
| H | 5.68143304829414  | 0.12419882648964  | -3.61978795385010 |
| O | 2.89317448582116  | 1.48320252098996  | -2.29362272020849 |
| H | 1.94913473133660  | 1.60996019136022  | -2.58453074958055 |
| H | -0.72698763232421 | 0.97471993935517  | 2.59115833652300  |
| H | -2.53678633119083 | 1.86236898518480  | 1.78634903849000  |
| H | -0.85715335532327 | 3.11447424422283  | 2.35135136911050  |
| C | 1.65950559410740  | 4.69874772357268  | 0.64645452162069  |
| H | 0.63568559448365  | 4.72966504369844  | 0.22510950008290  |
| H | 2.31317143574735  | 5.35315491942694  | 0.02554133838784  |
| H | 1.61735376757521  | 5.14504815903110  | 1.66753113541096  |

---

**E(Me)-PH3**

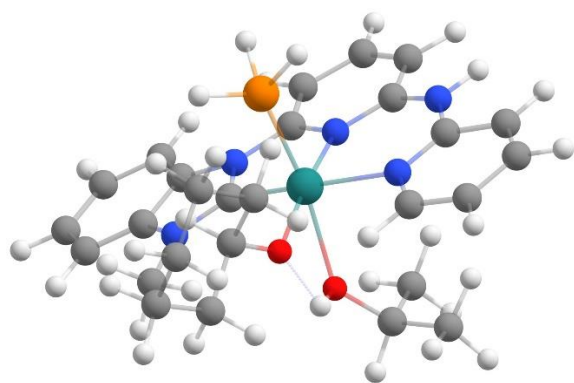

|    |                   |                   |                   |
|----|-------------------|-------------------|-------------------|
| Ru | 0.20684980257885  | 1.48514069958252  | -1.12085486578798 |
| H  | 0.07294429327831  | 4.76862212009276  | -1.15998577075446 |
| P  | -0.90202149391447 | 2.27996830802058  | 0.66250296996585  |
| N  | -1.39995491702313 | -1.37686508876910 | -0.64894471305364 |
| N  | 2.91138981176380  | 2.91469413375159  | -0.41750525964046 |
| N  | -1.57735002110572 | 0.61253744392013  | -1.99926349229735 |
| N  | 2.47508694868157  | 0.99450302476123  | 0.58644283831527  |
| N  | 0.60687143107325  | -0.21987589257774 | -0.02527831005467 |
| C  | 3.76096740195605  | 1.37753389006875  | 1.03856853862010  |
| C  | -2.04402724983746 | -0.60502663572124 | -1.62106585083980 |
| C  | 2.10054202804825  | -1.22923352569357 | 1.62659356077549  |
| H  | 2.99865804194006  | -1.16737555442576 | 2.25315278740426  |
| C  | -3.41552035967282 | 0.80859365232921  | -3.57880443662653 |
| H  | -3.91752757756760 | 1.40845324192175  | -4.35594147252569 |
| C  | -2.25342728929353 | 1.28844805454329  | -2.97261420067871 |
| H  | -1.78111266805475 | 2.25113501062258  | -3.24095194159397 |
| C  | 1.26812093037332  | -2.36157950327903 | 1.68354464100243  |
| H  | 1.52456622061354  | -3.20336682771989 | 2.34873906278261  |
| C  | 1.74314488185706  | -0.18625669450125 | 0.76052388019414  |

|   |                   |                   |                   |
|---|-------------------|-------------------|-------------------|
| C | -3.22146753542391 | -1.16134071117683 | -2.19493319063813 |
| H | -3.57800107123508 | -2.15407271744095 | -1.86594554800883 |
| C | 4.71332672392296  | 0.82016899405795  | 1.91135411491165  |
| H | 4.56171675304718  | -0.13282732773296 | 2.43813113027974  |
| C | 1.93958450861084  | 1.95832375074929  | -0.30911726288968 |
| C | 4.02454908045288  | 2.61423060981905  | 0.38822026097883  |
| C | 6.16599489425043  | 2.76021557505515  | 1.46337025498351  |
| H | 7.11705020699055  | 3.28920005774032  | 1.64691404344460  |
| C | 5.21864971333105  | 3.32398532187303  | 0.58751657786145  |
| H | 5.41049774749498  | 4.28599500257412  | 0.08358488853280  |
| C | 5.91522861873575  | 1.53041814108993  | 2.10993644005807  |
| H | 6.67445773500312  | 1.10962797085726  | 2.79151210173708  |
| C | 0.11101538743648  | -2.40815444916905 | 0.90341205445376  |
| H | -0.56145957915035 | -3.28282175496539 | 0.94242323138999  |
| C | -3.91434523983148 | -0.44703415376100 | -3.17394244029719 |
| H | -4.83051010722158 | -0.86943554868180 | -3.62246945019623 |
| C | -0.20648414341081 | -1.30773428242548 | 0.06551056681982  |
| H | -1.90495646003352 | -2.24909727552756 | -0.45991128696654 |
| O | -0.07623591022369 | 3.09978947882547  | -2.42476791864535 |
| C | -0.45384917135441 | 4.42609317444126  | -2.09974539769575 |
| C | -0.02993016226424 | 5.39005148743943  | -3.23630050982189 |
| C | -1.97363419591484 | 4.59750002132255  | -1.83989966115040 |
| C | -0.38118224921704 | 6.85919654445081  | -2.90998400880126 |
| H | -0.54677358659972 | 5.07035501766557  | -4.17470727873364 |
| H | 1.06262763587226  | 5.28664567435067  | -3.43691384778695 |

|   |                   |                   |                   |
|---|-------------------|-------------------|-------------------|
| C | -2.32510862032533 | 6.05396216330960  | -1.46714731847426 |
| H | -2.53372219668510 | 4.30939995056159  | -2.76331576997862 |
| H | -2.31888781685904 | 3.89569699693839  | -1.04381512903647 |
| C | -1.87748500709659 | 7.03251045598990  | -2.57365980934656 |
| H | -0.09466756822061 | 7.51779554013276  | -3.76221671675542 |
| H | 0.23359004715856  | 7.19944060663479  | -2.03987145805957 |
| H | -3.41907762876026 | 6.15107021705709  | -1.27712117476114 |
| H | -1.81989900975792 | 6.32176442502442  | -0.50560668639195 |
| H | -2.08775826238333 | 8.08429501536633  | -2.27108206587644 |
| H | -2.48656025477233 | 6.84753553351377  | -3.49262536531613 |
| C | 0.29454056284079  | -0.21050462308212 | -4.84992771633979 |
| C | 1.53135412686226  | 0.02492387507604  | -3.97204439514117 |
| H | 2.37914059304236  | 0.34557672899292  | -4.62931517999608 |
| H | -0.04735178241075 | 0.72978059627073  | -5.33792462727705 |
| H | 0.53852918682900  | -0.93173954259771 | -5.66194187694936 |
| H | -0.55466013382544 | -0.63127617382606 | -4.26873560007422 |
| C | 1.96612132442599  | -1.21806064204005 | -3.19211792509224 |
| H | 2.84549136870574  | -1.00188420441391 | -2.54680989968915 |
| H | 1.14129515536678  | -1.60158852561276 | -2.55078210148381 |
| H | 2.25122572505321  | -2.03003485179519 | -3.89620139907764 |
| O | 1.34499379772876  | 1.11043740721376  | -3.01479902596098 |
| H | 0.98200350431214  | 1.95469240233798  | -3.41990815521765 |
| H | -0.56967077083019 | 1.72917855033702  | 1.95817350717412  |
| H | -2.33581779607839 | 2.13830175409903  | 0.75395403194124  |
| H | -0.80374452363114 | 3.67520929184665  | 1.01297458069150  |

|   |                  |                  |                   |
|---|------------------|------------------|-------------------|
| C | 2.84767594894282 | 4.07846321739844 | -1.29772705024445 |
| H | 1.99939963132147 | 3.93236155446593 | -1.99364046175632 |
| H | 3.79216660709657 | 4.15781183479734 | -1.87920028124620 |
| H | 2.70476398298753 | 5.01462198764550 | -0.71305075929050 |

---

**TS-III(Me)-PH3**

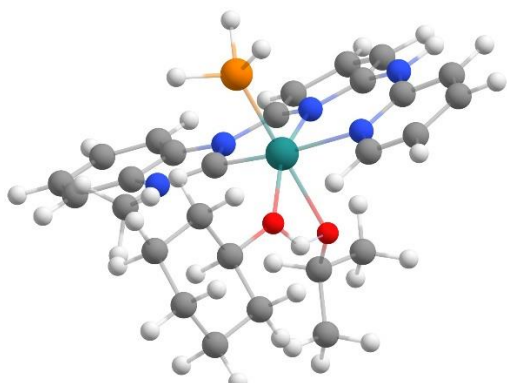

|    |                   |                   |                   |
|----|-------------------|-------------------|-------------------|
| Ru | -0.21801305985459 | 1.30928363627295  | -1.00681039491322 |
| H  | 0.77366555259638  | 4.53087056178760  | -2.51767441836036 |
| P  | -1.26613354840858 | 2.06494112354532  | 0.86874848666560  |
| N  | -1.81272438109533 | -1.57933694431955 | -0.73128163989138 |
| N  | 2.33844558619845  | 2.79867815823342  | 0.09851940489551  |
| N  | -2.15712764904403 | 0.58360864971162  | -1.72431960291867 |
| N  | 2.22531986786267  | 0.60392240643688  | 0.31752640060431  |
| N  | 0.27044103043993  | -0.50301580480164 | -0.21476925237881 |
| C  | 3.45878231372175  | 0.98041681720722  | 0.89917989162802  |
| C  | -2.60325440005276 | -0.66131748494280 | -1.42671796058230 |
| C  | 2.10056999276535  | -1.84146684747442 | 0.70345581633026  |
| H  | 3.13544458767815  | -1.90823383163869 | 1.05957275632246  |
| C  | -4.27989022835283 | 1.05206398539164  | -2.81819521255934 |
| H  | -4.90175907811679 | 1.77258684342436  | -3.37473958294502 |



|   |                   |                   |                   |
|---|-------------------|-------------------|-------------------|
| C | -2.99134818345974 | 1.41133685645650  | -2.41758701104461 |
| H | -2.55198280567018 | 2.39368028749427  | -2.65711783683508 |
| C | 1.29315482882588  | -2.99103816789787 | 0.63255913591040  |
| H | 1.69316192272331  | -3.96899909142722 | 0.94936942379313  |
| C | 1.55451953780207  | -0.62138153911486 | 0.28499470889036  |
| C | -3.90384203709499 | -1.10178334449302 | -1.79912557758540 |
| H | -4.23476808752375 | -2.12296010479389 | -1.53753953596574 |
| C | 4.50974250597461  | 0.29176125782056  | 1.53217428384089  |
| H | 4.50980519584290  | -0.79694371986054 | 1.68410526925557  |
| C | 1.53197920386521  | 1.72800618632567  | -0.20665273496071 |
| C | 3.52067201504155  | 2.39126266662566  | 0.74377295556102  |
| C | 5.66452088723214  | 2.44939820471309  | 1.82283253754657  |
| H | 6.54344034681121  | 3.00771112967347  | 2.18849091702397  |
| C | 4.61435126347040  | 3.14635249868546  | 1.19469593712668  |
| H | 4.65771441193549  | 4.24015330905026  | 1.06136448870938  |
| C | 5.60845572037797  | 1.04876414059453  | 1.98859096778761  |
| H | 6.44381166525821  | 0.52597859270072  | 2.48541994526747  |
| C | -0.01015659406782 | -2.88744283671514 | 0.14778402729929  |
| H | -0.65846568473173 | -3.77789071154462 | 0.07576875425322  |
| C | -4.74871018570741 | -0.23785498614034 | -2.49639025885410 |
| H | -5.76029310753532 | -0.56833690951400 | -2.79004206526818 |
| C | -0.50170580969298 | -1.62416367823122 | -0.27641018144576 |
| H | -2.28291078348320 | -2.48432994876342 | -0.62500780614467 |
| O | -0.53996901921621 | 2.88590014156526  | -2.47687442635723 |
| C | -0.30382212687140 | 4.27853539853574  | -2.70801252595783 |

|   |                   |                   |                   |
|---|-------------------|-------------------|-------------------|
| C | -0.59404808816333 | 4.61345061193068  | -4.18876622709926 |
| C | -1.18614267704414 | 5.13420592857004  | -1.77831066369673 |
| C | -0.40474582116179 | 6.12051021397790  | -4.47124832098821 |
| H | -1.64379169885562 | 4.31061646261566  | -4.42400086021445 |
| H | 0.06650846512067  | 4.00333300216674  | -4.84846583084336 |
| C | -1.00465905508462 | 6.64440093974723  | -2.04869824021576 |
| H | -2.25324077282489 | 4.84537743067583  | -1.94306149412607 |
| H | -0.96858471779807 | 4.89644832396963  | -0.70868855370970 |
| C | -1.26827489174579 | 6.98689333811377  | -3.53057273435275 |
| H | -0.64722566109735 | 6.33720312502492  | -5.53667585062067 |
| H | 0.67249682231058  | 6.39053215306552  | -4.34156309894329 |
| H | -1.67651343090284 | 7.23330059407567  | -1.38300397873973 |
| H | 0.03756051855212  | 6.94746398245191  | -1.77875494904494 |
| H | -1.07873064914692 | 8.06904722272516  | -3.71563244260117 |
| H | -2.34901887742259 | 6.81777366041486  | -3.76056053536864 |
| C | 2.11310036414960  | 1.13181137617127  | -4.73614011142422 |
| C | 1.82384317676458  | 0.52156285022783  | -3.35252146898849 |
| H | 2.54718476105329  | 0.97137028315871  | -2.61873609322212 |
| H | 2.02902861354436  | 2.24208041843467  | -4.71589346679432 |
| H | 3.14399622184309  | 0.88107312197653  | -5.07313174074460 |
| H | 1.39746411985891  | 0.74360209178919  | -5.49594134360071 |
| C | 2.01415283067425  | -1.00463176103036 | -3.35100371107651 |
| H | 1.78707396512682  | -1.44598002188071 | -2.35645848879996 |
| H | 1.33932209942881  | -1.48275323011992 | -4.09685946131116 |
| H | 3.06263446047782  | -1.27703391778564 | -3.60818553487935 |

|   |                   |                  |                   |
|---|-------------------|------------------|-------------------|
| O | 0.47512938618659  | 0.84665038783457 | -2.97183871831855 |
| H | 0.06951979364136  | 2.06634453808465 | -3.07375771158216 |
| H | -1.19434047046278 | 1.30522148737555 | 2.09824431084113  |
| H | -2.69791628408841 | 2.24099423077449 | 0.83656945872573  |
| H | -0.93685825210014 | 3.34325162609666 | 1.45492996179333  |
| C | 2.02561085117644  | 4.20230280512236 | -0.13809858441232 |
| H | 0.95708733988533  | 4.29339955711298 | -0.40234536778287 |
| H | 2.64684712101793  | 4.62245819517830 | -0.96074459271909 |
| H | 2.21520877064270  | 4.78873207137436 | 0.78771836111764  |

---

### F(Me)-PH3

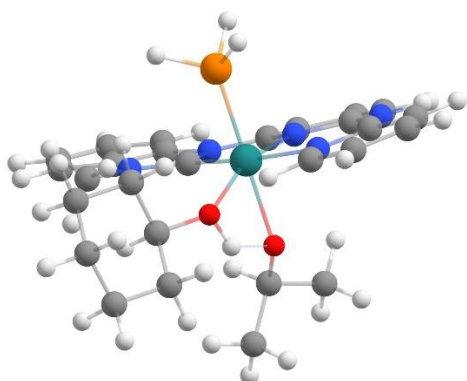

|    |                   |                   |                   |
|----|-------------------|-------------------|-------------------|
| Ru | -0.18388717946528 | 1.30764128937043  | -1.01042137359650 |
| H  | 0.76434476838871  | 4.61215139562711  | -2.56803054013015 |
| P  | -1.22482105796954 | 2.05403011335765  | 0.89278750552287  |
| N  | -1.74731394293045 | -1.59939272193221 | -0.83586590494392 |
| N  | 2.37016285668502  | 2.79834496361206  | 0.08678135420700  |
| N  | -2.13819484996829 | 0.60350831966141  | -1.71497094793561 |
| N  | 2.24194523857772  | 0.60931334827278  | 0.34497920410466  |
| N  | 0.30701825692024  | -0.50321000583639 | -0.24096523721984 |
| C  | 3.46270877441549  | 0.99106145514357  | 0.94795944396047  |

|   |                   |                   |                   |
|---|-------------------|-------------------|-------------------|
| C | -2.55916298479503 | -0.66251221996418 | -1.47679977207877 |
| C | 2.13752333935232  | -1.84313907746983 | 0.67774836100516  |
| H | 3.16960467639471  | -1.90499266739979 | 1.04353944042922  |
| C | -4.28856532381157 | 1.09246101536620  | -2.74663578959813 |
| H | -4.93263509023625 | 1.83163025307517  | -3.25096581007698 |
| C | -3.00050048908845 | 1.45227720347832  | -2.34491934867989 |
| H | -2.59367362289786 | 2.45721145330773  | -2.53742807130630 |
| C | 1.34518833647652  | -2.99983873311010 | 0.56654915948490  |
| H | 1.75068710875486  | -3.98068759675185 | 0.86686309798823  |
| C | 1.58388115803215  | -0.62016374197153 | 0.27965289718678  |
| C | -3.85609022787802 | -1.10766622664760 | -1.85855655765884 |
| H | -4.16457372109770 | -2.14752597348428 | -1.64814408942475 |
| C | 4.48808258321869  | 0.31004971800765  | 1.62887726127787  |
| H | 4.46845308611731  | -0.77337763676743 | 1.81448309480538  |
| C | 1.56217626722480  | 1.72569781586276  | -0.20894528261519 |
| C | 3.53726081014483  | 2.39816376464259  | 0.76364044189109  |
| C | 5.65411806602950  | 2.46447730109191  | 1.89511266142536  |
| H | 6.52832073189257  | 3.02464802668052  | 2.26916672222311  |
| C | 4.62592625821289  | 3.15469885762730  | 1.22412179646591  |
| H | 4.68207782945766  | 4.24478172582962  | 1.06689099354965  |
| C | 5.58105224310761  | 1.06927547623019  | 2.09561084224589  |
| H | 6.39731338039971  | 0.55285915646697  | 2.62945269167684  |
| C | 0.04974680256330  | -2.89853274577564 | 0.06116830435676  |
| H | -0.58740528718240 | -3.79391061020874 | -0.04262495744117 |
| C | -4.72682335947326 | -0.22363909615155 | -2.49518769950898 |

|   |                   |                   |                   |
|---|-------------------|-------------------|-------------------|
| H | -5.73567531962578 | -0.55718239788066 | -2.79458579517154 |
| C | -0.44913062212176 | -1.63249915519506 | -0.34659931580829 |
| H | -2.19742366429054 | -2.51881958453853 | -0.77820245302482 |
| O | -0.52899641588678 | 2.95218626550214  | -2.46459898076196 |
| C | -0.31386339839550 | 4.35404383481496  | -2.73440835365144 |
| C | -0.64484855337292 | 4.65870681694127  | -4.21047588160132 |
| C | -1.18547974727457 | 5.19852582876787  | -1.79011628415400 |
| C | -0.48154138731810 | 6.16525870944788  | -4.51416370712197 |
| H | -1.69601309032546 | 4.33988449338971  | -4.41492208234128 |
| H | 0.00879068231452  | 4.04999948133437  | -4.87859273096026 |
| C | -1.02718001246766 | 6.70777165079254  | -2.08172322340537 |
| H | -2.25284053226695 | 4.89754865758545  | -1.92843468285053 |
| H | -0.93822245213800 | 4.97422792537968  | -0.72459514674888 |
| C | -1.33119095255341 | 7.03131820924337  | -3.56037404896482 |
| H | -0.75515838665754 | 6.36515335463374  | -5.57509264133705 |
| H | 0.59536792897596  | 6.44909095052665  | -4.41706354829856 |
| H | -1.69026250812200 | 7.29446925674080  | -1.40580226274935 |
| H | 0.01721180615104  | 7.02523605185738  | -1.83925458149296 |
| H | -1.15810916133496 | 8.11330092887894  | -3.76095532891702 |
| H | -2.41529037941129 | 6.84839381596186  | -3.76176005460491 |
| C | 2.16254107863626  | 1.05660885836042  | -4.64340716210525 |
| C | 1.79249789051470  | 0.39968612713973  | -3.29840076550525 |
| H | 2.54442808810962  | 0.74816043182759  | -2.53641753538021 |
| H | 2.16196200321008  | 2.16751167054555  | -4.55983820180151 |
| H | 3.17719654673006  | 0.74613200938944  | -4.98099435959250 |

|   |                   |                   |                   |
|---|-------------------|-------------------|-------------------|
| H | 1.43305029550868  | 0.76800197482247  | -5.43424224975560 |
| C | 1.87498801854141  | -1.13782652856460 | -3.38088226537710 |
| H | 1.61711681008706  | -1.61423672689046 | -2.41012341203560 |
| H | 1.16640802926064  | -1.52530625123163 | -4.14812814411172 |
| H | 2.90057560651575  | -1.47448358137174 | -3.65603143553175 |
| O | 0.47793085900177  | 0.82088729222238  | -2.93083453592688 |
| H | 0.00162363544053  | 2.27774497845152  | -3.08105031748376 |
| H | -1.12729258431516 | 1.29543717552610  | 2.12149029412926  |
| H | -2.65952019454422 | 2.21447936193095  | 0.88862169866396  |
| H | -0.90694536902314 | 3.33496147893277  | 1.48219168674965  |
| C | 2.06843608300285  | 4.19512814623883  | -0.19606629435769 |
| H | 0.99504973624957  | 4.28685347990229  | -0.44094319754332 |
| H | 2.67710402462344  | 4.57798753546164  | -1.04617690372976 |
| H | 2.28171017299926  | 4.81419387388142  | 0.70266031306927  |

---

**Why does the 2-propanol fail to protonate the anionic NHC?**

**MLC A'**

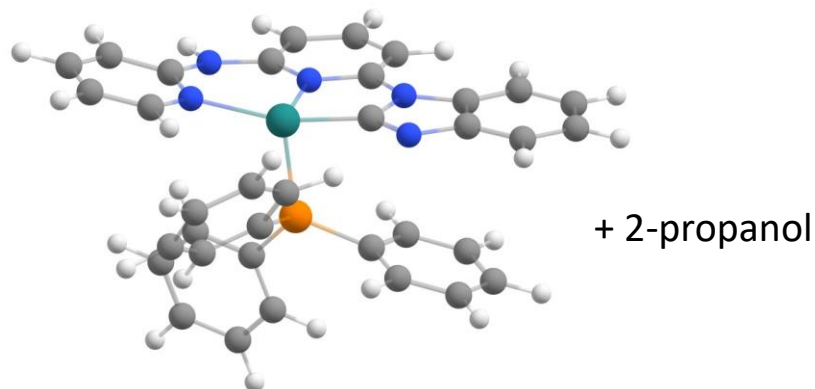

|    |                   |                   |                   |
|----|-------------------|-------------------|-------------------|
| Ru | -0.52235708220494 | 1.81825162477023  | 0.29769131833368  |
| P  | -0.93708740789973 | 0.78163683439316  | 2.19785824522786  |
| N  | -2.58993756006367 | 0.57515199175044  | -1.90837381941760 |
| N  | 2.38087137212906  | 1.73410311795290  | 1.34957606981400  |
| N  | -2.36843462705160 | 2.50802275545702  | -0.50989666879883 |
| N  | 1.75865914655880  | 0.13882258626022  | -0.14204060054279 |
| N  | -0.37759669279964 | 0.30143239119588  | -1.00384926890249 |
| C  | 0.39269278655691  | -0.14649801878862 | 3.03427754735574  |
| C  | 3.07469549889329  | -0.19869705304548 | 0.23960961561043  |
| C  | -3.04051251009291 | 1.81914807950899  | -1.47513034826938 |
| C  | 0.99904805206296  | -1.57872790492082 | -1.75409273539924 |
| C  | -2.48090823806714 | -0.16169917439597 | 2.49023102043341  |
| C  | -4.02863397877679 | 4.28121081019138  | -0.63368699346234 |
| C  | -1.12883924585980 | 2.49785604812995  | 2.80841388161618  |
| C  | -2.86048649099331 | 3.72437319140844  | -0.11750857740734 |
| C  | -3.63122092053373 | 0.11013720959329  | 1.71144614510788  |
| C  | -0.06377119584789 | -2.02417135766407 | -2.55753607370065 |
| C  | 0.82447429271428  | -0.41499923394414 | -0.98699467490943 |
| C  | -4.24061050970478 | 2.32599782653259  | -2.04797082995867 |

|   |                   |                   |                   |
|---|-------------------|-------------------|-------------------|
| C | 3.95332375718974  | -1.24652416629962 | -0.07743823666059 |
| C | 0.75900264396749  | -1.40353264753015 | 2.49313923042424  |
| C | 1.37795981118885  | 1.32459187617448  | 0.59354672537736  |
| C | 3.43684549189775  | 0.83241213606297  | 1.17258324292102  |
| C | -0.28164341343404 | 4.79854645495513  | 2.65550303470012  |
| C | 5.57378915411560  | -0.24689123703080 | 1.49012538551121  |
| C | 1.14317240396521  | 0.41919988267252  | 4.08789650731362  |
| C | 4.69704934027868  | 0.81051831923392  | 1.79719672712096  |
| C | -3.73993734028376 | -1.83395422563576 | 3.74849582706662  |
| C | 5.20791553424944  | -1.25655244862308 | 0.56984401907475  |
| C | -0.05245576247449 | 3.40502882893182  | 2.52656636010305  |
| C | -1.26065958729874 | -1.30242653680936 | -2.59731604736933 |
| C | 2.63567460358336  | -1.51211190099852 | 4.04402091583502  |
| C | -2.38434631807212 | 3.00085575630844  | 3.25426261248383  |
| C | -4.73718226713344 | 3.55790318289271  | -1.62039897493259 |
| C | 2.26111658550173  | -0.27047396160141 | 4.59131059516445  |
| C | -4.82754817025356 | -0.58526770580941 | 1.95600574052486  |
| C | -1.52457219156245 | 5.28509169524578  | 3.08902780715133  |
| C | 1.88003223289906  | -2.08167156460313 | 3.00036333287818  |
| C | -2.53943888506659 | -1.13945669588952 | 3.51281256492666  |
| C | -4.88244531334461 | -1.56035802690573 | 2.97193380114263  |
| C | -1.38738432807778 | -0.12813250336401 | -1.81356155477226 |
| C | -2.56795332879992 | 4.38106359397913  | 3.40816129998728  |
| H | 1.95232700825987  | -2.12334475020930 | -1.72329897729402 |
| H | -4.37733864572552 | 5.26268634615654  | -0.27296600779844 |



|   |                   |                   |                   |
|---|-------------------|-------------------|-------------------|
| H | -2.26976578240217 | 4.25075673059466  | 0.65220068002715  |
| H | -3.58851536258666 | 0.87728620950214  | 0.92232668088026  |
| H | 0.05008914059800  | -2.93757777025131 | -3.16594455770306 |
| H | -4.76483398277124 | 1.74892086309378  | -2.83058039163105 |
| H | 3.70436234695264  | -2.04714261189794 | -0.79226382941375 |
| H | 0.17163648756046  | -1.85240912707355 | 1.67062193138681  |
| H | 0.54664783618151  | 5.49771510017164  | 2.44313644184369  |
| H | 6.56658766099654  | -0.28964305843458 | 1.97169746229442  |
| H | 0.86481693077297  | 1.40112068938758  | 4.50758576095936  |
| H | 4.97184305941044  | 1.60370754651925  | 2.51308738923381  |
| H | -3.78189804187843 | -2.59488486298553 | 4.54772407839862  |
| H | 5.91764468644014  | -2.07214364157239 | 0.34593023324553  |
| H | 0.97490287947116  | 3.03826293189984  | 2.31861928699234  |
| H | -2.09836368193034 | -1.62819677099435 | -3.23776165208254 |
| H | 3.52478389299369  | -2.03997382767476 | 4.43066357425082  |
| H | -3.20773469241102 | 2.30242579021785  | 3.48460928119629  |
| H | -5.66600499019698 | 3.96146954242128  | -2.05971060475916 |
| H | 2.85059503283789  | 0.17338317372155  | 5.41260027047099  |
| H | -5.72406837632423 | -0.36605940734000 | 1.34932637060092  |
| H | -1.68454885326260 | 6.37184268286925  | 3.20415556062576  |
| H | 2.17156493723748  | -3.05676505198876 | 2.57289502246240  |
| H | -1.64853539443869 | -1.35693330520206 | 4.12714751631077  |
| H | -5.82182236931188 | -2.10992284109118 | 3.16008990350347  |
| H | -3.53443849434801 | 4.76524953621438  | 3.78058828366358  |
| H | -3.23889257417963 | 0.13046005420389  | -2.56638387636826 |

---

**MLC-TS-I'**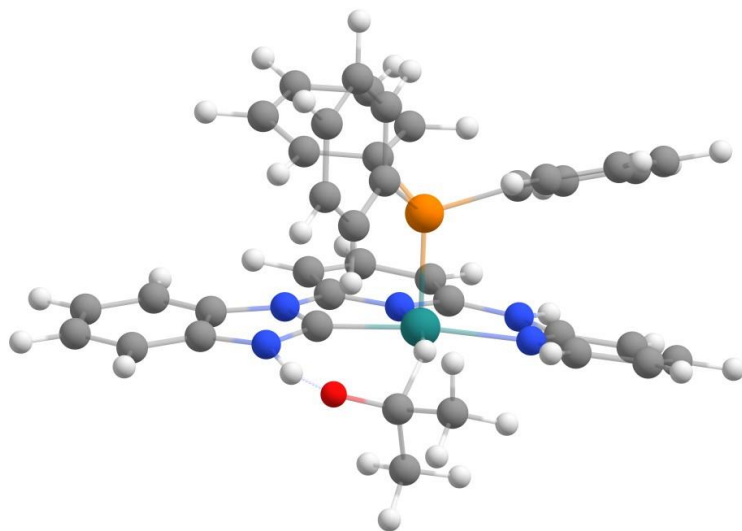

|    |                   |                   |                   |
|----|-------------------|-------------------|-------------------|
| Ru | -0.54655907449814 | 1.76092272356456  | -0.28686962311069 |
| H  | -0.73579187104650 | 3.51244106507518  | 0.05059772960748  |
| P  | -1.08144553798674 | 1.28859405711628  | 1.83055880973914  |
| N  | -2.12417195997047 | -0.78220587533715 | -1.68970199082052 |
| N  | 2.27919640633970  | 2.72652967216742  | 0.43082300521496  |
| N  | -2.51457149943759 | 1.53003443406335  | -1.10768503873651 |
| N  | 2.02891329454394  | 0.53174369291258  | 0.07456061595167  |
| N  | -0.01813360226294 | -0.18824508904186 | -0.72229886632220 |
| C  | -0.28170430006008 | -0.28314673366845 | 2.41344410372693  |
| C  | 3.40229449679912  | 0.71898719141213  | 0.35804472328526  |
| C  | -2.92426007338599 | 0.36448654207150  | -1.68133448548750 |
| C  | 1.72386155867558  | -1.87462269285381 | -0.45469144681607 |
| C  | -2.92430948132128 | 1.18131448544021  | 1.98384966356885  |
| C  | -4.70735556984599 | 2.49411423520844  | -1.55626681465411 |
| C  | -0.62496341164639 | 2.42686694967384  | 3.21096590742098  |

|   |                   |                   |                   |
|---|-------------------|-------------------|-------------------|
| C | -3.41634183038608 | 2.55709167180795  | -1.03734710612033 |
| C | -3.62022637597321 | 2.28404314148865  | 2.53632371887727  |
| C | 0.84112537438482  | -2.84491474264475 | -0.96297297513590 |
| C | 1.27226146513635  | -0.55189979865761 | -0.36198000791123 |
| C | -4.21540588766107 | 0.23798208876393  | -2.26720404841947 |
| C | 4.51051088146333  | -0.13913365480741 | 0.45183877397442  |
| C | -0.85837631933402 | -1.56893746485501 | 2.31250519839823  |
| C | 1.36413232315696  | 1.78625511253828  | 0.15690721849062  |
| C | 3.53914369437230  | 2.12949176769532  | 0.57145663605856  |
| C | 0.30400819565869  | 4.49470466894110  | 4.10612242264126  |
| C | 5.89480058166753  | 1.83417532082564  | 0.97067728283536  |
| C | 1.05135528059727  | -0.16373978675104 | 2.88201302006172  |
| C | 4.78741574622336  | 2.69822155382975  | 0.87660625702923  |
| C | -5.07458034397842 | 0.16497940313034  | 1.39321941562579  |
| C | 5.75753533423670  | 0.44258289535893  | 0.76289495288083  |
| C | -0.00139695302751 | 3.67259647722576  | 3.00152610377119  |
| C | -0.44310767625394 | -2.47982243608661 | -1.37526553965479 |
| C | 1.21493061680497  | -2.58620629088175 | 3.10745127131517  |
| C | -0.93896800339916 | 2.00440435583506  | 4.52835550650528  |
| C | -5.10930719516086 | 1.30564462521435  | -2.20444031085009 |
| C | 1.79338920363164  | -1.30702008421921 | 3.22289674408343  |
| C | -5.02711669693598 | 2.31982042207289  | 2.52207188957475  |
| C | -0.01185391091670 | 4.07978740225159  | 5.41163251487967  |
| C | -0.11329037652601 | -2.71162519443660 | 2.66084781964920  |
| C | -3.66996762514527 | 0.12918380409085  | 1.39829247185461  |

|   |                   |                   |                   |
|---|-------------------|-------------------|-------------------|
| C | -5.75878875024126 | 1.26035763332481  | 1.95553743251405  |
| C | -0.84654572540653 | -1.12532336005944 | -1.24595673954061 |
| C | -0.63471759104806 | 2.83134946554735  | 5.62123554270250  |
| H | 1.80157662246975  | 3.87827228826210  | 0.29569925146310  |
| H | 2.73514990332191  | -2.14798901971951 | -0.12703311567412 |
| H | -5.38331845912899 | 3.35881993095040  | -1.45727723640505 |
| H | -3.05349312387888 | 3.45821538515511  | -0.51677897339792 |
| H | -3.06027016964495 | 3.12370379949436  | 2.98239693555748  |
| H | 1.16631124623891  | -3.89635978110971 | -1.04034920724410 |
| H | -4.50751260470617 | -0.71078098164169 | -2.75211773669649 |
| H | 4.44038406468833  | -1.22633866679252 | 0.29361183191776  |
| H | -1.90241087651974 | -1.69923027887110 | 1.98867366339772  |
| H | 0.79790294140603  | 5.46721974280481  | 3.93310594336682  |
| H | 6.88830992253445  | 2.25024862864297  | 1.21243641807798  |
| H | 1.51334921944847  | 0.83336371145385  | 2.99336394742505  |
| H | 4.88696184023549  | 3.78481868422783  | 1.03882195977966  |
| H | -5.64087724189231 | -0.66963792378809 | 0.94303551469900  |
| H | 6.64462587213317  | -0.20922569477726 | 0.84466989355371  |
| H | 0.27385529040229  | 4.02004809424139  | 1.99198701944773  |
| H | -1.13929845989577 | -3.22860727001943 | -1.79119260584129 |
| H | 1.79562654056234  | -3.48501879155071 | 3.38102518829856  |
| H | -1.42307726974126 | 1.02596196012052  | 4.70175737023480  |
| H | -6.11588185180549 | 1.21243279284442  | -2.64775474450675 |
| H | 2.82914314165786  | -1.19365905270754 | 3.58897766715275  |
| H | -5.55353273594866 | 3.18516661453920  | 2.96253520918836  |

|   |                   |                   |                   |
|---|-------------------|-------------------|-------------------|
| H | 0.22960814547903  | 4.72695735335316  | 6.27361874471856  |
| H | -0.58276277305840 | -3.70879122480499 | 2.58895621769812  |
| H | -3.16060347505954 | -0.72044925837483 | 0.91586965932438  |
| H | -6.86279607553267 | 1.28721392056417  | 1.94982254405634  |
| H | -0.88256556179468 | 2.49868903480867  | 6.64489970878703  |
| H | -2.59963540376194 | -1.57674889598073 | -2.13035640029847 |
| C | -0.09843487716082 | 4.56350590396048  | -0.53003202597819 |
| O | 0.99320599760697  | 4.84607735777283  | 0.16409150594254  |
| C | -1.22060515316438 | 5.60065413160731  | -0.32027926770811 |
| H | -0.84931826651866 | 6.58517945212394  | -0.68567210884867 |
| H | -2.14759752551876 | 5.35589707489060  | -0.88275942452560 |
| H | -1.46085660082098 | 5.70986819457061  | 0.75878294384967  |
| C | 0.09822832915400  | 4.16109942658202  | -2.01172858450202 |
| H | 0.85178034319976  | 3.34891463399403  | -2.14007762627512 |
| H | -0.85261698043367 | 3.86891221953131  | -2.51087092691705 |
| H | 0.50402925461193  | 5.04463284929452  | -2.55890091177664 |

---

**1a'**

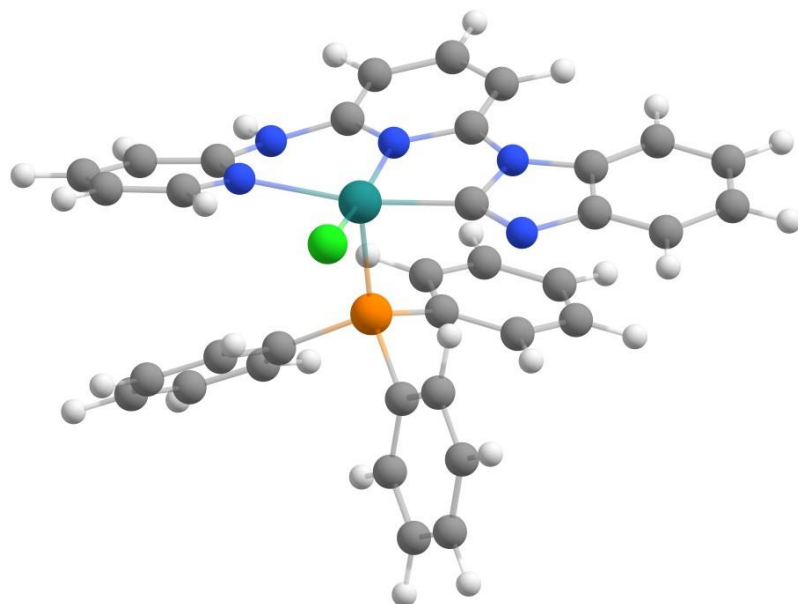

|    |                   |                   |                   |
|----|-------------------|-------------------|-------------------|
| Ru | -0.51752238684511 | 1.74936123361106  | -0.38180289899144 |
| P  | -1.03090030071777 | 1.30047021347956  | 1.71838851952794  |
| N  | -2.31695020961540 | -0.85196308153146 | -1.26061301595347 |
| N  | 2.28202770271189  | 2.56140383223932  | 0.70525921919410  |
| N  | -2.51050580535749 | 1.54278285195482  | -1.28693923706670 |
| N  | 2.03355245707215  | 0.45405131657866  | -0.11988580808994 |
| N  | -0.06146990599563 | -0.18904382278255 | -0.82250130041570 |
| C  | -0.15251922686872 | -0.20786332251325 | 2.33416660799597  |
| C  | 3.36017858480029  | 0.52213113088922  | 0.33449594398347  |
| C  | -3.07036023832903 | 0.31228518611935  | -1.42253374365401 |
| C  | 1.73122343961685  | -1.84777714575867 | -0.98140772331479 |
| C  | -2.85649884286820 | 1.06768224154614  | 1.94440041301268  |
| C  | -4.62877545284767 | 2.54293813942285  | -1.94734390389637 |
| C  | -0.67515442945142 | 2.54732206995162  | 3.04799482901593  |
| C  | -3.28330851381197 | 2.62807048617247  | -1.58307520860895 |
| C  | -3.65132628247886 | 2.18201840462052  | 1.57587086819468  |

|   |                   |                   |                   |
|---|-------------------|-------------------|-------------------|
| C | 0.81081327619945  | -2.79332072091781 | -1.45791109850727 |
| C | 1.26839756077577  | -0.56061214939615 | -0.64844154551794 |
| C | -4.44808644641302 | 0.14606338415832  | -1.73534238133469 |
| C | 4.43303811710816  | -0.38334559050842 | 0.39595705612446  |
| C | -0.52771790242082 | -1.51135499086947 | 1.92738512020869  |
| C | 1.39255436946559  | 1.74964192669466  | 0.15065165871551  |
| C | 3.48084156750727  | 1.86379178356719  | 0.83990587532783  |
| C | 0.47832062505463  | 4.50342589852444  | 3.92679264343034  |
| C | 5.77229685821987  | 1.38880619466344  | 1.46342370362345  |
| C | 1.06844941208335  | -0.03160610244866 | 3.02802537243400  |
| C | 4.69733222445228  | 2.29658317593205  | 1.40353350990736  |
| C | -4.89231440871255 | -0.16884950916809 | 2.49801044564428  |
| C | 5.64135488267677  | 0.07050451361028  | 0.96951414848856  |
| C | 0.22624504077531  | 3.61656277826768  | 2.86073079533429  |
| C | -0.54124298702291 | -2.44713027783187 | -1.58153814273764 |
| C | 1.51027327971377  | -2.42865339833457 | 2.90621507000721  |
| C | -1.31496530597897 | 2.37262404172936  | 4.29998176140988  |
| C | -5.23338422044434 | 1.27008266521259  | -1.99445012507013 |
| C | 1.89605908932381  | -1.13455321653902 | 3.30423592131448  |
| C | -5.05111288775049 | 2.10972737829663  | 1.65285411430532  |
| C | -0.15821868043929 | 4.33309119380942  | 5.16939911069355  |
| C | 0.29351231660976  | -2.61382188650759 | 2.22264394651339  |
| C | -3.48616562093460 | -0.10148160989800 | 2.42469754466841  |
| C | -5.67746858483481 | 0.92955542684494  | 2.10289158420651  |
| C | -0.94601157573591 | -1.13486099675030 | -1.23634746831197 |

|   |                   |                   |                   |
|---|-------------------|-------------------|-------------------|
| C | -1.05539343082219 | 3.26208630996268  | 5.35627376239795  |
| H | 2.79286516319856  | -2.10302687607518 | -0.86813714516884 |
| H | -5.19580131637705 | 3.46322510123721  | -2.16642432087630 |
| H | -2.76420055877486 | 3.59883487812707  | -1.46319462351095 |
| H | -3.15885050826087 | 3.10987826473891  | 1.22882637222464  |
| H | 1.15094391753562  | -3.80670114334517 | -1.73250958902905 |
| H | -4.88114295332908 | -0.86932737586862 | -1.78415706815406 |
| H | 4.36454327252155  | -1.42031194265017 | 0.02979289854499  |
| H | -1.45737568382206 | -1.67044378295949 | 1.35683781597749  |
| H | 1.18493411634408  | 5.33917035403587  | 3.77507279447765  |
| H | 6.73346671070732  | 1.70886348670427  | 1.90459973045007  |
| H | 1.38916788021729  | 0.97990540920313  | 3.33135707218966  |
| H | 4.78399405064911  | 3.32695197857696  | 1.78972421373894  |
| H | -5.37474091658285 | -1.08760102962066 | 2.87850820432862  |
| H | 6.49773838323904  | -0.62448226147062 | 1.03254001415001  |
| H | 0.75196589575534  | 3.74439583734282  | 1.89966041911533  |
| H | -1.28650842109963 | -3.17558868136773 | -1.94597860919097 |
| H | 2.16300476921260  | -3.29359389224713 | 3.12155878194469  |
| H | -2.02346881700527 | 1.53864717757482  | 4.45299068188286  |
| H | -6.30335454861468 | 1.15338797014938  | -2.24156534239264 |
| H | 2.85576279232799  | -0.97540658769423 | 3.82670393498236  |
| H | -5.65900369797069 | 2.98399117197669  | 1.35887389166174  |
| H | 0.04269445859966  | 5.03646340737096  | 5.99803869227081  |
| H | -0.01357431063190 | -3.62403315148673 | 1.89731801167524  |
| H | -2.88539507255942 | -0.95898416026032 | 2.77055884073273  |



|    |                   |                   |                   |
|----|-------------------|-------------------|-------------------|
| H  | -6.77954658691188 | 0.87256676911174  | 2.15862829135831  |
| H  | -1.55971449015666 | 3.12010972042632  | 6.32927562302517  |
| H  | -2.87480947017437 | -1.69479465052994 | -1.42885446477909 |
| Cl | -0.75886121550657 | 4.10689805289624  | -0.32870106583886 |

---

**TS-1-Cl**

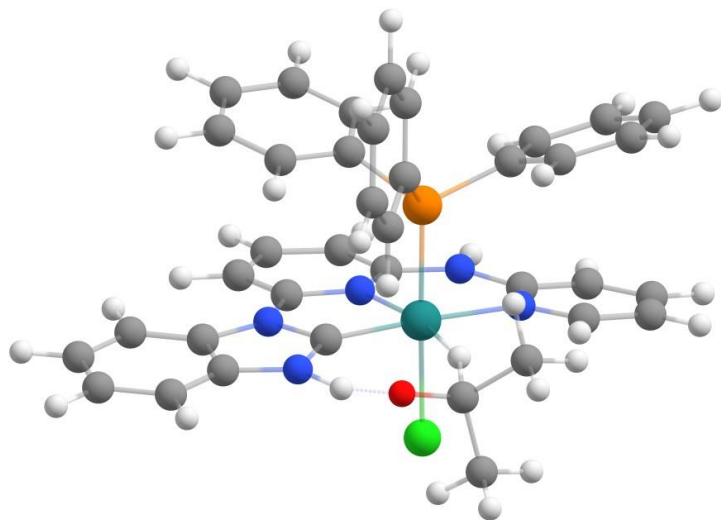

|    |                   |                   |                   |
|----|-------------------|-------------------|-------------------|
| Ru | -0.53779320998570 | 1.68452821098464  | -0.42770439436212 |
| H  | -0.64639586474257 | 3.51818319314213  | -0.25146918492940 |
| P  | -1.13099219025345 | 1.34371675087766  | 1.77145507401708  |
| N  | -2.13873200281636 | -0.96842700382879 | -1.47078258292200 |
| N  | 2.24347988230977  | 2.77116301594275  | 0.25426164239820  |
| N  | -2.54336453885108 | 1.38063287021363  | -1.11616487023423 |
| N  | 2.05703012649857  | 0.56249921900727  | -0.02371176191236 |
| N  | -0.00044039159994 | -0.26780146370824 | -0.65545262820025 |
| C  | -0.37459908398511 | -0.25216359685772 | 2.38794797933035  |
| C  | 3.41560049183049  | 0.79635724775147  | 0.27588844275531  |
| C  | -2.94593824359756 | 0.16966948376804  | -1.57500496327160 |
| C  | 1.82508963237958  | -1.87109733312685 | -0.47574589727862 |

|   |                   |                   |                   |
|---|-------------------|-------------------|-------------------|
| C | -2.97948099301422 | 1.29726313799162  | 1.97740414450235  |
| C | -4.71543035306612 | 2.30814964027056  | -1.68977944277537 |
| C | -0.65595483546257 | 2.40282087896659  | 3.22963325870107  |
| C | -3.42180633157604 | 2.41715391771736  | -1.17590268369374 |
| C | -3.62570887722923 | 2.47195151913599  | 2.43583197070302  |
| C | 0.95473896294554  | -2.88933466583221 | -0.90205864251867 |
| C | 1.32246981961795  | -0.56499062705051 | -0.38250339195521 |
| C | -4.23881878990428 | -0.01714486154040 | -2.13918817231967 |
| C | 4.54230541937429  | -0.02735843921999 | 0.43183966294880  |
| C | -0.96132080395781 | -1.53354322686151 | 2.29575218729397  |
| C | 1.35152572516884  | 1.79924371481793  | -0.00488717767087 |
| C | 3.51222189952150  | 2.21828514912958  | 0.44363743370088  |
| C | 0.51990045817265  | 4.28121822990184  | 4.24774069318633  |
| C | 5.86725254802656  | 1.99329969442977  | 0.90980036394954  |
| C | 0.97297261428825  | -0.15790318923374 | 2.82187126044800  |
| C | 4.73929768130023  | 2.82499906973239  | 0.75920379963337  |
| C | -5.18397662445644 | 0.34873565522075  | 1.46227907383072  |
| C | 5.76998546492350  | 0.59331447136406  | 0.75088700685425  |
| C | 0.15090218291509  | 3.54966447687078  | 3.09765383333924  |
| C | -0.36729200471926 | -2.58361910964970 | -1.23848439173430 |
| C | 1.11969589266258  | -2.58333495756595 | 3.02928034119344  |
| C | -1.08317985321317 | 1.99007096181468  | 4.51765514708675  |
| C | -5.12851571691853 | 1.05668147873971  | -2.19166679216995 |
| C | 1.71177270818038  | -1.31005390856254 | 3.13779443658782  |
| C | -5.02811470441754 | 2.58017513821102  | 2.41057439012352  |

|   |                   |                   |                   |
|---|-------------------|-------------------|-------------------|
| C | 0.09252904324604  | 3.87433313447526  | 5.52278790498803  |
| C | -0.22026379303298 | -2.68797827766249 | 2.61578656753642  |
| C | -3.78174852441169 | 0.24368926590917  | 1.47765948283513  |
| C | -5.81442974509132 | 1.51770846181965  | 1.92767869821868  |
| C | -0.81665388995430 | -1.24347795342847 | -1.11627293515950 |
| C | -0.71402038567248 | 2.72376296372439  | 5.65592040778835  |
| H | 1.77970755034561  | 3.86894511117120  | 0.26315164992702  |
| H | 2.87088602352413  | -2.09039457347473 | -0.22484226756356 |
| H | -5.37978485526007 | 3.18744471619901  | -1.70078889827535 |
| H | -3.04236184552871 | 3.37258258322737  | -0.77817506860206 |
| H | -3.02486186361315 | 3.31661296396007  | 2.81530869893195  |
| H | 1.31960189488024  | -3.92756441026068 | -0.98231051203421 |
| H | -4.53228896190303 | -1.01073771839914 | -2.52404119080875 |
| H | 4.49664706415648  | -1.12138863170761 | 0.31597037228489  |
| H | -2.01183826570781 | -1.65299746679628 | 1.98806131027706  |
| H | 1.14986847956652  | 5.18136790190931  | 4.12976790427155  |
| H | 6.84411437206535  | 2.44496828275392  | 1.15794096814974  |
| H | 1.45361330763877  | 0.83181493181583  | 2.91829988887884  |
| H | 4.80750501940606  | 3.91905414795779  | 0.88410337388735  |
| H | -5.78813157676818 | -0.48875516191281 | 1.06947980823859  |
| H | 6.66968258272139  | -0.03442327931879 | 0.87680987400924  |
| H | 0.49536465557313  | 3.91033796914371  | 2.10929757341052  |
| H | -1.05740286303526 | -3.36705154049039 | -1.59791872868407 |
| H | 1.69972248205077  | -3.49114561153187 | 3.27428066201802  |
| H | -1.70672563564928 | 1.08398445387951  | 4.62916274858841  |

|    |                   |                   |                   |
|----|-------------------|-------------------|-------------------|
| H  | -6.13630054853753 | 0.92044586841636  | -2.62170708589277 |
| H  | 2.76056405743504  | -1.20795872687711 | 3.46976713963254  |
| H  | -5.50831976885109 | 3.50715614115435  | 2.77274822450799  |
| H  | 0.38609444084380  | 4.45024761619012  | 6.41933815900368  |
| H  | -0.70165038392976 | -3.67972617899070 | 2.53956628559413  |
| H  | -3.31598264537762 | -0.66303903979227 | 1.06032940938944  |
| H  | -6.91572520153438 | 1.60234381652313  | 1.90809493911286  |
| H  | -1.05331641209026 | 2.39509847043538  | 6.65506457228290  |
| H  | -2.61080028146068 | -1.80212547297189 | -1.83321723025926 |
| C  | -0.23792827862093 | 4.76840231767982  | -0.26498416307938 |
| O  | 0.91701062552406  | 4.89302743036411  | 0.38173743261426  |
| C  | -1.42669830587107 | 5.43172373949443  | 0.47330440736406  |
| H  | -1.24546789622563 | 6.53066145481057  | 0.51765769174932  |
| H  | -2.39733422176256 | 5.26700306428591  | -0.04638899715146 |
| H  | -1.51098943581891 | 5.05954813611084  | 1.51631202092083  |
| C  | -0.19750744955554 | 5.10641600926877  | -1.76570883375335 |
| H  | 0.56351765426274  | 4.49515150126279  | -2.29304789949552 |
| H  | -1.17482645036219 | 4.93382933198609  | -2.26869777787155 |
| H  | 0.07060249642205  | 6.18458356319059  | -1.86426048040525 |
| Cl | -0.02505836038439 | 1.87421395153128  | -2.80711127201170 |

---

2b

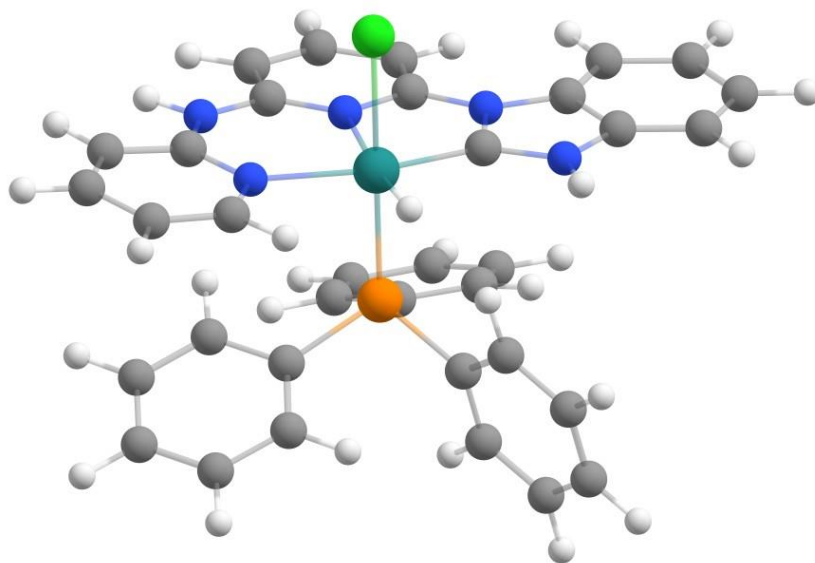

|    |                   |                   |                   |
|----|-------------------|-------------------|-------------------|
| Ru | -0.52644371329197 | 1.71065178830996  | -0.37851194382945 |
| H  | -0.78151559277197 | 3.30571199448253  | -0.07563793011454 |
| P  | -1.13794395324496 | 1.32510116875768  | 1.76622830501409  |
| N  | -2.13374478320011 | -0.86804421597270 | -1.69531647450645 |
| N  | 2.27376585090820  | 2.56264097332870  | 0.61982429275898  |
| N  | -2.51608303671004 | 1.45817862651384  | -1.13725022175408 |
| N  | 2.03810697471007  | 0.47163557385087  | -0.04685055872507 |
| N  | 0.00597187760587  | -0.28059465972384 | -0.82387681381046 |
| C  | -0.31966045025915 | -0.21661326229568 | 2.42976248894858  |
| C  | 3.37886417030163  | 0.60126996368825  | 0.36463952364212  |
| C  | -2.92574667839781 | 0.28883747843770  | -1.69236403821832 |
| C  | 1.76913574773253  | -1.94221271843507 | -0.62817322728748 |
| C  | -2.96790713920711 | 1.15161695176899  | 2.05909164149811  |
| C  | -4.69022567820805 | 2.43735209055669  | -1.61570771592127 |
| C  | -0.66073441617048 | 2.55726692285401  | 3.08201580456258  |

|   |                   |                   |                   |
|---|-------------------|-------------------|-------------------|
| C | -3.38999698692142 | 2.50190997075712  | -1.10798075134309 |
| C | -3.68707531854530 | 2.14696526687919  | 2.76194102452390  |
| C | 0.88095535660530  | -2.91885605432559 | -1.11612387600830 |
| C | 1.29621760071725  | -0.62555572904486 | -0.51219084249954 |
| C | -4.22537216259298 | 0.15604594087213  | -2.25817108372436 |
| C | 4.48192515077418  | -0.26872568093342 | 0.41878181811559  |
| C | -0.89307026426315 | -1.50625911627040 | 2.34811276871996  |
| C | 1.32679056574409  | 1.70080527403816  | 0.12089902816114  |
| C | 3.51874140253554  | 1.95770106776590  | 0.79504874195138  |
| C | 0.01431427611887  | 4.82541900084572  | 3.70190160250307  |
| C | 5.82914838450220  | 1.57325305687635  | 1.34699840878290  |
| C | 1.04004189133021  | -0.10985871040684 | 2.81885170524450  |
| C | 4.73214223081142  | 2.45778339732520  | 1.28874604375248  |
| C | -5.10283411658903 | 0.09305306990471  | 1.46575103583388  |
| C | 5.70353894745780  | 0.23589519325136  | 0.91678245110909  |
| C | -0.33338698013688 | 3.88067159398671  | 2.71612729064037  |
| C | -0.42426820482037 | -2.56369978123020 | -1.47947129742852 |
| C | 1.23007779481019  | -2.53587631717253 | 2.98310837203144  |
| C | -0.64665631854866 | 2.19291522769080  | 4.44950918025042  |
| C | -5.11255655628134 | 1.23292013800833  | -2.21328961392056 |
| C | 1.80617960936069  | -1.25524062262068 | 3.09368354297045  |
| C | -5.09374639931636 | 2.11389691741392  | 2.81630471098568  |
| C | 0.03860628465164  | 4.45445731823046  | 5.05979922595800  |
| C | -0.12393355006848 | -2.65393053588215 | 2.61930046749989  |
| C | -3.69954627585439 | 0.13014613101096  | 1.40340753531880  |

|   |                   |                   |                   |
|---|-------------------|-------------------|-------------------|
| C | -5.80742222393186 | 1.08759668278814  | 2.17106396802467  |
| C | -0.82908488845302 | -1.21282592675001 | -1.32498263223590 |
| C | -0.29592300280760 | 3.13648059960488  | 5.43181647485624  |
| H | 2.04413293001426  | 3.54014576373967  | 0.81599132259331  |
| H | 2.79076956853506  | -2.21552057764895 | -0.33597994643680 |
| H | -5.35100397864855 | 3.31728379495122  | -1.55072143297952 |
| H | -2.98740041428289 | 3.41693527468017  | -0.64312593773868 |
| H | -3.14532620490256 | 2.96584805785571  | 3.26528893823800  |
| H | 1.21644028801160  | -3.96543944823893 | -1.21510080813999 |
| H | -4.52682883947166 | -0.80095789046090 | -2.72199259663927 |
| H | 4.42595446870081  | -1.31306150207147 | 0.07869406798264  |
| H | -1.95500592148784 | -1.62984546007921 | 2.08075703600888  |
| H | 0.26568580758405  | 5.86039058851593  | 3.40592019116354  |
| H | 6.79878701882710  | 1.93621197416347  | 1.73061709599049  |
| H | 1.50912407983067  | 0.88598754925445  | 2.90887979104942  |
| H | 4.82226583769378  | 3.50726349217095  | 1.61822760020872  |
| H | -5.65107334562738 | -0.71271129547516 | 0.94511348936630  |
| H | 6.57789575409571  | -0.43667955708414 | 0.96394272864271  |
| H | -0.37283103536796 | 4.14906246525499  | 1.64186047828949  |
| H | -1.12654771738901 | -3.31753992640996 | -1.87775098001535 |
| H | 1.83284689897393  | -3.43842331982925 | 3.18981663513569  |
| H | -0.90872614734278 | 1.16169454226294  | 4.74833798800151  |
| H | -6.12499823197268 | 1.13397468105029  | -2.64317071763311 |
| H | 2.86444410117177  | -1.14296480006406 | 3.39077787602590  |
| H | -5.63551050237349 | 2.90387821044788  | 3.36753932755583  |

|    |                   |                   |                   |
|----|-------------------|-------------------|-------------------|
| H  | 0.31568842319228  | 5.19401589284036  | 5.83290516982656  |
| H  | -0.59309356709767 | -3.65178413262189 | 2.54545165536926  |
| H  | -3.17215486187817 | -0.63441358680670 | 0.80989632437127  |
| H  | -6.91131019277102 | 1.06539633617466  | 2.21124450277219  |
| H  | -0.28407145731368 | 2.84160069742119  | 6.49690002656619  |
| H  | -2.62735431442445 | -1.65912928773526 | -2.11931379366087 |
| Cl | 0.03003612963561  | 2.35495541500666  | -2.67438446424527 |
